# Supplementary material for: A proteotranscriptomic study of silk-producing glands from the orb-weaving spiders
Source: Royal Society of Chemistry journal article supplement (doi:10.1039/c9mo00087a), 2019-06-25
Supplement: c9mo00087a1.pdf [file c9mo00087a1.pdf]

## Electronic Supplementary Information (ESI)

### Figures

#### **A proteotranscriptomic study of silk-producing glands from the orb-weaving spiders**

José Roberto Aparecido dos Santos-Pinto<sup>a</sup>, Franciele Grego Esteves<sup>a</sup>, Fernando J. Sialana<sup>c</sup>,  
Milene Ferro<sup>a</sup>, Roman Smidak<sup>c</sup>, Lucaciu Calin Rares<sup>d</sup>, Thomas Nussbaumer<sup>d</sup>, Thomas Rattei<sup>d</sup>,  
Martin Bilban<sup>e</sup>, Mauricio Bacci Júnior<sup>a</sup>, Mario Sergio Palma<sup>a\*</sup> and Gert Lubec<sup>b\*</sup>

<sup>a</sup>Center of the Study of Social Insects, Department of Biology, Institute of Biosciences of Rio Claro, São Paulo State University, Rio Claro, SP, 13500 Brazil; <sup>b</sup>Paracelsus Medical University, A 5020 Salzburg, Austria; <sup>c</sup>Department of Pharmaceutical Chemistry, University of Vienna, 1090 Austria; <sup>d</sup>Division of Computational System Biology, Department of Microbiology and Ecosystem Science, University of Vienna, 1090 Vienna, Austria; <sup>e</sup>Department of Laboratory Medicine and Core Facility Genomics, Medical University of Vienna, Vienna, Austria 1090.

\*Corresponding authors. Prof. Dr. Gert Lubec, Paracelsus Medical University, A 5020 Salzburg, Austria. E-mail: gert.lubec@lubeclab.com., and Prof. Dr. Mario Sergio Palma, CEIS-IBRC- UNESP, Av. 24A, nº 1515, Bela Vista - Rio Claro, SP, Brazil, CEP 13506-900, E-mail: Mario.palma@unesp.br.



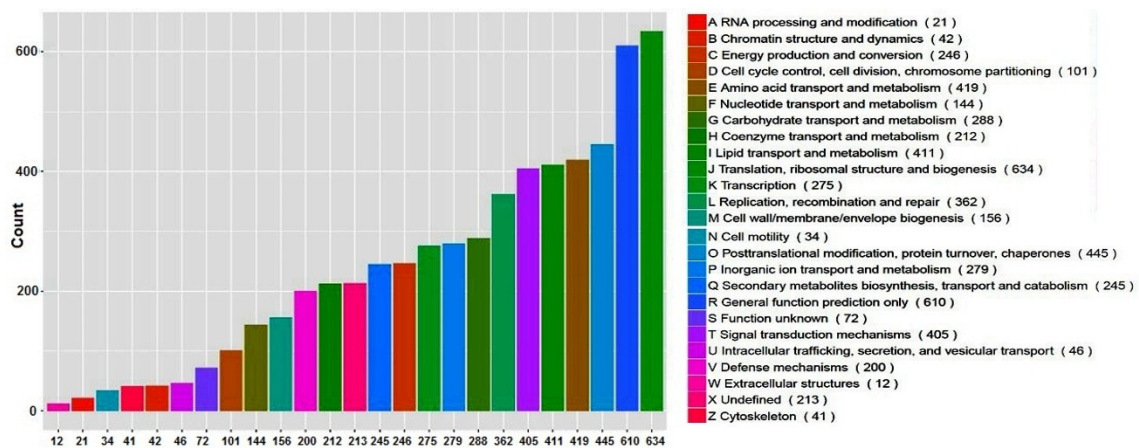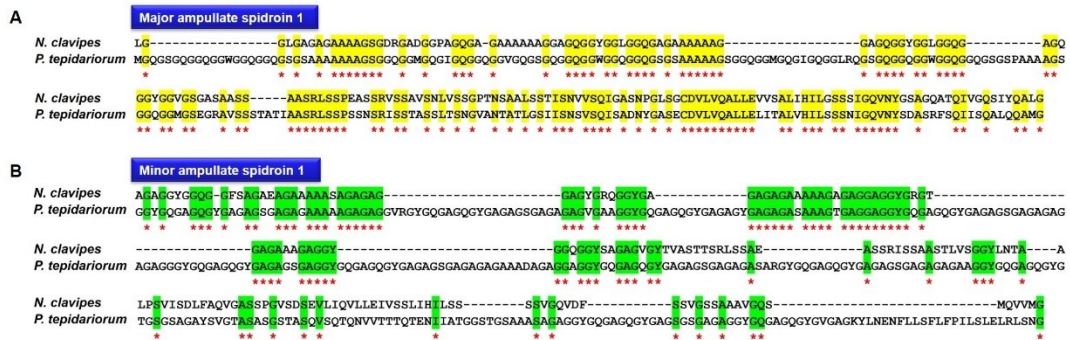



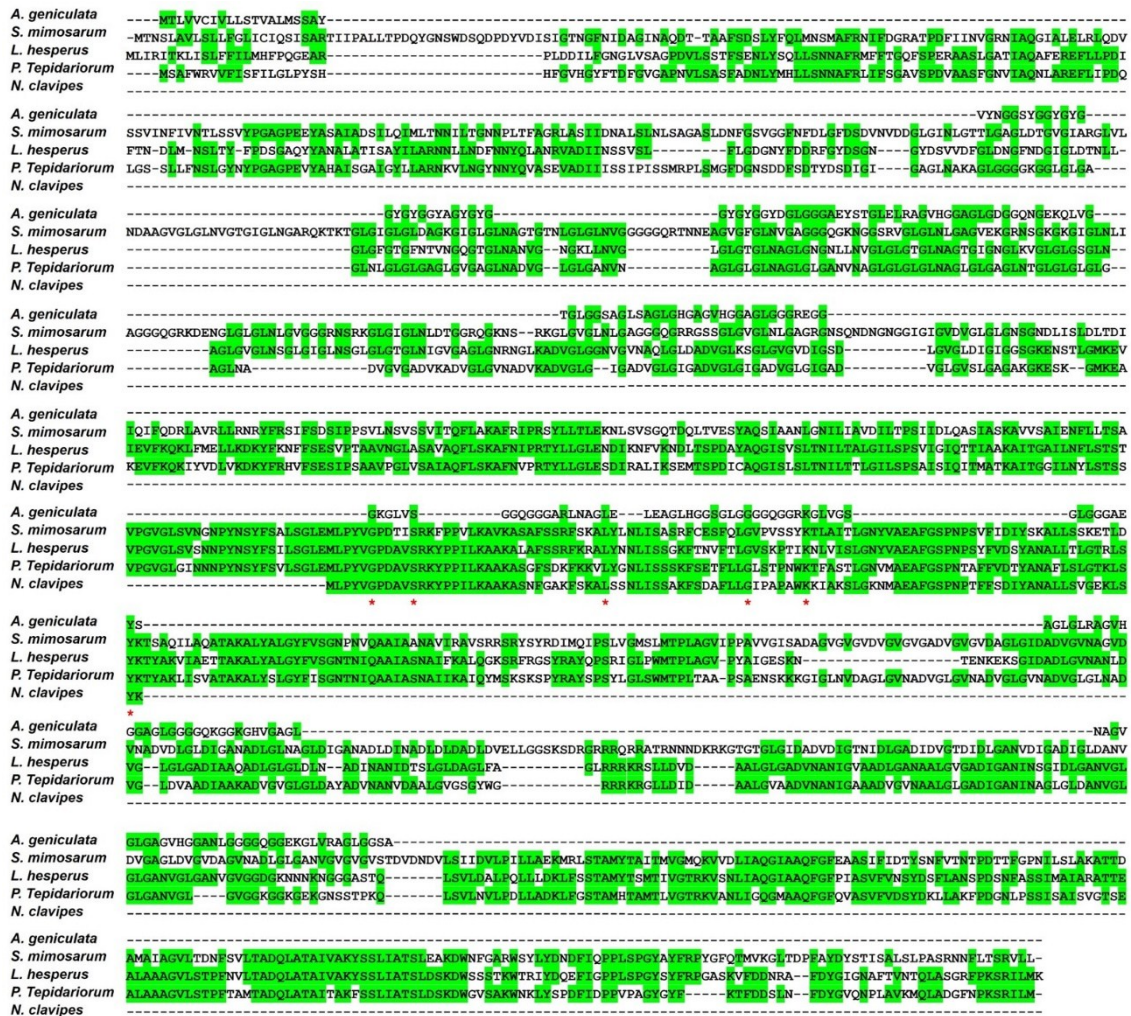

**Fig. S5.** Multiple sequence alignment viewer. Protein sequence (fragments) alignment of orthologous gene annotated as spidroin protein Sp-1339 that is shared among all five species of spiders analyzed. Conserved residues are colored in green; and highly conserved residues are marked with an asterisk.

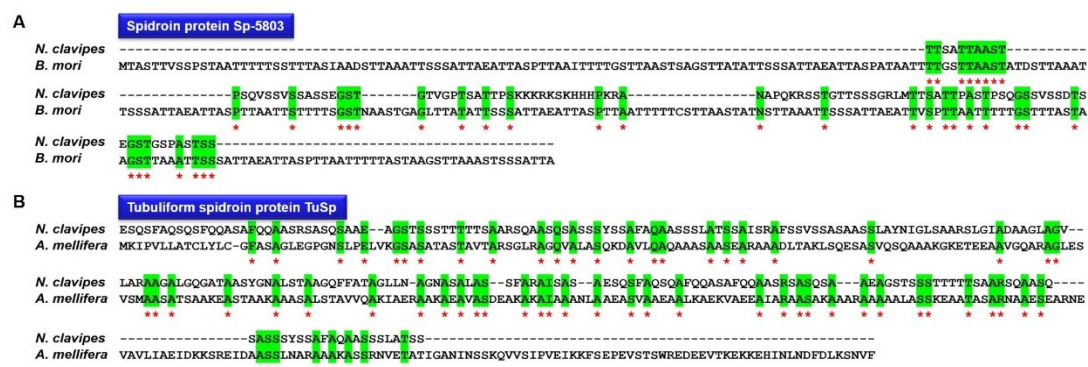

**Fig. S6.** Multiple sequence alignment viewer of protein sequences (fragments) of orthologous genes annotated as spidroins between *N. clavipes* silk-producing glands and two species of insects. (A) Spidroin protein Sp-5803 shared with *B. mori*; and (B) Tubuliform spidroin protein TuSp shared with *A. mellifera*. Conserved residues are colored in green; and highly conserved residues are marked with an asterisk.
