# Supplementary material for: A proteotranscriptomic study of silk-producing glands from the orb-weaving spiders
Source: Royal Society of Chemistry journal article supplement (doi:10.1039/c9mo00087a), 2019-06-25
Supplement: c9mo00087a2.xlsx [file c9mo00087a2.xlsx]

## Sheet: Cover page
	Supplementary Tables 1, 2, 3, 4, 5, 6, 7, 8 and 9
	A proteotranscriptomic study of silk-producing glands from the orb-weaving spiders
	José Roberto Aparecido dos Santos-Pintoa, Franciele Grego Estevesa, Fernando J. Sialanac, Milene Ferroa, Roman Smidakc, Lucaciu Calin Raresd, Thomas Nussbaumerd, Thomas Ratteid, Martin Bilbane, Mauricio Bacci Júniora, Mario Sergio Palmaa* and Gert Lubecb*
	aCenter of the Study of Social Insects, Department of Biology, Institute of Biosciences of Rio Claro, São Paulo State University, Rio Claro, SP, Brazil 13500; bParacelsus Medical University, A 5020 Salzburg, Austria; cDepartment of Pharmaceutical Chemistry, University of Vienna, 1090 Austria; dDivision of Computational System Biology, Department of Microbiology and Ecosystem Science, University o…
	# Supplementary Tables 1, 2 and 3 are showing all information from spider silk-producing glands transcriptome.
	# Supplementary Tables 4 and 5 are showing all information from gel-free bottom-up proteomic analysis for each silk-producing gland - major ampullate, minor ampullate, flagelliform, aggregate, tubuliform and aciniform.
	# Supplementary Table 6 (i-vi) is showing all information from shotgun proteomic analysis for each gland, the functional annotation of the silk gland proteins in the GO (cellular component, biological process and molecular function) and the complete list of functional groups.
	# Supplementary Tables 7, 8 and 9 are showing all information from comparative genomics analysis - comparison and annotation of orthologous clusters across multiple spider and insect species analyzed in the present study.
					Cover page						Page
	Supplementary Table 1. Spider silk-producing glands transcriptome. Transcripts lenght distribution for the coding sequences.										S1
	Supplementary Table 2. Nephila clavipes spider silk glands transcriptome assembly - non-redundant sequences.										S2
	Supplementary Table 3. Summary of transcripts encoding proteins homologous to spidroins.										S3
	Supplementary Table 4. Identified proteins in Nephila clavipes spider silk glands by gel-free bottom-up proteomic approach.										S4
	Supplementary Table 5. Identified spidroins in Nephila clavipes spider silk glands by gel-free bottom-up proteomic approach.										S5
	Supplementary Table 6. Identified proteins in Nephila clavipes spider silk glands by gel-free shotgun proteomic approach. Functional groups:										S6
					i) Spidroin proteins						S6 (i)
					ii) Transport of ions during silk fiber spinning						S6 (ii)
					iii) Folding / conformation and PTMs of spidroin						S6 (iii)
					iv) Silk protection against oxidative stress						S6 (iv)
					v) Fibrillar preservation of silk in the web						S6 (v)
					vi) Housekeeping proteins						S6 (vi)
	Supplementary Table 7. Protein annotation of 1927 shared orthologous clusters across multiple spider species - N. clavipes silk-producing glands,										S7
	A. geniculata, L. hesperus, P. tepidariorum, and S. mimosarum. These clusters were annotated by Blast2GO PRO against the taxa Araneae database.
	Supplementary Table 8. Protein annotation of 1678 shared orthologous clusters across N. clavipes silk-producing glands and three species of insects -										S8
	A. mellifera, C. floridanus, and B. mori. These clusters were annotated by Blast2GO PRO against the taxa Araneae database.
	Supplementary Table 9. Orthologous genes shared among five species of spiders - N. clavipes silk-producing glands, A. geniculata, L. hesperus,										S9
	P. tepidariorum, and S. mimosarum; and three species of insects - A. mellifera, C. floridanus, and B. mori.
	These orthologous presented protein sequences as spidroins, based on annotation of these clusters by Blast2GO PRO.

## Sheet: Table S1
Supplementary Table 1. Spider silk-producing glands transcriptome.
Transcripts lenght distribution for the coding sequences.
	Amount of contigs	Length (nt)	% total
0 </= x < 500	13.396	5 107 833	38.5
500 </= x < 1000	11.534	8 138 811	33.1
1000 </= x < 1500	4.946	6 000 489	14.2
1500 </= x < 2000	2.357	4 032 474	6.8
2000 < x	2.593	7 490 982	7.4
Σ	34.826	30 770 589	100

## Sheet: Table S2
Supplementary Table 2. Nephila clavipes spider silk glands transcriptome assembly - non-redundant sequences.
Transcript	Transcript_length	Transcript_cds	Transcript_aa	ORF_information	Pfam annotation	NCBI_match	NCBI_log (e-value)	read_count
TRINITY_DN10017_c0_g2_i1	type:internal	498	TTAAAAATTATGATGGAATTAGGAGATAGAAGTGCACAAGGCAGAGCCTGTGGAAATTTAGGAAATACCCATTATCTTCTGGGAAATTTTAATGAAGCCATAACTTATCATAATGAGAGGTTAAAAATTGCCAAGGAATTCAAAGATTTGGCAGCAGAAAGGAGAGCTCATAACAATTTAGGGAATGCTCATATATTTTTAGGTGAATTTGAAGTTGCTGCTGAGCATTATAAGAAAACATTATCTTTGGCCATTGAATTGAGAGACAAAGCTATTGAAGCTCAAGCTTACTACAGTTTAGGGAACACATACACATTACTTCATGACTATCCCACTGCCATAGAGTATCATCTAAGACATTTGAAAATTGCTCAAGAACTTAAAGACCGAATTGGGGAA…	LKIMMELGDRSAQGRACGNLGNTHYLLGNFNEAITYHNERLKIAKEFKDLAAERRAHNNLGNAHIFLGEFEVAAEHYKKTLSLAIELRDKAIEAQAYYSLGNTYTLLHDYPTAIEYHLRHLKIAQELKDRIGEGRAYWSLGNAHSAVGNHEQALHFANRHLEISKE	Tetratricopeptide_repeat|PF13176.4;Rapsyn_N-terminal_myristoylation_and_linker_region|PF10579.7;Tetratricopeptide_repeat|PF13424.4;Flagellar_FliJ_protein|PF02050.14;Tetratricopeptide_repeat|PF00515.26;Tetratricopeptide_repeat|PF07721.12;Tetratricopeptide_repeat|PF13431.4;Tetratricopeptide_repeat|PF13428.4;Tetratricopeptide_repeat|PF07719.15;Tetratricopeptide_repeat|PF13181.4;Tetratricopeptide_rep…	XP_393796.3	261.2	107
TRINITY_DN10019_c0_g2_i1	type:internal	552	CAGAATAACATGGAGGTGCAGTTTTTCCTTTTTTGCATCGCAGCCGCCATGGTTGTTGCGATTGCACAAGAAATGACCATTCCGGTTGGCGTGGACGGTAAGGACACGTTGACCACTATTAGGAACGTAGATGCAGATGGCAACTACGATGTCGGGTACAACGAGAACCAGTTAACCGGCGGCGCATCCTTTTACAGAGAAAGGGGCTTCACGAACGGAACCAGAACCGGATCATACGGTTACACCACCAGGAACGGTCTCATCCGGATCGTAACCTACGTCGCTGACGAGGATGGATACCGAGCGGAACTTCTCACTAACGAACCAGGCGTGAGTTCGGCGCAACCGGCTAATGTCACTGTTACCAAAGAGGTGGAACCGGATCCTGTGGCCCTTGCC…	QNNMEVQFFLFCIAAAMVVAIAQEMTIPVGVDGKDTLTTIRNVDADGNYDVGYNENQLTGGASFYRERGFTNGTRTGSYGYTTRNGLIRIVTYVADEDGYRAELLTNEPGVSSAQPANVTVTKEVEPDPVALALGPTGVPLQQSASSSVAYVSEGDPGRTLALGPTGVPLQQSASSSGAYMSES	Insect_cuticle_protein|PF00379.21	AAV80785.1	62	262
TRINITY_DN10027_c0_g2_i1	type:internal	618	GTTATCTTCTACTTGAAAAAGGTTCCAACCGAAGAAAATTACTGCTTCTATTTCCATGTACACAAAAATTATGATGTGGGAAACACACAGAGAAGTGTGGTAAAGGTTTATGACTATTACAATCCTGATGCAACATGTTCAGTGTTCTACAGTCCTACCAAAAACAGTGCATTACTTCGAACAATATGTGATGGTGGAGTGTGCCAATGTGCCGCAGGTGGATGTCCTCCACGAAAACCTTTTGAGATTGTTAAAACATTTGAAGCTGATGGAAAGGAAAGAGGACTAATTAATTATGCCTGCAACAAATTCGATTATGTTTGGAAAGGACATTTCATTAGTGAGAAGAAAGAAGGTGGATTTTTGAAATTAGGTTTTGTAGTTGAGGAAGTTATTAAA…	VIFYLKKVPTEENYCFYFHVHKNYDVGNTQRSVVKVYDYYNPDATCSVFYSPTKNSALLRTICDGGVCQCAAGGCPPRKPFEIVKTFEADGKERGLINYACNKFDYVWKGHFISEKKEGGFLKLGFVVEEVIKDGIESEELIEGCTRYLLLRDHCSPYLLEKTYLIMGKDGNKYTNEEEQIWYRYLLDQTSAVYMWSSPEKASRKR	YpjP-like_protein|PF14005.4;UNC-6/NTR/C345C_module|PF01759.19;A-macroglobulin_receptor|PF07677.12	AAH63289.1	72	534
TRINITY_DN10033_c0_g1_i1	type:internal	318	GAAGTAGTGTCGCGGTTCACAAGCTTCGCGTTGAAAGAGAACGTCGCTGATCGCATTAGAACCGGTTCATCCGCGCGAAGCGGCGTCTTGCCCGACATCTCCGATCTGAGTGCGTGCGTCCACTTCTCGCCTCACGACGGGCAGATCTGGCTGGCCGACCAAAGAGCCGTGCTTCTGAATCTGGACGCCATGGTTGCGCTGCGCCGCGAACTGATTGAGGCCAACGGCCCCCTGAAAGCCAGGCAAATTCTGTTTCGCATGGGGCATGCTGCGGGAACACGGGAAGCGCAGGTCGCGATGAAGGTTCGCATAGATCGC	EVVSRFTSFALKENVADRIRTGSSARSGVLPDISDLSACVHFSPHDGQIWLADQRAVLLNLDAMVALRRELIEANGPLKARQILFRMGHAAGTREAQVAMKVRIDR	Activator_of_aromatic_catabolism|PF06505.9	WP_011803674.1	76.3	44
TRINITY_DN10036_c0_g2_i1	type:internal	483	AAAAAGGGCTGTAAAAATGCAAAGAAACAAGAGAAATCAACATTTGATTTTAAAAAGTATAAAAAACGACATGTAGCTCTAAAATTTTTATATCTTGGATGGGATTATTGTGGATTCGCTGTGCAAACGCATACTGAAAAAACTATTGAAACACAATTATTCAATGCATTACTGAAGACTAAACTTTTGGAATCAAGGGAAACTTCCAATTATCATCGTTGTGGGCGTACTGATAAAGGTGTATCTGCATTTTCTCAAGTTATTTCTCTTGATCTTCGAAGCAATTTGCTTGAAGGCAAAGGTATTATTACACCAGAGGATTTTGCAGAAAACCAACATAATAATACAGTTTCAGATAAAGAAATTGACTATCCATCAATTTTAAATCGTGTTCTACCT…	KKGCKNAKKQEKSTFDFKKYKKRHVALKFLYLGWDYCGFAVQTHTEKTIETQLFNALLKTKLLESRETSNYHRCGRTDKGVSAFSQVISLDLRSNLLEGKGIITPEDFAENQHNNTVSDKEIDYPSILNRVLPEEIKVIAWAPVDTSFSARFDCKKRTDRK	NA	XP_001148378.1	173.7	244
TRINITY_DN1004_c0_g1_i1	type:3prime_partial	603	ATGGCTGCCACTGATCAAGATCGACCACCAGTCACGCAGCTGGAGTTCCGGCAGGCCATGCGTGACTTCACAACCATGTTCCCCGAGATGGACGCAGATGTGATTGAGGTTGTTCTGAGATCAAACAATGGAGCGGTGGATTCGACTATTGACCAGCTGTTAGCCATGAGCACAGACAATGAAAATGAGAGACTGAGAACAGAATTGGATGCTACAGAGAATGATGAGCTGCCCCCCTGTTACTCCCCTTCTACCCCACCTCCTTCTTACAACCAAGCAGTGCCCTTTGCATTAGCTGCAGAGCAAGGTGCTCCAGCAGAGAAGACAGTTACTAAAATTCCAGAGGAAACTGAAACGGCACAGCCTGCAGCCAGATTACCAGATATTGTAGAGAATGGA…	MAATDQDRPPVTQLEFRQAMRDFTTMFPEMDADVIEVVLRSNNGAVDSTIDQLLAMSTDNENERLRTELDATENDELPPCYSPSTPPPSYNQAVPFALAAEQGAPAEKTVTKIPEETETAQPAARLPDIVENGEASLAAAAAAAATAEAEEDAENSTALSVAKGWKPPLLGELPPTFLKISGSPVGKPPPKKVTILSSTIL	CUE_domain|PF02845.14;Peroxidase,_family_2|PF01328.15;DMRTA_motif|PF03474.12;Transmembrane_52|PF14979.4	XP_001663565.1	35.8	358
TRINITY_DN10060_c0_g1_i1	type:3prime_partial	381	ATGGCCCAAGCCCATGTCGAAAGCATATCGGAAGATATCCAAAATGATGACTTTCTTGGAAACAGTTCCACTGAAAAGGAAAAAGACTATTCGCTTTATTCTTCAGTGGAGAATTCTCCTCTATTTGATAGGGAGAGTAGTCTTCGATATAGTGCAAGCTCTAAGGATGAATTCTGGGATGCTTTGAGCTCCAATTATGATTACCTCATGGATGATGGGCTTATTGCCACTTGCAGAGAGGCAAGCAGTGACTTGTCTTTGGATGATGAAAGTGAAATGTCAGAAGCTTGTTGCTGGACCTTTACTCGCTTCATTGAACAGTTCAAGTGGCTTCATGATCTACTACACAACTTGCAAGTGGCTAGGGAGGATGACAGCCCA	MAQAHVESISEDIQNDDFLGNSSTEKEKDYSLYSSVENSPLFDRESSLRYSASSKDEFWDALSSNYDYLMDDGLIATCREASSDLSLDDESEMSEACCWTFTRFIEQFKWLHDLLHNLQVAREDDSP	NA	NA	NA	72
TRINITY_DN10067_c0_g1_i1	type:complete	390	ATGTCACGAAGTCTGGGTGCAGCTACGGTTCGTTTGCTGGAAAAATCTCGAAGAATACCTACGAAAGCTGCATTAGTTTTAACCCCTGCTGCTGTGAACCAAGTTAAAAAACTGTTGAAGCAGAAACCCGAAGCGATTGGACTGAAAATTAGCGTTTCTCAACGAGGTTGCAACGGACTAAGCTATTCTCTGGACTATGTCAGTGAAAAAGGCAAATTTGATGAAATCGTGTCCCAGGATGGTGTGAAAATCCTCATAGATATGAAAGCTCAATTGACTCTTCTAGGAACCGAAATGGACTTCCAAGAAAGTGCTTTAGCGAGTGAATTCGTTTTTAACAATCCGAATATCAAAGGAACTTGTGGCTGTGGAGAGAGCTTTACTATATGA	MSRSLGAATVRLLEKSRRIPTKAALVLTPAAVNQVKKLLKQKPEAIGLKISVSQRGCNGLSYSLDYVSEKGKFDEIVSQDGVKILIDMKAQLTLLGTEMDFQESALASEFVFNNPNIKGTCGCGESFTI*	Protein_of_unknown_function,_DUF|PF04214.11;Iron-sulphur_cluster_biosynthesis|PF01521.18;Protein_of_unknown_function_(DUF3853)|PF12964.5	CAD39021.1	174.9	18381
TRINITY_DN10083_c0_g1_i1	type:internal	324	TGCGACCTTAAACCTCATGTAATTCTGCTAAATAGATTACGAACAGATTTGTTCTTATTTAATGAAAACGGAATGGAGTGGATGCTTCCACCAAATTCCATAGCTATACCTTCTGAACCTCATGAAAGTTTCCAACTCAGTATTCTTGAACAAGGAGAATTCTTTTATAGTTCAAACTTAACAGTCGAAGAAAATTGTACTGAAGAGTCTCCGACTGCAAGGGCTGATATGGATGTTGCCTCCTTCTTTTGTAATACTGCTCAAAAAATACCTCAAAATGGCTCAATTAATGTATTGATAAAAATGAAAATGACTAAGCAAAAG	CDLKPHVILLNRLRTDLFLFNENGMEWMLPPNSIAIPSEPHESFQLSILEQGEFFYSSNLTVEENCTEESPTARADMDVASFFCNTAQKIPQNGSINVLIKMKMTKQK	NA	NA	NA	147
TRINITY_DN10084_c0_g1_i1	type:5prime_partial	444	CTTGCCTCAGAATTCAATTTCCAGTGCCGTGAATCCAAACTGTGTCGTAAGGACTCGATACACTGTGAAGAGGCCAACGGCAAGCAGTGGTGCTGTCCAAAAACTACAGTATTTTGCAATGACGAAACCAACAAATGCCATCCTCTGGTCTCTAATGTTCCCCTAGTTTTGCTTAGACCCAGTATAAAAAAGTCAGAATATTTTACTGCTCTGGAGAAGCTATCTTTTAATGTCGAATCGGATCCAATGAAGAATAAGCAAATACTGAGTCGATCACTAAATTATCTCTGCCAACCTATTGAGAAAGGTAAGAGGTATACTAAACCATCACGCGTTAATTCCACTTGGTATTTATCAGATTGGGATACAGATATTTACTGCCCCGGAAGAAAGCAGAGA…	LASEFNFQCRESKLCRKDSIHCEEANGKQWCCPKTTVFCNDETNKCHPLVSNVPLVLLRPSIKKSEYFTALEKLSFNVESDPMKNKQILSRSLNYLCQPIEKGKRYTKPSRVNSTWYLSDWDTDIYCPGRKQRCPPENTCCLIGKDV*	NA	NA	NA	118
TRINITY_DN10107_c0_g2_i1	type:5prime_partial	663	AAAGAATCTTCTCTGACGCGAGAAGATGTCGAAGTGATAATTGAAGATCTGATTGGAGGCCATTCCGTTTTAGGAAACTTGTGGTTGTGGGGACTTTATCTTTTGGCAGCAAATCCTGAAGTCAGAAAGAACATTAGAGAAGAAGTAGCCAGAGTAACGTGTGGTGTAAGGGCTCCTAGCATGGAAGACAGGAAAAGTATGCCCTACACCGAAGCTACCACTTTGGAACTTCTTAGAGTCATTGCATCTCCTATCATTCCACATGTAGCAACTACAAATACAAGCATTAATGGTTTTAAAATTGAGAAAGATTCAATGGTCATGTTCAACACATATGATATCAACATGGATCCTCAATTATGGAATGAACCAAGAAAATTCGAACCTTTAAGGTTTGTG…	KESSLTREDVEVIIEDLIGGHSVLGNLWLWGLYLLAANPEVRKNIREEVARVTCGVRAPSMEDRKSMPYTEATTLELLRVIASPIIPHVATTNTSINGFKIEKDSMVMFNTYDINMDPQLWNEPRKFEPLRFVNSSGNVFKPDYFIPFGAGKRTCLGDGLVKATLFLGLSTLLQNFDITLPEGFPEPDMYDIPGLVVPRSEIRLVFRRLETEQSTMICMP*	Cytochrome_P450|PF00067.20	XP_974280.1	156.8	166
TRINITY_DN10110_c0_g1_i1	type:3prime_partial	330	ATGTGTGCAATGAAACAACACAAAAGGGAGTTACCGGAAGATGGATGTTTAAAGCCTCTTTCATCTTCCAAAACTAGTACTCCATGTAATATAATGATAATTAAAGTACCTGATGAAATGAAAGGCCCAGGTGAAATGACATATCAGCTAGCCACCCTTGATAGAAGTAAAGAAGGCATAGAACTTACTGGCAATAAGTATATGGATAAATTAATCCCTAATTTACCGAAAGTGAGTGTTTTTAATGAAAGATCAGAATTGAAAGATGTCACAGATACCCCTACCCCATATTTTAGAAAACGACGACTAAAAATAGATCGGAAGAGCGTC	MCAMKQHKRELPEDGCLKPLSSSKTSTPCNIMIIKVPDEMKGPGEMTYQLATLDRSKEGIELTGNKYMDKLIPNLPKVSVFNERSELKDVTDTPTPYFRKRRLKIDRKSV	NA	NA	NA	181
TRINITY_DN10127_c0_g1_i1	type:5prime_partial	576	CCTTCTGCTAAAAGCATGCAACGTCTGACAATGAATGGGGTCATCAGTTTGATTTTATTTATGTGCTTCATGGGAGCTTTTGCTCACCAACAGCCATATCAACCTCCTCCTCAACCGGCTTACCAACAGCAAGTGCCACAACATGCACATCATCAAGCAGCAGGTATACCTCAAGGAACTCAACCTCCTCAAGGTCATCAGGCTAATTTACTGAGAGATAAAACTCATGTTCAAGATAGAGAACATATTAAAGAGCATTTACAAGGAGTGGTGAATCAGCCTGATGTTAGTAAAATGACAGAAGAAGAGCTTCAGTTCCATTATTTTAAAATGCATGATAATGATGACAATAACAAACTTGATGGTTGTGAACTAATTAAATCTGTTCTTCATTGGCAT…	PSAKSMQRLTMNGVISLILFMCFMGAFAHQQPYQPPPQPAYQQQVPQHAHHQAAGIPQGTQPPQGHQANLLRDKTHVQDREHIKEHLQGVVNQPDVSKMTEEELQFHYFKMHDNDDNNKLDGCELIKSVLHWHVEESNAMGANAPEQGTTKIFQDNELALMIDPILDMDDRNKDGFIDYPEFVNAQKSRGF*	EF-hand_domain_pair|PF13833.4;EF_hand|PF00036.30;Periplasmic_sensor_domain_found_in_signal_transduction_proteins|PF17149.2;EF-hand_domain_pair|PF13499.4;EF-hand_domain|PF13405.4;EF_hand|PF13202.4	XP_001648327.1	159.1	15918
TRINITY_DN1012_c0_g1_i1	type:internal	378	CCAACTCTACGTTCCATCACTTTGAGAGATCCAGAACGCCTCAAGAAATTCATTCGTTTCCATGTCAGCCCTCAAGTTCTTAACTGGAACTCTGTGCATGACAACTCTTTCATGCCTTCTTTGTTGCCTAGAAAGAGAATACGATGCAACATATATGCCAAAAGAAAGCCTGCTATCTTGACAGTATCCGGGTGTCGAGTGACAGCTATCCGGAAACTAGCACCGGACACAAACGTGACCGTGGCAGTCATTGACGACGTCATGACTCCTCCTCCCGGTGACCTGCCTCTCACGGTGGCCAAGACCCCGATGCTCAAGAATTTCACCAAAATCCTAAAAGTTTCTGGAATGGATAGTATGATAACAAGCGATGGTCCC	PTLRSITLRDPERLKKFIRFHVSPQVLNWNSVHDNSFMPSLLPRKRIRCNIYAKRKPAILTVSGCRVTAIRKLAPDTNVTVAVIDDVMTPPPGDLPLTVAKTPMLKNFTKILKVSGMDSMITSDGP	Fasciclin_domain|PF02469.20;Protein_of_unknown_function_(DUF3572)|PF12096.6	NA	NA	131
TRINITY_DN10132_c0_g1_i1	type:internal	381	AATATTGAAACATTTAGAAAATTAATAAGCAGAGTTCGTTGTCCACCTAGTGTGTTCCATGTTTTTGCCTTTAGTGGTCATCTAGCTGTTCCTCAAACACCACTTCACAAGCAGAAAGAAAAAAATGCAACACTTAAAGTTATAGCAAAAAAGACTCTTTTAAAAACTGCCATGAAAGCAGGGTTTAAACCTAAACCTTCATCAAGAAAACAGAAATATGTTATTCAAGGCCCTCATGATTCCAGAACCTTACCAAGTCCTGGTCGAACACCTTCTATTGGATTTGATAGTGAATCAGATCGACCATCTTCATTATATGAGGATGATTTGTCAATGATTGAAGAAGGAGATTTAACTATATCAACTCCTCACATTCCAACC	NIETFRKLISRVRCPPSVFHVFAFSGHLAVPQTPLHKQKEKNATLKVIAKKTLLKTAMKAGFKPKPSSRKQKYVIQGPHDSRTLPSPGRTPSIGFDSESDRPSSLYEDDLSMIEEGDLTISTPHIPT	NA	XP_001657392.1	76.6	266
TRINITY_DN10186_c0_g2_i1	type:internal	792	GGAGAAACTGGTTTGATCACAGAGAAAGACTTATTAAAATTACACCCAAAATTAAAAGGAGACAGAGGTGAACCCGGACCTCCTGGGTTACCTGGTCCTGCTGGACCTCAAGGACAAAAGGGTGAATGCATTTTTCTTCCTTCTCGTCCTGGCCTCCTTGGAGGAAATTCTGAGATATGGAATGAAGGCGATTTTGGTTCAGGGGATGATCAGGGTCCAAAAGAATGGCTTCCAGGTATTCTGCATCAAGGATCTGCAGGCGGGCCTTGCGTGTGTAACATATCTTTAAAGCAGTTAGAAAACATTCATGGTATTAGAGGAGCCGATGGTTTACCTGGTGCGAAAGGAGAACCCGGTGCCCCAGGACTACCTGGACCACCCGGAATAGGACTGCCCGGC…	GETGLITEKDLLKLHPKLKGDRGEPGPPGLPGPAGPQGQKGECIFLPSRPGLLGGNSEIWNEGDFGSGDDQGPKEWLPGILHQGSAGGPCVCNISLKQLENIHGIRGADGLPGAKGEPGAPGLPGPPGIGLPGSDGPKGDEGQVGMPGPQGQKGEPGVDGIPGSSGPRGMPGPPGPPGLANNHAPFDLDGAYGSGLYPSSGDGPFGPYVGRPGVPGVQGPPGLPGPPGIRGERGYLGEKGERGEAGPKGEKGNQVILSAFCITE	Collagen_triple_helix_repeat_(20_copies)|PF01391.16	EAX10909.1	136.3	337
TRINITY_DN10201_c0_g1_i1	type:complete	1125	ATGGAAGGAAAATCTATTCAATGCAAAGCTGCTGTTGCTTGGGAGCCAAAAAAGCCTTTATCGATTGAAACAATTGAAGTAGCGCCTCCTAAAGCTGGAGAAGTCAGAATCAAAATTGTTGCAACAGCAGTTTGCCATACTGATGCCTATACATTAGATGGCTTGGATCCAGAAGGTGTATTTCCTTGCATTCTTGGTCATGAGGGAGGAGGAATAGTTGAAAGTGTAGGAGAGGGTGTTACGTCTGTCCAGCCTGGTGATCATGTAATACCCTTATATATCCCACAATGCAGAGATTGCAAATTCTGTAGCAGCTCCAAAACTAATTTATGCTCAAAAATCAGAGGTACACAAGGAAAAGGTGTTATGCCTGATGGTACAAGTCGATTTACCTGTAAG…	MEGKSIQCKAAVAWEPKKPLSIETIEVAPPKAGEVRIKIVATAVCHTDAYTLDGLDPEGVFPCILGHEGGGIVESVGEGVTSVQPGDHVIPLYIPQCRDCKFCSSSKTNLCSKIRGTQGKGVMPDGTSRFTCKGQTIYHFMGTSTFSEYTVVAEISVVKVNSKAQLNKVCLLGCGIPTGYGAALNTANVEPKSNVAIWGLGTVGLAVAMGCKERGASRIIGVDTNPEKFELARKFGCTEFINPIDHQKPIQEVLIDLTDGGLDYTFECIGNVNTMRAALESCHKGWGQSVIIGVAGSGQEISTRPFQLVTGRVWKGSAFGGWKSRDSVPKLVDQYMNGKLMIDEFVTHEFPFQEINEAFHLLHSGKTLRSVLNF*	Zinc-binding_dehydrogenase|PF13602.4;TrkA-N_domain|PF02254.16;UDP-glucose/GDP-mannose_dehydrogenase_family,_NAD_binding_domain|PF03721.12;Glucose_dehydrogenase_C-terminus|PF16912.3;Alcohol_dehydrogenase_GroES-like_domain|PF08240.10;Zinc-binding_dehydrogenase|PF00107.24;D-isomer_specific_2-hydroxyacid_dehydrogenase,_NAD_binding_domain|PF02826.17	AAF73255.1	607.8	28887
TRINITY_DN1021_c0_g1_i1	type:3prime_partial	1131	ATGACGAACATGTTAGAGGCAGTCTTCAATTGCGATTTGAATAAGTTGAAAGCCCTCTTAAATGAGAAAAATGTAAACTATGAAATACCAGGAACTGAGGGCTGTACCCCACTTCATCTTGTGGTTGGAATAGAAAATGTTAGTGGAAAAGAAGCTGTGCTATCTTACTTATTGGAAACAGGGGCTAATCCTAATGCTAGATCATTTGATGATTTAACTCCAGTTCATATTGCTGCAATGTGGAATAACTGTTCTGAATTAGAAAAACTTTTGCAAAATGGTGGAAATCCATGGCTTACAGATAATGAAAACAAAAACTCATTTGACTTAGCAATTGACAATTCTGCTTATGAAGCTTATCAGTTACTTCATCGATATCTAGCCGAAGACAAATTAAAC…	MTNMLEAVFNCDLNKLKALLNEKNVNYEIPGTEGCTPLHLVVGIENVSGKEAVLSYLLETGANPNARSFDDLTPVHIAAMWNNCSELEKLLQNGGNPWLTDNENKNSFDLAIDNSAYEAYQLLHRYLAEDKLNFRHKSSKASDKFMECEEHMYKKPLDEDFVNSSFFSAKEYFPVLFSSAEDESGDFFHNVSRILKKKLLKNQNPDQDLTQKNLTVNINDKLTTENKGLDLLSDSDTSYYSVCSNKINQEKTHNNAAIFSSDEIETTATSENKIFSGEEGSERIVETDIESGISLIEKCIASDKYSYSKVYESYCECIINDWKTCQSRSSSCSTWSNCSLHSTFFIAVPDEYKMLSNSKIHQELKLRGDDPGPVTDS	Ankyrin_repeat|PF13606.4;Ankyrin_repeats_(many_copies)|PF13637.4;Ankyrin_repeat|PF00023.28;LEM_domain|PF03020.13;Ankyrin_repeats_(many_copies)|PF13857.4;Ankyrin_repeats_(3_copies)|PF12796.5	AAH30436.1	63.2	639
TRINITY_DN1023_c0_g1_i1	type:complete	723	ATGTCTTGGATATGGGCAAGCATTTTAATTGGTTTCATCGAATACATTGATGGAGTGTTTTCTCATGATTGCAACTCCAGTGAGTCCGTGGCCTGCAGACGGGAGTTTGAGAACCTGAAGTCGTTTCAAGAAAGATATCAGTACACAAGTGACAACCAAACTCTCTCAGAAATGTGTTGGAAACAGCTTCTAGCTTTAAAATGCGTGAATTCATTTGCAGAAGAGTGCCTCCCGGAAGACGAGCAAGCGGTCTTCAAAACGTTGATCAAGGGCTCTGACAAATTTTTTGATTACTTTTGCGTCGAGAACAGTTCACTAAGAAAAGAATACCTGAGGCAATCGTCCTGCCTGAAGACCATCTCTTCTGAGCTGGACGAATGCACCGCCGAATACCTGGAA…	MSWIWASILIGFIEYIDGVFSHDCNSSESVACRREFENLKSFQERYQYTSDNQTLSEMCWKQLLALKCVNSFAEECLPEDEQAVFKTLIKGSDKFFDYFCVENSSLRKEYLRQSSCLKTISSELDECTAEYLESQKLLDSSASPKTLKQSTCCIYFENIRCSSNATSEACGQEAGQLVSELWRLLGGTYLNQLCEPYFEYDSESCTPASKSIRLTPRTNILGVLFPFLFGAASRYLRQDG*	NA	NA	NA	297
TRINITY_DN10267_c0_g2_i1	type:internal	528	CTGTCAAGCGCGTGGCAGGCCGCTTTGGGTGCCACCTCGAACATGGACAAAGAGAAGCAGGAGCGGAAACGGGTGGTGCGGAAGCCCATTAAGGTAGTTGAGCGCCCTGAACGCGTCCTCTTCTGCCTCGGCACCAAAAATCCTATTCGCAGCCTCTGCATCACCATCGTCGAATACAAAGCTTTTGAATATCTTATACTTTTAACCATTTTTGCCAATTGTATAGCCCTAGCTGTCTTCACCCCTTTTCCTTTTGGGGACTCCAATGCAGTAAACGCCACATTGGAAAAAGTAGAATATATATTTTTGGTGATCTTCACCCTAGAGTGCGTAATGAAGATCATTGCGTACGGTTTTATACTCCATCCTGGTGCTTATCTACGGAACACATGGAATCTT…	LSSAWQAALGATSNMDKEKQERKRVVRKPIKVVERPERVLFCLGTKNPIRSLCITIVEYKAFEYLILLTIFANCIALAVFTPFPFGDSNAVNATLEKVEYIFLVIFTLECVMKIIAYGFILHPGAYLRNTWNLLDFIIVVIGVVSTALSNLMKDGFDVKALRAFRVLRPLRLVSGV	Protein_of_unknown_function_(DUF2618)|PF10940.6;Protein_of_unknown_function_(DUF2975)|PF11188.6;Polycystin_cation_channel|PF08016.10;Ion_transport_protein|PF00520.29	XP_001661548.1	239.6	79
TRINITY_DN10287_c0_g1_i1	type:complete	417	ATGGCCCTTTCCTACATTGTGTCTCTACTTCTGGTATTACAGATAATTGCCGCTGCTCCAACCGACACTACTGAAGAGACGAATCCTTCGGATTTCACAACTTTCAGCAATGAAACACTACTCGATTACAGCACTGAAATTACCACTGTACCTCCACAAAATTTTACTTCTGACAATGTAACTGCCGACCTTATTGTGGATATGGATGTCAGTGAATATACTAACTCTACAAGTAATGAAACGATAGTGGAGACAGTATCGTATAATCCGGAAACTGAAGCCACTACTGTAGAGCCTCCTCCTGCCAAGAAAATTTCCAACGTAGAAAATACAGCCTTCCTGATTCAACCTAGCATGTTGGCTGTAATTCTTCCGATTTGTGTTAAACTTCTGACGTCC…	MALSYIVSLLLVLQIIAAAPTDTTEETNPSDFTTFSNETLLDYSTEITTVPPQNFTSDNVTADLIVDMDVSEYTNSTSNETIVETVSYNPETEATTVEPPPAKKISNVENTAFLIQPSMLAVILPICVKLLTSRNRCL*	NA	NA	NA	16597
TRINITY_DN102_c0_g1_i1	type:internal	675	GCTTTAGTTGCAACCTGGTTTACTCGAAAACTAGGCTATGTTAACATAATTATTATTGCGTTTGCTGCATATGCAGTGAGATTTTTTGGATATGCATTCGCTCAGGATGCATACTTTTGCCTCATATTTGAGATGATGGAAAACTTTACGGTAACGCTGCTGACAGTGGGTGTCACAATGTACTGTACAGAACTTTTATCACTTGAAATGTTAACTACTGTTATGACGCTATGGAACGGATTGCATGTTATTTCAGGACGAGCGTTTGGATCTCTTCTTGGTGGATTTCTTGTTAATAACTTTGGATTTCGCCAAACATTTAAATTCTTTGCCTATGGATGTATCGGCTTTGGATCATTTTACACATTGATGTATATAACTTGGCTTCGACAATGGCGT…	ALVATWFTRKLGYVNIIIIAFAAYAVRFFGYAFAQDAYFCLIFEMMENFTVTLLTVGVTMYCTELLSLEMLTTVMTLWNGLHVISGRAFGSLLGGFLVNNFGFRQTFKFFAYGCIGFGSFYTLMYITWLRQWRKNHRKASESDRRTNSSVSDEKEDEAMKNQAFSSFSLHCSFDSPGLVTYTPEKEDELRPRALSHIPARASNSFKPGVIPRHAVSFTEGRFQRP	Organic_Anion_Transporter_Polypeptide_(OATP)_family|PF03137.18;Transmembrane_secretion_effector|PF05977.11;MFS_1_like_family|PF12832.5;Major_Facilitator_Superfamily|PF07690.14;LacY_proton/sugar_symporter|PF01306.17	NA	NA	230
TRINITY_DN10300_c0_g2_i1	type:internal	324	TTACCTGAAGCTATGGTATGCTATCTAGAAAACCATGGTGCTGAAAAGTTTGCTCAGATATTTTTGGGTGAATATGATACTCCAGAAGCCATATGGAGTAATGAAATGAGGAGATTGATGATTGAAAAAATAGCTTCACATATTGCAGAATTTACTCCTCGACTTCGTTCTAATACTAAAGCTTTGTACCAATATTGTGCAATACCTGTTGTACAATATCCTCAATTGGAGAATGAACTGTTTTGCAACATATACTACCTACGTCATTTATGTGATGTTCAAAAATTCCCAGAATGGCCAATAAGAAACCCAGTGAAGTTACTG	LPEAMVCYLENHGAEKFAQIFLGEYDTPEAIWSNEMRRLMIEKIASHIAEFTPRLRSNTKALYQYCAIPVVQYPQLENELFCNIYYLRHLCDVQKFPEWPIRNPVKLL	NA	XP_418787.2	198	96
TRINITY_DN10304_c0_g1_i1	type:internal	456	CACACTGAGCAGCTTGTCCAAGATCAGTATGGTAACTATGTTGTTCAGCATGTGCTAGAGCATGGATGCCAAGAGGATAAGAGTAAAATAGTGAATGTTGTTAGAGGAAAAGTATTGAACTTGTCTCAACATAAATTTGCTAGTAATGTTGTGGAAAAATGTGTTACTCATGCATCTCGAGCTGAACGAGCTATTCTCATTGAAGAAGTTTGCACCTTTACTGATGGGCCTCACAGTGCCTTATATTCTATGATGAAGGACCAGTATGCCAATTATGTAGTGCAAAGAATGATAGAGGTTGCAGAACCTCCGCAGAGAAAACTGCTACTGCACAAGATCCGTCCTCATGTCACATCTCTACGCAAATACACTTATGGCAAGCATATTCTCGCCAAATTA…	HTEQLVQDQYGNYVVQHVLEHGCQEDKSKIVNVVRGKVLNLSQHKFASNVVEKCVTHASRAERAILIEEVCTFTDGPHSALYSMMKDQYANYVVQRMIEVAEPPQRKLLLHKIRPHVTSLRKYTYGKHILAKLEKYLMKNNELGPIGAPSNG	RNA_polymerase_beta_subunit|PF04563.13;CPL_(NUC119)_domain|PF08144.9;Pumilio-family_RNA_binding_repeat|PF00806.17	XP_004028947.1	260.4	166
TRINITY_DN10334_c0_g1_i1	type:5prime_partial	330	GATCTCGATTGGAAAAAAATTCTACAATGGCCTTTAGCTCGTGTAATAAAATTGATTCCAGGGAAGGATGGACTGGTGAGAACTGTTAAACTCAAGACTCAATCTTGTACTTTAACTCGTCCAATTCAACATGTGTTTCAGCTTGAGGTGAGTGATAATGATATAACAAATCCACCGCTCCAAAAGGTTCAACAGACTGATTCGTCCTTGAGCTGTCCAAATCCTGATACTTTGAAAGCTACTGAGAAACTTCAGGTGACCAGATGTGGTCGTCCATTGAGGAAACCCGACCGGTTGAACTTGTTGACTTTATCTGATGCTTTTGACTAA	DLDWKKILQWPLARVIKLIPGKDGLVRTVKLKTQSCTLTRPIQHVFQLEVSDNDITNPPLQKVQQTDSSLSCPNPDTLKATEKLQVTRCGRPLRKPDRLNLLTLSDAFD*	NA	NA	NA	112
TRINITY_DN10338_c0_g1_i1	type:5prime_partial	558	ATCATTGATAGCAATAAAGCTGAAATAGGCATTTTGTTGCTTAGTGGATCAGAAGCACTGGTAGAAAATAGTGTCATTTGCAATTCCAGTGAGGATGGTATACAAATGAGGTCACTGAGCTCTTTGAAAATGAAATCATCTAAAATTATGTTTTCATCAAGACATGGTATCCAAATAGATGCAGAATGTGGACCATCACCAGATATTTTTACTGACATCTATATCAATAGCTCTCACATCACTGAGAATTGTGGATATGGTATATATCTGAACAATGTACCAATAACTGAAATTTCTCTGGAAAGACCCATTGGAGATTTTAATATATTAGGATTGTTTCCATGGTTAAAATACCAAATAGATGATACTGTAATGGAGCATAATGGCTTAAATGGTGTT…	IIDSNKAEIGILLLSGSEALVENSVICNSSEDGIQMRSLSSLKMKSSKIMFSSRHGIQIDAECGPSPDIFTDIYINSSHITENCGYGIYLNNVPITEISLERPIGDFNILGLFPWLKYQIDDTVMEHNGLNGVGISSCCKNRNNSISDSTLQDLPNCTNTEDLNYSALSDLLNEVNLSISNLDSN*	Periplasmic_copper-binding_protein_(NosD)|PF05048.11;Right_handed_beta_helix_region|PF13229.4	NA	NA	239
TRINITY_DN10347_c0_g1_i1	type:internal	408	AAATGTATGAGAACATCAACTACAATGAGCAGCCGGACGCTGGAAGGAGAACGAAAGGTTCAGCAAAGAGGTAGTTTCTTTTCAGACTCATTACCGACGAATCGATCAAACAGTGAATGCTGCATGGACAAGCAATCAAAAATTGGATGCCAACAAGTAGGACCTTCAGTGCATCATAAGGACAATATCGCAAGTAAACTATTAAAAGGTTCGATGCAGAATTCAGGTAGTGTTACGGACAAAGTGCCCAAGGAAATGACATCATATAATGAAGAGCACGAAAGAACGAACTCAGGCAGCTCCTCTACATCCCATACATGGTTTATTAAGAAATTCTTGAGAGGACTAACTTCCAAAGAAACTGATACGGATAGATGCTCAAGAATACCGATTCCAACA…	KCMRTSTTMSSRTLEGERKVQQRGSFFSDSLPTNRSNSECCMDKQSKIGCQQVGPSVHHKDNIASKLLKGSMQNSGSVTDKVPKEMTSYNEEHERTNSGSSSTSHTWFIKKFLRGLTSKETDTDRCSRIPIPTDCK	NA	NA	NA	66
TRINITY_DN10374_c0_g1_i1	type:complete	327	ATGTTCAACATTTCTGACCTGCCATCGGGATTATGTCATGTAAAAATAACTATACGAAAAAAGGTCATGAGTCGAGTATTTATATTAGCTGTCGTCTGTTTTACTTTGACAGCTGTTGTGCTTATGAAAACAGCGTTACAACGTTACCATGAGGTCAGAAAATACTTCCGACTTCAAGAATATGCATCTGAAGTGCGCGATATTTCTGAATCTCTGAAAACTCTCGAAGCGAATTCTTTGACATTGGAGGATGAAGTGCAACAGTTAAAAAAAATAGCTCAAGAAGCTTTACATCAGTTTAATTCTAGTTTAGTAACACCCACATGA	MFNISDLPSGLCHVKITIRKKVMSRVFILAVVCFTLTAVVLMKTALQRYHEVRKYFRLQEYASEVRDISESLKTLEANSLTLEDEVQQLKKIAQEALHQFNSSLVTPT*	Fungal_N-terminal_domain_of_STAND_proteins|PF17111.3;Alternative_WD40_repeat_motif|PF14077.4;AI-2E_family_transporter|PF01594.14;HAUS_augmin-like_complex_subunit_3|PF14932.4;Protein_of_unknown_function_(DUF1270)|PF06900.9;Protein_of_unknown_function_(DUF3623)|PF12291.6;Domain_of_unknown_function_(DUF4179)|PF13786.4;DASH_complex_subunit_Dam1|PF08653.8;IncA_protein|PF04156.12	NA	NA	593
TRINITY_DN1037_c0_g2_i1	type:5prime_partial	417	CCTGGGGTGGCTATTGCTGACTTTGTCATCTTCCCACCTCGGTGGGGAGTTGCAGATAAAACCTTCAGACCTCCTTATTACCACAGGAACTGCATGAGTGAGTTCATGGGCCTCATCAAAGGTCACTATGAGGCAAAGCAAGGTGGATTCCTGCCAGGGGGCGGCAGCCTGCACAGTGCCATGACCCCTCACGGCCCCGATGCAGACTGCTTTGAAAAGGCCAGCAAGGCCAAACTCGAGCCAGAGAGGATAGCTGACGGCACCATGGCGTTTATGTTTGAATCTTCCTTAAGTTTGGCGGTCACCAAGTGGGGACTCAAGACCTGTAGCTGTTTGGATGAGAACTACTACAAATGTTGGGAGCCTCTCCGGAGCCACTTCACCCCCAATTCCAGGAGC…	PGVAIADFVIFPPRWGVADKTFRPPYYHRNCMSEFMGLIKGHYEAKQGGFLPGGGSLHSAMTPHGPDADCFEKASKAKLEPERIADGTMAFMFESSLSLAVTKWGLKTCSCLDENYYKCWEPLRSHFTPNSRSPTEPK*	homogentisate_1,2-dioxygenase|PF04209.11	NP_038575.2	301.2	130
TRINITY_DN10383_c0_g1_i1	type:5prime_partial	855	GCTGATTCTGATGCTTATTTGCAAAAAGAAAAGCTTCTCAATGAATTAGGAAAACTTGATGCCCATGTTATTTGCTTGCAACAAGTAGCAAAACCATTTTATAATGCTGTTCTGGAACCTAGTCTTGATGCTCTTGGCTTTAAAAGTGTTTTCAGCCAACCTGAAGATAGCCTTAAAGGAATGGCTACATTTTATAAAAGTTCTCTTTTTAGACTCAGTGGGAAGTCAGATGTATCATTAAAAGAATTGATTGAAATGGAAATTGAAACTTCTTCACTCAATACTACTGATAAAGTGGCTGTAAGAACACATATAAGAAGGTGTGGAAGTGTTCTCTTCACTCATTTTTCAACTGTCATAGGAACACAGACCATTACTATTGCCAATGTACAGATTCCT…	ADSDAYLQKEKLLNELGKLDAHVICLQQVAKPFYNAVLEPSLDALGFKSVFSQPEDSLKGMATFYKSSLFRLSGKSDVSLKELIEMEIETSSLNTTDKVAVRTHIRRCGSVLFTHFSTVIGTQTITIANVQIPRSDFSSHALQISCLAQEVVRVNGGTNKPLLLGGEFNIAENDASYQLLRDGYLSNEMIEELQQRKDVALPGRENDSLLNLLWKSFQHPSSNLCSCYHSVLGHEFVIPELKTASPDLLWYSSDSLHTVGVLDVVSDKVGDHHLSLKADIAFSV*	Gill-associated_viral_3C-like_peptidase|PF12380.6;Endonuclease/Exonuclease/phosphatase_family|PF03372.21	ABI52756.1	99.4	668
TRINITY_DN10390_c0_g1_i1	type:internal	369	GTTAAAGAAAGAATAGATAAGCAATGGTCTTATGGTATATCTAATAATCAAGAAGGCAGTTTTCCTATTGGATTCACTGTTGAATTAAAAATTCCTCCTCTTGCTGAGCAAGATTGTCTATTTGCTGTATCTAATGATTTCTCTGCTCAGGAAGATGGAGACCTCACATTAAAAAAAGGTGACTTAGTTGTAGGAAAGCAACCAATTGATTCAAATTGGTGGAGAGGAGAAATTGATGGACAATATGGTATATTTCCATTGACACATGTTTGGGAAATTGATACAAAAATTCTTCCAAAAGGTTGTTCACTCAAAAAAATGTCTCTCAAGGCAAAAGTTAAAATGAATATGAAAGCCCAAATAGAAGAA	VKERIDKQWSYGISNNQEGSFPIGFTVELKIPPLAEQDCLFAVSNDFSAQEDGDLTLKKGDLVVGKQPIDSNWWRGEIDGQYGIFPLTHVWEIDTKILPKGCSLKKMSLKAKVKMNMKAQIEE	SH3_domain|PF00018.26;Variant_SH3_domain|PF14604.4;Variant_SH3_domain|PF07653.15;Tudor_domain|PF00567.22	XP_001746952.1	52.8	46
TRINITY_DN10398_c0_g1_i1	type:internal	438	GAAGTTGAAAGGGATGGTAAAAATTTTCTGAAAATTTCCTTGCAAGCACTACATAATGTTACAAAGATCTCTTGTAACGATGTGGATGGGAGTTCTGCTCTTTCTTGTCAAAGCATATGTTGGAATCTTTGTGAACTAGCAGATGAATTGATTTTTTGGTCTTGCAAACTGTTAAGAAAAATTCCAGTTAATCATAACACATACTTATTAACATTTCTCCTACCTCCTGGAACAAAAATGTGGGTTCCAATTGGTTGCCATGTACATATCAAATCGTATATTGAAGGAGTAGAAGTCATTAGAAGTTATACTCCAGTTATTTCATCTCTTGCAACTGAAACAAATCCCTTTGATGAATCAGATGGATGCAAACTAGTTTTACTGATTAAAGTATACCCA…	EVERDGKNFLKISLQALHNVTKISCNDVDGSSALSCQSICWNLCELADELIFWSCKLLRKIPVNHNTYLLTFLLPPGTKMWVPIGCHVHIKSYIEGVEVIRSYTPVISSLATETNPFDESDGCKLVLLIKVYPLGVMTPIINQCNL	Oxidoreductase_FAD-binding_domain|PF00970.22	XP_001233871.1	62	222
TRINITY_DN103_c0_g1_i1	type:internal	366	AATGAGCAAAATTTTCAAAGAACGGTCGAAGTAAATCTTATTGGTGTTATTCATGGAACTCTGTTAGCATTTGAATACATGGACAACAGCAAAGCAGGACAGGGAGGACATATAATCAATACAGCATCTATAACAGGTTTGGGTCCTTTATATATAGCACCAGTATATTCTGCTACAAAGCACGCAATTGTTGGATATACAAGAAGTCTCGGACATGAGTTTCATTTTCAAAAAACCGGCATTACAGTGAATGCTATATGCCCAAGCCTTGTGGACACGGAGATCTATCGAACTTTTCCAAGTAAATGTGTGGATGCGGATGAAGCTACGAGATTTGGAGCATCTTTGAAAACTTTGAAACCAGAG	NEQNFQRTVEVNLIGVIHGTLLAFEYMDNSKAGQGGHIINTASITGLGPLYIAPVYSATKHAIVGYTRSLGHEFHFQKTGITVNAICPSLVDTEIYRTFPSKCVDADEATRFGASLKTLKPE	Enoyl-(Acyl_carrier_protein)_reductase|PF13561.4;short_chain_dehydrogenase|PF00106.23	CAA11017.1	100.5	186
TRINITY_DN10400_c0_g1_i1	type:3prime_partial	363	ATGACTGAAAAACTCACATGCCCAGAATGTGGCTGTGTGTGTAAAAAGTGCTTAACCTCAGTTAGATCCTGGCCAAATATAGGTGATATGCATTTAATTGGTGCTGATACATTGCATTTACATCAAGAAATTGAATCTCTAAAACGACAACTTCTAGAGCGAGAATACCACATTTTAAAAATGGAAACAAGTGTTCTTAATCATGCTGAACAGTATCCCAATGGAGAATGGGAACACCTGCAACAAGAATTGCTCATATGTAAAGATAAATATGAAAGGCTGTTTGATAGTCATAAAAAGCTGCAAAAGGTAAATCAAGGCTTAGAAGACAAACTTTTGAAATTGGTTGATAAATTTGAAACA	MTEKLTCPECGCVCKKCLTSVRSWPNIGDMHLIGADTLHLHQEIESLKRQLLEREYHILKMETSVLNHAEQYPNGEWEHLQQELLICKDKYERLFDSHKKLQKVNQGLEDKLLKLVDKFET	Homeobox_associated_leucine_zipper|PF02183.16;Domain_of_unknown_function_(DUF4327)|PF14217.4	XP_001650389.1	58.2	410
TRINITY_DN10410_c0_g2_i1	type:5prime_partial	681	AAACTAACGAAAAGAATAATAATCGAACTCAGCAAACAGGATTTGTGTCCAACTTTACAAAACTCAAAAATCATTATTATAATAGCTGTAGTAATTCTGTTTATCGTCATATGCATATGTTGCTGTATCTTTCGAAAAGCACTGCTCGTCTTTTGCTATTCCTGCGGCTGTAGCAGTCTAAAAGGAAAAGAGAAACATGAATTTACATTCGATGCATTTCTCCTCTATGCTGACGAAGATGAAGACATCGCTTTAAGTAACATCGCTGAAGGTTTAGAATCCCGAATTCCTGGAATAAAATTATTTATTCCAACCAGAGAAGTGTTCCTGACATCTACTTCTGTCAACACCGAATCTTCATTAGCAGACTGCTGTAAAGTTATCGTGCTGTTTACGAGG…	KLTKRIIIELSKQDLCPTLQNSKIIIIIAVVILFIVICICCCIFRKALLVFCYSCGCSSLKGKEKHEFTFDAFLLYADEDEDIALSNIAEGLESRIPGIKLFIPTREVFLTSTSVNTESSLADCCKVIVLFTREFLKNDQCMQLLMSSMACSIENTSKRMIFVVRDKNSLMKEVDITLRAIIKNSICLQFGDILFWQKLKYYLPKRSKSEPKFEESRSCLPDQDRS*	TMIE_protein|PF16038.3;TIR_domain|PF13676.4;TIR_domain|PF01582.18	NA	NA	129
TRINITY_DN10415_c0_g1_i1	type:internal	522	TTCCGATCTGTTTTGGTGAATAAAGGCTACGCCAGCACCGACATCGTTAGGAAAGTCTGCAATACATTAAGTTGCATAGGATTCAGCTTTTGTCTCCTGGGGGTAGCATATGCAGGTTGCGACAAATCATTAAACATAATTTGTTTGGTCACTGCTTTGATTATAGCAGGTTTTGGATACCCTGCAAGTCAGATTGTTCCTTTAGATATGACCATAGTGTTTGCAGGCACTTTAATGGGTATTGTAAGCACAATGGCCAGTACTTCTGGGGTTATCATGCCTTTGATAGTCGGAGCTTTGACAGCCAAAGAGCAAACACTAGGGCAGTGGAGTAAAGTGTTTTATATATCTGCTGGCATAAATTTTACCAGCGGAATCGTTTTTGCCATGTTTGGTTCT…	FRSVLVNKGYASTDIVRKVCNTLSCIGFSFCLLGVAYAGCDKSLNIICLVTALIIAGFGYPASQIVPLDMTIVFAGTLMGIVSTMASTSGVIMPLIVGALTAKEQTLGQWSKVFYISAGINFTSGIVFAMFGSAKLQGWDTLGSEDNSAGVDNEAFDEKNTETCNTKPQETKKG	Domain_of_unknown_function_(DUF3784)|PF12650.5;Major_Facilitator_Superfamily|PF07690.14;Phage_holin_family_Hol44,_in_holin_superfamily_V|PF16079.3	XP_001653763.1	91.3	247
TRINITY_DN1044_c0_g2_i1	type:3prime_partial	510	ATGTTATTGTTCTGTCGCATAAGCGCGGGAATCCGCGATTTGATAACAAAGAGGGTGGTTGAGTTTGATCATTTTTATCAAGCACGAAGTACATTTTTCATGGAGCATAAAGTAAATTCTGTGTATGAGGAGGCAGTGTATGCTTTGAATGGATTACAGAGTAACTCTGTAGTGCTTCAAAAAGCTCGGGAAGAGAGAAGTGCTAAATCTTATAAGAATCTGGTTGATACTGAAAGACATTTAAAAACCCTGGGTGTAAAGCTTGAAGACCTGGATGCTTTAAATATTATACATGTTGCTGGTACAAAAGGAAAAGGATCTACTTGTGCTTTTTCAGAATCAATCTTAAGAAAACATGGATATAAAACAGGCTTTTATAGCTCACCACATCTGATTTCT…	MLLFCRISAGIRDLITKRVVEFDHFYQARSTFFMEHKVNSVYEEAVYALNGLQSNSVVLQKAREERSAKSYKNLVDTERHLKTLGVKLEDLDALNIIHVAGTKGKGSTCAFSESILRKHGYKTGFYSSPHLISVNERIRINGKPISKDAFAKYFWEVYRPVQLSLKDGES	NA	XP_008201145.1	126.3	224
TRINITY_DN10451_c0_g1_i1	type:internal	756	CAACATTTAGGACCTTTGCAGCCTCTGTTTACCATTGCTAGTACCATTTTACAATTTTCATCCATTGCAGATGATTTTTGGAAAAAGGGTGAAGATGCTGGCATAGGAGACCTTTTTACTTATTGCTTAGAAATGTTTTCCATTGAGTTTTGTCCCCTTTTAAATATGTGCTCATCATTGTGCCTGGCAAATCCAGAAAGTTGTTTGAAGGTAACAGAACAATTAAAAAATTTACCAACTTTTACCGAATTTTGGGAAAATATTGATGAAAGGGATATTACAGCAACACCTGAACCAAATGTATGGCAACTTGTTAAAGACAGACCAGTTTATGGAGACAATAATATAATAATACCTAAAGGAACATTTGGTGTAGTTTTGAAACTAGCAGATAAAAAT…	QHLGPLQPLFTIASTILQFSSIADDFWKKGEDAGIGDLFTYCLEMFSIEFCPLLNMCSSLCLANPESCLKVTEQLKNLPTFTEFWENIDERDITATPEPNVWQLVKDRPVYGDNNIIIPKGTFGVVLKLADKNGSSIIQWKVKINGWQICLREIYLRLQEMNYSTAFVSAESIQRVTTVAKLVNSMLKTDIDMRFHLSHLINVLFSILQRCINSSSPSLVFVSVCINIAATLSKSELSDVWQQLAHIQLLPC	Nucleoporin_subcomplex_protein_binding_to_Pom34|PF10487.7;PNGase_C-terminal_domain,_mannose-binding_module_PAW|PF04721.15	NA	NA	232
TRINITY_DN10459_c0_g1_i1	type:5prime_partial	492	TTTACTTCACCCATACGACGATACCCAGATATCATTGTTCATCGCTTGTTAGGTGCTTCTTTAAATTATAACCCTCCTCCCAATTTGCAGCCAGAAGAAATGGAGAAATGTGCCATTCATTGTAATGATAAAAAATACAATGCCAAGAGAGTGAGTGATGTAAGTGCTGAGTTATTCCTAGCGGCATTTATTCGTAAAATGGGCTGTGTTCACTCCAAAGGTATGGTGCTGGGAGTTATGGATCATTCCTTTGATTGTCTTATTCTTGAAATGGGTATTATCAAAAGGGTTTATTGTGATAAATTACCCCTGTTAAAAAGAGAATACAAAAGGTCTCATGGTGTTTCTCAATTGAACCTTTTTTGGAAGGACCCATTTTCAAGTAACGGTTTGGAGCAA…	FTSPIRRYPDIIVHRLLGASLNYNPPPNLQPEEMEKCAIHCNDKKYNAKRVSDVSAELFLAAFIRKMGCVHSKGMVLGVMDHSFDCLILEMGIIKRVYCDKLPLLKREYKRSHGVSQLNLFWKDPFSSNGLEQVIVIFAMVDIIITTDKESLQIRVTLKKPGT*	RNB_domain|PF00773.17	BAC27292.1	142.9	279
TRINITY_DN1045_c0_g1_i1	type:3prime_partial	333	ATGGATAATTCTGTAGATTCTGTTATGCATGATATAGAAAATGAAAAGGGTGGTAATTCCCCTATTAGTTTAGAAAAAAACCCAGAAAGTGAGATGGAACCTATTGTAAGATGTGAAGTTTCTGATGAAACAATTAGTTTTGATGCTGAAGGAAATATAGTGAAAAATACATCAGAACCAGGCACTCCTCTTATTGTGTGTGAGCTATGTGGTGGAGTTTTCAAGCGACGTAAAAATTATGAAATGCACATACTTAAACACCCTGAGAATGAAAAAATTGAATGCAATGTTTGCAATAAAGTATTTCCTTACAACCGTTTCTTAAAACATGTG	MDNSVDSVMHDIENEKGGNSPISLEKNPESEMEPIVRCEVSDETISFDAEGNIVKNTSEPGTPLIVCELCGGVFKRRKNYEMHILKHPENEKIECNVCNKVFPYNRFLKHV	TPL-binding_domain_in_jasmonate_signalling|PF16135.3;C2H2-type_zinc_finger|PF13912.4;c-SKI_Smad4_binding_domain|PF08782.8;Predicted_membrane_protein_(DUF2318)|PF10080.7;BED_zinc_finger|PF02892.13;Zinc-finger_double_domain|PF13465.4;Zinc-finger_double-stranded_RNA-binding|PF12171.6;Probable_zinc-ribbon_domain|PF11331.6;Stc1_domain|PF12898.5;Zinc_finger,_C2H2_type|PF00096.24;Uncharacterized_protein…	NA	NA	137
TRINITY_DN10476_c0_g1_i1	type:internal	501	GGGAAATCATTCCTAAGAATGTCGGGTTCATCATTCGGTATGCCACCTTCCAGCATTGTGGATGGCTTTCGAATGCCGCATGTATTCTCAGCCGAATCGTTTCGTTCAGCGAGACAGTACCAGCCCAGGCCAGATGACGTATTCATTATTACCTATCCAAAATGTGGTACCACATGGGCCCAGCAGATCATTGGCCTCATTTATAAACTAGGGGAACCATGCGAGTCGAGTACTGAATTACTGGGTGATTTTCCTTTTCTGGAACTGAGAGGTGCAAAATCTGCTGAAAACATGCCGAGACCAGGAGCAATTAAAACTCACTTTCCTTTCCATTTGGCGCCGTGGTCTGAACAAGCTAAATACATCCACATCGCCAGAAACCCAAAGGACTGTTGTGTT…	GKSFLRMSGSSFGMPPSSIVDGFRMPHVFSAESFRSARQYQPRPDDVFIITYPKCGTTWAQQIIGLIYKLGEPCESSTELLGDFPFLELRGAKSAENMPRPGAIKTHFPFHLAPWSEQAKYIHIARNPKDCCVSYYYHHKSHVFTGNFDDFFEMFLSGDINFGDYFD	Sulfotransferase_family|PF13469.4;Sulfotransferase_domain|PF00685.25	XP_002399643.1	92.4	169
TRINITY_DN10536_c0_g1_i1	type:complete	372	ATGGCAAAAGTTAGGGCGCGTGAATTGCGAGGTAAAAAGAAGGATGAAGTAATGAAGCAACTCGAGGAGTTGAAGCAGGAACTGGCTTCACTTCGAGTGTCAAAAGTAACTGGTGGAGCAGCATCTAAACTTTCCAAAATTAAAGTTGTCAGGAAATCCATTGCACGAGTCCTTACAGTAATGAACCAAAACCGTAAGGAAAATTTGAGAAAACTGTATAAGAATAAGAAATACAAGCCTAGGGATTTGCGTCCTAAGAAAACCAGAGCCATGAGAAGGGAACTCACAAGTAGACAAAAGAATCTGAAGACTCGCAAAGAAATGAGAAAAATGCTTTTGTGGCCCAAGCGAAAATACGCTGTTAAAGCATAA	MAKVRARELRGKKKDEVMKQLEELKQELASLRVSKVTGGAASKLSKIKVVRKSIARVLTVMNQNRKENLRKLYKNKKYKPRDLRPKKTRAMRRELTSRQKNLKTRKEMRKMLLWPKRKYAVKA*	Protein_of_unknown_function_(DUF1003)|PF06210.9;Protein_of_unknown_function_(DUF737)|PF05300.9;Ribosomal_L29_protein|PF00831.21	ABX75380.1	209.5	52876
TRINITY_DN10537_c0_g2_i1	type:internal	1299	AAACTTGAATCCATGGATATTGAGGAAGAGAATGAAAGTAATGATTTAAGAATTGACTTAACTGAAAAAAGTGATAACAATGTTTTGAATCCAGAGTTTAGTACAGACTTGTCTTTGGAGAAAATGAACATCTGTGAAGAAATGGACACAGTTTTCAAGAAATGGAGAAGTATAAAATACAAATACTGGTTTCCAGATTCAGAAAATAATATTAAAAAGCGCAAAGACGAAGCACCAGAAAAGGCTGTTCGTCCATTTTATCATACAATAAAACCTTCTCAAATGCCAAAAGATGAAAGAAAATGTATTTTCTGCCATGCTACTGGTGATGGCGATACTAATGGAGCTGCCAGGTTACTTAATGTTGATGTCAACAAATGGGTCCACTTGAATTGTGCA…	KLESMDIEEENESNDLRIDLTEKSDNNVLNPEFSTDLSLEKMNICEEMDTVFKKWRSIKYKYWFPDSENNIKKRKDEAPEKAVRPFYHTIKPSQMPKDERKCIFCHATGDGDTNGAARLLNVDVNKWVHLNCALWSAEVYETVNGALMNVETAIKRSRHLNCCFCHKQGASVRCFKTRCPSIYHFPCARKEQCSFFKDKTVLCPQHAHRGNMENKLDSVAVFRRVYINREEHKQVASMIQDEKFVLRIGSLIFLNIGQLLPTQIQAFHNTNCIYPVGYKVIRMYWSMRKLGRRSQYSCTINEVSGKPEFCINVREVDQKELELKDKTAKGVWQKVIYPIEKMRKQAKTIKIFPDFISGDDLFGLTEPAVLRIIESLPGVDTLNDYNFRYGRSPFLELPL…	Domain_of_unknown_function_(DUF5028)|PF16431.3;F/Y-rich_N-terminus|PF05964.12;PHD-zinc-finger_like_domain|PF13832.4;PHD-like_zinc-binding_domain|PF13771.4;F/Y_rich_C-terminus|PF05965.12	AAF74766.2	412.9	1128
TRINITY_DN10565_c0_g1_i1	type:3prime_partial	342	ATGAGTGATTATGATGAAGTCATGTCCAACGATCCTCGAAAGAAAATTGTTATCGTAGGTGATGAAAAGTGCGGAAAAACTAGCCTTGTTTATAAATATTTCTCCGGTGCCTTGCCAGACCCGGCGGTGACTATAATGTATAGGGAGTATCAGACAGATGTAGAAGTGGGCGATCAAAAGATACCCATCGTAGTATGGATTGTTCCTGCACAAGAACGTATTAGAAAGCATCGACCTTTTATCTACAAATTTAGCAAAGCTGTAATCCTTTGCTATGCTATCGACAACCCAATGAGTTTACAAAACGCTTGCGAAAAGTGGTATCCTGAAATTGAAAAGTAC	MSDYDEVMSNDPRKKIVIVGDEKCGKTSLVYKYFSGALPDPAVTIMYREYQTDVEVGDQKIPIVVWIVPAQERIRKHRPFIYKFSKAVILCYAIDNPMSLQNACEKWYPEIEKY	Ras_family|PF00071.20;Bacterial_TniB_protein|PF05621.9;Signal_recognition_particle_receptor_beta_subunit|PF09439.8;ADP-ribosylation_factor_family|PF00025.19;AAA_domain|PF13173.4;Gtr1/RagA_G_protein_conserved_region|PF04670.10;AAA_ATPase_domain|PF13191.4;ATPase_domain_predominantly_from_Archaea|PF01637.16;Mitochondrial_ribosomal_death-associated_protein_3|PF10236.7;Ethanolamine_utilisation_-_propa…	AAW24866.1	89.4	107
TRINITY_DN10568_c0_g1_i1	type:3prime_partial	483	ATGCTTTGCATTTGCGCTGCTTATACTCAAGTTCAAAGAAGAATTCAAGCTGAAATTGATGAAGTCGTAGGGAGAGAGCGCTTTCCGACTTGGCAGGACCGTCTCAGAATGCCTTACACTGAGGCTTGTATAGCAGAGCTCATGAGATGGAGGACGATTGTTCCCTTAAATCTTCTGCGATATACTTTACAGGATACAGAATTAAATGGATACTTCATTCCGAAACATACTAACGTCCTGTCAGTGATCTGGGCCATAGATCATGACGAAAAGCTCTGGGGAAAGGATGTTTATAAGTACAAGCCAGAAAGATTTCTAAGTCCAGATGGTCAAAATGTGGTGAAACCCGAATATGCAGTTCCTTTTTCAGTTGGTAAGAGATCGTGTCCAGGAAAATCA…	MLCICAAYTQVQRRIQAEIDEVVGRERFPTWQDRLRMPYTEACIAELMRWRTIVPLNLLRYTLQDTELNGYFIPKHTNVLSVIWAIDHDEKLWGKDVYKYKPERFLSPDGQNVVKPEYAVPFSVGKRSCPGKSLAEIEVFLYTVAILQKFEVSAPPGKEIN	Cytochrome_P450|PF00067.20	NP_001020030.1	139.8	481
TRINITY_DN10586_c0_g1_i1	type:5prime_partial	624	ACGCAGATAAATTCTGTAATTTATTTCGTCAGCATGGAAGATGCTACACGAAGCGAATCTTTATTCGAGTTAAGGGATGATTTCGGCCATCTGCTGAGAATCCAATCTTTATCTGATGTTGACATTAAATGTGGAGGTATAATCATTCCTGCTCACAAAAGTATTCTATTTGCAAGGGCACCGGTATTCGCCACTATGATCCGTAATAATCAAATGAGAGAAGTCATCGAGGTGGACATCGATGTATCTGTTCTGAAAATCATGGTTTTGCACATTTACACGGGGAAAATGGGCTTTTCGACCGAGACATTTTCCCAGACATTGGATGTCTTGGTAGCCGCAGATAAGTACCAGTTGTTTGGCCTAAAGAAAGCTTGCTGTAACTTTTTGGAAAAAAAA…	TQINSVIYFVSMEDATRSESLFELRDDFGHLLRIQSLSDVDIKCGGIIIPAHKSILFARAPVFATMIRNNQMREVIEVDIDVSVLKIMVLHIYTGKMGFSTETFSQTLDVLVAADKYQLFGLKKACCNFLEKKVSINNAIKILIVGDMFAPDLKGFVMDFLCKKCEFSVLQESKDWKMLERTHRSLSLEVLTTVVRDREQKMKECNN*	BTB/POZ_domain|PF00651.29;Ribosomal_protein_L21e|PF01157.16	XP_001901177.1	80.1	204
TRINITY_DN10599_c0_g1_i1	type:internal	387	GAAGGTTATTTCTTGGCAAATTTTAAAAGTCTAAAAAAAGCTCAGAAGGTTAAGAAAATCCTTCAAAAATCTCAGACAAATGAACCAACATCTCCCAAGTTTTTGAAATTAATCAAGCAAGATGGTATTTTAGGTGATTTGAATTCAGGAGATAGTATTATGGACAGTAATATGAAGAAAATTCAAGAACATATCCAAATTATTGAATCAAAGAAAGAAAATTGTTTGAATAAACATAAAAAAAGTATTGTTGACCAAAAGGATTTGGTTAAATCATCGGTTATTGGAGCTAATGATGCTCTTTCAGCAAAATTAGCTGAGTTGAACGAACAAAAAGTTGCTTTCTTGAATTATACTCAAGATGCTATAAATAAAGTTAGAAGTACA	EGYFLANFKSLKKAQKVKKILQKSQTNEPTSPKFLKLIKQDGILGDLNSGDSIMDSNMKKIQEHIQIIESKKENCLNKHKKSIVDQKDLVKSSVIGANDALSAKLAELNEQKVAFLNYTQDAINKVRST	NA	NA	NA	88
TRINITY_DN105_c0_g1_i1	type:internal	432	AGGAGCTTAATTAGTATGATAAGTGCAGCTTCGGCTAATGAAGTATCATACGGCGGTGGAGCTTCAGCAGCAGCAGCAGCAGCAGGTGGTTACGGACAAGGTCCATCAGGATATGGCCCAGGAGCATCAGCTTCAAGTGCCGCAGCTGCAGCTGCACCTAGTGGATACGGCCCAAGCCAGCAAGGACCATCTGGATCCGGAGCGGCAGCAGCAGCTGCAGCACCTAGTGGATACGGTCCAAGACAACAAGCACCATCTGGACCCGCAGCTGCAGCCGCCGCCGCAGGACCTGGAGGGTACGGACCAGCACAAAGAGGACCAAGTGTATATGGACCATCAGGACCTGGAGCAGCAGCAGCAGCAGCTGCTGGCGCAGGACCTGGAGGTTATGGACCAGGA…	RSLISMISAASANEVSYGGGASAAAAAAGGYGQGPSGYGPGASASSAAAAAAPSGYGPSQQGPSGSGAAAAAAAPSGYGPRQQAPSGPAAAAAAAGPGGYGPAQRGPSVYGPSGPGAAAAAAAGAGPGGYGPGQQGPGVYGPSG	Mucin-like|PF16058.3	AAL32472.1	159.8	1525
TRINITY_DN10600_c0_g1_i1	type:internal	858	ATCTCCTACCTAAAAATCGCCTTAATCATGTCCCATAGTACCGCTTCTTTGGTAAATCTTTGGGAATATGAAGGTCAAAACTATGCTACAAATTCAAGTGGAAGTAAAACTACTAATACAAATGCACAGACGTTGTCACCTGTAAAAGCAGAACTTATTAAGTACTATAAAAAAAATGGATTGGAAACTATAGCTAAAGAGGTTGGGATTATTCGTCCTAATGGAGAAATAGCCAGTGGCAAAAACACCAATCGACCTAGAGAGCTTAGAGCCCAGATAATTACTTTACCTGTTGTTAGCACACCTACAACAATAGCCATGTCACCCTTTAAAGTGGAACCTGCTATTTTACCAAAAAATGTTCACCTACCTAGTTCTCCTGTGATTCTCAGCACTCCA…	ISYLKIALIMSHSTASLVNLWEYEGQNYATNSSGSKTTNTNAQTLSPVKAELIKYYKKNGLETIAKEVGIIRPNGEIASGKNTNRPRELRAQIITLPVVSTPTTIAMSPFKVEPAILPKNVHLPSSPVILSTPQRVVANVINSTRNQQHLLPAPEHSISGWSTKRPHEYADEYPESKRCKKGEKGGKGLRHFSMKVCEKVRKKGTTSYNEVADELVAEFSDPHRHMCPTDQAYDQKNIRRRVYDALNVLMAMNIISKEKKEIKWLGLPTNSAQEYHNLEKEKQKRM	Death-like_domain_of_SPT6|PF14878.4;E2F/DP_family_winged-helix_DNA-binding_domain|PF02319.18	CAB45775.2	187.6	635
TRINITY_DN10610_c0_g1_i1	type:internal	333	CTTCCGATCTCTGGGGCTCTGTCCAAGCATCGTATGACCCATACTGGAGAAAAACCATACTCTTGCAACGAGTGCGGACGGAGGTTCACTCTTAAAGGTACATTAAGTCGTCATTTGAGGACACATACTGGTATAAGGCCACATACGTGCACTTATTGTGGTAAAAAATTCATTCAGATAGGAGGTTTAAATGCCCATATGTTTTACCACACTGGAGAAAATGGATTCAAATGTGATGATTGTGGCAAGGTCTTTAATCGTAAAGCTAGATTGCAGATGCACCAGCTCTATGTTCATATAAAGTTAAAGCCATTTGTTTGTGAGCATTGCAGC	LPISGALSKHRMTHTGEKPYSCNECGRRFTLKGTLSRHLRTHTGIRPHTCTYCGKKFIQIGGLNAHMFYHTGENGFKCDDCGKVFNRKARLQMHQLYVHIKLKPFVCEHCS	LYAR-type_C2HC_zinc_finger|PF08790.9;Zinc-finger_double_domain|PF13465.4;C4-type_zinc_ribbon_domain|PF02591.13;Hydrogenase/urease_nickel_incorporation,_metallochaperone,_hypA|PF01155.17;C2H2-type_zinc_finger|PF13894.4;zinc-finger_C2H2-type|PF16622.3;Aspartate_carbamoyltransferase_regulatory_chain,_metal_binding_domain|PF02748.13;HypF_finger|PF07503.10;zinc-ribbon|PF14369.4;Zinc-finger_domain|PF10…	XP_001654847.1	152.1	82
TRINITY_DN10611_c0_g1_i1	type:internal	543	TCTCTATTACAAGCTCTCCATGATACTTTATTTGAAAGAACAATTGACTTCTGTGGATTTTCGGTACCATCTGGCAACAATAAATCTGAAATAATTGGAGCGACATCAGGATTTTTTGATTCTGTTCGCAAAGCATTAAGTGGACGGAATCGTAGTCATTCTGTGGAATCTAACATTGCCCATACTACTCCTAAACGCTCATCGTCTAGAGCTAGTAACAGCAGTTTAACTGGCACAATAACTGGTGACACTACTCCATCAACTCTAAGAGCTCAAAGCTCTCAAATATTGGATGGAGCGTCATCTGCAAGTCCAGTTAACTGTCAAGTCAAGTTTGGGAAGAGAACAAGTAGCAATCCTGAGACACCAATTTCCAATTCAAGTACTCCTCCGTCTCTG…	SLLQALHDTLFERTIDFCGFSVPSGNNKSEIIGATSGFFDSVRKALSGRNRSHSVESNIAHTTPKRSSSRASNSSLTGTITGDTTPSTLRAQSSQILDGASSASPVNCQVKFGKRTSSNPETPISNSSTPPSLQPTMCESDSSSMNSLELERPVAPEDSDTGMESMSSADAPLLSSNSLHA	NA	NA	NA	139
TRINITY_DN10611_c0_g3_i1	type:5prime_partial	351	TCTCTATTACAAGCTCTCCATGATACTTTATTTGAAAGAACAATTGACTTCTGTGGATTTTCGGTACCATCTGGCAACAATAAATCTGAAATAATTGGAGCGACATCAGGATTTTTTGATTCTGTTCGCAAAGCATTAAGTGGACGGAATCGTAGTCATTCTGTGGAATCTAACATTGCCCATACTACTCCTAAACGCTCATCGTCTAGAGCTAGTAACAGCAGTTTAACTGGCACAATAACTGGTGACACTACTCCATCAACTCTAAGAGCTCAAAGCTCTCAAATATTGGATGGAGCATCATCTGCAAGTCCAGTTAACTGGTATGCATCTAATTTTTACATTTTTTAA	SLLQALHDTLFERTIDFCGFSVPSGNNKSEIIGATSGFFDSVRKALSGRNRSHSVESNIAHTTPKRSSSRASNSSLTGTITGDTTPSTLRAQSSQILDGASSASPVNWYASNFYIF*	NA	NA	NA	62
TRINITY_DN10619_c0_g1_i1	type:internal	345	AAGTGGGAGCTCAATAATGAGGATGTTGACTTAATTGAAAAAATTGGTTCGGGCAATTTTGGCGATGTGTACCGAGCTCAGTTAGCCAATTATCCTGAAGAAGTAGCTGTAAAGACATGTCATGTTAACTTACCTGATGTACAGAAACGGAAGTTTTTACAAGAAGGACGAATTCTTATGGATTATAGTCATCCTAATATTGTCAAATTCATTGGAATTTGTGTTCAGAAATTGCCTTATATGATTGTGATGGAGCTTGTACCAGGAGGTTCTCTTTTAAATTATTTACAAAGACATAAGGAAACTTTAACCCAAGAACAACTTTTATCTTTTTGCATTGATGCG	KWELNNEDVDLIEKIGSGNFGDVYRAQLANYPEEVAVKTCHVNLPDVQKRKFLQEGRILMDYSHPNIVKFIGICVQKLPYMIVMELVPGGSLLNYLQRHKETLTQEQLLSFCIDA	Protein_tyrosine_kinase|PF07714.15;Protein_kinase_domain|PF00069.23;ABC1_family|PF03109.14	XP_971555.1	161	56
TRINITY_DN10623_c0_g1_i1	type:internal	348	TTGAACGATTATTTCGTAAATACAAACTCTAACTTTAAAAGTGAAGTGCCACATGCATCTGAAGAATCACCTGTTTATTTGACTAGCACCACTCCTAATATTGTGAATTTGCGATTTTGTGCAAGTATTCCCAATACCTGTGCTTCCACAAAATATTCTAATCAACCTAGTGTACATTATATCAGTTCTTATGTTCAGCCTATTGTACCAACTAATACTTCATCACATTCTGCATTTGATTCATTGCGACTTTGGATCTATCAAACAAACCTAACAACAGCAGTATATCTCACCATGTGGAGCCACCTGGTTATCTTAATAACGATAATAAAGTTGAATTTTCACAGA	LNDYFVNTNSNFKSEVPHASEESPVYLTSTTPNIVNLRFCASIPNTCASTKYSNQPSVHYISSYVQPIVPTNTSSHSAFDSLRLWIYQTNLTTAVYLTMWSHLVILITIIKLNFHR	Small_subunit_of_serine_palmitoyltransferase-like|PF11779.6;CMV_US|PF08001.9	NA	NA	76
TRINITY_DN10633_c0_g1_i1	type:3prime_partial	348	ATGGCACATTTTAATCTTGAAAATGAACTTAGTAATGCTTTGAGATTTGATGCACCTCTGAGCAGAGGACCTGTTCCACGATGGCAGAGAAAGGCATTAGAGAATTCTTTTGCAAACATGTCTGTTAACACATCTAGTAATGATTCAACTCTTATAAATATGTCTCTTAATAAAAGTGCATCATTAAAGGTACCTTCCAGTCCTAAGAAAACTCTTGAGGAATGGAATAAGCGCATAACTCCTGGTAGAGGTGGCTCTGGTTCTAAAAGTCCTCGTGACCAAGGGGATCGGTTTATTCCTCATAGAAGTAGTATGCATTTTGAATTAGGGCATTATTTGCTTACTAAA	MAHFNLENELSNALRFDAPLSRGPVPRWQRKALENSFANMSVNTSSNDSTLINMSLNKSASLKVPSSPKKTLEEWNKRITPGRGGSGSKSPRDQGDRFIPHRSSMHFELGHYLLTK	Variable_charge_X/Y_family|PF15231.4	XP_969612.1	69.3	140
TRINITY_DN10637_c0_g1_i1	type:internal	408	AATAAAACTTCAAATACTAAACCTTCTAGTTGCTCTAAAGACTTAAATCAAAATAAGAAGGTATATTCATCAAAGTCTTATCAAAACAAAAATGTGTATTCATCAAAGACTTATCAAAACAAGAATGCATATTCATCAAAGTCTTATCAAAACAAAAATGTGTATTCATCAAAGACTTATCAAAACAAGAATGCATATTCATCCAAGTCTTATCAAAACAAAAATGCATGTACATTAAACAATTGTGACTCTCCTAACAGAAAAAATGATAAAATTGGTTCAGTTTATCACAGGCCAACAGACCCTCGTTTGCGACATAGCCGAATATTTTCCAATAGTTTACCTTTGGAAAAAATTGTCATTTCGCCGGCATCTTCATCAGAAAACTGCACTCCCCAA…	NKTSNTKPSSCSKDLNQNKKVYSSKSYQNKNVYSSKTYQNKNAYSSKSYQNKNVYSSKTYQNKNAYSSKSYQNKNACTLNNCDSPNRKNDKIGSVYHRPTDPRLRHSRIFSNSLPLEKIVISPASSSENCTPQHTL	Plasmid_recombination_enzyme|PF01076.17;Mucin-like|PF16058.3	NA	NA	40
TRINITY_DN10642_c0_g1_i1	type:5prime_partial	459	AAAAAAGATGATGAAGAAAACAAAAGACTTAAGTGTGAAGAGTTCAAAACTGAAGGTGTGAGATTGGCTGAACTAAACAGATTTGAGGATGCAGTAAAAGAATGGGATAAAGCTTTGAATTTGATGCCTAGAGATGAAAAAATTTTAGAAATGAAAGCACAGGCACTTCTACAGCTAAATACTCCGTTCCCAGCTTTGCAAGCTGCTGAAAGAGCTGTTAAAATAAATCCTCAATGGTGGGTTGCATATCAAACCTTAGGACGAACACAGTTGGGAATCGGGGATTTGAAAATGGCTAAAATAAGTTTTTCCAAAGCAATTCATCTGAATCCTTCTGAAACTGAATTGTGGGAAGAAGATTTGAAATGGACTCTTAGTCTCATAGAAGAAAAAGTTAAG…	KKDDEENKRLKCEEFKTEGVRLAELNRFEDAVKEWDKALNLMPRDEKILEMKAQALLQLNTPFPALQAAERAVKINPQWWVAYQTLGRTQLGIGDLKMAKISFSKAIHLNPSETELWEEDLKWTLSLIEEKVKLDAELLASEKELATETKLS*	Tetratricopeptide_repeat|PF13428.4;SHNi-TPR|PF10516.7;Tetratricopeptide_repeat|PF14559.4;Tetratricopeptide_repeat|PF00515.26;Tetratricopeptide_repeat|PF13431.4;Tetratricopeptide_repeat|PF07719.15;ChAPs_(Chs5p-Arf1p-binding_proteins)|PF09295.8;Tetratricopeptide_repeat|PF13181.4;TPR_repeat|PF13414.4;Tetratricopeptide_repeat|PF13432.4;Tetratricopeptide_repeat|PF13371.4	AAH36536.1	122.9	402
TRINITY_DN1064_c0_g1_i1	type:internal	393	TTGAGTCCAGCTGTATTTAGCCTTTTTATTGGATATTATGGGAAATATGTGCATAGACCTAAACTCGTTTCATTTGGTCTGATGTTTACTGTTCTTAGTTGTTTTCTGAGTTGCTTACCATATCTGTTATTTGGTTCTGAAATAAAATCAATTTCGAATTCCTCAAAAATCATTTATTTGTGCAATCATAGCAAAACTTCTGTAGGATGTGAAAAATTGTCTCAAAATCTTGTTGCAATTATAATTCTTTTTATTGCTAATTTTTTAAATGGTTTTGGCTCTATGGCTTATTATACAATTGGTGTACCATATTTAGATGATAATGTCAAGAAAAAGAATTCTCCTTTGTATTTAGGAACCATGTTTGCCTTAAGAATTGTAAGATCGGAAGAG	LSPAVFSLFIGYYGKYVHRPKLVSFGLMFTVLSCFLSCLPYLLFGSEIKSISNSSKIIYLCNHSKTSVGCEKLSQNLVAIIILFIANFLNGFGSMAYYTIGVPYLDDNVKKKNSPLYLGTMFALRIVRSEE	Organic_Anion_Transporter_Polypeptide_(OATP)_family|PF03137.18;Major_Facilitator_Superfamily|PF07690.14;Conjugal_transfer_protein_TrbE|PF11100.6	NP_001075258.1	49.7	126
TRINITY_DN10653_c0_g1_i1	type:3prime_partial	495	ATGCAATTGTATACAGGACGATTTTTGCGATATTGTACTATAGGTGTGATACTTATGTGCATATTTGTAGTATCTTTTCTGTGGTACACATGTTCAAATGAAAAATGTCTGTTAAATAAACTCCAGATTTTCACTTCGGGCAAAAATTATACTTACCAAGCTCCTTGGCGAAGATTGAAAGCGAATAGGGAAATCATATCAAATTGGACAGAGAAAAAATATATTGCAGAAAGCAGTAAATTAGACTTTGTTAAATCAGACTTCAACATTAAAGGTTCTGATGTTATTGTCTTTTTACACATCCAAAATACTGGTGGCAGTGTTTTTGCCCGTCATATGGTTGAAGATTTAGCTTTGGAAAGACCTTGTCGCTGTAAGAAAAGAAAACGCATTTGTCAA…	MQLYTGRFLRYCTIGVILMCIFVVSFLWYTCSNEKCLLNKLQIFTSGKNYTYQAPWRRLKANREIISNWTEKKYIAESSKLDFVKSDFNIKGSDVIVFLHIQNTGGSVFARHMVEDLALERPCRCKKRKRICQCYRPNNFGSTWFFSRYTAGWKCGVHPDWSELS	Sulfotransferase_family|PF03567.12	NP_001073672.1	112.8	192
TRINITY_DN10667_c0_g1_i1	type:internal	423	CAGAAGAGGATTGATGGCAGTTTGGATTTCAAGAAGAACTGGATTCAGTATAAAGAAGGATTTGGACACCTGTCGCCTACTGGCACCACAGAGTTTTGGCTGGGAAATGAGAAGATTCATTTGATAAGCATGCAGTCCACAATTCCATATGCACTGAGAATACACCTCAAAGACTGGAATGGCAGAACCAGCACTGCGGACTATGCCATGTTCAGGGTGGGTCCCGAGTCTGACAAATACCGCCTGACCTATGCCTACTTCATTGGTGGAGATGCCGGGGATGCCTTCGACGGCTACGATTTCGGCGATGACCCCAGTGACAAGTTTTTCACATCCCACAACGGCATGCAGTTCAGTACCTGGGACAACGACAACGATAAGTTTGAAGGCAACTGTGCG…	QKRIDGSLDFKKNWIQYKEGFGHLSPTGTTEFWLGNEKIHLISMQSTIPYALRIHLKDWNGRTSTADYAMFRVGPESDKYRLTYAYFIGGDAGDAFDGYDFGDDPSDKFFTSHNGMQFSTWDNDNDKFEGNCAEQDGSGRS	Fibrinogen_beta_and_gamma_chains,_C-terminal_globular_domain|PF00147.16	XP_006232587.1	294.3	121
TRINITY_DN10677_c0_g1_i1	type:5prime_partial	336	GTCCTTTTGATGATTCTTGCACTTTCCGCATTTGCAAATGCTTTTGGCATGTGGAAAGGCGGTTGCAAATCTGATGACGACTGTAATGAAAATCAGTGTTGTTTGAAACAGTATGGATCTTCTTTTGGACAATGCATGAAAAGACCTAAAGAAGGAGATATGTGTATTCCTGACAATAAGTTCAACAAAATGTTTCAACAAAATTCCTGTCCCTGTCCTGAGGGATTAAAATGCACTACAGGAGATAAAAACAATGCATCTGGTATGAATTATGCTCTGCCACCAAGATGCCAGGTTATTCCTGAAACAACCGAGGAACCCAGTACAACATCATAA	VLLMILALSAFANAFGMWKGGCKSDDDCNENQCCLKQYGSSFGQCMKRPKEGDMCIPDNKFNKMFQQNSCPCPEGLKCTTGDKNNASGMNYALPPRCQVIPETTEEPSTTS*	Late_nodulin_protein|PF07127.9;ATP_P2X_receptor|PF00864.17;Prokineticin|PF06607.9	NA	NA	178
TRINITY_DN10686_c0_g1_i1	type:5prime_partial	366	CCACCACCCACCGTACAGCCGCCACAACAAGTCCAGATGCATACAATAGTTCAACCTACACCACCTCCTAAAAAGAGTCTTTCATTAACAAAAGAGCAAATGCAAGAAGCTCAAGAAATGTTTAATAAATCAAATAAGGTTACAAGACCAGAGAAGGCATTGATACTTGGTTTTATAGCAGGTTCTAGAGACAATCCTTGTCCCCACCTTGGTCAGATTGTAACTATTATGCTGAGTGAGAATGAAGAAAAAGTGCATCAAGTGGATGGCACAGTACAGTCCATGATGGTAGAGACACATTTCCAAATGAATTACAGTACCGGAGAATGGAAAAGAGTCAAGAAGTATCGTCGTTTGGAAGCATAA	PPPTVQPPQQVQMHTIVQPTPPPKKSLSLTKEQMQEAQEMFNKSNKVTRPEKALILGFIAGSRDNPCPHLGQIVTIMLSENEEKVHQVDGTVQSMMVETHFQMNYSTGEWKRVKKYRRLEA*	NA	NP_001026338.1	138.3	88
TRINITY_DN10701_c0_g1_i1	type:5prime_partial	300	TTTAGAAGCCACAGTCGAGGATCATCAGGAATCTTAAGAGCAGAAAAGTTGAGGAGTGCCTTAATGGATGTTGGTTTTCAAGTGAATGTCGATGCACTGTCATTGCTTGTGCTGCGATACATGCGGAAAGATGGTACATTAAGGTTTGGTGATTTTGTCCTTTGTATACTACATTTAATGGTTGCTTTTGGTAAGTTTGATTTCCTTCTGTTTCAATTTAAACTTAGATTAATTAAGAACACTCAATTCAACTATTTGGAAAAAAAATACTTCACATTAATTAAAAATGTGTATTTTTGA	FRSHSRGSSGILRAEKLRSALMDVGFQVNVDALSLLVLRYMRKDGTLRFGDFVLCILHLMVAFGKFDFLLFQFKLRLIKNTQFNYLEKKYFTLIKNVYF*	NA	XP_001656836.1	86.3	388
TRINITY_DN10706_c0_g1_i1	type:internal	468	CGACTTTATAAACTTAAAAAAGATTCTGCAGACAAAGAACAACTTGAAAAGGAGAAAAATGCTATTGACGATATAAAAAGAAAAATTGAAGAAGAACTTTTGGAACAAGCTGAAAAAAAGATTAAGGACCAAAAGCAATTACAGAAGCAAGCACAAGAGCTTCAAGCGGAGCGGGATAAAATACGATTGCAAGAGAAAATGAAAGACATGGCTCAAGATCTAAAAGCTGATGAATATCGCAAAGCCCAAGAATTTAGAGCAAAACAGCTTGATGAGGAAAGACAATTAACTACGGAACAAAGAATACAGCTTCAAGAGGAATTGCTTTCAGATTTAGAGAAAATTTATTCTGAAAAATTAAAAAGAGACATTCTGAGAACTGAATTGGCTGTGGAAGAA…	RLYKLKKDSADKEQLEKEKNAIDDIKRKIEEELLEQAEKKIKDQKQLQKQAQELQAERDKIRLQEKMKDMAQDLKADEYRKAQEFRAKQLDEERQLTTEQRIQLQEELLSDLEKIYSEKLKRDILRTELAVEEKDAQERAKEHETESKKIKVREDP	Trichohyalin-plectin-homology_domain|PF13868.4	XP_001308622.1	66.2	224
TRINITY_DN1072_c0_g1_i1	type:internal	426	ACTTTCGATGACGCCGTCAACAACAACAACATCATCGTCTATGAAAGGATCTTCAAAGACGGTCGCAACAACCCCAATGGATGCTCCGCAAAGGGAACCTTCTTCGTGTCACACAAGTACACTAACTACTCTGCCGTTCAAGAATTGCACAGGAAGGGACACGAGATAGCTGCTCACTCTATCACGCACAGAAACCAAGAAAAATACTGGACCGAAGCTAGCTTGGACACATGGGCTAAAGAAATGGCTGGTGTGAGGTTGATTTTGGAACGTTTTGGAAACATCACTGACAATTCCATCGTTGGAGTTCGAGCACCCTACTTGAGAGTCGGAGGAAACAGCCAATTCTCTATGATGGAAGAACAAGCTTTCTTGTACGATTCCACTCTTACTGCTCCC…	TFDDAVNNNNIIVYERIFKDGRNNPNGCSAKGTFFVSHKYTNYSAVQELHRKGHEIAAHSITHRNQEKYWTEASLDTWAKEMAGVRLILERFGNITDNSIVGVRAPYLRVGGNSQFSMMEEQAFLYDSTLTAPLSNPPLWPY	Polysaccharide_deacetylase|PF01522.19;Hydroxymethylglutaryl-coenzyme_A_synthase_C_terminal|PF08540.8	NP_001095946.1	244.2	168
TRINITY_DN10732_c0_g1_i1	type:5prime_partial	522	AAAAAGGGCTTTCGGTTAAAAGTCGACGGTCCTCCCACAGTGAAAGACAGTAAGACGTACTTAGATATTTTAAAACGCATCTATTTAAATTTGATTATTGTGTCTCAGGTGTCAGTAATTAGATTGAGTGAACTCACATGCGTATTTGATGGAGTACGTATCGTGGAAGTTACTGGATGGATCTTAGAAAAACCTAATGTAACAGGTTCTAAGACAGGAAAGACCGAGCCGGATATGAATACAGCCTACAGGATAATAGAAGATGCAGCCAAGTCTGGAACTTTGACTGTTAAAATAAAGAAAGACGGAATGGATATTGTATATGCAATTACAGCGATTGAAACTATCGAGCATCCAGAAAATGTGGCGAAACATTTATTCTCTGGAGGTACGCTTGCT…	KKGFRLKVDGPPTVKDSKTYLDILKRIYLNLIIVSQVSVIRLSELTCVFDGVRIVEVTGWILEKPNVTGSKTGKTEPDMNTAYRIIEDAAKSGTLTVKIKKDGMDIVYAITAIETIEHPENVAKHLFSGGTLAAVSLVLFVLGILLGVTSYYMFLKRQKTQFDYQMHMNTMKG*	Non-classical_export_protein_1|PF11654.6;Domain_of_unknown_function_(DUF202)|PF02656.13	NA	NA	857
TRINITY_DN10735_c0_g1_i1	type:internal	675	GTGGGAGAAGACAACTTTAGAACTGGAATTTCTAATTTCTTGAAGAAATACCAGTATCGAAATGCGAAGACTGGTGATCTTTGGGAGGAACTATCGAGCACCTGTGGCTTACAGGGCAACCGCAGTATTGCTAGCATAATGAAGACGTGGACGGAGCAAATGGGTTTTCCCTACATCTCGGTGAGCCGTGGCACCAACACCTTCGTTGCCCGGCAAGCCAGGTTCCTCAAGAATGGCAACCTCCAGCTGGAACAAGCTCCGTCCAGGTACGTGTGGAGTGTTCCTCTCAGCTACACGACGGGCGACGGAGAATCGGGATTAGTGTGGATTCACGACGAGGAAGAATTGGTGTTCAACGTTTCCACTAAATCCTGGGTGAAGTTCAACGTCAACCAGACG…	VGEDNFRTGISNFLKKYQYRNAKTGDLWEELSSTCGLQGNRSIASIMKTWTEQMGFPYISVSRGTNTFVARQARFLKNGNLQLEQAPSRYVWSVPLSYTTGDGESGLVWIHDEEELVFNVSTKSWVKFNVNQTGFYLVNYQKEDWIRFSDLLLTQHEALSPSDRSNLLFDSFLLAEAGHVPLHLFLSMSQYLERETHFIPWETAYAAFVYLCQMLEATEVNVMPK	ERAP1-like_C-terminal_domain|PF11838.6	NP_001253585.1	135.6	421
TRINITY_DN10748_c0_g1_i1	type:internal	342	CGTACCTGTAAGATGATTGGTTACTGGTGCCGAAGTTACAAAGCTTTTCTAAGAGGGGAGTGTGGTGACTGTGGATCGGATGGATCACAATGTGCCCTCATGGGATTTCAAGCAGACCAATACGAACCATTTAAGAATTCCAATTTCTCTTCAATGTATTTAGTAACAGGATCTTATCCGAATTTTTGTGTATATGAATATCGGCTTAGAATGCTGCTGGAAAATACTGATCCCGGCCTCGAAATGCATACAAAAACTGGAAATCTCTTACTTCTACTGAGGGGGCAAAGGAAACCTCTTTTTGTGCCTCTTAGGTTTTTTAGCATGCATTCGGGAAAAGAA	RTCKMIGYWCRSYKAFLRGECGDCGSDGSQCALMGFQADQYEPFKNSNFSSMYLVTGSYPNFCVYEYRLRMLLENTDPGLEMHTKTGNLLLLLRGQRKPLFVPLRFFSMHSGKE	Lipase|PF00151.17	NA	NA	100
TRINITY_DN10762_c0_g1_i1	type:5prime_partial	468	GACCGTAGAGGAAATATCAAATTATGTGATTTTGGTATAAGTGGTCAATTAGTTGATTCTATAGCAAAAACTAGAGATGCTGGTTGTCGTCCTTATATGGCACCTGAAAGAATTGATCCAGGTAGAGCCAGAGGTTATGATGTGAGGTCTGATGTGTGGAGTTTAGGAATAACTTTGATTGAAGTGTCTACTGGAAGATTTCCTTATCCTAAATGGAATAGTGTTTTTGAACAGCTCACACAAGTTGTACAAGGTGATCCACCTCAAATCAGTCCAAATGAAAATGGAAATACTTTTACTTTAGAATTTGTAAATTTTGTCAACACTTGCTTAATTAAAGAAGAGCAACATCGGCCTAAGTATAAAAAACTTTTGGAACATCCATTTGTTCTTCGTTCA…	DRRGNIKLCDFGISGQLVDSIAKTRDAGCRPYMAPERIDPGRARGYDVRSDVWSLGITLIEVSTGRFPYPKWNSVFEQLTQVVQGDPPQISPNENGNTFTLEFVNFVNTCLIKEEQHRPKYKKLLEHPFVLRSERETVNLTEYIGRVLDKGSMSS*	Protein_tyrosine_kinase|PF07714.15;Protein_kinase_domain|PF00069.23	XP_006563748.1	261.2	198
TRINITY_DN10764_c0_g1_i1	type:internal	588	GCAATAGCAAGGTATATTGAAGTCGTACGGAGATTAGGAAAATTAGAATATGCTGAAATGTGTCTGAAGAAAGCGGAATCAGTTTCTTGCAATCTTAATATTGATCCTGGATATTATTACTGTAAAGGACTCTATGAATGGTATACAGGAAATACATCTGATGCTCTTAAGTGCTTTAACAAAACTCGTAGCATTCCATTATGGGGGCAAATATCATTATGTCACATGATAGAAATATGCATTAATCCTGACAATGAAAATTTTTCTGGAGAAAATGTTGATGTAGATGGAGATTTGATTTTAAAGGAGAAAGCAGTTACTTCTCAAGAAGGCAATATACGTACAGCAGAAAAATTGCTTCTAGAATTGAAATCAAAGTATGGTGCAAATTTGAATACT…	AIARYIEVVRRLGKLEYAEMCLKKAESVSCNLNIDPGYYYCKGLYEWYTGNTSDALKCFNKTRSIPLWGQISLCHMIEICINPDNENFSGENVDVDGDLILKEKAVTSQEGNIRTAEKLLLELKSKYGANLNTRVFNNLIRLAKRNKLDAEAALNDFIEILTDERYKDHAGAILGSAMAYLVLKQTPRARNQLKRI	Tetratricopeptide_repeat|PF00515.26;PPR_repeat|PF01535.18;Tetratricopeptide_repeat|PF13174.4;Tetratricopeptide_repeat|PF14559.4;Tetratricopeptide_repeat|PF07719.15	NP_079029.3	101.3	340
TRINITY_DN10768_c0_g2_i1	type:internal	489	TTGTTCCTCCTCCTATGTGTGGTTACATGTTTACTGTCGCTTCTTCCATCCAGTCTGTGTTTTTTTGCTCCAAACATTCCTGCATTTGCTGCATATCTTGCAAATTGCAAGTTGATGATTTTTAAGAAAGATTCCTCTTCTATTACGCATGAAGGCTGTGATTTAAAATTAGTTGCTGCTGGTGGCAATGGATTTAAATCACAAGTTCAACCATATTCACTACATGCTTGTTACGACATTAAGTTAAGTAATGATTGTCCATCAGTGTTTGAATTTTACGATTGGACTTGGACTGAAAAAAATATTCTGTGTGTTGGTTGGTGTAAACAAGATAGTAAGAATGCTAAATACTACATTATATCATTCGATACTCCTACTTCATCTCTTGATTCAAATCTC…	LFLLLCVVTCLLSLLPSSLCFFAPNIPAFAAYLANCKLMIFKKDSSSITHEGCDLKLVAAGGNGFKSQVQPYSLHACYDIKLSNDCPSVFEFYDWTWTEKNILCVGWCKQDSKNAKYYIISFDTPTSSLDSNLQIVGRILTQFDNSIIGMCSNENGNIVAVQL	NA	NA	NA	167
TRINITY_DN10803_c0_g1_i1	type:internal	567	AAATATGACAGCCCTGAACAAGTTTTGAGAGAATTTTATGAGGTACGTTTTGCATTGTATGAACGCAGAAAAGAATACATGGTTGGTGTGTTGGAAGCTGAGGGTCTCAAACTTAAAAATCAAGCAAGATTCATTCTAGAAAAAATTGAAAACAAAATATCAATTGAAAATCGTCGAAGGGCTGAGATGATCAAGACTTTGCAAGATCGAGGTTATGACTCTGATCCTGTCAAAGCTTGGAAAGAAGCACAGAAAGAAAATATTGACGAGGAAAAAGCTTCAGAATCTGATGATGAAAAGGAAATAGAACCCTCTGGCCCAGACTATGATTATTTATTGGGTATGACCTTGTGGAGTTTAACTCGAGAGAGAAAGGATGATTTGTTGAAAAAACGAGAT…	KYDSPEQVLREFYEVRFALYERRKEYMVGVLEAEGLKLKNQARFILEKIENKISIENRRRAEMIKTLQDRGYDSDPVKAWKEAQKENIDEEKASESDDEKEIEPSGPDYDYLLGMTLWSLTRERKDDLLKKRDEKIKELDDLKSKSPSDLWRNDLKEFMEELDKVEKEQKEDEVGSSKLKKKNNWKEEV	ENT_domain|PF03735.12;DNA_gyrase/topoisomerase_IV,_subunit_A|PF00521.18;MnmE_helical_domain|PF12631.5	EAW60661.1	204.9	105
TRINITY_DN10816_c0_g1_i1	type:5prime_partial	417	GCATGTATTAGTCAACGGTGGGAATTATCTTTGGAAAATAATAAAATTCCTACTCTTGAGGAATTTAGAGTTTTCATTGAAAGGGAAGCTCGTGGTCTGAATGAGTTAAAATTTGTAAAACCTAACATTAAGAAAGGTAATGTTAAACCATTAAATTCATTTAACAAATCAAATGTAAATACTACTGTTGTCAAATGTAACCAAGTAAAATCAGGTGTAAAACCAGATGTTGTTAAAGGTAACAATTGCATTCTATGTTATCAAAGCCATGCCTTATTCAAATGTCCAACTTTTAATTCTATGAATGTAAATGAAAGATGGCAAGTGGTACAGAACAATAATTTATGTACCAATTGTTTGAGGAGTAACCACAGGCTTGACACATGTAGAATAGGATTC…	ACISQRWELSLENNKIPTLEEFRVFIEREARGLNELKFVKPNIKKGNVKPLNSFNKSNVNTTVVKCNQVKSGVKPDVVKGNNCILCYQSHALFKCPTFNSMNVNERWQVVQNNNLCTNCLRSNHRLDTCRIGFSQKLF*	NA	NA	NA	168
TRINITY_DN10817_c0_g1_i1	type:5prime_partial	354	CATGGAGGTCCATTGCATGAATGTAATATTTATAAGCAAAAGAAGGCTGGAGAATTGCTGGCAAAACTACTGAAACAGGGAAAATCCAAACCCTGGAAGGAAATATTAAGCGAATTTTCAGATAAGAAATATACGAAACTGGATGCAACCGCTTTAGTAAACTATTTTAAACCTCTTATGCAGTGGTTACAAAGAAAGAACATGAAAGAGTATAAAGGATGGAATAGCACAGATCCAATGTTTTGTCCTGGAGCCATTGATTCTGATATAATGTTACCAGTGGAAGATATAATAGCAGCATCACCAAATATTAGCACAATATCCAGAACATTTAATTATCGTAAAATCCGATAG	HGGPLHECNIYKQKKAGELLAKLLKQGKSKPWKEILSEFSDKKYTKLDATALVNYFKPLMQWLQRKNMKEYKGWNSTDPMFCPGAIDSDIMLPVEDIIAASPNISTISRTFNYRKIR*	Angiotensin-converting_enzyme|PF01401.16;Protein_of_unknown_function_(DUF2711)|PF10924.6	AAR85358.1	80.5	86
TRINITY_DN10828_c0_g1_i1	type:complete	600	ATGTCTATGAATATGTTATTTATGAAGATCATAAGACCAAGAACTTTAAATTTTCGCAATTTTGTTGCAATTAGAGGTTTTAAAAGTGAATATTCACTTGATCGAATTTATCCAACTAGTAGTCTAGATATTTCGAAACCCAAGGAAATCAAAAGTAATCCTGAAAAATTTTCAGGTCTTGTTCCATTAGATAAACTTCAAATAACATATTCAAGAAGTAGTGGTCCTGGCGGACAAAATGTAAATAAAGTTAACACCAAAGTTGAAATACGTTTTCATGTAGATACTGCATCTTGGATACCACTGGACACCAGAGAGAAATTAGCAAAATTACATTACAATAAAATCACAAAAGAGGGCTTCATGGTATTAAGGTCAGATAAGACCAGGCTTCAAACC…	MSMNMLFMKIIRPRTLNFRNFVAIRGFKSEYSLDRIYPTSSLDISKPKEIKSNPEKFSGLVPLDKLQITYSRSSGPGGQNVNKVNTKVEIRFHVDTASWIPLDTREKLAKLHYNKITKEGFMVLRSDKTRLQTLNLADCMDKLRCYIREAEKPPPEVLPETLALRKKRQEKAAAERLREKRHSQEIRRMKNDGLNNFQI*	RF-1_domain|PF00472.18	XP_001654462.1	173.7	6019
TRINITY_DN10839_c0_g1_i1	type:internal	399	AGCAGCAAAAAATCCGTCAAAAGTTCCGACTCCAGCAAGAAAAGCAGTGTCGGGAACTCTGATTCTCATCGCTCCAAACACAAACTGTCCGTCGTACCCGACCCTGAGCCTTCAGGCAAGGGCCATCCGCTGAAGCAAGCCAAGGCGGACAGTTCCGAATCTCTGGACCAGACCGGCCGTAAAACCTCGCGGGCTGCTGCGGTTGCCCCGGCAACGGGATCCACCCCTCCCTCCCACCTCAGTAAGAAGACACCATCGGGCGGTAACAGTAAGCAGCAAAGTGGCAATAACCGATCCTCCAGTAGTACTCCCTCTTCCGCGAAGAAGGGCGGCGATGCCCCTGCCGAAGAAGTGTCGCAGTGCCAGCCCTGCTCGGAGCGCCACCCCGTGGCCGATCCC	SSKKSVKSSDSSKKSSVGNSDSHRSKHKLSVVPDPEPSGKGHPLKQAKADSSESLDQTGRKTSRAAAVAPATGSTPPSHLSKKTPSGGNSKQQSGNNRSSSSTPSSAKKGGDAPAEEVSQCQPCSERHPVADP	NA	NA	NA	72
TRINITY_DN1083_c0_g1_i1	type:complete	570	ATGAAGATCTACAGTCGCCTTAAGAACATTGCTGATCAGTTATTTTCGAAACACCTTTTAGTTACAAATACTTCTTTAGGGATTTTTTTCCTTGGACTGGGTGATGCAATACAACAAAATATCGAGAAGAAATTGTATCTTGGAAAAGAATATGAAACAAAAAGAACTCGTAACATGATGGTTTCTGGTAGCATATTTGGTGTTGCCGGACATTATTGGTATCAGTTTTTGGATAGAAAATTTCCAGGTACAACAGTGAGGCACGTTGCCAAGAAATTGCTTTTAGAAATGGCTATAGGACCACCAGTGTTTTTTGGATTTTTTCTAGCTATTGGCTATTTAGAAGGAAAACCAGTTAAATCAAGTGTAGAAGAATTTAAGAAAAATGCATTAGTCATA…	MKIYSRLKNIADQLFSKHLLVTNTSLGIFFLGLGDAIQQNIEKKLYLGKEYETKRTRNMMVSGSIFGVAGHYWYQFLDRKFPGTTVRHVAKKLLLEMAIGPPVFFGFFLAIGYLEGKPVKSSVEEFKKNALVICAADWAVYAPLQAVNFFYVHPKYRLLYVCVLCLAYDVFMSYILHKEDNMRLHGRKE*	Reactive_mitochondrial_oxygen_species_modulator_1|PF10247.7;Mpv17_/_PMP22_family|PF04117.10;Predicted_membrane_protein_(DUF2085)|PF09858.7	XP_001649766.1	112.5	1866
TRINITY_DN10862_c0_g1_i1	type:internal	318	ATAACGTTGCTTTTCATCTTGGGATTTGCCCATGCGCTTAATGCCGCGGCCCTCCTCGAGTTTCCCGACCTTACCCGCCGCCTTCCAGAAAGAAGGATGACACCCGGTTGCGCTTATAATGGAGGACGCTATGATCATGGTCAGCAAGTGGAAACGGCCGAACCATGTTTAAATTGTACATGCATTGGTGCCATTGTCATCTGCTATCTGAGAGTTTGTCCACCACCATTAGCCCCACCACCAGGATGCTTCTTGGCTAGAGAGGTTGGTCAGTGCTGTCCAACTTTAGTATGTGGAAGTGATGAAAAACCAAAACAG	ITLLFILGFAHALNAAALLEFPDLTRRLPERRMTPGCAYNGGRYDHGQQVETAEPCLNCTCIGAIVICYLRVCPPPLAPPPGCFLAREVGQCCPTLVCGSDEKPKQ	von_Willebrand_factor_type_C_domain|PF00093.16	XP_001651055.1	23.1	106
TRINITY_DN10863_c0_g1_i1	type:internal	726	TTTTTCCCATCTGAAATCTATTGGTCACGTCATTTTGATAAAGAAAATGAAGCACCAGTCCTTCATCCTATAGAAACTCAGACAGATTTGGATGATGAGAATGTTTCTCTGAAGGGCTTAATTAATAGTAAGAATGTGGAAATTTTACCAAGTCATCCATTGACGAACTTCAGAATAACAGATATATTAAATTCTTCTCAAGAAATGCAGGCCTTGCTTGCTGATTTTAGAGCTCGAGGAGGAACTATAAAATATCTCTGTCCACATGAAAAAGCAGCCAAAGAAAAAGAAAAAAAGCTAACTACTATACATCAGAATAAAGAGCATACAAGGTCTGAAATGAATACTAATACTGGACTCTGTTGGGAAAAAAAGACTGATGCACTTGACCCATATAAC…	FFPSEIYWSRHFDKENEAPVLHPIETQTDLDDENVSLKGLINSKNVEILPSHPLTNFRITDILNSSQEMQALLADFRARGGTIKYLCPHEKAAKEKEKKLTTIHQNKEHTRSEMNTNTGLCWEKKTDALDPYNHQTLAVLFSSYSCASDNAPNYCVNPWVVKMEFYGSNDITLGGFLDRYCFRSSYICPSATCITPMTEHVRKFVHGSGCVHILLHELSSGVPMSENNILMWSWCHICTKAT	NA	NP_001192396.1	169.1	350
TRINITY_DN10865_c0_g2_i1	type:5prime_partial	609	CATTCAGCAAGCACTGATTATTTTACTCCAAAAAATGTTAATAATTCAGTCCCTCAAAAGAAAGCTTCAATCATTTCCAAAAGTAAAATTTTAAGAAAATATAAAAAGTTAAGTTATTTAAAAAATATTAAATTTGCAACCCATAAAGTAATCTTTTCAAAAAAGCATGAAGGCATGAATAAAATGTATTTTAAGAAGGATGCTGTGTCAAGTTACAATGAAACCATTAGCCATCCATTAACTTCAGAAGATGTAAAACCTCCAACAGTTCTAGGACCTTTCAAAAAGTTAAGTCCAACAATTTGTGAAAATACTGGAAAGTTTAAGATAACTCTTGCAAGTTCTGCTCAAAATGTAGGGCATATCTTAGCCCCAGTCACTAAGTCAGATTATAAAAAA…	HSASTDYFTPKNVNNSVPQKKASIISKSKILRKYKKLSYLKNIKFATHKVIFSKKHEGMNKMYFKKDAVSSYNETISHPLTSEDVKPPTVLGPFKKLSPTICENTGKFKITLASSAQNVGHILAPVTKSDYKKPTDVPEAVFGKISLFLKSKVMLKCKDLNPQHQKDKADQLALAFIETNTVNALDRKTMKLLNEYAENCIY*	NA	NA	NA	349
TRINITY_DN10884_c0_g1_i1	type:internal	384	CAAAAGGTTTTATTTAAGGAGTTATTTTACTGTATCATTGACTACATCAGTGATTTAGATTTTTCTCTGGATGGAGACCTTTGGATGGAAGCTATTAAAAATTGTATGGAGATTTTTTACGATTATAGTTTATATGATTCAGAAGTATGCTCTGGGATGATATTGGAATGCCTATCCTGTAATTTAGCTGTTTTAAATGGTTCACAAGTTTTATCCTTTTGTCAAAAGAATAACATTCCTATCAGTTCTGAAGCAATATCATCGTATGTAAAAGTTATGAAACCCACTGAGATGTCTGTGAATGAAATTATTTCTTTTCTGGAATATGAGACTAAGGTGTGCAAGCAACTGGCTTCAAAACCTCTCATACACGAAGTCCTTGAA	QKVLFKELFYCIIDYISDLDFSLDGDLWMEAIKNCMEIFYDYSLYDSEVCSGMILECLSCNLAVLNGSQVLSFCQKNNIPISSEAISSYVKVMKPTEMSVNEIISFLEYETKVCKQLASKPLIHEVLE	NA	NA	NA	156
TRINITY_DN1088_c0_g2_i1	type:internal	363	AGAACAGATGTTCAGACGTGCTCATTATCAAACGGTGAACCCAGAAAACCTCGAGAAAATAACCCGAATAAATCGTCTCATGATTCAGCAACTGTAGGATATTTAAGAGGTCGACAAATACCTTTGAGTGAAGTTAACACTAATACCAGCCGAAAATTTTTCAATAAGAATGAAAACGGCATCACAAATCGAAATCGCATTTTCCAAAAGACCAGTGAAAACGTGATTGCGACTTCTCCAAATCGCGTGATCAACGATGATTTACGAAATACAAAGGATATATATTCCCGGAAATGTTTGTCGTCTAACTTAGAAAACAGTAATGGAAAAAGCCATAAAAATGGCTCTAACAAAATATATGCC	RTDVQTCSLSNGEPRKPRENNPNKSSHDSATVGYLRGRQIPLSEVNTNTSRKFFNKNENGITNRNRIFQKTSENVIATSPNRVINDDLRNTKDIYSRKCLSSNLENSNGKSHKNGSNKIYA	NA	NA	NA	108
TRINITY_DN10919_c0_g1_i1	type:5prime_partial	993	AGACTTTCGAATACGACTTCTGAATTGATTCCTCAGTTTGGGAGTGGCTCGGTTATTATCTGGGAAGAAAGAGTTCCAAAATCTATCATGTATCAACTACTTATCATTGCATCCATATTTGTGCCTATACTATCATTTGAGTCTCATGAAAACACTTTGTCATCTAGTCAGTTGTTCACATTTGCTCAGCCACAGTCATTCCTTCAACTAAAACCAGAATGGTCTTTGCCTGCCATAAGAGAAGTTACATTTAAATTTCGGACAGATCGTCCTCATGGTTTGCTTCTTTTTCATGGTTCCATATCAGATGTAGGAACATTTCCTCTTTATGAATTGTATGTCATGTTAGAAAATGGACGTTTAAAAATCATTCATGTTTTTCTTAATGACCAAGATGAA…	RLSNTTSELIPQFGSGSVIIWEERVPKSIMYQLLIIASIFVPILSFESHENTLSSSQLFTFAQPQSFLQLKPEWSLPAIREVTFKFRTDRPHGLLLFHGSISDVGTFPLYELYVMLENGRLKIIHVFLNDQDETFFIGKGLNRDKWHHVTLRINPGTAHLSVRVDAHEMTVSLPSLSHNPSYGIVDNIPETVMYFGGLDPNNYATNQKYNYVRFIGCLGNIMFSQSGNPLSPTKIILDNQLFHGCVDQCDITNPCLYNGRCINHYTHTSCDCFGTGHEDKICFSADPVSVTFRGYSYITYRVYDWRDRVHSEAGRISFSFRTFFEDSVLV*	Laminin_G_domain|PF00054.21;Glycosyl_hydrolase_family_65,_C-terminal_domain|PF03633.13;Laminin_G_domain|PF02210.22;EGF-like_domain|PF00008.25;Human_growth_factor-like_EGF|PF12661.5	XP_001649440.1	173.3	878
TRINITY_DN1092_c0_g1_i1	type:internal	540	TTTTTACAGTTTGAAAAAACAAAACCAAAGTATAAAAAAGCCAAGCCAGCATTAGTATATTCAATTCTGAGAAAGGGTAAAAATGGGAGTACTGCTTCCATAGAGCAGATATTGGAAAGAATTAAAGAAATCCTTTCAGAATTAGAGATTTTTTCAAAATTTATCAAAAGTGCTGAAAATTATGCTGAAGTTCAAATTACTTCGAATAAAAACACATGGTCTCATCAAAGACGGAAGAGAAGGGAGGAATTAAAGTCTAAAATGCAGGAAACAAATAAAAATAATGAAATTTCTCCTCAGACCGATGTTAGTATGTTAGATTTGAATGATACAGCATCAGAAACAGAAAATAAATTTAACGAAACCTTTAAAAATGCTGAAGTTAAAGATAGTCAAATA…	FLQFEKTKPKYKKAKPALVYSILRKGKNGSTASIEQILERIKEILSELEIFSKFIKSAENYAEVQITSNKNTWSHQRRKRREELKSKMQETNKNNEISPQTDVSMLDLNDTASETENKFNETFKNAEVKDSQISVSVTDKTDVKESIDNPNDSLSTTKSEFSVHSKGENIYQSDDTQPEI	Protein_of_unknown_function_(DUF3970)|PF13113.4;LAGLIDADG-like_domain|PF14528.4;Ribonuclease_HII|PF01351.16	NA	NA	277
TRINITY_DN10939_c0_g1_i1	type:internal	351	CAACAGTTACCACAATTCCATTTCCATGTTGCTTCTCCAGTTGTCAAACCACCACCTCCTATTATGAGTAGTGTTGCTAATATACCTCAAGGTGTGCCTCTACCACCACCTCCTCCACCTCCTGTTAGTCTACATCCTCCTCAGCCTGTAATACCACCTCCTAGTACCTCCTTATCAATGCCAAGTCCTTGGCCCAAAACTGTTGGAGTTCCTCATGCCTTTCAAATACCTTTACCAACATCTGCTCCATTTTCTGCTTCACCAAATGTTGTTCCTTCATTAGTTGCTCCAGCTGTGTCTAATGCAGCTCCTGTAACATCTCAATCTACATTGAAAAGTTTATTAATGAAA	QQLPQFHFHVASPVVKPPPPIMSSVANIPQGVPLPPPPPPPVSLHPPQPVIPPPSTSLSMPSPWPKTVGVPHAFQIPLPTSAPFSASPNVVPSLVAPAVSNAAPVTSQSTLKSLLMK	NA	EAX07174.1	61.6	89
TRINITY_DN10962_c0_g1_i1	type:internal	744	CTGTCTCTGTCTTGTATCTTGATATTAACACTAGTTCTGTTAATACTTGTAGGAATAGCCTTTAAGGGTAAGAGTTCCGACGCCTCAGATTCAAAAGAAAATCTTAGATGTTTGAATGCTGAATGTATAAAGACAGCTGGTCACATCCTTTCCTTAATGGACGAAAGATGGGACCCGTGTTCGAATTTTTATGACTATGCCTGCGGAAGCTTTAACGAAGCTTCAGGACATTCCATTGCTCAAAATTCCATTGATTCAGTTTACTATTCTATCAAAGACCTCCTAGAATCAAGCTCTGACACAGATAACCTTGCAAGTTTGAAATCTTTTTACACAAGTTGCATGGAATTTGATGGTCTGCACAGCAAAAGGCAAGATACGTCCAAGTTGTTTTTGGAT…	LSLSCILILTLVLLILVGIAFKGKSSDASDSKENLRCLNAECIKTAGHILSLMDERWDPCSNFYDYACGSFNEASGHSIAQNSIDSVYYSIKDLLESSSDTDNLASLKSFYTSCMEFDGLHSKRQDTSKLFLDLMERFGIGTWPVLDDYYEAKSSLAEVLSALTLVGVPVAFRVEVVPDTQIEGSYLLKISPGGPLESGRTAIDIRSDQDLRTYMLFSFLLLGTSTYSKSTRAVDDILSVDAYYAHVE	Peptidase_family_M13|PF05649.11;SchA/CurD_like_domain|PF04486.10	XP_001650510.1	55.5	563
TRINITY_DN1097_c0_g1_i1	type:complete	306	ATGGCTGGACTCGGCAAACGCTTAATTCCATTGCTGGACAGAATTCTGGTAGAGCGTTTTGTTCCAGAAACTAGAACAAAAGGGGGTATCATGATACCTGAAAAAGCACAAGCAAAAGTTCAAAGTGCAACTGTGGTTGCTGTTGGTCCAGGTGGAAGGAATGAAAAAGGTGAACATATTCCTCCAAGTGTGAAAGAAGGCGATAAAGTTTTACTACCTGAATATGGAGGAACTAAAATAGAAGTAAATGAAAAGGAATTGTATATTTTCAGAGATAGTGATATTCTTGGTAAATGGAGTGATTAA	MAGLGKRLIPLLDRILVERFVPETRTKGGIMIPEKAQAKVQSATVVAVGPGGRNEKGEHIPPSVKEGDKVLLPEYGGTKIEVNEKELYIFRDSDILGKWSD*	Chaperonin_10_Kd_subunit|PF00166.19	XP_002433721.1	175.3	5441
TRINITY_DN10991_c0_g2_i1	type:internal	501	CAATCTCTTCTTCGTTTGTCCCTCTACGGAAACCGGATCAAGTTTATCGACAACCTTGCATTTGTGGGTGTGGGCCGGAACTTGACCCGCATCAACCTGGGAGCCAACCAGCTGACCGCTGTCCCTTCCAGGCCCCTGAAAAACCTCGCTCTTCTACAGAGACTGCAGTTGCACGAGAACCATATCGAGGCACTGCTGCCAGAAGAGTTTGCCATGATGGGTGGAGAGTCCCTGGATGTGCTTGATCTCGCCAACAACAGGGTTCAGATCTTGCCCCCGAGAGCATTCATGTCTTTGCAAGTTCTCAATTCTCTGGATTTGGAGAGGAATCTTATAACCAACATTCATGTTCATGCTTTTCAAGGCATTGAGGATTCGTTGGAATGGCTGAAGCTTGGC…	QSLLRLSLYGNRIKFIDNLAFVGVGRNLTRINLGANQLTAVPSRPLKNLALLQRLQLHENHIEALLPEEFAMMGGESLDVLDLANNRVQILPPRAFMSLQVLNSLDLERNLITNIHVHAFQGIEDSLEWLKLGVNRLEEIPSQPLKNLSRLRQLDLRGNNISKVKED	Leucine_rich_repeat|PF13855.4;Leucine_Rich_Repeat|PF00560.31;Leucine_Rich_repeat|PF13516.4;Leucine_Rich_repeats_(2_copies)|PF12799.5;Leucine_rich_repeats_(6_copies)|PF13306.4;Leucine-rich_repeat|PF14580.4	XP_001651712.1	137.9	120
TRINITY_DN11013_c0_g2_i1	type:internal	441	AAAGTTAAGAACGACAATAAAAAACCTGAAGGTAATAAGAGAGAAGTCTCTAAACGAATTCTTGAAAGGAAACTCTTATCTAATACAACTAAAAAGCTTCACGTGGAAAAGAAAAGCATTCAAAGTTCCACTGTCAATGAAGATGCCGATACTTCTTCACCTTCCAGAACAGTTTCGAAACCTAAAGGAGATTCCTTGAAGAAAGGTGGAAATCTTAAAAAAGAGCCATCTGTAGAGAAGAAGAATTCTTCAAAGGGCTCAGAGAAAAAAATAATAAAAGTAGAATCGGATGATACACTATCAGAATCGGAAGAGGATTCCGACTTGGAACGGGCTGACAAAATGAATCTCGTTTCGAAAATGCAGCGGCCAGTATTTAATAAAAGGAATAGGAGGTTT…	KVKNDNKKPEGNKREVSKRILERKLLSNTTKKLHVEKKSIQSSTVNEDADTSSPSRTVSKPKGDSLKKGGNLKKEPSVEKKNSSKGSEKKIIKVESDDTLSESEEDSDLERADKMNLVSKMQRPVFNKRNRRFPSPSKLDNSKVLRR	NA	NA	NA	197
TRINITY_DN11019_c0_g1_i1	type:internal	465	TATTTGTTTTCTAAAGTTAAGAATGACAGTTTCAGACCAGTTATCACATTTCTTCAATGGGATAAGTCAAGTGACTTAGGAGATACTAATAAAGTGCAGAGCAATATTTTTGATAAACTATTGAAGGGTTTTCCATCATCATCTTCAAACTGTATTTGCTTAGTTGGACATCCAGAAGGAAAATTATTGTATTGCTTGTGTTCATTGAATATTAATGAACAGCGTCTTGTAGTTGATACTCAGCTTGAGGTTCTTCATGATATTAAACAACCAATTGCTGGCATTCATTTTCTGAAAGGATCTCATTGTATAGAAGGAAATGGCCTTTTATTAATTGGTGCATTAGGAAAAGTAATATACATAACTGCAGAAAGTCTCTTTACTAATTCTCTTGTTATT…	YLFSKVKNDSFRPVITFLQWDKSSDLGDTNKVQSNIFDKLLKGFPSSSSNCICLVGHPEGKLLYCLCSLNINEQRLVVDTQLEVLHDIKQPIAGIHFLKGSHCIEGNGLLLIGALGKVIYITAESLFTNSLVINIKKELFYVTTLYLMANVKKYV	16S_rRNA_methyltransferase_RsmB/F|PF01189.15	NA	NA	80
TRINITY_DN1103_c0_g2_i1	type:internal	426	AAAATTCAAGATGAATCCATAAAGACTCTAAAAGAGTATAATATTCTTTTCGGTGAAGCTAAGAAAGGTGAAAAGAGAAATCAAGCAAGCCAGGATAATGTCCAAAATCAGAATTTATCTACACTTATCCATAAAGTCATTATAAAAATATTGATGGCATATCAAGATATTATTACTTCATCTGTTTCCTGTAATGAGAAAGATACTTCTGAAGATAATATGTGTCCAGATAATCTAATCACTAATAAAATATTGGTATATTTATCAGACTTCGAAAAAAATCTTCAGCTTCAGAGTATTACTAAGTTGATAGTGAAATTACAAAAGGAGTTGCAACAGTCCTTTAAATCTAAAGTTGATATTGAAGCTGTCGATGACAGTATAAGGCTGCTTCTTAAT…	KIQDESIKTLKEYNILFGEAKKGEKRNQASQDNVQNQNLSTLIHKVIIKILMAYQDIITSSVSCNEKDTSEDNMCPDNLITNKILVYLSDFEKNLQLQSITKLIVKLQKELQQSFKSKVDIEAVDDSIRLLLNLLPVFDQYF	DNA_replication_factor_Cdt1_C-terminal_domain|PF16679.3	NA	NA	117
TRINITY_DN11047_c0_g1_i1	type:internal	405	GTTACTGTGTTTGGCAGCATTGTTCTTCTTACTTCTTTGTTGGAAGTAGTATCAATTTTCATTTCACCTAATAATTGTATGAGCCATGTCAGTACTGTTCAACCTCTGTTACGTGGTATCTTTATATTGTTCCAGATTTATTTCTTGAAGAACTCGAAGGAAGTATTGGATGTTTTAGGGCATGTTCGAACTCTAGCTCTTATGCACCTATTTGCAACGAATATTGCTGCATGGATTCGATTGTTATTATGGGAAGGTATGAAAGATTGGGAAGTAGCAGTGCATGTCAAACACAATTCAAGTGTAATTTGGGATAAAAATGGATTGAATTTCACTGTTCATGCTTTGGAATCTGACACAAATGCTGAAAATATTAGTATGCACTATCCCAGTCATGTA…	VTVFGSIVLLTSLLEVVSIFISPNNCMSHVSTVQPLLRGIFILFQIYFLKNSKEVLDVLGHVRTLALMHLFATNIAAWIRLLLWEGMKDWEVAVHVKHNSSVIWDKNGLNFTVHALESDTNAENISMHYPSHVVH	Otopetrin|PF03189.11	NA	NA	38
TRINITY_DN1105_c0_g1_i1	type:internal	360	CTATATTCAGTGCACAGACTTGATCGTTTGACTTCAGGATTGTTAGTTTTCACAAAGACTATTAAAAAATCGCAAGAAATCAATGAGCAAATTCGAGAACGAAAAGTCAAAAAAGAATATGTATGCAGGGTGGTGGGTAATTTTCCAGATGGTATAATTCATTGCAAAGAGCCTCTTGAAATAATTTCTCCTAAAATGGGGATTTGTATTGTTAGTCCTACTGGTAAAGAATGCGAAACTATTTTTGAAAAACTAAGCTACAATGGAACATCCAGCGTTGTAAGTTGTAAACCTCTCACTGGTCGAATGCATCAGATAAGAGTACATCTGCAGTACCTGGGACATCCAATAATTAATGAT	LYSVHRLDRLTSGLLVFTKTIKKSQEINEQIRERKVKKEYVCRVVGNFPDGIIHCKEPLEIISPKMGICIVSPTGKECETIFEKLSYNGTSSVVSCKPLTGRMHQIRVHLQYLGHPIIND	RNA_pseudouridylate_synthase|PF00849.20	XP_001658535.1	186.4	115
TRINITY_DN11099_c0_g1_i1	type:internal	324	AGTGAATCCCTTGCTCCTGTGCCTTTACCTAGAAAGCGACTTAGCCCATTGAAAAAACAACAAGCAATTCCTGAACCAAGTCCTGTTGAAAAGCAGCAGTCATCTGTAGACACTGTTGACAGTGGGGTTTTTAGTCCTGGATTGAAAATGGAGGGCTCTATTGATACCACTGCACCACCATCACCTTTAATTTTTTCCCGATTGTCTTCTGTAGAACAAGAAGTTGTAAGCATTACTCCTAACCGTCCATCTCCAATTATTCAACAATGCACCAGCGAGTCGAGTTCCAGTGAAAATGAGGAAGAACGAAAAGCTCCCCCTCCT	SESLAPVPLPRKRLSPLKKQQAIPEPSPVEKQQSSVDTVDSGVFSPGLKMEGSIDTTAPPSPLIFSRLSSVEQEVVSITPNRPSPIIQQCTSESSSSENEEERKAPPP	NA	NA	NA	80
TRINITY_DN1113_c0_g1_i1	type:5prime_partial	852	ATTGTCATCATCATCATGGCGTTGGAAGCTTTATGCGGTGTTCCTCGTAATTTTGGATTTGGTTTAGCATCGGAAAATGAAAATGACTTAGTAAATTACTTCACTAATCATTCTGCTAATTTATCATGCCATTCTGAACTGGCTTTACCTCCTATGCGCAATCCAATCGATGCTTTCAAAGTATTTGAAAAAGATGAGCATGGGAAACGAATTGCATTGAAGTTTAATAAAGGTACAACTACTCTTGCATTCAAATATCAAGGAGGTGTAATTGTTGCTGTTGATTCCAGAGCCACTGGAGGATCATTTATAAACTCCAATCAAGTTGAAAAGATTATTGCAATTAATGATTATCTTTTGGGAACCATGGCTGGTGGAGCTGCAGATTGTGTTTACTGG…	IVIIIMALEALCGVPRNFGFGLASENENDLVNYFTNHSANLSCHSELALPPMRNPIDAFKVFEKDEHGKRIALKFNKGTTTLAFKYQGGVIVAVDSRATGGSFINSNQVEKIIAINDYLLGTMAGGAADCVYWERILSERCRIYELRNRERISVAAASKLLANIMFNYKGMGLSLGVMIAGYDKRGPGLYYVDSDGNRFPGNVFSVGSGATYAYGVLDGGYKYELSDEEAYELGRRAIYHATHRDAYSGGLIRVCHITKDGWKLISVQDCTDLHYKYQDEKMV*	Proteasome_subunit|PF00227.24	XP_970194.1	356.3	24337
TRINITY_DN11148_c0_g2_i1	type:internal	303	TGCTACATATTCTATTGGTTGTTGAGCCATCTAAAACATCCTGATTTAGCTGATTACTTGTCTGATGTGTTTCCGCCTCCTTTTATGTTTGTGTCATATCATCATGATGATCAGAAAGTCATTGGCATAAAGTGTTTTGATCATCTTCTTGATAATGTTCCTCCAAGTCTGATGGTATTAACTGGAAATGAAGACGCAATTTTTCACACCCTGCACCCTTTAATTCACTTGCATGAGAGACCTATAATTCAAGTTTTATTTTCGTGCCTTTTAAAATTGCCAATGATGAAAATAAAACAGAAA	CYIFYWLLSHLKHPDLADYLSDVFPPPFMFVSYHHDDQKVIGIKCFDHLLDNVPPSLMVLTGNEDAIFHTLHPLIHLHERPIIQVLFSCLLKLPMMKIKQK	Tti2_family|PF10521.7	NA	NA	90
TRINITY_DN11154_c0_g1_i1	type:internal	297	CAAGTAAACCACACATCCTGCCTGCCAGCTAGCCTCCTCGGCTACAGTTGCGAGGCGGACGGACAATGTCAAATTAAAGTCGCCAACAGCCTGTGCTCGGAGAAGAAGTGTCAGTGTCAACGTGGCTTCCTACCGCATCGCAAAGACAAGTGTCTTCCACCCGCCTTTCTCGGCCAGTACTGTGTGAAAGACGAGCAGTGTCATCTCTCTGATCTCAACAGCAAATGCCACTTCATCGTGCGCGGAGTGTACGGAAGGTGCCAGTGCGCATTCGGTTCTGGAGATCGGAAGAGCACA	QVNHTSCLPASLLGYSCEADGQCQIKVANSLCSEKKCQCQRGFLPHRKDKCLPPAFLGQYCVKDEQCHLSDLNSKCHFIVRGVYGRCQCAFGSGDRKST	NA	ABE73232.1	88.2	70
TRINITY_DN11172_c0_g1_i1	type:5prime_partial	348	GGAGATGTTAGTTGGAGTCACAATCCTTGTAAAGGACCTTCAGATCCCAATGAAAAGTTGTTTTTATTTGGTTATTCGTGCAAAATATTTCCAGATGATGAAAAAGCTACTTACATTGATCAAGGAAATCATTTGATTCCTTGGATGGGCGATAAATCTATAATGATTGATCGGTATGACGTACGTGGCTATTTTCATGACCTGAAACAATATGAACCGAAACCTGATGAATATGAAGATCCTTTTGATGAAGAAGAGAAGTTATGCAATGAAGAACGGTATAGATCCTTAAGATCTGATATGTCTGAAGAGCAGTTATATCAAGAAGTAATATTTGCATCTCCTTGA	GDVSWSHNPCKGPSDPNEKLFLFGYSCKIFPDDEKATYIDQGNHLIPWMGDKSIMIDRYDVRGYFHDLKQYEPKPDEYEDPFDEEEKLCNEERYRSLRSDMSEEQLYQEVIFASP*	Alternative_splicing_regulator|PF09750.7	AAH47839.1	112.8	254
TRINITY_DN11189_c0_g1_i1	type:internal	384	CCGATCTATGAACTAGAAGAAGTTCGCATAACGTATTCAAGATTACCCGCAATAGGAGACAGCTCGTTTTGGCCAGGGAAAAAATTAAAAATTCTTGATCTCAGTCATAATAATATCACTTTTATCCGAGACAAAGACTTTTTTGGCCTACAGAATCTTAAGATCTTAGATCTTAGTTACAATGGCATAGCTACATCTCCATCAGCACCTTTCAGACTTCTTCCGAATCTTAGAACTTTATCATTAGCTAGGAATAAACTACGGACACTTGTACCGAGATTCTTTTATATGCTGGCAAAACTTGAAAAGCTTGATTTAAGTGGAAATCCCTTGCGAGATATAGATCCAGAAAATCTTAAGGATGTCAGGCCTCTGAAAAGATTT	PIYELEEVRITYSRLPAIGDSSFWPGKKLKILDLSHNNITFIRDKDFFGLQNLKILDLSYNGIATSPSAPFRLLPNLRTLSLARNKLRTLVPRFFYMLAKLEKLDLSGNPLRDIDPENLKDVRPLKRF	Leucine_Rich_Repeat|PF07723.11;Leucine_rich_repeat|PF13855.4;Leucine_Rich_Repeat|PF00560.31;Leucine_Rich_repeat|PF13516.4;Leucine_Rich_repeats_(2_copies)|PF12799.5;Leucine_rich_repeats_(6_copies)|PF13306.4;Leucine-rich_repeat|PF14580.4	XP_319756.3	70.1	232
TRINITY_DN11196_c0_g1_i1	type:internal	357	TGCTCTTCCGATCTCACCTTTCGTTTCTGGAGATTTGGTCGCTGGGTTACAGTTTATGTGGATGATCTTCTTCCAACCAAAAAGAGGAAACTTATATTTTCAAGAAGTTCGGAACCCAGAGAATTCTGGGTATCACTTCTAGAGAAGGCGTATGCAAAACTACATGGTTCATATGAAGCTTTAGAAGGTGGCCAGGCGATGGACGCTTTAGTGGATCTAACAGGCGGATTAGCTGAAATGTATGTTTTAGAATCGGCACCTCCTCACCTCTACAACTTTCTGCTTCAAGCTTCTTCAAATGGAGCTTTCATAACTTGTTCGAGAAAAGGAGACTGGAAAGAAACCAGGAAAGCTGAA	CSSDLTFRFWRFGRWVTVYVDDLLPTKKRKLIFSRSSEPREFWVSLLEKAYAKLHGSYEALEGGQAMDALVDLTGGLAEMYVLESAPPHLYNFLLQASSNGAFITCSRKGDWKETRKAE	Calpain_family_cysteine_protease|PF00648.19	AAT77811.1	126.3	143
TRINITY_DN11202_c0_g1_i1	type:internal	393	CAAAATGAATTACAAATTAAAAGGCAAAACATTGGGACCATTGCAACAAATGTTAATTCTAATATGGAGTATTTTAATGGTACTGTTAATAGCTCAACTTCTGAACCTGATGAAAATATTTATACATCATCCATGAATGTTAATCAAAGTGATAATGTAAATACACAAAGTAAATCTATGTTATCTTCATTACTTTCTGATAACTCTTGCTGTGTTACTAAAGGACCAAATCATCATGCTCATAAAAACAGTACAAAAATGGTTTTGGGATCTGTAAAGACACATTCTAATGAAAATGGTTATGGAAGTATTGCTGGAGCTGAAGAGAATACCACTGTGCAAACTGGCACACAATTTCTTCATTTAGGAGTTAGAGAAAAGAAAAGAAATGGA	QNELQIKRQNIGTIATNVNSNMEYFNGTVNSSTSEPDENIYTSSMNVNQSDNVNTQSKSMLSSLLSDNSCCVTKGPNHHAHKNSTKMVLGSVKTHSNENGYGSIAGAEENTTVQTGTQFLHLGVREKKRNG	NA	NA	NA	276
TRINITY_DN11210_c0_g1_i1	type:5prime_partial	603	ACTCTCCGTCTACCAGATCCCAATGCACAGCCATCTTTTTTTGTATTTTACAACATGGTTACAACTGAAGTTCTGGCTGTTTATGAAAATTCATCCGACAAGCTTTTGTCAATTTTTGAGAACTTCTGTGATTACTTTCGAAACACTGCTTTACATGCACCCTTTCAATTGTCCTGTTCCCCATCTAACAATGTTTATGCTAAAACTTTACAGCTCCAATTCCTACAAACTATAATAAATGCTCGATTTGGTGGTCAGACTGAAGCTGTGAAACGCCTTCTTTCTCAGCTGCCAATTAGTTCACAGTCATATAGTGTAAGTCCTTATTTGGATTTGGAATTATTTAGTTATGATGACAAATGGATATCGGTAATGGAAAGACCAAAAACCTGTGGTGAT…	TLRLPDPNAQPSFFVFYNMVTTEVLAVYENSSDKLLSIFENFCDYFRNTALHAPFQLSCSPSNNVYAKTLQLQFLQTIINARFGGQTEAVKRLLSQLPISSQSYSVSPYLDLELFSYDDKWISVMERPKTCGDQPIRFYTRDTGLLRFKIFAGLYPNNHPVSARRLVAFTFHPYDPFAISVQRTNADYVVNFHLRHVHSD*	De-etiolated_protein_1_Det1|PF09737.7	NP_001248448.1	286.2	396
TRINITY_DN11250_c0_g1_i1	type:internal	369	GTTCAGACCGGGACCGTCGCTACCTATAGGTGCGACCCTGGTTTCGACCTACTGGGTCCTATCAGAAGACTGTGTGTAGAGAATGGAACATGGATCCCTATTGGAATCCCAGTCTGCGTGATGAATGTTGCAGCCGGTAAAGCAGCAATGCAGTCGTCCATTTTCTCCAAAGGTGTACCGCAGAAAGCGGTTGATGGAACCACGAGTCGCACGTACGGTTCAGATACTTGTACCCTCACTGAGGTAGAAGACACGCCATGGTGGTACGTCAATTTGCTGGAACCTTTCTTGGTACAGCTAGTGAGAGTGGATTTTGGCAGATCTTGTTGCGCCAATGGTGTTCCGGCAACAGTGATCGTAAGAGCGGGC	VQTGTVATYRCDPGFDLLGPIRRLCVENGTWIPIGIPVCVMNVAAGKAAMQSSIFSKGVPQKAVDGTTSRTYGSDTCTLTEVEDTPWWYVNLLEPFLVQLVRVDFGRSCCANGVPATVIVRAG	F5/8_type_C_domain|PF00754.23;Sushi_repeat_(SCR_repeat)|PF00084.18	NP_001096984.1	165.2	188
TRINITY_DN11267_c0_g1_i1	type:complete	687	ATGGGAGACGAAGATAAAAAGGAAAAGAAGAAGAAAAGTAAGAAGAAATCAACTCAGGAAGCTGATGCTTCTCAAGAAGGTGATGCTGCACTTGTTGATGAAGCTCCATCTTCCCAAGAAGTTCATGAAACTAAAGAGTCAACTCCAATACCAATTATCACTGCTCCACCAACGATCGAGAAAAAGTCTTCTACTAAACGAAAAGCTCACAGATGTGGCTCAAATGTATTCGCCATGTTTACTCAAAGAAAAGTGCAAGAATTTAAAGAGGCTTTTCAACTAATTGATCAAGATAAAGATGGTTTTATTACAAAATCTGATTTAAAAGTGACATTTGATCTATTAGGCCGTGAAGTAGATGATGAAGATCTGGAATCAATGTTAGCTGAAGCTCCAGGA…	MGDEDKKEKKKKSKKKSTQEADASQEGDAALVDEAPSSQEVHETKESTPIPIITAPPTIEKKSSTKRKAHRCGSNVFAMFTQRKVQEFKEAFQLIDQDKDGFITKSDLKVTFDLLGREVDDEDLESMLAEAPGPLNFTMFLTIFGERISGTDEEDVILSAFSVFDEGDGKMKEEVLKNSLRKRGDKFTDEEADICLKEAPVDKEGYISIRRFTQILTKGDEDDDADGA*	EF-hand_domain_pair|PF13499.4;EF-hand_domain_pair|PF13833.4;EF_hand|PF00036.30;EF-hand_domain|PF13405.4;EF_hand|PF13202.4	AAP20203.1	179.9	2264
TRINITY_DN11278_c0_g1_i1	type:internal	480	CGAACGGTATTTGTCGGAAATTTGCCTGAAAAAATTACTCAAGATATCATTAAAGAAGCATTTGAAAGATGTGGAGAAATATTCATTATTAGAATGAGTGATAAACGTTTTTGTCATATAAGATTTATGGATATGGAGTCAGTTGAACAAGCTCTTCTTCTGTCTGGCTATCGAATAAAGATTGAGAATAAGGATGAACCTGCTTACAATGGAAAGATTCATGTAGATTATGCAATTGCTCGAGATGATCAGCATGATTTTGAATGCAGGAAAAGACAAATGGAACGTGAAGAGAGGCACCGTCAGCTGAATACTTTCCGTCCTCCATCTCCACCTCAAATGCCTCATTATTCAGAACATGAAGCTACAGTCTTAAGTGAAAAACTTCGCAATGAAGAA…	RTVFVGNLPEKITQDIIKEAFERCGEIFIIRMSDKRFCHIRFMDMESVEQALLLSGYRIKIENKDEPAYNGKIHVDYAIARDDQHDFECRKRQMEREERHRQLNTFRPPSPPQMPHYSEHEATVLSEKLRNEETFKEGVRVLITWLERGECSKKKFWIIL	RNA_recognition_motif|PF16367.3;RNA_recognition_motif._(a.k.a._RRM,_RBD,_or_RNP_domain)|PF00076.20;RNA_binding_motif|PF08777.9;ATP_synthase_complex_subunit_h|PF10775.7	XP_971830.1	191.8	540
TRINITY_DN1128_c0_g1_i1	type:internal	669	CTATTCAATAAGCATATAGATGAGATTGACAAGAATGCCCAAAATACAGATTCTTTAATCAAAATTGAAAAAATGGAAGAAGAAATTTATACTTTGAATAACATAAATGAAGAATTGGAGCGAAAATACAGGTTTTCTCTTAAACAGTTAGAAAATTTTGCCAATCAGCAACAAAATGTTTCTGCTATAGAGAAAGAAAATCGTGAATTGGAGAAGGGTGTTGCTATGTTGAAACATGATCTAAAAGAGGTACAACGTAAGTTAGAATATGAAATAGAAAATAGGCGAAATGCCGAAGAAAAATTAGATCAGTTATCAAATAGAATAAAAGAAGAAAAAATGTTACGTGCCCAGGTTTCAGCTTCAAGCAGCCAAATGAGTGAAAAAGTTTTTAATTTA…	LFNKHIDEIDKNAQNTDSLIKIEKMEEEIYTLNNINEELERKYRFSLKQLENFANQQQNVSAIEKENRELEKGVAMLKHDLKEVQRKLEYEIENRRNAEEKLDQLSNRIKEEKMLRAQVSASSSQMSEKVFNLEKELKELNEKVKIETDNNLKLKKANAEALLCISTKEQNIHELHEKINSLHNVNVSKERTIRNLEMQFEERLAQASERTSELESRKHALDL	Protein_of_unknown_function_(DUF3251)|PF11622.6;PTS_system,_Lactose/Cellobiose_specific_IIB_subunit|PF02302.15;Protein_of_unknown_function_(DUF1664)|PF07889.10;F_plasmid_transfer_operon,_TraF,_protein|PF13729.4;Afadin-_and_alpha_-actinin-Binding|PF11559.6;Mnd1_family|PF03962.13;Uncharacterized_conserved_protein|PF10241.7;Uso1_/_p115_like_vesicle_tethering_protein,_C_terminal_region|PF04871.11;Pol…	AAK29628.1	90.9	232
TRINITY_DN11299_c0_g1_i1	type:internal	309	TTCCGATCTCTGATGGTTGTGCTATATCGTTGCATGTGTTCAAAGCATTATGCTGAATGGCGAACATCCTGGAAGAATTCTGCTGCTATAGATGGTAACAGAACAGGGTACTCTGAGAGTGCCGCTGATGCTAATCTGGTGATGGAAACTTTTCCTTTAAAATTATACGGTCATTCACAGGAACTGGAATTCATAAGTGCTGATGATGATATAGTTGTTAGCTCCTGTTTGGATGGGAATATCAATGTATGGGATGCAATATCTGGTGAATGCCGTATTTCCATAAAGCGTTCAAAGCATGGTTCAAAG	FRSLMVVLYRCMCSKHYAEWRTSWKNSAAIDGNRTGYSESAADANLVMETFPLKLYGHSQELEFISADDDIVVSSCLDGNINVWDAISGECRISIKRSKHGSK	WD_domain,_G-beta_repeat|PF00400.30	XP_001651291.1	43.1	46
TRINITY_DN1129_c0_g1_i1	type:internal	477	ACCGTTGTCTGTAAGCACTGGCTTCGGGGTCTTTGTAAAAAAGGCGACCAATGCGAATTTCTGCACGAGTATGATATGAGCAAGATGCCTGAGTGCTATTTTTATTCTAGATTTAATGCATGTAGTAATAAAGAATGTCCTTTTCTACACATCGATCCAGAAGCAAAGATCAAAGATTGCCCGTGGTATGATCGAGGATTTTGTAGGCATGGACCTAATTGCCGACACAGACATACTCGTAGAGTTATTTGTCCTAACTATATGTGTGGGTTCTGCATAGAAGGTCCCAACTGTAAGTTTATGCACCCTAAATTTGATTTACCTATACAGGACCCAGGCCAACAACCAAAAAAGAATACAATTACCTGTCATTATTGCTCAGAGCCTGGTCATAAAGCC…	TVVCKHWLRGLCKKGDQCEFLHEYDMSKMPECYFYSRFNACSNKECPFLHIDPEAKIKDCPWYDRGFCRHGPNCRHRHTRRVICPNYMCGFCIEGPNCKFMHPKFDLPIQDPGQQPKKNTITCHYCSEPGHKAISCPNLPPDVREEQGNRITLPEIGRA	Zinc_knuckle|PF00098.21;Zinc_finger_C-x8-C-x5-C-x3-H_type_(and_similar)|PF00642.22;C2H2_zinc-finger|PF16588.3;RNA-binding,_Nab2-type_zinc_finger|PF14608.4;Torus_domain|PF16131.3;Zinc-finger_containing_family|PF15663.3	NP_001040511.1	266.9	244
TRINITY_DN11310_c0_g2_i1	type:5prime_partial	480	CTAGAATTCGGTGATTTTTTTGATCACCTCATTCCATGGAACAATATAAGAACCTCAAAGAACGTTTTCCTCACTACATTCGAGGAAATGAAAAGGGACTTTAAGAGTCTAGCAATCAAAGTTGCCGAATTCATCGACGAAAATGAAGCAAAATATCTGAATGACAATCCCGTTACCTTGGAACGTATTTTGCATAACTGCACTTTCGAGGAAATGAAGAAATTCATTAACGATGGATTATCTTACTTATATAATGTTAAAAATAAGGAACTGCTTGCAGAATTACCTAAAGGTCGCCAACACATCATTGCATACAATGAAGCTTTACCTAAAAAGAAATGTGGTAAACTTAATTTCATTCGCAAGGGTAAAACAGGATCGTGGCAAGAAATGTTTACT…	LEFGDFFDHLIPWNNIRTSKNVFLTTFEEMKRDFKSLAIKVAEFIDENEAKYLNDNPVTLERILHNCTFEEMKKFINDGLSYLYNVKNKELLAELPKGRQHIIAYNEALPKKKCGKLNFIRKGKTGSWQEMFTPAQNEIFNTYITEKTKDSDVMMLWKK*	Tubulin-specific_chaperone_C_N-terminal_domain|PF16752.3;Sulfotransferase_domain|PF00685.25;Domain_of_unknown_function_(DUF3452)|PF11934.6	NA	NA	126
TRINITY_DN11344_c0_g1_i1	type:internal	606	TCTTCCGATCTTAAAAAGAACATTCCTTCTGCTGAACCTGAGAAAGATCCCAAAAAAATTATTATTGAAAATAAAATTGATTATGAAGATTTGAGAAATAATTCTAAGCAAAATGTTAGCTCATTGAATCTGACAAAAGTAAATCGATATCTTAGTGGTCCAACTCCTATCCTTGATACGAATAATGTATCGCCAGATGAAGTTGTAACAGCTGTTAATCATTTAAATAGTGCTATTCATCATTGGTCTCCAAATTTGCCAAACGTGATCTCTCCCAATTCTGCAATTGTGGCTCTTGGGGATGTATTACCAGGTGGGTCTTTGATGAAGAACATGGATGGTACACACTTAAAGGATTCTGTTCCAGTCGAAATTCAAACTGAAATGAAGCAGTTGTAT…	SSDLKKNIPSAEPEKDPKKIIIENKIDYEDLRNNSKQNVSSLNLTKVNRYLSGPTPILDTNNVSPDEVVTAVNHLNSAIHHWSPNLPNVISPNSAIVALGDVLPGGSLMKNMDGTHLKDSVPVEIQTEMKQLYCALSELLRHFWCCFPTTTPQLEEKVLSMQGSLQRFEYAKLQPFQEKLVRNCLQTQLCDHMRSLLLAAYK	Interleukin-3|PF02059.13	NP_001004596.1	156.8	285
TRINITY_DN11347_c0_g1_i1	type:internal	351	GCTCTTCCGATCTCGAAAATAAACATGGGTGGCGTGAAACGGCAATCTTCTGCTCGTGAGTTAAAATGGCAAAATTTCCAAGCAAAAAGGTCTGGCACAGTCGGGAAAAAGCCTCTTCCTGATCCCACCACATTAAAAAATGTTTTTTTAATGTTAATCATGCATGTCTGTCGGAAAATTGTGTTATTCGAGACTGAAATCAAAATTACCATATACCTTGCTGCTTTGGTGTGTGGATCCTTGGTTGGTGACTTTACTCCTGTACCTCGCTCTTACTTTTCAAGGAAGAATAATCTGTTTAACTATTATTTTGTTAAGTGGGGATGGGCATGGACATTAATATCAGAGATC	ALPISKINMGGVKRQSSARELKWQNFQAKRSGTVGKKPLPDPTTLKNVFLMLIMHVCRKIVLFETEIKITIYLAALVCGSLVGDFTPVPRSYFSRKNNLFNYYFVKWGWAWTLISEI	Inositol_phospholipid_synthesis_and_fat-storage-inducing_TM|PF10261.7	XP_001653861.1	105.5	318
TRINITY_DN11351_c0_g1_i1	type:internal	690	GTAGTGCAAGAAAATGGTGTATCATCTTTACTAAATTTATTAACGAATACTGTTAAGCCTATGTTATTGTCATTTAGTAATGACACTGCATTTCTTTCTTCTGTGCTGTTATTAGATTTCAAAGAAATATCTTCTGAACAGCAGATGGCTCATTTGTTACTGAAACTATTTGTTATCAGCATTTTGCATCAAAAACAAGATCAAATTGAGATTCCAGAAAGGACTGAAATATTTCAAAATATATGTTTATTGCTTCAAGCAAGTAGTCCAAGAGATGAGATGATGCTGGTTTCCATTAAAATTCCTTTCTCATTTTTCAATCAAGGAAAAAATTTGCTTGTATATCATCAATCACCAGAAGTAGAATCTGTCTCATTGTATCAACATACATTCATTCAT…	VVQENGVSSLLNLLTNTVKPMLLSFSNDTAFLSSVLLLDFKEISSEQQMAHLLLKLFVISILHQKQDQIEIPERTEIFQNICLLLQASSPRDEMMLVSIKIPFSFFNQGKNLLVYHQSPEVESVSLYQHTFIHVAEYCKKVSDSDLEKLEKFVVDVLNSSVSYLVFLLMSDIWIHRLRCSSTANLLVRCTSLSERCLKIPMNNLARLLLKRMMKFLPPDCKKKLFKQNQH	NA	NA	NA	259
TRINITY_DN11360_c0_g1_i1	type:5prime_partial	561	ATAAGTCAGTCCTTGTGGAAACTTTCTGCGATACAGGCACTTGTTTGCATAAAAAGTGTTAAACAGAGTGCAAAACTCAAGGCTTGCAAAAATAATATATATGATTCCATTTTCGAATCGTCTTTTCCGCTTGATATCCCAACTAACCTCAAAAAGAACGACAAACGCCTAATTGAAATGGAAATGAAAGCGTTAGAACACCGTTTGATGTTGGTTCTACTTTCTTTTCTTATTGTAAAAGAATTTAAAACGAAAGAATCGCCCTCAATCATCGACAATCTGGACGATTATTACAATTGCTTTCGAATCATGATAAGTGAACATTCAGAAATTAAACGTACTCCGGAGGTTTTGAGTACAGTTAACAATTTAGGCAGAAACTTTGAAAGAGTACACAGA…	ISQSLWKLSAIQALVCIKSVKQSAKLKACKNNIYDSIFESSFPLDIPTNLKKNDKRLIEMEMKALEHRLMLVLLSFLIVKEFKTKESPSIIDNLDDYYNCFRIMISEHSEIKRTPEVLSTVNNLGRNFERVHRFRRLIENNNKHIGQVWYGMFLARVHAGIMEGNIENVISKINDIGVAIEGVEVE*	NA	NA	NA	270
TRINITY_DN11378_c0_g1_i1	type:internal	468	GAACCAAATGATTCTGTAGTGTACAAGAAAGCTAAAGATTATACAAGCAAAGTGAAAGATGGAAGATATTATGATTGGTGTAATAAAGATGAAAATGTTCACAGTTTATTTAATTGCAATATAAAACATTGCGAAGGCTCAAAACATGCTGTGTTCAACCATAATGCTTCATTAGTTGCAGTTATTGGATCAAAGAGTTTACCAGATGGAGGAGCAAATGGATTTGTGTTGTTGTGGAGTTCTTCAACCTTTGATGAAAGTCAAGAATTAAATGGACATTCAGATGTTATTAATTATTGCTCTTTTAATTCTAAAGGAAATCTGTTAATAACTGCATCTGCTGACAAAACTGTGAAAATTTTCAAAATTGGAGATTCTCTTACATCAAGTGGGAATTAT…	EPNDSVVYKKAKDYTSKVKDGRYYDWCNKDENVHSLFNCNIKHCEGSKHAVFNHNASLVAVIGSKSLPDGGANGFVLLWSSSTFDESQELNGHSDVINYCSFNSKGNLLITASADKTVKIFKIGDSLTSSGNYTKKRASIPNLEPMKPNDNSIFTF	WD_domain,_G-beta_repeat|PF00400.30	WP_002742727.1	52.8	93
TRINITY_DN11388_c0_g1_i1	type:5prime_partial	330	GGAAATTTTCCTTATTGCAACACAGCCCAACCAGAGGAAACAGATGCTGCATTTAGGGAAAAGATCAAGAATATGGGGAAAGTTTCACGTAAGAAATTTACACAATTAGCAAAATTATTTTCCCGAAGAAAACGACGTTCTTTCAAACCTATACTTGGTGATGGTTCTAATCCATCGAGAGACAATCTGCTTCTCCATGAAGACGAATACTCTGAACTTTCTGAGGATGATTCAGAAAATGAAGTGAACAAAAAAGACACCTGGAACAGCCATGTGGGAGGACCTGGTGGTAGATCGCAGACAATTGAGCGATCGAAGATGGACTTGTAG	GNFPYCNTAQPEETDAAFREKIKNMGKVSRKKFTQLAKLFSRRKRRSFKPILGDGSNPSRDNLLLHEDEYSELSEDDSENEVNKKDTWNSHVGGPGGRSQTIERSKMDL*	TIP39_peptide|PF14980.4	NA	NA	232
TRINITY_DN11390_c0_g2_i1	type:internal	300	TTGAGGCAACTGGATGTAGAATTCATGAAAAGATTGCATCAGAAAGTTAATATAGTTCCAATAATTGCAAAAGCAGATACACTCACTCCTATTGAAATCCGGAAGTTGAAAGATACGATTTTGAGAGAAGTAGAAGAACATCAAATTAGAATTTATCAACTACCAGAATGCGACAGTGATGAGGATGAAGAATTTAAACAACAAGACAGGGAACTAAAAGAAAGTATTCCATTTGCTGTTATAGGAAGTACACAAATTGTAGAAATAAATGGACGAAAAGTTAGAGGGAGATTATATCCA	LRQLDVEFMKRLHQKVNIVPIIAKADTLTPIEIRKLKDTILREVEEHQIRIYQLPECDSDEDEEFKQQDRELKESIPFAVIGSTQIVEINGRKVRGRLYP	Septin|PF00735.16	CAH65017.1	150.6	166
TRINITY_DN11392_c0_g1_i1	type:internal	336	TTCCCAGAACCCAAGTCAATTAAAAACGTTCAACAATTTTTAGGTTTAACAGGATACTTTCGAAAGTTCATTAGATCTTATTCAATCATAGCTAAACCCTTTAGCGACTTATTACGTCATGATAATTATTTTATCTTTAAGGAACAACAGCGTATTGCTTTTCAGAAATTAAAAGATGCTCTCTTATCCGATCCAGTTTTGGGTATTTTTAAACCTTATGCTAAATTGCAATTGCACACAGATGCTAGCAAATACGGTTATGGAGCAATATTACTACAAGAATCGGAAGATGGACAATACCATCCCATCTATTACATGAGTAAGAAAACTCTCCCA	FPEPKSIKNVQQFLGLTGYFRKFIRSYSIIAKPFSDLLRHDNYFIFKEQQRIAFQKLKDALLSDPVLGIFKPYAKLQLHTDASKYGYGAILLQESEDGQYHPIYYMSKKTLP	NA	AAG24792.1	98.6	24
TRINITY_DN11403_c0_g1_i1	type:internal	468	GGAGGCTTATTACGACTGCTCAATCAGTTAAAAAGTTGTTATCCTTTATTCAGTGGTGATAATGGTTCTGCAATTTTGGGTCCTGATCCAATATCTCGTTCTGCTGAAGCCATTATGAGAATCGAGCAACTTCAAGAGGAGATAGAATCAGACTTAAAAAAAATTATTTCTTTATGTGATCAAAAATATAAGCCTACTGTGCAAGCAGTTTTGAACTCTCTCAGTAGTAAAGGAGATCAATTGACTAGAGTTTGTGCTCCTCATTTAGTGGAGGAGATTCTTTCTGTTTGGGATTCTTTAAGACCCAGTGCAGCTGTTGGTACTATGCACAATGTTAGTGGTTCTGACTGTAAAATTGACTGTACTGAAATACAGCTTAACTCCAATCGTTCTCCATCA…	GGLLRLLNQLKSCYPLFSGDNGSAILGPDPISRSAEAIMRIEQLQEEIESDLKKIISLCDQKYKPTVQAVLNSLSSKGDQLTRVCAPHLVEEILSVWDSLRPSAAVGTMHNVSGSDCKIDCTEIQLNSNRSPSKTSTQLSSPVHLHEKISQKSDVP	Protein_serine/threonine_phosphatase_2C,_C-terminal_domain|PF07830.11	NA	NA	144
TRINITY_DN11406_c0_g1_i1	type:5prime_partial	354	TATACTCCTCCTGATGAACCTCGATCATACACACCACCTTTGCCAACAGCACCAACAGATGATAAAAAATCATCTAATGCATCTGCAAATAAGCCTCCATGTGATAAATTAAAGAGCAAAAAAACCTTCTCTGACATTGCGATTGGAAAAAAGTCACTTTTTCCTGATAAGGAATTAAATTATGCCATATTTTCAGAGGAAAAAGATGATGATAAACCTTATGACCCTGAACAGGAAATTAATACCATGCTGTCTCATCCAAAAAATGAAAAAAATTCTATTTGTTTACAAGATGGTAAAGAAAGTCTTGTACCTGCTACTGCTAGTTTAGAAAAACACAAAAAAAATTCTTGA	YTPPDEPRSYTPPLPTAPTDDKKSSNASANKPPCDKLKSKKTFSDIAIGKKSLFPDKELNYAIFSEEKDDDKPYDPEQEINTMLSHPKNEKNSICLQDGKESLVPATASLEKHKKNS*	NA	NA	NA	96
TRINITY_DN1140_c0_g1_i1	type:internal	321	TTCATTACTCTTGTGCAGAAATTAAAATCAAGTTTATCAAGTAATTGCTCATTACTGCAAGAGAGAAATATGGCCTTAATTTCTTTTTTCATTGAAGATGCTGAAGAGAGTGATAAGTCTCCGTTAGTGGAAAGTATATCAAAAATGTTAAATTATAAAAAAGAGATTGAAAAACTTTGGAAACTGCTGGAGGAATTTCTTACTAAAGAGAGAAAGCTTTGGAATTATCTAAGTTCTGCTGTTGAAGAAAATCCACAAATCTTTGTATTAGAAGGAGAACTTCTTAAAATTTCCATTGATGATAATATCAAGGATTACTGT	FITLVQKLKSSLSSNCSLLQERNMALISFFIEDAEESDKSPLVESISKMLNYKKEIEKLWKLLEEFLTKERKLWNYLSSAVEENPQIFVLEGELLKISIDDNIKDYC	Coiled-coil_region_of_CCDC155_or_KASH|PF14662.4;Domain_of_unknown_function_(DUF1877)|PF08974.8	NA	NA	92
TRINITY_DN11425_c0_g2_i1	type:internal	591	AATGGAGAACAAGAGCAAGTGAAATTTTTTTGCTTTCAAGTAATTCTTCATTATGTTAAAACAAAGTATGCTTATGCAGATCCGGAGCAAAAGCAAATCATTCGAGAATTCGTTAAACATTGGATTCAAACTCAAAGCACTTTGGCACAACCTGATAGTGCCTTGATTCAAAATAAAGCTTCACAGATAATATGTGCAGTGTTCCTTCTGGAGTATCCTTCTCGATGGCCCACATTTTTTGATGATTTGTTACAGACATTGAATTTGGGAGTAACTTCCACCAGAATCTATTTACGAATATTGTTAGCTATTAATTCTGAAGTAGCAGACAGAGAAGTTTCTAGAAATCAAAAAGAATTTGGAATTTTTACTTTTATAAAAGATACAATGCGAGAAACC…	NGEQEQVKFFCFQVILHYVKTKYAYADPEQKQIIREFVKHWIQTQSTLAQPDSALIQNKASQIICAVFLLEYPSRWPTFFDDLLQTLNLGVTSTRIYLRILLAINSEVADREVSRNQKEFGIFTFIKDTMRETCITKLVDSWHHILVTYEKINTNLVCLCLEVIGAYIAWIEINLIANDRFVQIFITFLSIPLLRDA	Exportin_1-like_protein|PF08389.10;F-box_associated|PF07735.15	NP_001074525.1	195.3	272
TRINITY_DN11427_c0_g1_i1	type:internal	303	ACTTATCAGCAATATCGAGCACAAATTGCACAGTATATATTAGGTTATGTAGTTTCGCCTACTTTACTGGCAGTAAGCAACCAAAGTTCTCAAATACATTCTAATACATTATTATTGTCAAAAGATATATTGAATATAATGGATCCTATTTGCATGTTGAATGAATATGTACAAAAACATCAACTTAAAGCATTTACTTGGGAAGAGAAAAATGTGGGTACACCAAATTCACCCATATGGGAAGTCACTATGACTTTCCATGATGTTCTCCGAGTGATAGTTAGAACTGCCAGATCGGAAGAG	TYQQYRAQIAQYILGYVVSPTLLAVSNQSSQIHSNTLLLSKDILNIMDPICMLNEYVQKHQLKAFTWEEKNVGTPNSPIWEVTMTFHDVLRVIVRTARSEE	NA	NA	NA	62
TRINITY_DN11430_c0_g1_i1	type:3prime_partial	993	ATGGAAGTCGGGGATCTTGCGAAAGATGTGTTCTTGTACATATGGTACAGAAATAAAATCATTGAAGAACTGCCTGTATTATGTATGGATCCTCTCCTAGAAGCCTTTGTTGAAAAATTAAGGAACGCTATTTTAGTTGAAACATATGCTACAATGCAACTATGGATTAAGTTCTTGAGGAAACATTCTAATCGTATGATTAGTTCTCCGACGTTGTATGCTAAATATGTCATATTCGCTTGTTATTTACTGAAAAAACACTACCAAAATGGATTCGAATGCTTCTTGCGGGTTCTTACTCTTGTGGCGGAATTTGCCCTCTATGCAAAAACCAAAGGTCATCCAGAATTTACGCAAGTGTCTAGCGACATTTTTGATGCTTTTTATGCCAAAGAGATC…	MEVGDLAKDVFLYIWYRNKIIEELPVLCMDPLLEAFVEKLRNAILVETYATMQLWIKFLRKHSNRMISSPTLYAKYVIFACYLLKKHYQNGFECFLRVLTLVAEFALYAKTKGHPEFTQVSSDIFDAFYAKEIKEKFKKQGSWKQFKQYVQKRLSVRQSEEVNKAIDDGMFPYEILSNVLGLSPTKTPKIAGYSIGDINQETVEYHQQTLELVETIASVLENFQKATTEEKAIGMEQETVSSPDVLQGQAPATGKESAEETALLSDPPNMIKQAKRKLIEALADIPALTSLIRYVLLHQPEAKSESHQPEAKSESHQPEAKSESHQPEAKS	NA	NA	NA	6437
TRINITY_DN11433_c0_g1_i1	type:internal	354	CAAGTAACTTCTCCCACTCTACACATCACTCTGGGCGGCGCCTCAGTGCTCGGCACGGGACAGCACGCCACGTACACGAGCAACCCCAACGCGCCAGCGGCCGAATGCACATCTGTTTCGGGCACCCTCAGCAAAAGGCCACCCAATCACTCCCTGAAATCATTCAGTGTGCCCGCACCTCCTTGTCAAAGTGCGCCAACGACCCCACAACCACGGCATATAGTGAAGCCACAGCAAGTTGCCAGCCCGCAGAAGAAACTATTGACTGGCAGTGGGCCATCCCCAGCCACCCCTTCATCTCAGCAATCGACACTCAAGTCGTCTCGGCCTTCCACCATGCCCAAGAGATCGGAA	QVTSPTLHITLGGASVLGTGQHATYTSNPNAPAAECTSVSGTLSKRPPNHSLKSFSVPAPPCQSAPTTPQPRHIVKPQQVASPQKKLLTGSGPSPATPSSQQSTLKSSRPSTMPKRSE	Neogenin_C-terminus|PF06583.10	NA	NA	126
TRINITY_DN11435_c0_g1_i1	type:complete	390	ATGGCAAGCCTCCTTGGAAGTTTCAAGCTCATCTCCAGCGAAAACTTCGGAGAATTTTTGAAAGAAATCGGTGTAAACTTGATGACCCGGAAACTGGCCGAGAGTTCCAAGCCAACGGTCGAAATCAAGCAGGAAGGTGACGAGTACGTCATCAAGACCATTGCTTTCAAGAACTCTGAAATTCGCTTCAAGCTGGGACAAGAGTTCGAAGAGAAGAGGTTGGATGGAAATACCGTCAAGACTGTTGTAACCCTCGAGGGAGGCAAACTGGTCCAGAAGCAATTCGGAGACAAGGAAGTCACCATCACCAGGGAAGTCGACGGAGACACCCTCAAAGTGATTTGCGAATCCGGATCCGTTGTGTCTACAAGGATCTACAAAAGAGAATGA	MASLLGSFKLISSENFGEFLKEIGVNLMTRKLAESSKPTVEIKQEGDEYVIKTIAFKNSEIRFKLGQEFEEKRLDGNTVKTVVTLEGGKLVQKQFGDKEVTITREVDGDTLKVICESGSVVSTRIYKRE*	Myosin_N-terminal_SH3-like_domain|PF02736.17;Lipocalin_/_cytosolic_fatty-acid_binding_protein_family|PF00061.21;Biopterin-dependent_aromatic_amino_acid_hydroxylase|PF00351.19;Lipocalin_/_cytosolic_fatty-acid_binding_protein_family|PF14651.4	ABX75508.1	154.5	24082
TRINITY_DN11438_c0_g1_i3	type:3prime_partial	597	ATGGATACCAGTAAGACACGAAGCATTAAGTCCCTCCTACTCCAAGCATGGAGAGAACGCTGGACAGATGTTGTATGGGGTACTCGAATAAAGAGTGTTTTACCACGAGGTGTAAGTGGAGATGTTTATGATTTAGCAGATTGTATACTACAACAAGCATTGGTTGGACCTGGTCCAAATAGTCTGTTTATGTCTTATTTAATGCATTCCTTAAGCTCTCGAGTAGTATCATATGGTGCTGTTTTGTCTAGCATTGGTCGATATCAGAGTTTCTATAAACCTTATTGTATTCTAAGTTTATTGGAACTTCTAAAAACATTTCAGTCTCGAATTGGTTGCCACGGTAATGAAGAAGAATGCATTGCATTGTGTAAAGCAGTTGTTAGTATTACTCATTGG…	MDTSKTRSIKSLLLQAWRERWTDVVWGTRIKSVLPRGVSGDVYDLADCILQQALVGPGPNSLFMSYLMHSLSSRVVSYGAVLSSIGRYQSFYKPYCILSLLELLKTFQSRIGCHGNEEECIALCKAVVSITHWLYACVYHSITKLSELKQSPEHISIMEKSFEALFYFSNSTFIKSLLYVGKFEDQSMYTQMLQKHKIG	Mediator_complex_subunit_24_N-terminal|PF11277.6	XP_001653641.1	176.4	403
TRINITY_DN11440_c0_g1_i1	type:internal	462	GGAATTCCAGAATTGAAGGTTCCTATCCTTGACCCTTTTCAACCTAAGAAACCCATCAAGGTAGACGTTGAGGACAGTAAAGCTTCGGTTCATGGAAACTTCACCAATGTCCATGTAGAAGGTTTGTCAGGATTTCTGATGGACTTTTTGAACGCTGACCTGCTGAATCTATCTCTTCACTTCAACCTGCGCATCCCTTATATCAAAGCATGGGGGAATTACACCATCGATGGTAAAATTATTAAAATAATTCCAATCAGAGGCAATGGAGGCTTTAGTATAGAATCTCACAACTTGAGTGTATCAGCCAAGGCATCTATAGTTACATCAAATGATGATGATCACCTACAGCTATCCAAGGATTTTGATGTGGAAATGGACTTCGACAAGGTGGAATTA…	GIPELKVPILDPFQPKKPIKVDVEDSKASVHGNFTNVHVEGLSGFLMDFLNADLLNLSLHFNLRIPYIKAWGNYTIDGKIIKIIPIRGNGGFSIESHNLSVSAKASIVTSNDDDHLQLSKDFDVEMDFDKVELYLENFLGGGRWTEVLLKILNE	Haemolymph_juvenile_hormone_binding_protein_(JHBP)|PF06585.9	NA	NA	24
TRINITY_DN11450_c0_g2_i1	type:internal	315	ATAGTGACTCTTGTAAATAAGAAAGTAGAACAGAGGGTTTCTGATAAATCCAGCTCAGCTGTGCTGACAAATAAAGACTTAAATGAATTCAAGAAACTATATACTAATTTCAATAATTGTGATAAAAAATGTAATGGTAAATTACTAAGCTCTGAAGATTGTAATAAAGTATTAAATTCAGATTGCTCTCAAGTTTTAAATAATCAGACTTATTTTCCTACCTTCAGAAAGATTCAAAATGAATTAAAATTAAAGTTCCACTTAAAATCTTGTTTCATATTGCAAACAAATGTATTCTGGTATCCTTATCTAAAC	IVTLVNKKVEQRVSDKSSSAVLTNKDLNEFKKLYTNFNNCDKKCNGKLLSSEDCNKVLNSDCSQVLNNQTYFPTFRKIQNELKLKFHLKSCFILQTNVFWYPYLN	NA	NA	NA	82
TRINITY_DN11453_c0_g1_i1	type:5prime_partial	1014	TCCGATCTAAAAATGGCTGCGAATCGAAAGGCTAGGCATGCCGATCCGGACTGTGAAAGTCCTATTGACTATGTCCAGATTGATGGATTGGTTGTGTTAAAAATAATTAAACATTGCCATGAAGAAGGGGCTGGAGTCACAGATGTTGCCCAAGGTGTATTGTTGGGTCTTGGTGTGGACAATCGTTTGGAAATCACTAATTGTTTTCCATATCCAAGGCATACAGATGAAGAGGATTTTGATGAGATGGAGTATCAAATGGAAATGATGAGGCATCTTCGTCATGTAAATGTGGATCATCTTCATGTTGGCTGGTATCAAAGTACTCACTTTGGCAGTTTTTACAATAAACCGCTGCTTGAGTCTCAATTTAATTATCAAAGCTCCATTGAGGAATCT…	SDLKMAANRKARHADPDCESPIDYVQIDGLVVLKIIKHCHEEGAGVTDVAQGVLLGLGVDNRLEITNCFPYPRHTDEEDFDEMEYQMEMMRHLRHVNVDHLHVGWYQSTHFGSFYNKPLLESQFNYQSSIEESVVLIYDPMRTTRGFLSLRAYRLSNTAMKLYKEGEFTLDMLKNLHVSYSKMFEEITVIIRNSHLVNLLMCEIADWMPPDQESNQFLDMGTASVLEKSLQAMMECVDTVSQETNKLTNHQRQVIKQQQAKNQYLQKRAAENNARSVKGEPPLPDDDINKLFKPIPPPSRLDALLVSGQIDSYCKQISQFSTQNLAKFFMTEALYQK*	Predicted_coiled-coil_protein_(DUF2205)|PF10224.7;Fructose-1-6-bisphosphatase,_N-terminal_domain|PF00316.18;JAB1/Mov34/MPN/PAD-1_ubiquitin_protease|PF01398.19	EFA04093.1	372.5	15986
TRINITY_DN11455_c0_g1_i1	type:internal	585	ACAGAATATACTATAGAAATTCGAGCTTGTCAAGATAACAGACCTAATATGAGAACTGATCCATGCAGCACCAAAGCCATAACGAGTGTCCGAACACTCCATTTAGCTGGTGCTGATGACATCAGGAGCAGCAGTGTTCAGATACAAACAGAAAATGTTACTTCATATTCTGGTTTTGTGAAATGGGAAGAGCCAAAAGAGTCGAATGGTATAATTATAGCTTATACCTTGGAATATAAAAGATTGAATGGAGAAAATCATAAACCCAAAAGAATATGTGTAACTAGAAATAGTTATCTTCCTCGTAATGGTTACTACCTTTCTGAACTCCCCCCTGGAAATTACTCCTTGCGTATTAGAGCAACCTCATTGGCTGGTCATGGAAACTGGACACAACAT…	TEYTIEIRACQDNRPNMRTDPCSTKAITSVRTLHLAGADDIRSSSVQIQTENVTSYSGFVKWEEPKESNGIIIAYTLEYKRLNGENHKPKRICVTRNSYLPRNGYYLSELPPGNYSLRIRATSLAGHGNWTQHVYFHIVAASDNITMETALAVGIVFFIALAIGCVYGVYRWKLSPRIPNYVDYASVNPEYMSSN	Y_Y_Y_domain|PF07495.11;Carboxypeptidase_regulatory-like_domain|PF13620.4;Fibronectin_type_III_domain|PF00041.19;Tissue_factor|PF01108.15	AAG48323.1	102.8	276
TRINITY_DN11456_c1_g1_i1	type:internal	414	ATACAAAGAGAAAACTTGCCTGATCCGATGAGTGTTTTTAGGACATATAGAGAATTTATAGAATTCCATCAGAAACTCAGCATGATGTTTCCCCTTGCAAAATTTCATCCCCTTCCTGGGAATCCTTTAATGGGTAGAACTAATGTCCGTGAAGTCGCTGATAAACGAAAAATGGAGCTCAGCATGTTTTTACATTCATTGATGGCAATGGCTGAAGAAATATCACATTGTGACTTAGTATATTCCTTTTTTCATCCTTTGCTACGAGACCAGGAAGGAATGGAAAGAGAAAACGAAGCCAAAAGTCTTGCCATGCGATCACGCAGAAGTAGTTCTCTCACAGAAATCAATGGGCAAATTAAGATATCTACTGTCTATAAAAAGGACTCTTTGTTCATT…	IQRENLPDPMSVFRTYREFIEFHQKLSMMFPLAKFHPLPGNPLMGRTNVREVADKRKMELSMFLHSLMAMAEEISHCDLVYSFFHPLLRDQEGMERENEAKSLAMRSRRSSSLTEINGQIKISTVYKKDSLFIMVMHA	PX_domain|PF00787.22	XP_001656061.1	114	152
TRINITY_DN11459_c0_g1_i1	type:internal	489	GCTGCTTTGAGTCCAAATCAGAAGGAGGCAAATGATATTAAAAACTCAAATGATGACCATGTACCTTCAAAAGAAATGAATCTGACATCTGATTCCAATCTTTTAGAAAAGTGTAGTCAGACTGAATTTCAAGTGAAAGAGGATACTCAGACTAGTAGAATAAATACTCAATTAAATGTTGAATCTGCACCAAATACTGAATACCAGGTTAGGCAAGAATGTGTAGATGTCAATTCAGAATCTTCAGCTGCTCAGTCTCCAAAAGATGTTGACATAATGGATGTAGAAACTGATGCAGATCCTTCAGAAGCATCTAGACATAATTTCAATGATTTCAACTCTAATATTAATGCAGCATCCCAGGATTCTTATTGCGCTGTTATGAATAATGATGTCAGA…	AALSPNQKEANDIKNSNDDHVPSKEMNLTSDSNLLEKCSQTEFQVKEDTQTSRINTQLNVESAPNTEYQVRQECVDVNSESSAAQSPKDVDIMDVETDADPSEASRHNFNDFNSNINAASQDSYCAVMNNDVRIASTAEDINSESNFDVLSCSSSENEDDEVL	NA	NA	NA	4
TRINITY_DN1145_c0_g1_i1	type:5prime_partial	531	ATAACTGAATTATGTAACAATGCACAGGAATTGAAGCCCACTGCTGAACAGGAAAAAAGCACTGTGCCAAAAGAAAATTTCTATTGGCTTCTTGGAAAACTTATTAGTCATACAGCAATATTTGATCAAGGACAAGAATGCATAACAGGTGTATGTATTGCCAGAAAAAATTTGAGTGGAGTCTGTGCTTATTTTATCCGTTACAAAGGAAAAGGTGTCTACAAAGTCCCTGAAGTACGAATAGCTGAAGATTTCAAAAACCAGAATCTTAAGGTCATAGATCCTTCAGTCAATGATCTTATTGGTTCTCGTCTTAGCCGAGCATTTATTAAAGATGATGGTGATCTGGAATGGTTGGATTGCAAAGTCGTTGGAGTAACTGGTCATGGCTCAGACTTT…	ITELCNNAQELKPTAEQEKSTVPKENFYWLLGKLISHTAIFDQGQECITGVCIARKNLSGVCAYFIRYKGKGVYKVPEVRIAEDFKNQNLKVIDPSVNDLIGSRLSRAFIKDDGDLEWLDCKVVGVTGHGSDFVLEFDFYGANAQVEEDVNIPELETFTFATRLLEEYRTDHLRLL*	NA	NA	NA	597
TRINITY_DN11465_c0_g2_i1	type:internal	462	GAAGAATATAGGGAGTATGATAATAAATTAATGCATGAAAATAGAAATTTTAATGAACCTAGTGACAAAATAATTCAAATGAGTCAAGATTTTTCGAAAGAACATGTAATTTATGACAGATTTTCAAAGCAAAATGAAAGACAAAATTGCCTACTGTCCAATAATAACTTGATTAACCAAAATCTCTCTTATCCATCACCCAAGAGTGGTTCTGAATTACAGCAGGAATCATTATTTACTAATGATTGTAATCATACTAATACTTCTGACAGTTCACTTTCCTCACTTTCTAATAAATTTAATTTTCAATCTAGTAGAATTAAAAGTTTAAACAGTTCAAAAAATATTGAATTGAATGTTTTCTCAAAAGAGTTTAAAAATTTTAATGCATCCATGTGT…	EEYREYDNKLMHENRNFNEPSDKIIQMSQDFSKEHVIYDRFSKQNERQNCLLSNNNLINQNLSYPSPKSGSELQQESLFTNDCNHTNTSDSSLSSLSNKFNFQSSRIKSLNSSKNIELNVFSKEFKNFNASMCEINHSSNEHSSDTDINKKSSR	NA	NA	NA	86
TRINITY_DN11466_c0_g2_i1	type:internal	555	TCCGATCTCGTATTTCCAAAGTGTGAAAGTCGCAAAACAGGTGAATCCACGATACATATTAATGGTGCATGGCAGCTTTTACCCGGAGGTGTAGTTGGAATAGAAAAAGGAAGAATACTAAGCATTACATGTGAAGCTAATGGTACCGGAATTGTCCCACAATGGAGCTATTCAGTTGCTTCACGAATTTATGTAGACACTTATCGAGATCATTATTCTGGGAGAAATGTTAGTATGCTGTATATCGTGGAAGTGGACACGATACACGCTGGCAAATATCTATGTTTTGTGCCTGGTTATGCACCGAATATCATTGAAATACAATTAGTGACAGATACAGATTTTGCGCCTGTAAAATGCCCGAAAGTAGAAGATGGTCAACTTTTCATCCAGTACACT…	SDLVFPKCESRKTGESTIHINGAWQLLPGGVVGIEKGRILSITCEANGTGIVPQWSYSVASRIYVDTYRDHYSGRNVSMLYIVEVDTIHAGKYLCFVPGYAPNIIEIQLVTDTDFAPVKCPKVEDGQLFIQYTNEQNVGSVATISCKYRHKTLYGGARRWVCLLDGQWSSSILPRCKAQCPNITG	Immunoglobulin_domain|PF13927.4;Immunoglobulin_domain|PF00047.23;Sushi_repeat_(SCR_repeat)|PF00084.18	NA	NA	177
TRINITY_DN114_c0_g1_i1	type:3prime_partial	471	ATGCCTTGTATCATATGTACTGACCGGTTTGATTCGATCCTTGATATTGCTAAAACCAAATGTGGTCATGTCTTTCATTTTGATTGTATTTCTAAGTGGGTTGAACAGTCTAAAACCTGCCCTCAATGCCGATGTGTAGTTCTCAATACCGATGTATTGGATCTACGCATAAATTTTACTCCTAACGATGATATGCCACGTTTGAGATTTATGGTGTACGAAATCAAAGCACTAATGGAAGAAAAAGAAATGGCGTTATTATCTTCAAAAGAACAAATAAAAGAAAAACAGTTAGAGATGATTATAAGAAATGTGCATAATTCTAAAGTGCAGGAACATCTAAGAGGATTAGAATTTAAATATGCATTAATCAGGGCTAAAATAGGTTTGAGATCGTTA…	MPCIICTDRFDSILDIAKTKCGHVFHFDCISKWVEQSKTCPQCRCVVLNTDVLDLRINFTPNDDMPRLRFMVYEIKALMEEKEMALLSSKEQIKEKQLEMIIRNVHNSKVQEHLRGLEFKYALIRAKIGLRSLPSLVTEVQRLKQENKRLTGESNPI	zinc_finger_of_C3HC4-type,_RING|PF15227.4;Zinc-ribbon,_C4HC2_type|PF17120.3;RING-like_domain|PF08746.9;RING/Ubox_like_zinc-binding_domain|PF14570.4;RING-variant_domain|PF12906.5;FANCL_C-terminal_domain|PF11793.6;MGS-like_domain|PF02142.20;Zinc-finger_of_the_MIZ_type_in_Nse_subunit|PF11789.6;zinc-RING_finger_domain|PF14634.4;Zinc_finger,_C3HC4_type_(RING_finger)|PF13923.4;Zinc-finger|PF17122.3;RIN…	XP_001664167.1	75.1	414
TRINITY_DN11509_c0_g1_i1	type:internal	486	AAAATATTTGTACCTGTGCAACAAGAAATATTCTTAAATTATCCTCAGAATACTGATTTTATTGAATGTAACTACACTCAAGCCAGATATTTCCATGAGAGGTATGGAAGAGATGAAAGTGATGAAGCCGAAATATTTCGTTCAAAAGCATTCAAGTTATTGTCTAAAGCTAAGACACTCTTAGATAATTTAAAAGTTCCTTTCTGGTTGAGTAGTGGAACCTGCTTAGGTTTCTTTAGAGAATGTGGTTTTATTTCACACAGTAAAGATGTTGACATTGGAATTTGGATCAAAGATTACAAACCAGAAATCATATCAGCATTTTCAACTCATGATTTGCCTTTAACTCATTCATTTGGTAAGGTTGAAGATAGCTTTGAATTATCATTTAGAGATAAT…	KIFVPVQQEIFLNYPQNTDFIECNYTQARYFHERYGRDESDEAEIFRSKAFKLLSKAKTLLDNLKVPFWLSSGTCLGFFRECGFISHSKDVDIGIWIKDYKPEIISAFSTHDLPLTHSFGKVEDSFELSFRDNDLKLDIFFFYEEETYVWNGGTQARTGKKF	LicD_family|PF04991.11	NP_001244424.1	182.6	234
TRINITY_DN11515_c0_g1_i1	type:internal	624	CAAACTGTTGCAGTTGCTACTCAAACTAATGTTTCCAGTGCTGCAACAATCAATTCAAATTCAACTCCTGTACGCTCTCAAATCAAACCAAAAGTACGAACTCCAACAGGACCTTCTCCAGGTGCAAGTCCTTCCCCATCAACTCCTCAGATGGCAACCACACAAACTCAAACCAACCAATCACCTCCACAGCCGCCACCTCAATCTGTAATGCAACAAAAGTCTGATGCAAGCAACCAAACATATCCAAATCCAGTTAAAGTTATGAACATTGAAACAAAATCTACTGGGATACAAAGCAAATCTGTATCTGTTGAAACTAAACACATGTCTACTTCTCCCCAGAAATCTCAAGCTATGGTAGCTCCATCCTCTAAAATTCCACAAGCATCTGTTACA…	QTVAVATQTNVSSAATINSNSTPVRSQIKPKVRTPTGPSPGASPSPSTPQMATTQTQTNQSPPQPPPQSVMQQKSDASNQTYPNPVKVMNIETKSTGIQSKSVSVETKHMSTSPQKSQAMVAPSSKIPQASVTPTIDVSVSMAPSTLTTVSSTTSVLTTTTPVQVNTSVSSVESITPTVPSVSTVPPVACLTNKVVPESNLKLTDRKS	NA	NA	NA	492
TRINITY_DN11524_c0_g1_i1	type:internal	477	AGAATCAAGCTTGATATTTCTGCAGGATCTCCTGTGATTGCTATTCCTCAGAGTGCTTCATTGACTGATGTTCTAGTTGCAGATCTAGGACAAATAACTGTTTGCAATACTTTTCTTTTTTATGGAAATGAAGGTACTATCAGTTATTGTGAAAAGGAAGATGATTCTAAATCTCCACCTGAAAAGAAACTTAAAAGAACTAAAAGTAAAGATTTTTCAGAGAGATCAAAAGTCCTGTTTAATCAAACTGAATGTTTATTGGATGTGATTAATGTAGAGTTAACGGACATGGATTTGTACTCTGCTATTCATCTACCTAAAGAAAAAAGTCACAAAAGAAAAAATATTACCTCACCATCTGATTCCAAGGACCTTATTTTCCCATCATTTATCATCAGA…	RIKLDISAGSPVIAIPQSASLTDVLVADLGQITVCNTFLFYGNEGTISYCEKEDDSKSPPEKKLKRTKSKDFSERSKVLFNQTECLLDVINVELTDMDLYSAIHLPKEKSHKRKNITSPSDSKDLIFPSFIIRKQGNDLLQQKFMLQVQVERNLDSATS	Repeating_coiled_region_of_VPS13|PF16910.3	XP_001658433.1	32.3	216
TRINITY_DN11528_c0_g1_i1	type:5prime_partial	303	AACGAAATTTACGACGAGTGCGTATCTTTACATTTCGCTATCAGTGAAGAACTGCAACAAAAAATGCGAGAAATTGTTTCTCCTCCACGACCTTATTTCGAAATTAGTATACCATCATATGAAAACATTAAACATCCTATAATAGTCGATTTAACTTGTCAAGTGATACCATCTAGAAAAATCTCGCTCTTTAATGAACTAAGTTTGTTTACATTGTATGAAAAACAACCAGATTCTCTATTCAAGCTTCAGAGATGGATTCGATTTCGGCTTCAGAAAAGGATGATTCGATTTCAGCTTTAG	NEIYDECVSLHFAISEELQQKMREIVSPPRPYFEISIPSYENIKHPIIVDLTCQVIPSRKISLFNELSLFTLYEKQPDSLFKLQRWIRFRLQKRMIRFQL*	NA	NA	NA	158
TRINITY_DN11533_c0_g1_i1	type:internal	453	TCAACAGTGCCGACTTTTTATGGAATTGATCTTGAAGATGGAACAGAAACGATCAAAACAATGCGAGGACGATATGCTACAGAAGTTTTCACAGAAAGAGCCCTGGATATAATTTCTTCCCATAATGAATCTGATCCTCTGTTTTTATATATGGCACATTTGGCGCCACATACTGGAAATGAATACATGCCTTTACAAGCTCCTATGACTTATACATCAAGAAATTCTCATATCCAAGACTCCAAGAGAAGAATGTACGCTGGAATGGTTTCCGCTTTGGATGAATCTGTGGGAAAATTAGTGGATGCTTTTAGTCAGAGGGGTTTCTTAGAAAACAGCATCATTATATTTGCTTCTGACAACGGAGGAGACGCGGGAAGCTATCAGAAAGGAGCAGCT…	STVPTFYGIDLEDGTETIKTMRGRYATEVFTERALDIISSHNESDPLFLYMAHLAPHTGNEYMPLQAPMTYTSRNSHIQDSKRRMYAGMVSALDESVGKLVDAFSQRGFLENSIIIFASDNGGDAGSYQKGAASNWPLRGQKASSWEGAIR	Sulfatase|PF00884.21;Type_I_phosphodiesterase_/_nucleotide_pyrophosphatase|PF01663.20;Protein_of_unknown_function_(DUF229)|PF02995.15	NP_610807.3	140.2	195
TRINITY_DN11551_c0_g1_i1	type:internal	465	CTCTTCCGATCTCAACTGCTACTTTTGCAAAATTCCCTTTTGAAATTGGAGAGATATAGAGAATGTGTATATTGGAGTGAGGTGTCATTTAATGAAGCTTTGCAGCAGTTTATGAATGCTGCAAGATCTGATTGGTCTGAAACAATGGCACATCTGTTGCTTGGACTAGACAAATGTATTAATTTAGATTCGAAGTATTTGCGTCAGCTTGAAGAACCCAGACTTGTGCGACTTACTCAAAACTTAATTCTTGTCATTGTCATTCAAATGGAGAACTATGACTTTTCATCTGATAATGCTTCATTATTAGTTGTGTTACCTTGGAAAATATTGTTTCATCTCATACTGAATGAAGAAAAGAGAACTCCAAAAAAAGCAGCAAAAGTGGATTTGTTAAGT…	LFRSQLLLLQNSLLKLERYRECVYWSEVSFNEALQQFMNAARSDWSETMAHLLLGLDKCINLDSKYLRQLEEPRLVRLTQNLILVIVIQMENYDFSSDNASLLVVLPWKILFHLILNEEKRTPKKAAKVDLLSSAMPSSLMLLFSAHEYLGRRSW	NA	AAI28636.1	39.7	199
TRINITY_DN11558_c0_g1_i1	type:complete	342	ATGGCTCTTCGTGCGTTTGTACAAAAATATATCGCCACGAATGGCGTTAAAAGATGGTTTTTCAACCGTGTAGGCTACAACAAATATGGTTTGTTTCGTGATGATCTATTTTATGAAACTCCAGAAGTAAAAGAGGCAATTCGTCGACTACCTCAAGATGTCTATGATGCTCGCATATTTCGTATTCAAAGAGCATTTCAACTATCTCTTTCTCAGTCTATCTTACCCGAACACGAATGGACTAAATTCGAAGACGATTTGAAAAATCATTACTTGGAATCGTTGGTTGAAGAAGTGAAGAAAGAGGTTAGAGAACGAGAGAATTGGGCGAAAACTCATTGA	MALRAFVQKYIATNGVKRWFFNRVGYNKYGLFRDDLFYETPEVKEAIRRLPQDVYDARIFRIQRAFQLSLSQSILPEHEWTKFEDDLKNHYLESLVEEVKKEVRERENWAKTH*	Ubiquinol-cytochrome_C_reductase_complex_14kD_subunit|PF02271.14;N1221-like_protein|PF07923.11	XP_001090937.1	118.6	18818
TRINITY_DN1155_c0_g1_i2	type:internal	681	TTACATTCAAATTTAACTGACCAGTGCCTTACAACCACTTCTAGTCCATCTATGATGTCCAACAGTCAAAGTCAATCACATCCAGTAGATGTTGTCTGTGATAAGTTACCTCATATCAATCTTAATAATTTAGATTCTTTCTTAGGTAGTGAAACTGCCTTGTCTGATATTCAACTTCTTCCACAAAATTTCCCAAATGTTGGTATTCCAAATGGTGTTAACTACAGTCAGTCAAATCGATCATGTTTAACTAATTGTGGACCTGATACTCATCAGCTGTCTTGTGAAACTGGGAATTTTTATAATCCAAATGTCAGTTCCTTACCATCAACTCAGGATATTTCTGTTCAAACATCTGAAAATCCCTTGATTGATAATCTTTTAGAAAACCATTGTTTA…	LHSNLTDQCLTTTSSPSMMSNSQSQSHPVDVVCDKLPHINLNNLDSFLGSETALSDIQLLPQNFPNVGIPNGVNYSQSNRSCLTNCGPDTHQLSCETGNFYNPNVSSLPSTQDISVQTSENPLIDNLLENHCLSCSQVNPSAAIDVIQCYKCRFCDFVNLHKCAIESHINTVHSNPHKELPLVRNDVSPSSQRSVVSNSPITTEGTNQMNFSKSNSTTVTMPFNSAV	Protein_of_unknown_function_(DUF1314)|PF07013.9;C2H2-type_zinc-finger_domain|PF13909.4	NA	NA	245
TRINITY_DN11561_c0_g1_i1	type:internal	459	ATAGATTTGAAGCAAAGATTTGATGTGAATTCAGAAGATGTAATAATTTTATGTTCTCCTATAACATTTGATCCTAGTATAATTGATATATTTCTTGCTGTTTCTTCTGGTTGTACTTTGGTTATTGTTCCTGATCAAATAAAACGTATCCCAAAACAATTTATTGAAGTTATTGTTAATAGCAAAGCTACTATTCTTCAGGCTACTCCATCATTAATTCAAAGTTTGGGAAATGATTTTATAAAAGATGTTCTCCTATCTAAAGATTCTAATTTACGTGTTCTAGCATTTGGTGGTGAACCCTGTCCTTCCTTAGAAATATTAAAAAGATGGAAATCTAAGGAAAATAATACAAAACTTTTTAATCTTTATGGATTGACTGAAGTTTCATGTTGGGCT…	IDLKQRFDVNSEDVIILCSPITFDPSIIDIFLAVSSGCTLVIVPDQIKRIPKQFIEVIVNSKATILQATPSLIQSLGNDFIKDVLLSKDSNLRVLAFGGEPCPSLEILKRWKSKENNTKLFNLYGLTEVSCWASCFEINLEDKRTLHWWRKKV	AMP-binding_enzyme|PF00501.26	Q5RG49.1	154.8	80
TRINITY_DN11566_c0_g1_i1	type:5prime_partial	420	TATGATATGCAGTTATATGTTAAAAAACAAAAGCAAGAACTTCAAAGAAAAGAAGAGGAACTTTATCGTCAGAACCTTATGACTAAATTATATGAAGAAGATAAATTGGAACTTATGTCTAAACAAAAGCAACACCAAAAGAAAGTGGAACACATGCGAATAGCCCAGGCAATGATGGAAGAAAGTCGGAGAAAGAAAGCTGCTGAAAAGGCTAGAGAAATAGCAGATAAAAAATATCAAGAAGAATTGGAATCGGAACGTATAAAAATGGTTAAAGAGGAAAAAATGAGGTTTCTCAAAAATCATGCTAATGAACTTTTAGGATATTTGCCTAAAGGGATGTTTGAAAGTAATCGGGCTATTGAAGAATTGGGAGATGATTTCAAAAAATTTTATTTT…	YDMQLYVKKQKQELQRKEEELYRQNLMTKLYEEDKLELMSKQKQHQKKVEHMRIAQAMMEESRRKKAAEKAREIADKKYQEELESERIKMVKEEKMRFLKNHANELLGYLPKGMFESNRAIEELGDDFKKFYFRKGCNK*	O-antigen_ligase_like_membrane_protein|PF13425.4;LicD_family|PF04991.11;linker_between_RRM2_and_RRM3_domains_in_RBM39_protein|PF15519.4;Chemotaxis-inhibiting_protein_CHIPS|PF11434.6;Trichohyalin-plectin-homology_domain|PF13868.4;Sir4_SID_domain|PF16991.3	NP_955465.1	106.3	223
TRINITY_DN11576_c0_g1_i1	type:complete	303	ATGATGCTTATCTTTCATTTGTGTGGAACACTTCTAATAGCCATTTCCCTGACGGCAGCATCTGATGATGATCGGGATGCACTATGCAGCGAAATGGAATGCGAAGACTACGATTGCATGGAAGTGGACGACTGTGAATTCGGGGAAGTCCCGGATGTCTGTGAATGTTGTTACACATGCGCCAAAGGTCCCGGTGAAAGTTGCGGTGGAATGTTCGATTTAGCGGGCACATGTGCCTGGGGATATGCTTGTCAACCTCATCCAAAGTATCCTCAGCTTCCTGGTATTTGTGTCAAGTACTGA	MMLIFHLCGTLLIAISLTAASDDDRDALCSEMECEDYDCMEVDDCEFGEVPDVCECCYTCAKGPGESCGGMFDLAGTCAWGYACQPHPKYPQLPGICVKY*	Insulin-like_growth_factor_binding_protein|PF00219.16;NADH-ubiquinone_oxidoreductase_ASHI_subunit_(CI-ASHI_or_NDUFB8)|PF05821.9;Neuroparsin|PF07327.9;Copper_binding_proteins,_plastocyanin/azurin_family|PF00127.18	XP_001371652.1	59.7	372
TRINITY_DN11580_c0_g1_i1	type:internal	627	TTTTTGATTTTTCACAGTTTTGGAGGTGGCACTGGATCTGGATTCACATCTTTGTTGATGGAGAGGTTATCTGTTGATTATGGCAAGAAATCAAAATTGGAATTTGCTATCTATCCTGCACCTCAAGTATCAACAGCTGTCGTTGAACCATACAACTCCATTCTTACCACCCACACAACTTTGGAACATTCTGATTGTGCTTTCATGGTTGACAATGAAGCCATTTACGACATTTGCCGAAGGAATCTCGATATTGAACGTCCTACTTACACGAATTTGAACAGATTGATTGGCCAGATTGTATCATCAATCACTGCTTCTCTGAGGTTTGATGGAGCCTTGAATGTAGATCTTACTGAGTTCCAAACCAATCTTGTGCCATATCCCCGAATCCATTTT…	FLIFHSFGGGTGSGFTSLLMERLSVDYGKKSKLEFAIYPAPQVSTAVVEPYNSILTTHTTLEHSDCAFMVDNEAIYDICRRNLDIERPTYTNLNRLIGQIVSSITASLRFDGALNVDLTEFQTNLVPYPRIHFPLVTYAPVISAEKAYHEQLTVSEITNSCFEPANQMVKCDPRHGKYMACCLLYRGDVVPKDVNAAIAAIKTKRTIQF	Tubulin_C-terminal_domain|PF03953.15;Tubulin/FtsZ_family,_GTPase_domain|PF00091.23	AAM73990.1	421.8	9377
TRINITY_DN11586_c0_g1_i1	type:internal	564	TTTTTTACTACAGCCCATGCCCATTTTCGTGCTGGTTGTCCTGCACTTGCCTTAGAAGTGTTATCTCGTTTGCCAAATAGGGTTTTAACAGATGGTCCTATGTCTCCTGATGATGCAGTGTTTGATTTTGCAAATGTTTTGAATGAAGGGGATGATGTTATTGCTACTGGAACATTTACAAATGAAGATGTAGTTACTAGTACATCCAAGAATAAAAGTATGGATTGGAGTCAACCTGTTGTATCTGCTGGTGGAGGTTCAGCAGCTGATTTTGATTGGAGCCAACCAGTTCAACCTGCCAAAACAGAATCATCTTTAGACCTTGATTGGGGAGCTCCTGTTTCACAGCCAAAAGAAATTGAATTAGAATTGGATTTTGGTCTGGATAACAGTGAAAAT…	FFTTAHAHFRAGCPALALEVLSRLPNRVLTDGPMSPDDAVFDFANVLNEGDDVIATGTFTNEDVVTSTSKNKSMDWSQPVVSAGGGSAADFDWSQPVQPAKTESSLDLDWGAPVSQPKEIELELDFGLDNSENEDSEDGIEIKVSEEPVKEEIKNGPKQPVTIDIMAQQLKFIACLKIMMEELSTLAT	NA	XP_001657831.1	89.4	160
TRINITY_DN1158_c0_g1_i1	type:internal	816	CTTGTCCATTCTCATCAACTGGATCATGGCATGCATTGTACAGTTGATTCAACTGTTGGACCTAAACTGCACCATGGAGAAGAGAACATAGTGGATAGTTCTGATGGTTACAATGAGCATCTAGAAAGTTCGGACAATGTTTTGCATACAACTACTGGAGGTGATTATCACGTCCCTATTTCAGATGTGAATTCTTGTGATAACACTACTAATGAAGTTGTAACATCAGTGTTGAATAACAATTCTAATCTTGGTGCAAATGAAGCTCTCAGTGCTTCAAACCATGGTTTTTCTCAAAGCCAATTGGATGAACTCCATAGTTGTGCCACAGTTAGTAGTGCAACACATCCCGATTCCACTCGAAGTCCTTTGGGAATGTCAGAACATTCACCAAGCTAC…	LVHSHQLDHGMHCTVDSTVGPKLHHGEENIVDSSDGYNEHLESSDNVLHTTTGGDYHVPISDVNSCDNTTNEVVTSVLNNNSNLGANEALSASNHGFSQSQLDELHSCATVSSATHPDSTRSPLGMSEHSPSYSITQASLANSDIAQSEYSRPRRDPRNRHWCEDCGVFFEKECPQHKIQLIYDKPVLSRAWASLPAQYLYVNKIAMDNEGELVYGVFAKKTIPKRTQFGPIEGVLIKREDPPSDNFILVLEHEENVAFYVDTSDESVSNWM	Nudix_N-terminal|PF14803.4;Domain_of_unknown_function_(DUF1966)|PF09260.9	NA	NA	228
TRINITY_DN11592_c0_g1_i1	type:internal	525	ACGATCTTCTATACTCTGAATCACAATGAAAAATTTTGTGATAGTGATTGTGTAAAAGTGTTTTTTAATTTTGATATCAATGTAAAAAAACACGACTCTTTGAAATATTCTCTTAGTGAAGAAGAAAAGGATTTATTGATTTTTACGTGCGAGTTAATGCATTTAGGACCAGTGCATTATTCAATATTGTTTAAGCAATTCCAATTGCGAAACAGAAATTCCCAGAAATCTTCGACATATTTAAAGCAACTTAAATGTGTCCTGAAAAGATCGAATTATTTCATTTTCAGTGGTGAGGAATTTGTTAGCTTGTGTGATATTCCATGTATAAAAGGGGTGAACTTAAATAATTTTGTCTTTAAAGGGAAGAATACGGCAGTTTTGAATTTTGAATACCAT…	TIFYTLNHNEKFCDSDCVKVFFNFDINVKKHDSLKYSLSEEEKDLLIFTCELMHLGPVHYSILFKQFQLRNRNSQKSSTYLKQLKCVLKRSNYFIFSGEEFVSLCDIPCIKGVNLNNFVFKGKNTAVLNFEYHEEKIDAYYEDMIDSCIQSLSKKKYQEHSKTNTKETSVNLLKI	NA	NA	NA	102
TRINITY_DN11595_c0_g1_i1	type:internal	852	GATCTTGATGATCTGAACAGAATTATATCTTTTGATGATATTTCTCACTTTATTTTTCGCATTCAAAATGAAGAACACAAATTTTTGTTGGTGCATAATTTTCTTAAATTTTTAGGTTTCAATCCACACTTGTTTGGATGTAACAGCTGCTCTGAAAAGAAAATATACAGTCATATAGATATCGATAATTTTGATGTTATATCAAAGAAGTTAAGCAGTTCTTTATTTAGTAATAAAAACTCTAATCCTTTGTGTTTTAAAAACAGAATTTGGAACACAGAAAATGTAAATTTTATAAAAAATGTCTTTTCACAAGCAAGAGGAAAATTCTCTTCTGAATACAGAGTTTTGCTGTCTCTTATGTATTTGAAATATCTTCAGAAAGTTGCTTTAGAATGT…	DLDDLNRIISFDDISHFIFRIQNEEHKFLLVHNFLKFLGFNPHLFGCNSCSEKKIYSHIDIDNFDVISKKLSSSLFSNKNSNPLCFKNRIWNTENVNFIKNVFSQARGKFSSEYRVLLSLMYLKYLQKVALECDIESESIENAKKCAKSMLQESENRNCLLLWYEYIIIESCSSSNRKAKKIAETLFSSSSSAVISGTMPLKELWYFARSCIDFSLNLQENCAPDNELFSKNEIIWLLIHIGSKEKYLPYSNELIKPTQILKTASGFKYFLNEELSLIVNIKCN	NRDE-2,_necessary_for_RNA_interference|PF08424.8	NA	NA	321
TRINITY_DN11596_c0_g1_i1	type:complete	1098	ATGTTCGTTTCGCGCAGCATTCAAGCTGATCATAAGGATCTGATTCATGATGTTGCCTATGACTTTTACGGCGAAAGATTAGCTACCTGTTCAAGTGATCAGACTGTTAAGATTTGGGATTTAGGAGAAGATAAACAGTGGCATTGTACAGCATCTTGGAAAACTCATTGTGGGTCAGTATGGAAAGTAACATGGGCTCATCCAGAATTTGGTCAAGTCATTGCTACTTGTTCTTTTGACAGAACTGTTGCTGTATGGGAAGAATTGGGACCTGAAGGATCCATTGGAGAGAAATCTCAGTCTCAGTGGGTAAAGAAAATTAGTCTTGTGGATAGTAGGACTCTAGTCACAGATGTAAAATTTGCTCCCAAACATCTTGGTCTTCAGTTGGCAACTTGC…	MFVSRSIQADHKDLIHDVAYDFYGERLATCSSDQTVKIWDLGEDKQWHCTASWKTHCGSVWKVTWAHPEFGQVIATCSFDRTVAVWEELGPEGSIGEKSQSQWVKKISLVDSRTLVTDVKFAPKHLGLQLATCSADGVVRIYEAPDVMNLSQWSLHHEIPCKHPCSCISWNLSRTHPPMIAVGSDEASPGDKVILCEYNENLRRWPRIETLPVKEPVYDIAFAPNLGRSYNLLAVATKNLQIFILRPLHDPNAVGAQEASPKYEIRQAGQFDNHNSQVWRVSWNITGTILASSGDDGCVRLWKASCNEKWKCIATLKGDGSTEPAEKQSNNESEAANKMDTTNNIPTTRYYKLGQVSHLKQEAWH*	WD40_region_of_Ge1,_enhancer_of_mRNA-decapping_protein|PF16529.3;WD_domain,_G-beta_repeat|PF00400.30;Anaphase-promoting_complex_subunit_4_WD40_domain|PF12894.5	NP_001085936.1	375.2	5130
TRINITY_DN1160_c0_g2_i1	type:3prime_partial	300	ATGCATCAGCACAGAAGACGTAAAAAAAGGCCTAGTTATGGTGTAAGAACAGTAGAGATCTCAAGAGGTAAAAATGGCTTTGGGTTTACTATATCAGGTCAAGCTCCATGTATTCTGAGTTGTATAATAACAGGTAGTCCTGCTGAAAAAGCAGGCTTACGTCCTGGAGATTTTTTGATAGCTGTAAATGGCCAGAATGTATCAAAAGCACCTCATGATGATGTTGTTAGATTGATAGGAAATTCAAGTGGTGTATTAAAGCTTCAAATAGCCGAGAACTATTATTCAGATTCTTCTGAA	MHQHRRRKKRPSYGVRTVEISRGKNGFGFTISGQAPCILSCIITGSPAEKAGLRPGDFLIAVNGQNVSKAPHDDVVRLIGNSSGVLKLQIAENYYSDSSE	NA	XP_001658328.1	161	24
TRINITY_DN11620_c0_g1_i1	type:internal	468	TCTTCCGATCTCAAGAAGGGAGGGTCCACCTGGCAAAAGGCCCCTCCGGCCACTACTTCAGTAGTGTTCGATTTCCGAGGCAAAGATGTAAAACCGAACATTTCTCTGAACCCTGCTCCTTTCGGCTGCAGGCCGGCCAAAGTATCCCGGAGCTCGAAGCGATCCGGTTCTCCTCCTCGATCCGGGATTAACGGGATCGAACCTAAGAACTATATTGTGGATGAGGAACTCAGAAATGGTGATGATGACGAAGACTGGGATGAAATGGACATTGGAGCTGACCTTCCTGTTGTGTCGGGAATTGTATTTTCCGGAGAAAATGTCAAAGTTGGGAGAGGAGCTCTTTTAGAGAAAAGGAACAAAAAGCTAAGTATTCAATTTGATGATAGAGCCACATCT…	SSDLKKGGSTWQKAPPATTSVVFDFRGKDVKPNISLNPAPFGCRPAKVSRSSKRSGSPPRSGINGIEPKNYIVDEELRNGDDDEDWDEMDIGADLPVVSGIVFSGENVKVGRGALLEKRNKKLSIQFDDRATSTFEYPSENASPSPREETESWADS	Phostensin_PP1-binding_and_SH3-binding_region|PF13914.4	NA	NA	258
TRINITY_DN11621_c0_g1_i1	type:complete	813	ATGCCAACTCATCAACTTAGTTATTTAAAACATCTTTTCATTTTTATATTAGTTTTATGTCTAAGCTGTGAATTAGTAACATGTTTAGGTGAATTAATATATGCAATTAATGCTGGTGGAGAATCTCATGTAGATTCTGATGGTATACATTATCGAAGAGATCCATTGCATGGGAGGATTGGAACAGCATCGGACTATGGAAAACAATTAATAATTAGTAGAGTACCTAGAACTGATCAAATACTTTACCAAACAGAACGATACCACCATGCTACATTTGGTTATGAGATTCCTGTGAATAAAGATGGAGATTATGTTCTAGTATTAAAATTTTGTGAAGTTTACTTTTCTTCTCCTGGAATGAAGGTCTTTGATGTTACTTTAAATGGTGTTCATACC…	MPTHQLSYLKHLFIFILVLCLSCELVTCLGELIYAINAGGESHVDSDGIHYRRDPLHGRIGTASDYGKQLIISRVPRTDQILYQTERYHHATFGYEIPVNKDGDYVLVLKFCEVYFSSPGMKVFDVTLNGVHTIVSDLDIFAKVGKGVAHDEHIPFTVKGNKLIVNEEESEHDGKIRVEFIKGYRDNPKVNAIYVARGSTTDVPQLPSLASDEKDEEEEEATQEKKASPIRYPSGPRIPNPYETEDSSTMLPIFIAIGAFLPLLFCLCRL*	Di-glucose_binding_within_endoplasmic_reticulum|PF11721.6	XP_001650209.1	237.7	918
TRINITY_DN11622_c0_g2_i1	type:internal	528	ACAGATGATATGTTTGAAGTTGATAAAGTTCAGTATTCCCTAGACTTCAGGATTATTGAAGGTGATGTTGGATTGCCTCAAAATTCATTCAGGACATCTGACTTTCTGCCTCATGGTTGTTTTTGTGTTTATTCAAATCATCAAACTTTGGAGTATATTAGGGATAGTTTGGAGAAAACCTTGCTGTCAAATTTAGAACAAGAAGATAGATTACCTTTCCATGGTCTTCCTATTGTAATTTTATTTGCTGCAGATAACAGTATAAATGAAAAAGATCTGATTTTTTTAAGAGAAGAAGGCCAAAATCGTGCTAAAAGCTTACAATGTCCATTCTTGGATGTGAGTTGTCCAGATGATTCAGCAGATCAGCGTTTTGATGTTGCTAGTCTCGTTACTGCA…	TDDMFEVDKVQYSLDFRIIEGDVGLPQNSFRTSDFLPHGCFCVYSNHQTLEYIRDSLEKTLLSNLEQEDRLPFHGLPIVILFAADNSINEKDLIFLREEGQNRAKSLQCPFLDVSCPDDSADQRFDVASLVTALQSLIESIQRRAGLLQIYHTLPEQAINPDIRIIMCMLCGDPYS	NA	AAM51993.1	78.6	192
TRINITY_DN11624_c0_g1_i1	type:internal	405	TCTTCAGAAAAGAAAACTACAGCTGCTGCAGTTAAACCTGAAAAGGATAAGCATGCCAATTCTTGGTGTGGATATCCTGCTAGTATTGATTCTTATCAAGGATCTGTACATACTAGGATAGATATCTATCCTCCAGGTGTGATGAAAGGCCATATGCCTGGGGCTTACAATGGTGGAACTCGATCAGAACCAGATATAAATCGTGATTATCCTTTTCAGACAGGAAGACACTCTGTTGGCTCAGTATCTGCATCTAGTGTTGTATCTATTGAAGCATCAACAGGAGATGAGAAACCTTTGGTTCCTCAAAGAAGACCATCTGTCATTCAACATACAGAGTATGCTGCTACATCACCTTCTCCTTCATTGTCTCCCAAGCAGGTTGGTTCAGAATGCAGA…	SSEKKTTAAAVKPEKDKHANSWCGYPASIDSYQGSVHTRIDIYPPGVMKGHMPGAYNGGTRSEPDINRDYPFQTGRHSVGSVSASSVVSIEASTGDEKPLVPQRRPSVIQHTEYAATSPSPSLSPKQVGSECRNV	NA	NA	NA	31
TRINITY_DN11635_c0_g1_i1	type:internal	648	CTCGCATCCCAGGACCGGTCCATCAACGTCCCTCCCCCTCCTTATCTGCGAGCTGAGATGCACCAGCATCAACATCAACATACACACATGCATCAACACAGTCCTTTTCTTCCCCCTCCCCTAGGAGGATCTCTTCTGCCTCCATCAGCAGCTCATTTGTATGACAAATTTCCAAAAGTTGATTCAAGTTTTTACGGACGCAATGCATTGGGATTACCGACATATCCAATATCTCCACTTTTGGCTCCAGGTTCGGCTACAGCGACGCCAACTCCTTTTGCTCCTCCAGGACACATGGCAGCCTTTCAACCAAAGATATCTCCTCTGGTGAAAGCCAAAACTATGAAATCTGGCCGTTGGTGCGCGATGCACGTCAGAATTTCTTGGGAAATCTACCAC…	LASQDRSINVPPPPYLRAEMHQHQHQHTHMHQHSPFLPPPLGGSLLPPSAAHLYDKFPKVDSSFYGRNALGLPTYPISPLLAPGSATATPTPFAPPGHMAAFQPKISPLVKAKTMKSGRWCAMHVRISWEIYHHQQQKQQAENQKSGGGPTKTVTDLLRPPNHLFGSIPRPHELGFSSPLLGAAASLHARSPYDVSPQHPSFLGPTPAHLGITPYA	Autism_susceptibility_gene_2_protein|PF15336.4	AAO85466.1	74.7	330
TRINITY_DN11650_c0_g1_i1	type:internal	429	ACTGAAGAAAATCAAAATTCATCGTTTACTCAAACAGAATGTGTTTCATTTTCTTCAATAAACCAAATGACAGCACAAATACCCTCTGAACAGCTTTCCACACCCGTTGATTCTCATGCAGGAATTGAAATTTTGGATGAAGCCGATGAAGAAATTGCAGAAGAAGAACAAGATGTGACAACCTCTGCGGCATCTACTAATAGTACCAATGGTAAAAAGCAAGTCGTAAGTAAGAAACGAAATCGTCTTCAGAGAGATCTTGAAGCATCACTTGCACTGCTTCAACCCACACTGTTGAAAAAGGATTCAAAAATAGAAGAACGAGAAGTTTTATTTGCAAATTCTTATCTTCTGAGAGCTTCTGAAATACTAAAAGGAAATCCAGAAATATATGAAAAT…	TEENQNSSFTQTECVSFSSINQMTAQIPSEQLSTPVDSHAGIEILDEADEEIAEEEQDVTTSAASTNSTNGKKQVVSKKRNRLQRDLEASLALLQPTLLKKDSKIEEREVLFANSYLLRASEILKGNPEIYENFLSVLCKYHQ	Syntaxin-like_protein|PF14523.4;hAT_family_C-terminal_dimerisation_region|PF05699.12	NA	NA	186
TRINITY_DN11656_c0_g2_i1	type:internal	381	CGATCTAATAACTGCAAAGATCACTGGTGGTATAATCTGTTGTACATCAACAATTATATAGAGTCAGACAAAGTATGTCTGGATCACACGTGGGTGTTCGCAGTAGACGCTCAACTCCACATTATGGCTGTCTTCATTTTGATCCCTCTTAAAATGCGCCCCAAGGTTGGTCTCGTGGTCAACTTGGTCCTGGCCGTGGCCAGTCTCGTTTCGGTGGCTTTGACCAACGTATACTACGATCTCCCGCCTAATGAAGCACTCGCCTTCTTGCACGTAAAGGACAGGTACTTCTATGCGGAGCACTCTTACTACCGAATGTATTCACACATAGGATTCTATTGCACTGGTATATTCGTTGCTTACCTAGTACACATATACCCG	RSNNCKDHWWYNLLYINNYIESDKVCLDHTWVFAVDAQLHIMAVFILIPLKMRPKVGLVVNLVLAVASLVSVALTNVYYDLPPNEALAFLHVKDRYFYAEHSYYRMYSHIGFYCTGIFVAYLVHIYP	NA	XP_001647771.1	65.1	142
TRINITY_DN11659_c0_g1_i1	type:complete	429	ATGACTGCGAGTGCTCCGAGTTATGTGTTGGATCAAGTCGAGGAAGATGCTGGTGAACTTCAGTTTCCTAAAGAATTTGAAAATGCTGAAACTCTTTTAGTTTCTGAAGTGCTGATGTTGCTCGAGCACAGAAAACAACAAAATGAAAATGCCGAAGAAGAACAAGAACTCCCTGAAGTTTTTATGAAGACTCTAAATTATTGTCAGAGATTCAGCCGTTTTAGAAACAGAGAAACCATATCTGCAGTCAGAAGTTTGCTTACACAGAAAAAGGTTCATAAATTTGAACTTGCTCAGCTTGCCAATTTATGCCCAGAGACTCCTGAAGAAGCTAAAACATTGATACCCAGTCTTGAAGGGAGATTTGAAGATGAAGAATTGCGTCAAATATTGGAAGAT…	MTASAPSYVLDQVEEDAGELQFPKEFENAETLLVSEVLMLLEHRKQQNENAEEEQELPEVFMKTLNYCQRFSRFRNRETISAVRSLLTQKKVHKFELAQLANLCPETPEEAKTLIPSLEGRFEDEELRQILEDIQTQRSFQY*	Transcription_factor_Tfb4|PF03850.12;RNA_polymerase_Rpb4|PF03874.14	AAT68113.1	216.1	1082
TRINITY_DN11661_c0_g1_i1	type:complete	678	ATGAATTCATATAAATTTTGCAATTTGTATAGAGAATATCAAATTATAATTAGAAATACTCAAAGGATTTCTGCTGCTTCTGCACATATTTTAACTACAACAGGTACACGTATGATGAGGAAAGCTAGAAAATATAAACGTCCTGAAGAAAAAGTAGATCCTAACTATTATGGGATTGGTCCTAAGGAAGAAGTCAAAACAGCCCTTCAATCAATTATTGATAGAGGAATTTCCAAGGAGCTTCCTGCTTATAATCCACCTGCTGATGTAGATCAACAATTGCACAAAATTTGCAAAAAAGTCTTTGGTTCTGAACTCAGCAGTGATTGGAAGACACAGATATTAAGTGATCCTCTACTAAAATATAAGGTTCTTGCAAAGTGCATTGAAACTTTTAAA…	MNSYKFCNLYREYQIIIRNTQRISAASAHILTTTGTRMMRKARKYKRPEEKVDPNYYGIGPKEEVKTALQSIIDRGISKELPAYNPPADVDQQLHKICKKVFGSELSSDWKTQILSDPLLKYKVLAKCIETFKKNIPNSSLHKMKCVEDLLTFYNTPIDGHLPYDSLVRKSESLPPNLHVMPDRKSFDPATDTFFDGVSAFPGRKRVIYTKTGEKFEKVLEWPNI*	Ribosomal_subunit_39S|PF10501.7	NP_001006583.1	70.9	1194
TRINITY_DN11669_c0_g1_i1	type:internal	891	AGTGATTCAACGCACGAACTGGAGCAAAGATGCAGGAAGCTCGAAGACGACCTCAACTGCCTTGTGCTCCAGGTGACTCGGTGCCCGACCCCCAACCGGAGTGGAGACCTCATCAACAGGGTATGGAAATACATGCAGGACAACTGCGACGGATTCGGAGGTTGGTGGAGTTACGACTGTTTCCATTTGGAAGACATGAAGAAATGCGAAAAGATTTTTGCTTTGAGAGACTCCAAGACTTCAACAGCATCCTGCAGAGAATTCGATCGTTTCCGCCATTGCATCGGAGACGTGGTTCAGAAGCAGTGCCATCAAGAAGACGTCCTCTCCATGGGCAACTACCTCCTAGACAGTGCAGGGGACATGGTGTGGTCTTGCCCCCACCAGAGTGGGCCCCTC…	SDSTHELEQRCRKLEDDLNCLVLQVTRCPTPNRSGDLINRVWKYMQDNCDGFGGWWSYDCFHLEDMKKCEKIFALRDSKTSTASCREFDRFRHCIGDVVQKQCHQEDVLSMGNYLLDSAGDMVWSCPHQSGPLKSPIVDEGYVGVDVLPPLSPPLSGAASQKPSNRIAVEESHLRGVYSAALTGEGPFVTGCNARATEEMRGCLDRHQYERDQALGARDDEDRLRKECCATWNYRRCLQNAVRIHCYDTREVDIQSAVDVIPHDRGFLCRNHWIYTCSGAPCLLNGVSTFLLASRSE	Domain_of_unknown_function_(DUF19)|PF01579.16	NA	NA	256
TRINITY_DN11672_c0_g1_i1	type:5prime_partial	519	TTCTTCCGATCTAACCCTCCTGGTAACCAAAAAATTCTCTGGCTTAATGATCTAAAGCGCTTTATAATTATGGCATCGAATCCGTCTACTTCCACAGATTCTAAATCGGAGATAACTGACTCTCATACAGAACAACCTGAACCAATTCCCTCATCATCTATGACCAATCCACAACCTAGCACATCTGCAATGCCAAAAACAGCAGGGGAGACATTGTCAGAGTTTGTTCTTCATTTGGATGATTATACACCAACAATGCCTGATCCTGTTGTTACTTACTACATGCAATCTGCTGGGTTTTCTACAACTGACATCAGAATCACAAGATTGATATCTATTGCTGCTCAGAAATTTGTTTCAGACATTGCAAATGACGCTTTACAACATTGTAAAATGAGA…	FFRSNPPGNQKILWLNDLKRFIIMASNPSTSTDSKSEITDSHTEQPEPIPSSSMTNPQPSTSAMPKTAGETLSEFVLHLDDYTPTMPDPVVTYYMQSAGFSTTDIRITRLISIAAQKFVSDIANDALQHCKMRGAGQTKKTAKDKRYVLTMEDLTPALAEYGINVKKPHYFS*	Bromodomain_associated|PF07524.11;Transcription_initiation_factor_TFIID_23-30kDa_subunit|PF03540.11	XP_001179559.1	147.9	239
TRINITY_DN11684_c0_g1_i1	type:5prime_partial	549	TCATACTTAGGGAGACATCCTAAGCTGGCCTTAGTTCATAAGATCATAATCTTGGGTGTTGTGGAAAAAATTTGTAGTGAAGTATTAAATTCCATAAAAAAGAATGTTGCTGTTGAGCTTATTAAGCTAGCTGTTGAAGAAATGGTGAATACTAAGGAAATTGTACCTGAATGGCAAAACTTAGCAAGTGGAATTTTAGTGTCATTAGGTCGTAATTTTCATAATGAAGTTATGGAACAGTTGCTTTTGAAATTCCAACCTGGAGTCTTACCTCACTTTTTTGTTGTTCAGACCATGGCAAATTTAGCATCTGCAAATGTTTTTGGAATGGTACCTTTTCTGAAGTCTGTTCTTGGAACAATGCTTCCTTTATTAGGAATGGTAAAATCTGAAAATATG…	SYLGRHPKLALVHKIIILGVVEKICSEVLNSIKKNVAVELIKLAVEEMVNTKEIVPEWQNLASGILVSLGRNFHNEVMEQLLLKFQPGVLPHFFVVQTMANLASANVFGMVPFLKSVLGTMLPLLGMVKSENMKWIFAYALAKFCEAILEYIANAEKSPDPSVSKEAFVSEISSAYDVLFNN*	Bsp6I_restriction_endonuclease|PF09504.8	NP_001092750.1	174.1	290
TRINITY_DN11686_c0_g1_i1	type:internal	438	TCCGATCTCGCATATGACCAACTGAACAGGTGCGATCATGATTGCTTCAATACTGAGGGTGGCTACAACTGTTCCTGTCGCCCAGGTCACGTGGCTTTGGGTGAATTTAGATGCGAACCTTGCCGAATGAATTCCTACAAGAGCATGGATGACGAAGCGTGCATCGATTGCCCTCTGCACTCACACACGGAGGGCGTTGGGAAAACATCCTGGAAGGAGTGTATCTGCAATTCAGGATTTTCCGGAAATCTGGTTGACAACATTCCTTGTCAAGATATAAATGAATGCGCTATGGATAATTTCGGCTGCTCTGATATATGTTCCAATACCCTTGGTAGCGCCCACTGCGCATGCCCGCCTGGATTTGAATTACAAGAAGACCAAAAGACTTGTAGTGAC…	SDLAYDQLNRCDHDCFNTEGGYNCSCRPGHVALGEFRCEPCRMNSYKSMDDEACIDCPLHSHTEGVGKTSWKECICNSGFSGNLVDNIPCQDINECAMDNFGCSDICSNTLGSAHCACPPGFELQEDQKTCSDIDECSLKNGGCDG	Putative_ephrin-receptor_like|PF07699.11;Calcium-binding_EGF_domain|PF07645.13;Complement_Clr-like_EGF-like|PF12662.5;EGF-like_domain|PF00008.25;Human_growth_factor-like_EGF|PF12661.5;EGF_domain|PF12947.5;Coagulation_Factor_Xa_inhibitory_site|PF14670.4	XP_001664335.1	84.3	100
TRINITY_DN11687_c0_g1_i1	type:5prime_partial	423	TATGATACGCCTAGCGTTATGGCTCTTAACAGTCAGATACCGAATGAAATTTTCTTCAAATTGTTGATTAAATGTCCTGTTGACAGGCTTCAAAAATTAATTCACCATCTTGTCGACTTATTTTGTGGGCAGAAAATTGTCCTTTACGAATCCTTTGCTGATGTGTGGACTTTGTTAGAATGGTGGGATTTGATACGAAATAGCGAGAAATTTTTTCTTCATTATTATAGCTCATCTGAAACATTAACCTTAGCAAGTGACAAGATGGCACAAGTCAATGAGCCTCGATTGTTGCTGAATCTTGACATTTCTGGTGATAGAGATAAAACACTTTGTTTAGATTTGTCTAAAGAGGAATTAAAAATGTTAATTGAAACAATGGATAAAGCTAATAAAGCT…	YDTPSVMALNSQIPNEIFFKLLIKCPVDRLQKLIHHLVDLFCGQKIVLYESFADVWTLLEWWDLIRNSEKFFLHYYSSSETLTLASDKMAQVNEPRLLLNLDISGDRDKTLCLDLSKEELKMLIETMDKANKAVQDFIVD*	COMM_domain|PF07258.12	NA	NA	1158
TRINITY_DN11687_c0_g2_i1	type:5prime_partial	573	TATGATACGCCTAGCGTTATGGCTCTTAACAGTCAGATACCGAATGAAATTTTCTTCAAATTGTTGATTAAATGTCCTGTTGACAGGCTTCAAAAATTAATTCACCATCTTGTCGACTTATTTTGTGGGCAGAAAATTGTCCTTTACGAATCCTTTGCTGATGTGTGGACTTTGTTAGAATGGTGGGATTTGATACGAAATAGCGAGAAATTTTTTCTTCATTATTATAGCTCATCTGAAACAGCTGCTATTCTTTCATCATTACCTCAAGAATTTTCTAATGCATTGAATGATTGTTTGAGTGTCCGAAGTTCAGATTTAAAAAACAAACTTGTCGAGAAAACTCATGAGATTTCACCAGCTTATCTACATAACTTTGATTGGAAGTTAAAGTTAACC…	YDTPSVMALNSQIPNEIFFKLLIKCPVDRLQKLIHHLVDLFCGQKIVLYESFADVWTLLEWWDLIRNSEKFFLHYYSSSETAAILSSLPQEFSNALNDCLSVRSSDLKNKLVEKTHEISPAYLHNFDWKLKLTLASDKMAQVNEPRLLLNLDISGDRDKTLCLDLSKEELKMLIETMDKANKAVQDFIVD*	COMM_domain|PF07258.12	AAI53687.1	76.3	4357
TRINITY_DN11695_c0_g1_i1	type:3prime_partial	432	ATGATGATTACTGACGACGCTGCTCAGTACCATCAGTGGTACAATGATATAAACACTGTGAAGAAAATGATGTTGGATAATGGAGGAACAATATGCCCTACTTGCTGCACTCCTTTCGATAAAGGCAAGCATAGGAAACTGATTGATGCTTGTGGACATGAACTCTGCTACATGTGTATCAATTCTGATCATTGTCCACTTTGTGTATATCATGCCCAAGCGCAACAGCAACGCATCTCCCAAGAAAATGGAATCCCTAGACCTCGTCTGAAGACAAATGGCCATTTCACTGCTTATATGCAGACCAGGGAGCGAGTTTCCCCTGAGCGATCTCTACCTGTTGGAAATCTTCCTCCAAAAGCAAAACCATCTGTGCCAGAAAGAACTATAGCTGGATAC…	MMITDDAAQYHQWYNDINTVKKMMLDNGGTICPTCCTPFDKGKHRKLIDACGHELCYMCINSDHCPLCVYHAQAQQQRISQENGIPRPRLKTNGHFTAYMQTRERVSPERSLPVGNLPPKAKPSVPERTIAGYSPRISRASRSH	Primase_zinc_finger|PF09329.9;zinc-RING_finger_domain|PF14634.4;Zinc_finger,_C3HC4_type_(RING_finger)|PF13923.4;Zinc_finger,_C3HC4_type_(RING_finger)|PF00097.23;Rad50_zinc_hook_motif|PF04423.12;Ring_finger_domain|PF13639.4;Prokaryotic_RING_finger_family_4|PF14447.4	AAL50557.1	68.9	198
TRINITY_DN11698_c0_g1_i1	type:5prime_partial	423	TGTGCTCTTCCGATCTCTGGTTGTTACTCGTTCGTTGGTAAAGTTGGAGGACTTCAAGTACTTTCAATTGGCCGTGGTTGCGAATACTTGGGTACTATTGTTCATGAACTGGGGCATCTTATTGGGTTCTACCATGAGCATCAAAGATCTGATAGAAATAACTACATAAATGTCTACGAAAAAAATATTGTAAAGGGGAAAGAACATAATTTCCGACGAACTGATATAAATTATGAAAAAATCTTCACCAAGTACGATCACAAATCCATCATGCATTATGGCAGCTATGCTTTTTCGAAGAAACCAGGTCAACTGAAAACTATGGAGGCCAAAGACGGAAGTCTGTTGTTGGAACCCTACGATAAGACGGGTTTGAACAAAAGGGACATCGAAAAGGTG…	CALPISGCYSFVGKVGGLQVLSIGRGCEYLGTIVHELGHLIGFYHEHQRSDRNNYINVYEKNIVKGKEHNFRRTDINYEKIFTKYDHKSIMHYGSYAFSKKPGQLKTMEAKDGSLLLEPYDKTGLNKRDIEKVKKMYQCP*	Astacin_(Peptidase_family_M12A)|PF01400.22;Matrixin|PF00413.22;Peptidase_M66|PF10462.7	A0FKN6.1	125.6	439
TRINITY_DN11705_c0_g1_i1	type:internal	420	AAACGACTAATTTCTGATTTGAAATTTTTGCGATCAATTTTGCAGCAGTTAACTCGGCAGGACTGTGTTACTTTCTACAATATGCTCAAATCGATTAAAGAAAATGTTACAGTTGGTACACAGATGTCTGATTGGTTATTTCTTGATGCTTCAGATTCTTTATTCTTGAATGCTAAAGAGCGGGTTTTGGGGCCATCAAAAAAGAAAGATGCTGCAAAAGGTACTAAAAAGTTGTCTTTTGAAGAGAATGCTAAGTGGAAGGTGCTTTGTGACATTTTAACTGAAATATCAGATGAATGTAAAGATATAGAGAAACAAATGGTAATAATTATTGTAAATGATGATGTCATTAGCAGACAGTTAAAAAATGTCTTGAATGATGGTGCTCAAGAATATTTG…	KRLISDLKFLRSILQQLTRQDCVTFYNMLKSIKENVTVGTQMSDWLFLDASDSLFLNAKERVLGPSKKKDAAKGTKKLSFEENAKWKVLCDILTEISDECKDIEKQMVIIIVNDDVISRQLKNVLNDGAQEYLNNVFSKL	ALIX_V-shaped_domain_binding_to_HIV|PF13949.4;ThiS_family|PF02597.18;Thyroid_hormone-inducible_hepatic_protein_Spot_14|PF07084.10;YtzH-like_protein|PF14165.4	XP_001107209.1	85.5	50
TRINITY_DN11708_c0_g1_i1	type:internal	543	CAGTTCCTTTATAATAATAATACAAGACAACAGACAGAAGCACGTGATGATTTTCAATGCCCTTGGTGTCGTGTTAATTGCATAGAGTTGTATTGTCTACTCAAACATCTCAAGCTCTGCCACAGTCGATTTTGTTTCAACTACGTTCCTCATCCTAAAGGTGCTCGAATAGATGTTTCCATTAATGAATCCTATGATGGCTCCTATGTAGGAAACCCTAATGATCTGCATTCAACTGGTTTTGCATTCAGTCGTACTGGTCCAGCTCGGCGTAATCCTGTTACACATGTCATGGTGTGCCGTCCCAAAAGGCCAACTCCAAGTCTCTCTGAATTTTTGGAGCCTGATGACACTGAAACAGATGGCCCTCGCTCTTACATTTCTGGTCACAATCGCTTG…	QFLYNNNTRQQTEARDDFQCPWCRVNCIELYCLLKHLKLCHSRFCFNYVPHPKGARIDVSINESYDGSYVGNPNDLHSTGFAFSRTGPARRNPVTHVMVCRPKRPTPSLSEFLEPDDTETDGPRSYISGHNRLYYHTVTCLSVRPQEIDIDSESENDPQWLRIKTQHMIDEFTDVNEGEKE	VEFS-Box_of_polycomb_protein|PF09733.7	NP_001072292.1	286.2	342
TRINITY_DN11715_c0_g1_i1	type:5prime_partial	432	GAAATTGCCAAAGTCATACCATCACTTCCTGATAGGAATCATAAAACTAGAGCTCGTGCTGGAAATTCTTTTCTTGATTCTCATGATCCAGCTTTAGAAAATGCAATTGAATGTGGACTATGTAAAATGTATTTTGAAAGCAGATACTTTTTAAAAAAGCATTTCCTTGAACATCATCCAGAACAAAGAACTTATGAATGCACATTCTGTAGCAAGAAGTTTCTGACGGATAGTGAACTGGTTTTTCATTTGCGAACACATACTAAAGCCAAGCAGTCTTGTACTTTATGTGGTAAAAGTTATGCCCATGTTTCATACTTGCATCGGCATCTCCTGACTCATTCCAACTGTAAACCTTATTTATGTTTGTTGTGTGGGCAGAAATTCCTTGAAAAATCC…	EIAKVIPSLPDRNHKTRARAGNSFLDSHDPALENAIECGLCKMYFESRYFLKKHFLEHHPEQRTYECTFCSKKFLTDSELVFHLRTHTKAKQSCTLCGKSYAHVSYLHRHLLTHSNCKPYLCLLCGQKFLEKSILKKHYQKTH*	Drought_induced_19_protein_(Di19),_zinc-binding|PF05605.10;C2H2_type_zinc-finger_(2_copies)|PF12756.5;Zinc_ribbon_domain|PF09723.8;Zinc-finger_double_domain|PF13465.4;Zinc_knuckle|PF13696.4;Zinc-finger_double-stranded_RNA-binding|PF12171.6;PX_domain|PF00787.22;C2H2-type_zinc_finger|PF13894.4;zinc-finger_C2H2-type|PF16622.3;Arsenite-resistance_protein_2|PF04959.11;Aspartate_carbamoyltransferase_re…	CAA50016.1	87	277
TRINITY_DN11719_c0_g1_i1	type:3prime_partial	402	ATGTGGGTGAAACCGCAAGAAGTCGCTTTTGCGAAATCATTATGGGTTATTGAACATGCAAATCCTTTCTTCATACTCCAGCAGAGGAAGGGTTATGGCACAAGAGGCTTATCTTCCCTTTTTGTGGGTACTTTTGATAGTGTGTTTGATACGAAGCCTCTTCCCTTTCGAATTATCCTTCATTCCTCTGCAACAGACAAGAATCCTCTTATCGTTGCAAGTGCTTTTACGAAAATTGAAATCACCGACCATTGGGAATGGCTAGAGAAAAATGTTGTACCAACTTTGAGTGCTTTTGATAACACTGATGAAATGAGAAATTTAGTTGTGTGTAAACTTGAAAGATTGGTAGCTCAGAGATCTTGTGATGGCAGCCAAGGGATCGGAAGAGCGCCGTGT…	MWVKPQEVAFAKSLWVIEHANPFFILQQRKGYGTRGLSSLFVGTFDSVFDTKPLPFRIILHSSATDKNPLIVASAFTKIEITDHWEWLEKNVVPTLSAFDNTDEMRNLVVCKLERLVAQRSCDGSQGIGRAPCS	NA	BAC29068.1	109	166
TRINITY_DN11728_c0_g1_i1	type:5prime_partial	300	GCTAAATTTCGAACAAATGGAGATAGTGACAGCAATGAGGAAAATCCGCCATCTTCAACACATCTTGGTACACCAAGATCCTTTTCAGAATATGATGGATTACTTGATGACATGAGGAATTTTATTGCATTCCAATCTGCATCAAATGGTGCAGCCACAACAAAAGAGCTTTTATGTGCTTTTAAAACTAAAATTAAAGTAAAGGATAATGCTATATTTAAGGCATTGCTATATAAATTATGCACTTATTCTAGAGCTTCAGGAGAAGGAGTATGGTATTTGAAAGATGAATACAAGTAA	AKFRTNGDSDSNEENPPSSTHLGTPRSFSEYDGLLDDMRNFIAFQSASNGAATTKELLCAFKTKIKVKDNAIFKALLYKLCTYSRASGEGVWYLKDEYK*	BRCA2_repeat|PF00634.16	EAW93096.1	75.5	108
TRINITY_DN11738_c0_g1_i1	type:internal	543	GAAACTCCTACATTTCTTAGTCGTCAATATATTGCAGAAATAAATGAAAATGCAGAAGTAAATGTTCCAGTGAATTTGTTAGGTTCCAGCATTGCTGAAGTGTTTGATCATGATCAGGGAAACAATGGAACTTTCAAGATCTTTCTGGAGGGTGATGATTCTGTATTCGATGTTACTCCATCAGAAGGTGTAAATGAAGCTTCATTTCTTATTCGAGTAAAGAACTCTTTAGCTTTAGATTATGAAAGGATACAAGAATTCAATTTTAGGATTGTTGCTCAAGAAACTGTTCCAATTATGCCAAAATCTAGCACAGCTGATGTTACAGTTTATATACGTGATGTGAATGATAATTTTCCTGAATTTTCTGAGGATGTATATCGTGTGTCTGTTCCAGAA…	ETPTFLSRQYIAEINENAEVNVPVNLLGSSIAEVFDHDQGNNGTFKIFLEGDDSVFDVTPSEGVNEASFLIRVKNSLALDYERIQEFNFRIVAQETVPIMPKSSTADVTVYIRDVNDNFPEFSEDVYRVSVPENAAEGTILTTIRAHDKDSGDFGTKGIRYTDLRGQIAEKLHLDPVSGVV	Cadherin_domain|PF00028.15	XP_001652377.1	199.5	308
TRINITY_DN1173_c0_g1_i1	type:internal	357	TCTAAAAAATATGATATATCTGAAACATTGTTGAAACTACAAGCATTTAAATTAAAAAGCATAAACAGAAATAAATCATGTGAAAGCTCTTGCGGCATGGACTGTGAAAATATTAGTCAAGATATTAATCCAAAAGTTCCTATTAGTCAAGAACAGCAAGAAACAACAACTCAAGAATTGAGTAAAGCTGAAATGAATACACACACATCTAAAAACTTTAAACTTAATGATACTGCTGATAAAAATTTGAAATATACTGCTCTTGAGAAACAATATTTAGAACTTAGAAATAAATACCCTGATGCTTTGTTATTAATAGAATGTGGATATAAATACAGATTCTTTGGAAAAGATGCT	SKKYDISETLLKLQAFKLKSINRNKSCESSCGMDCENISQDINPKVPISQEQQETTTQELSKAEMNTHTSKNFKLNDTADKNLKYTALEKQYLELRNKYPDALLLIECGYKYRFFGKDA	MutS_domain_I|PF01624.18	AAI30435.1	61.2	49
TRINITY_DN11742_c0_g2_i1	type:complete	564	ATGAGGAAACTTTCTCGCTCTAGCCGCCGTCCTATCTTCGGCCAGATGTTGACGGGAAGAATCGTGATTACCACCTGTATGATGGTTGTAATCACAGCGGTTCCGGAGAAAATACCCATTGGAGCGATTTTTCCACCTGGTACAGATGAACTTCAAACTGCTCTCAAATATACCTTCCATATGCATAATACGAACGATTCACAAGCTCGCTTTAAGGTTGAGCCCATCATTGATCTTGTTGACAGCGAGGATCCATTCAAAATAGCCCGGACATTATGTCTACAGATGAACAGGGGCATCTTCACCCTCGTAGCTCCAACGGGAGAAGCCTCTTACGATACTTTAGCGTCATACTCTAATACATTCCAAGTGCCATTCATAAGTCCAGCCTTTCCAGAG…	MRKLSRSSRRPIFGQMLTGRIVITTCMMVVITAVPEKIPIGAIFPPGTDELQTALKYTFHMHNTNDSQARFKVEPIIDLVDSEDPFKIARTLCLQMNRGIFTLVAPTGEASYDTLASYSNTFQVPFISPAFPELSSDRPAYYGLSLRPRYLRAILDVIIYYNWKIIYYLYDTDGGSMWSITQGINDS*	Receptor_family_ligand_binding_region|PF01094.26	CAB64939.1	112.1	1223
TRINITY_DN11746_c0_g1_i1	type:3prime_partial	417	ATGCCCTCCTGTTCTTTTTCTGAAGCTCTTGAAATTAGATATGTTGAAGACATTGATGCTAATCCTATAGAACCTTGTGAGATATTTCTTGTTGGCAGCTTTCCTGGGCGATCCAGCCCTAGTGGAAGACTAGTTCTTCCTCGAACACTAACTTTAAATTGTTGTGGTATTGATCGTGCTGGAGTCTTACGCAAGATAGATGAACTTTGCCATGATGTTGAAGAACTTGATTTAGCCCAAAATGAACTTAGTGACTTGAATGAAGTTGATAATATTTTGCAACATATGCCGAATTTATCATTTCTGAATTTGAGCTACAATGACATGAAACATGCAACTACAGAAAAGTTGACAGAAACTGAAAATCTGCGTAGCTTGGTTCTCAATTGTACATATGTT…	MPSCSFSEALEIRYVEDIDANPIEPCEIFLVGSFPGRSSPSGRLVLPRTLTLNCCGIDRAGVLRKIDELCHDVEELDLAQNELSDLNEVDNILQHMPNLSFLNLSYNDMKHATTEKLTETENLRSLVLNCTYVPWSIVC	Leucine_Rich_Repeat|PF00560.31;Leucine_Rich_repeats_(2_copies)|PF12799.5;Leucine_rich_repeat|PF13855.4;Leucine_Rich_repeat|PF13516.4;Leucine-rich_repeat|PF14580.4	BAC34901.1	74.3	324
TRINITY_DN11750_c0_g2_i1	type:5prime_partial	366	TTTAAAGGTCATCAACAACAAAATGAATTTGAGTACGGAAAACAAATACAATCAAACAATCTCGCTTGGGCGCGAGAGCAACAACAAAATCAAAACCAATTTACCAAAGAGTTAGTAGAAACGAATTTGGATAGTGATATACGGCGTGCACGTAATGCACAACAACTAGCAGGTTACCGAACCGACGCGACAGTTTCTGGTCTAAGTTATGGATCAGGAAGGGGTGGACTTGGCCACCCCGATGCACCGCGCGGAATGCCACTTCCTCCACGCTCGTCTTCAACTCAAACTGACTCACCAAAGGTATATTTAACCCGTCCAACAGGGTATTATACTGGTCCCCTCTCTGGTTCAGAGAAGGTTTAA	FKGHQQQNEFEYGKQIQSNNLAWAREQQQNQNQFTKELVETNLDSDIRRARNAQQLAGYRTDATVSGLSYGSGRGGLGHPDAPRGMPLPPRSSSTQTDSPKVYLTRPTGYYTGPLSGSEKV*	NA	NA	NA	152
TRINITY_DN11751_c0_g1_i1	type:5prime_partial	459	ACAGCTGAAGTTGTACATATTGATTTTGGAATAGCTTTTGAAAAGGGAAAAATATTGGCAACACCAGAAACTGTTCCTTTTCGTTTAACTAGAGATATAGTTGATGGAATGGGAATAAATGGAGTTGAAGGTACTTTTAAAAGGTGCTGCGAAAAGACACTGGAAGTAATGAGAAATTCTCAAGATGTACTCTTAACTATATTAGAAGTATTATTACATGATCCATTGTATGAATGGAGTATACCTGCAGCTACACAAAAGAATAACAATGTATCTAATTCACAAAATGAAGTTAATACATTAGCTGAAAGAGCTTTAATGAGACTCCAACAAAAGTTACAAGGGCTTGAGGAAGGAGTAGCAATGAGCATAGAAGGTCAAGTCAATCTCTTAATACAA…	TAEVVHIDFGIAFEKGKILATPETVPFRLTRDIVDGMGINGVEGTFKRCCEKTLEVMRNSQDVLLTILEVLLHDPLYEWSIPAATQKNNNVSNSQNEVNTLAERALMRLQQKLQGLEEGVAMSIEGQVNLLIQQARDPNNLCRIYAGWQPYL*	FATC_domain|PF02260.18;Phosphatidylinositol_3-_and_4-kinase|PF00454.25	NP_001155872.1	139.4	534
TRINITY_DN11755_c0_g1_i1	type:internal	297	CAGAACACTGCATTAGTTTCCATTCAAAATTTACTGAAAAATACAGAAACTGCAAATTCAGACTGTCGTACCAGATTGCATAGACTGACAAAGAATGCATTGCTTACACAAAAAGAGCAAAAATCAGATATTCAAAAACCAACTACAAAAAAGATGGTCTCAAAACCTATACAGCCTGTGGGAAGAAAAACAACAAGATTAAGAACAGTCCAGCTTCGTCCAAATAAAAAACGGGCTCCTTATTATGATGAAAAAGACAAAGTTGCTATGAGGAAAATGGATAAGGCTCGTTGTAGA	QNTALVSIQNLLKNTETANSDCRTRLHRLTKNALLTQKEQKSDIQKPTTKKMVSKPIQPVGRKTTRLRTVQLRPNKKRAPYYDEKDKVAMRKMDKARCR	NA	NA	NA	126
TRINITY_DN11765_c0_g2_i1	type:internal	729	AAGGCCAAAACCTCCTGGGTTGGATCCATCTTTTTCAGCATGCCATTGTTAGCTGGTCCCGTTGCAAGTTATCTCATCGATCGCTATGGTTGTCAGAGGATGTGTATTTTGGGTGCACTACTTTCGACCGTGTCTTTCGCCGTCAGTGCTCTCGCTGATTCCCTTGAAATGCTCTTCTTAACATATACCATCGCTGGTCTGGGTCTTGCATTTTGCTACGTCACTTCTATCGTGATAGTTGCATACTACTTCGAGAAAAAGAGATCTCTGGCGACGGGCCTAGCTGCTTGTGGAACTGGCATCGGTACATTTGTTCTTCCTGTCATGACCAGTATATTGGCTGAGGAGTATTCTTGGCAAGGAACCCTTTTGATTTTATCTGGTTTCTTACTCAACATG…	KAKTSWVGSIFFSMPLLAGPVASYLIDRYGCQRMCILGALLSTVSFAVSALADSLEMLFLTYTIAGLGLAFCYVTSIVIVAYYFEKKRSLATGLAACGTGIGTFVLPVMTSILAEEYSWQGTLLILSGFLLNMVVFGALMRDLESPTLDEDNTSEGKPNNALGIGVLENSERLCSSMVQLPTYLQENCPEVISELSSKEGTHLSSLLEQHPYLLDAIIKKDPDGSVESSSVTPHGEKEKSTKK	MFS/sugar_transport_protein|PF13347.4;MFS_1_like_family|PF12832.5;LacY_proton/sugar_symporter|PF01306.17;CLN3_protein|PF02487.15;Uncharacterised_MFS-type_transporter_YbfB|PF06779.12;Predicted_membrane_protein_(DUF2070)|PF09843.7;Sugar_(and_other)_transporter|PF00083.22;Nodulin-like|PF06813.11;Major_Facilitator_Superfamily|PF07690.14;Domain_of_unknown_function_(DUF4191)|PF13829.4	XP_393553.3	18.5	251
TRINITY_DN11767_c0_g1_i1	type:5prime_partial	342	AAACTACACTCGCAAGACTACCAAAAACTGTGTCAGAAAAAGAGCTTAGTGGTGGACTTTGAGAAATTAGGATGGGGTGACTGGATCATGTCACCGAAATCATTCAATGCTTATTATTGCTCTGGAGCGTGTTCATTTCCCGTCATTAAGGACGCCCATCCATCCAATCACGCTGCAATCCAGAGCCTTGTACATGCCATGAGATTGGGTCCAAACGTTCCAGCTCCATGCTGTGTTCCTTCTGAGACAAAGCCCCTTACGTTGCTGTACTTCGACGAACACAACAGCCTCGTGCTGAAGAATTATCCCAACATGATTGTGGAAAAATGTGCATGCAGATGA	KLHSQDYQKLCQKKSLVVDFEKLGWGDWIMSPKSFNAYYCSGACSFPVIKDAHPSNHAAIQSLVHAMRLGPNVPAPCCVPSETKPLTLLYFDEHNSLVLKNYPNMIVEKCACR*	Putative_Sin3_binding_protein|PF10330.7;Centriolar_protein_SAS_N-terminal|PF16531.3;Transforming_growth_factor_beta_like_domain|PF00019.18	XP_001089525.1	142.5	205
TRINITY_DN11772_c0_g1_i1	type:internal	423	AAAAATATTGTTTTTCGTCATGTGTTTTTGTTTTGTTTCTCATTATTCCTGGCGGGAAAAGTTGATAACATTGAATTTCCGAAAAAAGAAATCGACCAGAAAACTAGTGTTGCAACGAAAAACGATCGCAAGGAACCCAAGGCATGGAACTGTGAACTGGTAAATGCTTGTGATGATAAACTGGGATTTGAGGCAATTTTAACTCTTCACCAGCGATTAGATGATGATGCAGATGGAAATATAGATATTGTTGAAAGTGATGAGTTCTTTCGAGATGAATTGAACTATAAAAGTGGGTATGAGAGACAAAAAAGATTTCATCGAAATGATAAGCACATATCAGTTGATGAATTATGGTCTTCATGGAAATCATCAGAAGTTCATGACTGGACTGTTGAA…	KNIVFRHVFLFCFSLFLAGKVDNIEFPKKEIDQKTSVATKNDRKEPKAWNCELVNACDDKLGFEAILTLHQRLDDDADGNIDIVESDEFFRDELNYKSGYERQKRFHRNDKHISVDELWSSWKSSEVHDWTVEETVQWLLS	NA	NP_991397.1	111.7	173
TRINITY_DN11785_c0_g1_i1	type:internal	312	TACCTACCAAACAGTTTGGTAGGTAAAATGATACCAGTTCAAGTTGGCTCCATTTCTCGTAATCCACTATCTCAGAAGCTGATTCCTGTACCCATACCTAAAGTTTCAAGCATAAAGAAAAGTCCATTAGTGGAAAAACAAAAAAGGGACGTTGCTTTGAATGGAACAGAAAAAATCGTTGGCAGAAGGACTGTAAATTTTTCTTCATTTCGAGGTGATGTCAAAAATAAAAGTAAAGACTCTCATTGCAAGAACAGAGATGAAGAGCTCTCCAACCCTTCTAAAAAAGAACATGAAACTTTCGCATCATCC	YLPNSLVGKMIPVQVGSISRNPLSQKLIPVPIPKVSSIKKSPLVEKQKRDVALNGTEKIVGRRTVNFSSFRGDVKNKSKDSHCKNRDEELSNPSKKEHETFASS	Unstructured_region_between_RBD_and_GoLoco|PF16611.3	NA	NA	37
TRINITY_DN11800_c0_g1_i1	type:internal	750	AATAAGTGCAATTGTTGTACATTACATATTTATTACATATTAATTAATTTTCTTGCTGAAAATATGCCTGAAAACAGTGGGTACAAATTTTGGAGGGAAAAATTAGGTTCTCCTCGCCTAATTTTAGCTCCAATGGTCGATCAAAGTGAACTTGCTTGGCGCATGTTAGGACGTAAATATGGAGCTGAATTATGCTACACTCCTATGTTACATGCTTCAGTTTTCGTAAAAGACTCAAGATATCGAAAAGAAAATTTATTATCATTTCCTGAGGACCGTCCCTTGATTGTACAGTTTTGTGCAAATGACCCAAATACTTTTGTGGAAGCATGTAAACTTGCTGCCGACCACTGTGATGCTGTAGATTTAAACTTAGGTTGTCCACAAGCTATAGCTCGT…	NKCNCCTLHIYYILINFLAENMPENSGYKFWREKLGSPRLILAPMVDQSELAWRMLGRKYGAELCYTPMLHASVFVKDSRYRKENLLSFPEDRPLIVQFCANDPNTFVEACKLAADHCDAVDLNLGCPQAIARRGRYGAFLQEDWDLLQEMVSRVHNEVDIPVTCKIRVFPDILRTIQYAQMLEAAGCQLLTVHGRTKEQKGSKTGLASWEHIKAVKLSVKIPVFANGNIQNVADVQRCFEETGVDGVMI	Thiazole_biosynthesis_protein_ThiG|PF05690.12;FMN-dependent_dehydrogenase|PF01070.16;Histidine_biosynthesis_protein|PF00977.19;Dihydroorotate_dehydrogenase|PF01180.19;Dihydrouridine_synthase_(Dus)|PF01207.15;Thiamine_monophosphate_synthase/TENI|PF02581.15;SOR/SNZ_family|PF01680.15	NP_742015.1	341.3	356
TRINITY_DN11803_c0_g2_i1	type:3prime_partial	324	ATGCTGCAAGTGTGTGTGTCGCTCCAGATATGGAAAGCCTTCCACAAGAAAATAAAAAAGAGCGGGAATGCGTTGCGGGGGAATTCCACGGACGCCGTTCGGAGCCTATGGCCCAAGGATGGCGGTCCGGGGGACAACCCCTTCTATAGCAATATTGACTCCATGCCTGACATTCGACCCAGGCGGAAGTCCATTCCGCTCGTCAGTGAGTTGACGATGGCAGCAACAAAGAGGAATGCTGGTCTCACTTCCGCTGTGCCCCGGCAGTCTCTCAACGACGAGGAACTGAAAACCCACGTGTACAAGAAGACCCTTCAGGCCCTG	MLQVCVSLQIWKAFHKKIKKSGNALRGNSTDAVRSLWPKDGGPGDNPFYSNIDSMPDIRPRRKSIPLVSELTMAATKRNAGLTSAVPRQSLNDEELKTHVYKKTLQAL	NA	AAL39704.1	127.1	106
TRINITY_DN11804_c0_g2_i1	type:internal	1008	ATTGAGAATTCAAGAAATTATAAAAAGTCCCCAAACAAGTCTAATTCAAAGAGAATAACTGTCAGAAGGAATTCAGCGGACAATTCCAGTCTTGTTTCCACGGACGACAGTCGACTAATAGAAGAACATTCATCCTCTACACATTCCGATAACTCATCTGACGAGTTTTATTTGAGAGTATGTTGTAACTCTTCCGTCAAATCAAGTTTCCCGAGTAATTCTGATACGGAAAGACTGTTAATGTCCTATGGCGAATATCTTCCTAGAACGCAAAGAAAAAAGAAACTCCAGAAAATTTCTAAGCTCAATTCGAATTTTGGAAGACGGCGATCAAATACTTTTCACACTAACAGAGATTTACAAAAACCAACAATCATTGAACATGCACCTCAAAAATGC…	IENSRNYKKSPNKSNSKRITVRRNSADNSSLVSTDDSRLIEEHSSSTHSDNSSDEFYLRVCCNSSVKSSFPSNSDTERLLMSYGEYLPRTQRKKKLQKISKLNSNFGRRRSNTFHTNRDLQKPTIIEHAPQKCHSFRVPREIYEGPIINRTPYIRRKHQNLNLNIRTQVDTSCKVMKSKTFQETTQLSKRDDDFFENYNNSLLREVASDSKIPLIMQITKYSDQYGEKKAGKLPTRSMSDKTKKEMATDKESTQKKRLKKRLKSPDTPAVAAAFPDVGTTSNMSGNTSAQHNRKRCSNSSQNTNTSKKYENELPKENDESQLGTRNGSAEVPTITI	NA	NA	NA	470
TRINITY_DN11817_c0_g1_i1	type:5prime_partial	327	GGAATTCGAGTGAAGCGACAGAATGCATCGAGCTCGATGTGGAGTCGGACTCAAGAGCTGAGGTGGCAGGGAATGCTTTGGGATTTACTCATTAGCAAGCGTAACATCCGGGGGGCTACAGGACCTGTGAAGCGGACCGATACACCATCACTACAAGGATCGTCCCTGCTCATTGGTCTCCATGATGGTCGAAGGATGCGCCAAAGGGGTGAAGTATGGCCTCTTCGTTGCCAATGCTGTCATATTAATTGGTGGCATTGTAGTCTTCAGCGTTGGCATCTGGACATTGTCCGATCGATCTTTTATGGAGCGTCTCTTGGGCAGTGA	GIRVKRQNASSSMWSRTQELRWQGMLWDLLISKRNIRGATGPVKRTDTPSLQGSSLLIGLHDGRRMRQRGEVWPLRCQCCHINWWHCSLQRWHLDIVRSIFYGASLGQ*	Baculovirus_protein_of_unknown_function_(DUF843)|PF05814.9;Tetraspanin_family|PF00335.18;Putative_Actinobacterial_Holin-X,_holin_superfamily_III|PF07332.9;CD20-like_family|PF04103.13;Etoposide-induced_protein_2.4_(EI24)|PF07264.9	XP_975304.1	166.4	489
TRINITY_DN11823_c0_g1_i1	type:5prime_partial	414	CTTGCATTTCTCATATTACACTTACAAAGAGTTGCAGAAGCACATGAATGTAGGATGCCTTTAGAAAATCTTGCCAAAGTTTTTGGACCTACCATAGTAGGATATTCTAGTGCTGAACCAGCTGATGCTCATATGCTGACAGAAACAAGACAACAATGTCAAGTGATGCAAAAACTGCTCATGTTACCGGCAGATTCTTGGCAAAATATCTTAAATGTTGAATTACCAGAAGTCTTCAATGTACCCCAATTAAAAACTCCTGATTTAACTCCAGCACCTGTAGTTTCAAGACTAGGACCTATTTATGCATCTGGTGAACCAAAAAGTGCCCAGGTTGGAAGGACACCTCTTACACCCAGGAATGTAAAATATAGTACAAGAAGTGGCAAACGATTTCTT…	LAFLILHLQRVAEAHECRMPLENLAKVFGPTIVGYSSAEPADAHMLTETRQQCQVMQKLLMLPADSWQNILNVELPEVFNVPQLKTPDLTPAPVVSRLGPIYASGEPKSAQVGRTPLTPRNVKYSTRSGKRFLGTPR*	RhoGAP_domain|PF00620.25	XP_783360.2	90.5	222
TRINITY_DN11825_c0_g1_i1	type:3prime_partial	336	ATGAGTGAAAAAATTAAACTTGAACGAAATTTAAACGAAGTTTCAAAGGTTGATAAACCAACAGAGTCCAAACCAAAAGACACCTATACGTGTCATATCTGTTTCAAATCGTTTTCTCATAAAAGTGACTTTACTAGACATTGCTTTCGACATACTGGCGAAAAACCTCATGTTTGCGATATCTGTAGCAGAAGTTTTGGATGCAGATCTAATCTCACTCGACACCGTCGTCTCCATACGAAAGAATCAGAATATGAGTGTAATATTTGTTTGAAATCATTCAATCGCAGAAGCCATTTAAAAGATCACATTGCAATTCACACAGGTGAAAAACCA	MSEKIKLERNLNEVSKVDKPTESKPKDTYTCHICFKSFSHKSDFTRHCFRHTGEKPHVCDICSRSFGCRSNLTRHRRLHTKESEYECNICLKSFNRRSHLKDHIAIHTGEKP	C2H2-type_zinc_finger|PF13912.4;Ring_finger_domain|PF13639.4;BED_zinc_finger|PF02892.13;BolA-like_protein|PF01722.16;Zinc-finger_double_domain|PF13465.4;C2H2_type_zinc-finger_(1_copy)|PF16293.3;RING-like_zinc_finger|PF17123.3;zinc-RING_finger_domain|PF14634.4;Vacuolar_protein_sorting_36_NZF-N_zinc-finger_domain|PF16988.3;Zinc_finger,_C2H2_type|PF00096.24;KIAA1045_RING_finger|PF16744.3;Baculovirus…	NP_666297.2	105.1	133
TRINITY_DN11832_c0_g1_i1	type:complete	390	ATGTCTGAGACTGAAGAAGTTGGAGTATGTTCTGGTGATAACTTAAATAAGCCATCCATTAAAATATTGTGTAGACAGAATTCTAGCCAAACCAGTCAGTCAGACTTTACTGAACCTGAACTTTTATCAGAACAGAACTTATTTGAATCAAATCAATCTATCGGTGTAAAAGAACTAAGTGATTCTGTGTGTTCAAATGAAAATAATGTAGATTCAGTGCAAAATGATGACAACAAACCATCTTCAGAATTAAATATTTGTGGATATACTAACATAGAAATTATAAGCAGGGAAAATTCATCTGAATATGAAATTATTTCTGTACCTATAGTTAATATTATCGATGAAAAATATTGGAAAGAAAATGTTTTGCTCATTGAAAAAGTATAG	MSETEEVGVCSGDNLNKPSIKILCRQNSSQTSQSDFTEPELLSEQNLFESNQSIGVKELSDSVCSNENNVDSVQNDDNKPSSELNICGYTNIEIISRENSSEYEIISVPIVNIIDEKYWKENVLLIEKV*	NA	NA	NA	641
TRINITY_DN11836_c0_g1_i1	type:5prime_partial	1182	ATACTGTACGGATTTTTGGCCATTTTATTTTCTTTTTACCTCATCATCATTGGAATAAAAGGAATTGATCGACTCTACATTTTTATGCGGGTGACACTAAGCCTTTTCATTGGAGCTGTAATCCTAATTTGTAACTTTGCTTATGGCTGGGAATACGGTTCTGTAAAGGCTACAACTCCGTACAAATCATTCATAAGCGAACAAGTGCGTGCAGAAATTGGTTTGAAAGTTGGTTTAAGAGGAATCAATGTAACTCTTCTAGGTCTGCCACAAAATCAGCTTAATGAAACAATAAACTACAACGAACGGTTTTCTTGGCAATGGGTTCAAGGAAAGCCAGGATTTGAAGAGGATGCCGGTCGATTAAACAGAGAATACCGTGCTGCCCAATGGAAAGGA…	ILYGFLAILFSFYLIIIGIKGIDRLYIFMRVTLSLFIGAVILICNFAYGWEYGSVKATTPYKSFISEQVRAEIGLKVGLRGINVTLLGLPQNQLNETINYNERFSWQWVQGKPGFEEDAGRLNREYRAAQWKGLPYPILWVVEYFTIDEGNFRHGRYYRIAGWNCHIALWMAFPLWLLSNILFFMVIRYGAYFLSLTGGCLLLTNLLFVSIRNAVPVDLRFQSRPLVLHYDWCFWLVLFTGLLCELLAAIIIFMDLRFPEEIAMFFGIDILQDYEDYYADPAELGLVPPEVVAGTSGDREGTFLRRAAAHTQDVCALRKRTMSSRFQRSSQRRPAPAPRDTQRLIKGQTKRASELPVYENLNLTRFDPIGEEDEPKDGSFEKILLRDIKSLNK*	Dual_oxidase_maturation_factor|PF10204.7;Predicted_membrane_protein_(DUF2105)|PF09878.7	XP_971705.1	240	383
TRINITY_DN11850_c0_g2_i1	type:5prime_partial	321	AAAACTGCTGAATGCGATGTAAGCACTTATCTAGATGAAGATTTCACAATAGTAGCACTCATCTTTCCCAACATTCCTAGGCCATCCTCTTTGCAAATAGAAGCGTGCTACCAAGAAGCCATGAAATTACAGTCCCTTGTGGAACAAAGAAGTCCAACCCTAGTCACAGAGATTCCATTATCAGCTTTGACGGGAAGCTATCTTGTGCAACCAATGTCAAATAGTAAAAGCTCAGGTTCTGTAAGATTCATCAATACTTTTCTACAAATTATGATTGTCCTTGTAGTGATGAGGACAATGATGGCTGGAAATATTACGTGA	KTAECDVSTYLDEDFTIVALIFPNIPRPSSLQIEACYQEAMKLQSLVEQRSPTLVTEIPLSALTGSYLVQPMSNSKSSGSVRFINTFLQIMIVLVVMRTMMAGNIT*	NA	AAK93562.1	54.3	216
TRINITY_DN11854_c0_g1_i1	type:5prime_partial	324	AAGACCCTGCGGCTCCGGAGGCAGCCAAAATATCCTCGGAAGAGTGCGCCCAGGAGAAACAAGCTTGACCACTATGCTATCATCAAATTCCCACTGACCACGGAGTCAGCCATGAAGAAAATAGCGGACAACAACACTCTTGTGTTCATTGTGGATGTCAAGGCCAATAAGCATCAGATCAAACAGGCTGTCAAGAAACTCTATGACATCGATGTGGCCAAAGTCAATACCCTGATAAGGCCCGACGGAGAGAAGAAGGCGTATGTTCGCTTGGCTCCTGATTATGATGCCCTAGATGTTGCCAACAAGATTGGGATCATCTAA	KTLRLRRQPKYPRKSAPRRNKLDHYAIIKFPLTTESAMKKIADNNTLVFIVDVKANKHQIKQAVKKLYDIDVAKVNTLIRPDGEKKAYVRLAPDYDALDVANKIGII*	Ribosomal_protein_L23|PF00276.18;Ribosomal_protein_L23,_N-terminal_domain|PF03939.11;Ribosomal_protein_L6|PF00347.21	AAH26656.1	211.5	130
TRINITY_DN11859_c0_g1_i1	type:internal	564	AGAAATGCTCAAAATTTTTTTGTTGAAGATTTGGCCAGACATGCCCATAAAAAGAATTACTTGAAGAGTGAGTGGTTCAAGAGTCTAAAAGTTCAGTGGGCTGCTAATACTGATAATCTTGAAACTTACACAACAAAGATAAAGATTCGTTACAATTCTTCTGGACTTTATCCTATTCGTTATGACAGATATCCTTTGCAATATAAGGCTGCTGAAGTCAAACATGGTTATTGGACTGCACCTTATTTTGATTGTGGGGGTTTTCACAATCAATGGCTGATTACCTATGCTGCTCCATTTTTTGGATGGGACAAGATTAAAAGTCGACTTGAATTTAAAGGGGCTGTGGCTGTAAACATGAAACTTGAAGGATTAGATATAAATCAATGTGATGACGAC…	RNAQNFFVEDLARHAHKKNYLKSEWFKSLKVQWAANTDNLETYTTKIKIRYNSSGLYPIRYDRYPLQYKAAEVKHGYWTAPYFDCGGFHNQWLITYAAPFFGWDKIKSRLEFKGAVAVNMKLEGLDINQCDDDYYVQNAFKGSHKCDRRSSRCVPILGRGFDTGGYKCQCNQGYEYPFNDYITYIDGQ	Coagulation_Factor_Xa_inhibitory_site|PF14670.4;Complement_Clr-like_EGF-like|PF12662.5;Calcium-binding_EGF_domain|PF07645.13;Human_growth_factor-like_EGF|PF12661.5	XP_973718.1	246.9	350
TRINITY_DN11875_c0_g1_i1	type:internal	300	ATATATGTGCAGCTTTTAAATGTTTTACCAGTTCAAGAAGTGGCCAAAATTGTAAAGTTGACAATTGATTGTTTACCTCCTGAGCCAAATGTAGCATTAGTTCAAGCAAAATTGCGTTGTATTCATGACACCGTAAAAAGTGAAATATTTCAAAACATTGATTCCAGAGTGGAGCTATTTGAAGTCTTTACAAGGCACTTAAAGAAACACATGTTACAGCAACAAGAATTGACCATGTGTGCCACTGTTCTTGGCGACATGCTAACTTATTTGCATCATGAACATACAAAGAGTACCCAG	IYVQLLNVLPVQEVAKIVKLTIDCLPPEPNVALVQAKLRCIHDTVKSEIFQNIDSRVELFEVFTRHLKKHMLQQQELTMCATVLGDMLTYLHHEHTKSTQ	NA	NA	NA	130
TRINITY_DN1187_c0_g1_i1	type:3prime_partial	888	ATGACGGAACTACGAAATTTTGACAGAATCGAGAAAGTAGGCGAGGGAACTTATGGTGTGGTATATAAAGCAGAAGATAAAAGTAATAAAAGACTTGTTGCTTTGAAGAAAATTCGACTAAAATGTGAAACGGAAGGAGTCCCAAGTACAGCTCTTAGGGAAATCAGCTTGCTGAAAGATTTAGACCATCCAAATGTTGTCTGTCTGGAAGATGTTGTGTATTCGGATCAGAAATTGTATCTTGTATTCGAATATTTAGATTTGGATTTAAAAAAGCAGCTTGATCAACTCCAAAACACTGGACTTCCGCTTAGGACTGCCAAGAGTTATCTTTACCAGTTGTTACGAGGCTTAGCTTACTGTCACTCTCGGAAAATTTTGCATCGTGATCTGAAGCCT…	MTELRNFDRIEKVGEGTYGVVYKAEDKSNKRLVALKKIRLKCETEGVPSTALREISLLKDLDHPNVVCLEDVVYSDQKLYLVFEYLDLDLKKQLDQLQNTGLPLRTAKSYLYQLLRGLAYCHSRKILHRDLKPQNLLVDKEGNIKLADFGLARAFQLPIKAYTHEIVTLWYRAPEILLGTKEYSTSVDIWSIGCIFAEMLTKRPLFPGDSEIDQLFRVFRTMGTPDESTWPGCTSLMDYKPTFPRWLPKDIASTLPMLDLDGIDLLLKLLTYAPNKRISAKNALCHPFFKDVTIPS	Protein_tyrosine_kinase|PF07714.15;Seadornavirus_VP7|PF07387.9;Protein_kinase_domain|PF00069.23;Phosphotransferase_enzyme_family|PF01636.21;Kinase-like|PF14531.4;Lipopolysaccharide_kinase_(Kdo/WaaP)_family|PF06293.12	NP_998571.1	426	402
TRINITY_DN11880_c0_g1_i1	type:5prime_partial	315	TTTAATTTTTTGTCTCCTATTCTACCTCCGAATGATTGCATTTTAACTCGGAGATTAATAGAATATTACCATAGGAAAAACTGCCATGCAGGGACGCAAATGCTTGTCTCGATCCTTAGAGAAAAATTTTGGATTTTGAGGGTAAGGAGGACAGTCAGAAATATCATTCAAAATTGTGTAAAATGTAAAAGATACAACGCGGGACCAGTTAAAAGTGAATCTGTATCTTTACCGGCTGATAGGGTAAGGGATGCTGGTGTGTTTGAAGTGATAGGTATTGATCTTGCCGGACCTCTCTTCCTCAAAAATGGTTAA	FNFLSPILPPNDCILTRRLIEYYHRKNCHAGTQMLVSILREKFWILRVRRTVRNIIQNCVKCKRYNAGPVKSESVSLPADRVRDAGVFEVIGIDLAGPLFLKNG*	Zinc-finger_like,_probable_DNA-binding|PF16721.3;His(2)-Cys(2)_zinc_finger|PF09337.8	XP_001899068.1	62.4	110
TRINITY_DN11883_c0_g1_i1	type:5prime_partial	564	TCAGATGAAAAACCAGCCGTCTCGACAGGCTTTGATAAAGATACTTCCAGGTACAGTACGCCAGAAGTGAACGAATTTCCCAAGCCAGATGCTTTCAGGGATTCTTACAAACCCGAGACGGTTTCTTCTTATTCTGCGGGTCAACAAGGGTTCACTTCAGGTGATAAATCGCAGTCCGGTCGGTTCCAGAACGTTCCCGACTTCAAAGGTCCTCAAATATCCTTCAAGATGGGTTCAACAGCAACTTCTTCTGCCTCCGATGCCGCAGGGTTTTCGGGAAAAATATTGTCCCGACCGTTCTACGGTGGCTATGCTTCAGGGGGTCAAGTAAAGACCCAGTTCTTGGGGATGAGACCTTCAGTGCTCTACGCCGAGGAACCCAGCTACTTCTCGGGAACT…	SDEKPAVSTGFDKDTSRYSTPEVNEFPKPDAFRDSYKPETVSSYSAGQQGFTSGDKSQSGRFQNVPDFKGPQISFKMGSTATSSASDAAGFSGKILSRPFYGGYASGGQVKTQFLGMRPSVLYAEEPSYFSGTPAVSLRNKIFYLTDDSVAGAYDYSSPSLLYSGNEGAVLLDAAHDSDAYVLVKKK*	NA	NA	NA	321
TRINITY_DN11900_c0_g1_i1	type:5prime_partial	381	GCTCTTCCGATCTCCTCACCTAATCACCACAGCTCAAATTCTGTTGTAAACATATCCCCTGTTCCAGCTCACTCCATGTCACAAATTGAAAAAGTTTCATCTGCTTACAGTCGTAGTCATAGTCCATTACCTCTTCGTGCAAGTCCATCCCATTTATCACTTAGTCACACTCCAAAAACATCAAACACATATTCTCATTTGGGACAAACTTCATATACGACACACCAGTCCAGTCACACTGTGTCATCTACTCTTCATCAACCGACTCTTGTGCGTAGTAATGCTTTTGATTCTTCATTACCCATAACTACATCTAGTTCTCCAACAAGCACCTTTACAATAAATCAAGAAATGAAAACTGTGAATCCAAGAACTAATTAA	ALPISSPNHHSSNSVVNISPVPAHSMSQIEKVSSAYSRSHSPLPLRASPSHLSLSHTPKTSNTYSHLGQTSYTTHQSSHTVSSTLHQPTLVRSNAFDSSLPITTSSSPTSTFTINQEMKTVNPRTN*	NA	NA	NA	174
TRINITY_DN11908_c0_g1_i1	type:5prime_partial	435	CAACATGCATCAAAGCTGGAGACTTCTCAAACTATGAATCAGACAGATACCATGCATAAAGTCTTGTCAGTCGTGATGGACGAAAATGTGTATCTGAAAAATCGCCTGTGTAGTACTCATGATAAACTGGAGGAAATACTAAAACTTTCTGAAAACATTAATACCGAAATAATGAATTTCTCGCAGAGAATATCTAAAATGATAACTGTGAACAATGAAATGACCAATTTGCAATGTAAACTTGAACGTGAGCGAGAACTATTGAGAAATGTAGAAGCTGAACGAGATAACATGAAAGAGAAACTTCTAATCTTAGAAAGTTTGATAAAAGAGGAGGAAGAATTCTTAGGGTCATCGGATTCTGCTATTGGGGATGCATCTTTCTTGTTTACTGATGAT…	QHASKLETSQTMNQTDTMHKVLSVVMDENVYLKNRLCSTHDKLEEILKLSENINTEIMNFSQRISKMITVNNEMTNLQCKLERERELLRNVEAERDNMKEKLLILESLIKEEEEFLGSSDSAIGDASFLFTDDDQTDQGDESSV*	GIT_coiled-coil_Rho_guanine_nucleotide_exchange_factor|PF16559.3;Testis-expressed_sequence_13_protein_family|PF15186.4;Snapin/Pallidin|PF14712.4;Protein_of_unknown_function_(DUF1664)|PF07889.10;B-cell_receptor-associated_protein_31-like|PF05529.10;FAM76_protein|PF16046.3;Site-specific_recombinase|PF10136.7;Growth-arrest_specific_micro-tubule_binding|PF13851.4;Cortexillin_I,_coiled_coil|PF09304.8	NA	NA	60
TRINITY_DN11921_c0_g1_i1	type:internal	327	CCTACCTATAAAATAAAGAAATTGAGTGAGGAAAGTATAAATATATTAATTAATGAGCTTTTGAGCAATTATATAAATGATGCCATTGCTTCCATCATTAACATTTCTAATACCCATAAAAATGAATTAAATGGCCATATATTGGCAAACAAATCTATTGAAAGTAGTGAATCAGTTGCTATAAATAGTGTTTCTTCAGTAACTAATATTCAATCTGAAATTGAAAATGAACATAAAGATGCTCAATCCTTATCTACATTACAAGATAAAAGTGAATGCAATATATTTAAGAAACAACCAGATTGGTTTGAAGATGGCTTTGTTCCT	PTYKIKKLSEESINILINELLSNYINDAIASIINISNTHKNELNGHILANKSIESSESVAINSVSSVTNIQSEIENEHKDAQSLSTLQDKSECNIFKKQPDWFEDGFVP	NA	NA	NA	192
TRINITY_DN11923_c0_g1_i1	type:internal	915	TTAGTAAGCATTCTATTGGGACTAGAGAAAAACAAATTTTTATTGACTTTAAATTTAAAAGGCAACAATATCAGGAGTTCTGGCACTGAAGTCTTGGGAAAGTTTCTTCGACATAATAGCTATCTTCAAAACTTATGCTTAGAATGGAATGGCCTTGGAATTTTTCCGGAGAAATTCTACCTGTTTTGTGAATCACTTTGCCTAAATAATTCTTTAAAATTCTTAGATTTAAGAAATAATCAATTGAATCATGTTTGTGCCCAAGCTATATCTGATGTAATACTGAGAAATTCATCATTACAAAAACTTGACTTACGCTGGAACAACATTGGATTGATTGGAGGACGAACAATTTTGAAATCTTTGCCCAGAAACAAAACAATTATTTCACTTGAAATA…	LVSILLGLEKNKFLLTLNLKGNNIRSSGTEVLGKFLRHNSYLQNLCLEWNGLGIFPEKFYLFCESLCLNNSLKFLDLRNNQLNHVCAQAISDVILRNSSLQKLDLRWNNIGLIGGRTILKSLPRNKTIISLEISGNDLPSDIIEAIDIAISASAQRYIANNEYIARSKFLSSKLKEKEEERNIQVKSLMEQLEKMDKDASMNERWHVQKLVEAEEALSEKSKICESLTAKIRELEVKLLSLSEINNNLALNLNAKEIKNKELREELESALDKEKKDKQEVKRNLLESLGSLREENLFLKERIKQQ	Plant_protein_of_unknown_function_(DUF641)|PF04859.10;Leucine_Rich_Repeat|PF00560.31;LMBR1-like_membrane_protein|PF04791.14;Leucine_Rich_repeat|PF13516.4;Leucine_rich_repeat|PF13855.4;Avirulence_protein_ATR13,_RxLR_effector|PF16829.3	NP_001121043.1	194.1	436
TRINITY_DN11927_c0_g1_i1	type:internal	330	TTGTTCAGCTCTGCACGCTTTCGCCACATTACTCACCAACCCGTACTTGCCCTGGAAACCAGGTACTCATTTTCAGGGTTGGAGCACCTTCGAAATTCCAAATCCACTGCAAACGATTTCAAAACACAATTACATTTAACATATATTTTCTCAGTTGTTCAGCTCTGCACGCTTTCGCCACATTACTCACCAACCCGTACTTGCCCTGGAAACCAGGTACTCATTTTCAGGGTTGGAGCACCTTCGAAATTCCAAATCCACTGCAAACGATTTCAAAACACAATTACATTTAACATATATTTTCTCAGTTGTTCAGCTCTGCACGCTTTC	LFSSARFRHITHQPVLALETRYSFSGLEHLRNSKSTANDFKTQLHLTYIFSVVQLCTLSPHYSPTRTCPGNQVLIFRVGAPSKFQIHCKRFQNTITFNIYFLSCSALHAF	NA	NA	NA	105
TRINITY_DN11930_c0_g1_i1	type:5prime_partial	705	AAAATAATGAGAGGTCAGTCAATTTTAGATGCTGAAATATCAATGATGCAGTGTGTGAAAGATGATGTTGAAATTCTGAATCTCATTTCCATCGTTTTAATAATTTTTGTAGTGTTATTCATTTCAATCCTAATTTATTTTTGCTATTTATTTAGGCGGTATGTCGGATATTGGGTTTTCCATTTTAGGGTAAAAGTTAAGGAAAAAGTCAGTCGGGATGCTGAAAATGGGCAGAATTACATATATGATGCTTTTGTATCCTATAACTCATGTGACAATCCCTGGATTGTTAAACATCTTATTCCAGCATTAGAAAATGAGGATCCCAAGTATAGACTTTGTGTTCATGAGCGTGATTTTCAGATTGGAAGATTAATAACTGAGAATATTTTAGAAGCA…	KIMRGQSILDAEISMMQCVKDDVEILNLISIVLIIFVVLFISILIYFCYLFRRYVGYWVFHFRVKVKEKVSRDAENGQNYIYDAFVSYNSCDNPWIVKHLIPALENEDPKYRLCVHERDFQIGRLITENILEAIENSRNVILILTEDFIKSEWCMFELHMAQHRLFDDTRDCLILVKFHDINKKLYTKNLRYLEKTRTCLTWTEDETGQNLFWEKMKRVLGAPIKAVPDKEIDI*	Bunyavirus_glycoprotein_G2|PF03563.11;TIR_domain|PF13676.4;TIR_domain|PF01582.18;Domain_of_unknown_function_(DUF3377)|PF11857.6	XP_551799.2	17.7	244
TRINITY_DN11935_c0_g1_i1	type:5prime_partial	855	AATGTCATACTACCCCTTTCCGGAAGAATCGATACATTTCGAAATTTCATGGACAAATTCGTTAAAGTAGGCATACGGCACGACAAGCGCATTTTTTTAACTGTAGTATATTTTGGTTTGGAAGGACTACTTGATGTGCAACAGATTCTGACCAAAGTATCAAGAGACACAAAATTCCGAAATTTTAAACTTCTGACTTTAAATGATACTTTCTCCAGAGGTAAAGGACTTCAAGTCGGTGTGCAACACTGGACCAAAGGAGATGTGTTGCTATTCATGTGCGACGTGGACGTCATATTTTCGACGAAGTTTCTAGAACGATGTCGGCTGAATGCAGAACCTGGTAAAAAAGTGTATTATCCAATCGTTTTTAGTCTTTTTAATCCTTCAATTGTATAT…	NVILPLSGRIDTFRNFMDKFVKVGIRHDKRIFLTVVYFGLEGLLDVQQILTKVSRDTKFRNFKLLTLNDTFSRGKGLQVGVQHWTKGDVLLFMCDVDVIFSTKFLERCRLNAEPGKKVYYPIVFSLFNPSIVYSLQGKETPSESEQLLISRDTGFWRDFGYGMTCQYRSDFLKLKGFDEDIVGWGGEDVMLYRKYVRSKLMVIRSTDPGIFHLWHEKKCDSQTLSMDQQRACLRSRALSEASHAQLGLLAFREELKKREEKSASSSQDSAVTNSATGHIGENNV*	Glycosyltransferase_like_family_2|PF10111.7;N-terminal_domain_of_galactosyltransferase|PF02709.12;Chondroitin_N-acetylgalactosaminyltransferase|PF05679.14	XP_001663758.1	366.3	573
TRINITY_DN11940_c0_g1_i1	type:internal	543	CTGCCAAACATTGAGAAAAACAAAGCAGGTGATGAAGAATTATCAAACCTTGGACAAGGAGAAAATGAGTCAAAAATCAATATTGAAAAAAAATATTTGGAAACATGTCCAAAATGTAATGAAAATTTTTACGATGCAAGAACGTTTCATAACCACATAAAGAAATACAACAAAGATGGAGATTTCATTTGTGGACTTTGTGGACGTAAACTTTGCTCCGCTAGTTCAAGGGATCGTCACATGGTTATCCATTCAAAGCTTAGACCTTTCACTTGCAAGATATGCAAGCGACAGTTTACTACTAATGGGAACATGAATCGCCATATACAGAAGCACCACGGAAACGGCAAACAAAAGGTCGTCAAAACTAAGAGGAAAAAACAAAAAGATGAAAAACAG…	LPNIEKNKAGDEELSNLGQGENESKINIEKKYLETCPKCNENFYDARTFHNHIKKYNKDGDFICGLCGRKLCSASSRDRHMVIHSKLRPFTCKICKRQFTTNGNMNRHIQKHHGNGKQKVVKTKRKKQKDEKQSKAKKKFLGALELMLRKDTTDPFKKLKEEEEQLDSWFQLIEASALSSV	Double_zinc_ribbon|PF12773.5;Sgf11_(transcriptional_regulation_protein)|PF08209.9;Zinc-finger_double_domain|PF13465.4;C2H2-type_zinc-finger_domain|PF13909.4;Protein_of_unknown_function_(DUF629)|PF04780.10;C2H2-type_zinc_finger|PF13894.4;zinc-finger_C2H2-type|PF16622.3;C2H2_type_zinc-finger_(1_copy)|PF16293.3;Drought_induced_19_protein_(Di19),_zinc-binding|PF05605.10;Zinc-binding_domain|PF17180.2;…	AAH80680.1	78.2	276
TRINITY_DN11946_c0_g2_i1	type:complete	654	ATGGAATCCTCCGATATTCTACCATATCAAAAAACTGATGAAACAGTTTTAGAAGGTGAAATAGGTGGTACTCCTACGAGCACCGAGGGTTCAGAATATCATACATTGGATGAGCCCGTCAAAGATACGATACTTCGTGATTTAAAAGCTGTTGGAAACAAATTTTATCATGTTTTGTATCCAAAACAGAAGAAAGCTCTTTTGAAGGACTGGGATTTGTGGGGACCTTTAATACTATGTGTATTCCTTGCATCTACGTTACAAAATGAGAGCGCCGATAATATAAATGAAGGTGGACTGCAGTTTGCTGAAATATTTTTCATCGTATGGTTTGGTGCAGTTGTCGTCACTATAAATTCTAAGCTACTAGGAGGAAACATATCTTTTTTCCAAAGTGTA…	MESSDILPYQKTDETVLEGEIGGTPTSTEGSEYHTLDEPVKDTILRDLKAVGNKFYHVLYPKQKKALLKDWDLWGPLILCVFLASTLQNESADNINEGGLQFAEIFFIVWFGAVVVTINSKLLGGNISFFQSVCVLGYCLLAPSIALLVCLFFDLIFNNSLLLFILKFLIVTGGFVWAIIGATVFLGDSQLPKRKALVVYPMFLFYFVVSWMILLKS*	Yip1_domain|PF04893.15	NP_001040374.1	248.8	9149
TRINITY_DN11963_c1_g1_i1	type:internal	690	GAAGGATATGAGTATCAAGCTTTTAATAGAATAAATATGGAGAATGAATTTGATGCCAAACCTTTACTTTTGAAAATACCATGGGTTGATGTCCTTTTCTGTCATGTCTTTTCTAAATTAAGTCTCCAGGATTTGTTTAACCTGAGGGCAGTGAACAAAGAAATTAAATTCCTGGTTTCAGAATATTTCAAAGTGAACCGTATTCTGAATTTTTCTTCTGTTACTCGTTCTGCAACCCTGAAAGCATTTCAGATTATTACCAAAGATGCACACAATTTGAGAATAATTGATCTCAGTTGTTGCAAATGGCTGGATAGTATTGCACTAAATCCTGTCTTGGAGTCCAACAAAAATCTGCTTCATTTAAATATCAGCAGTTGTATTTCAGTGTCAAACAGT…	EGYEYQAFNRINMENEFDAKPLLLKIPWVDVLFCHVFSKLSLQDLFNLRAVNKEIKFLVSEYFKVNRILNFSSVTRSATLKAFQIITKDAHNLRIIDLSCCKWLDSIALNPVLESNKNLLHLNISSCISVSNSGLQILANNASELKVLDLSNCHWTSAGAIISIALNCPMLEFIDLTSCWEVTDEAVCELVLNCPRLKNLSVSRIYGITDKSLVVIAHKLHSLERLNLTG	F-box_domain|PF00646.31;Leucine_Rich_Repeat|PF00560.31;Leucine_Rich_repeats_(2_copies)|PF12799.5;Leucine_Rich_repeat|PF13516.4;F-box-like|PF12937.5	XP_001662257.1	136	618
TRINITY_DN11964_c0_g1_i1	type:internal	1071	GAAGTCTTGAAATATGAACAGAAACATGGAGGACTTGTTCTTGACTGCAGTGTAAGTCCTGCACCTGGAAGTGTTGCTGCTGCTGCTCAAGGGAAGGATGGAACTTTTTATTTTCCAACGCAGCATTTACACACTACATCTCCAGAGTATAATATTATACTTACAAAGAAATCTCATTTAGTTATTCGCATGTTAGAAGACAGAATTGGAAGAGAATTACTTTTACAAGTATTCAACAAATTATTATCGTTAGCTTCTAGTGCTGCACAACAAAAAGTCACCAGTAATGTGTGGTTCAATATGTTACTTTCTACTAATAGTTTTCAAAAAGCTATATTTACTGTTACTGGAAAAGATATAAATACATTTTTGGAACAGTGGGTTAGACAAGGTGGTCAT…	EVLKYEQKHGGLVLDCSVSPAPGSVAAAAQGKDGTFYFPTQHLHTTSPEYNIILTKKSHLVIRMLEDRIGRELLLQVFNKLLSLASSAAQQKVTSNVWFNMLLSTNSFQKAIFTVTGKDINTFLEQWVRQGGHPKFTATFVFNRKRNTVELEIKQLDVQNRGIRRYVGPLTITIQELDGTFKHNLQIEENATKHDITCHSKSRRNKKKKIPLCTGEEVDMDLSAMDADSPVLWIRIDPDMLLLRQVVIEQPDYQWQYQLRYERDVTAQKEAIEALEKFPTPASRSALTYTIENEHCFYKIRCIACFCLQKVANAMVATWAGPPAMMSIFRKLFGSHACMHIIRLNNFKNLQYYFLLK	F-box_associated|PF07735.15	XP_315746.3	488	440
TRINITY_DN11975_c0_g1_i1	type:5prime_partial	363	AATTTAAAATTGACAATACCTGAAGCACAAAATGAAACAGTGGTTAGTTCTGTTCAGACAAATACCACAGAAGCAGTAGCTACCACAGAACATTTAAAGCCTCAACAGCCAATTCAGAAACCATCATTGGGACCTGTGAAAGATAAACAGCCTCAAAAAGCGATTGTGAAACCACAAGTACTGACTCATGTTATTGAAGGTCTGGTGATTCAAGAGGGTTCTGAGCCGTTTCCGGTCAGTAGATCAGCCTTATTAGATTCACCATGTCGAATTTTGCCTCCTGAAAAACTTGATTCTCCCATCAAAAGAAAAGATCCACCAACAGGTATAACAATTCATTATTTTGTTTTTATTCATCAATAA	NLKLTIPEAQNETVVSSVQTNTTEAVATTEHLKPQQPIQKPSLGPVKDKQPQKAIVKPQVLTHVIEGLVIQEGSEPFPVSRSALLDSPCRILPPEKLDSPIKRKDPPTGITIHYFVFIHQ*	Potyvirus_P1_protease|PF01577.14;Minor_capsid_protein_VI|PF02993.12;Bacterial_shufflon_protein,_N-terminal_constant_region|PF04917.10	AAH73964.1	65.1	178
TRINITY_DN11989_c0_g1_i1	type:internal	747	CTTGCTAGTGTTTTTCATGAGGAGCTTTTACCAGTTTTGTTGCCAATCTTGAGAGAAACACTTTTCCATCAAGATTGGGAAATAAAAGAATCTGGAATATTGGCTCTTGGTGCTATAGCCGAAGGTTGTATGACTGGAATGATACCCCATTTACCTGAATTAATACCATACCTAATTTCTTGTTTATCCGATAAAAAAGCTTTGGTTCGTTCAATAACATGTTGGACTTTAAGCCGATACTCGCATTGGGTTGTTGGCCAACCACATGGTTCCTATTTAAAACCTTTGATGACAGAGTTATTGAAACGAGTCTTGGATGCAAATAAGCGAGTTCAAGAAGCCGCTTGCAGCGCATTTGCAACCCTTGAAGAAGAAGCATGCACAGAATTGGTGCCCTAC…	LASVFHEELLPVLLPILRETLFHQDWEIKESGILALGAIAEGCMTGMIPHLPELIPYLISCLSDKKALVRSITCWTLSRYSHWVVGQPHGSYLKPLMTELLKRVLDANKRVQEAACSAFATLEEEACTELVPYLAFILETLVFAFSKYQHKNLLILYDAIGTLADSVGHHLNKQEYISLLMPPLIEKWNYLKDDDKDLFPLLECLSSVATALQSGFLPYCEPVFRRCLSLVEQTLNQTMANVSNPEQFE	non-SMC_mitotic_condensation_complex_subunit_1|PF12717.5;Vacuolar_14_Fab1-binding_region|PF12755.5;HEAT-like_repeat|PF13513.4;RNAPII_transcription_regulator_C-terminal|PF12460.6;CLASP_N_terminal|PF12348.6;HEAT_repeats|PF13646.4;Armadillo/beta-catenin-like_repeat|PF00514.21;HEAT_repeat|PF02985.20;Adaptin_N_terminal_region|PF01602.18	XP_001652811.1	450.3	396
TRINITY_DN11992_c0_g1_i1	type:internal	780	CTTATGGGAGATTACTCATACTTAAAAGATCGCTGGTGCCAATTTGATGCAACTATGGTTTTTTTCCTATGGATATCTGTTATTCTACAGATTTTTGAAATGGTTCAAGTTGTGCCAAAATTTTCTTATTTATCAATACTGAGAGCACCTCGTCCATTAATCATGATTCGTTTCATTCGAGTGTTTTTAAAGTTTTCAATGCCAAAATCAAGAATTAACCAAATTTTTAAGCGTTCAAGTCAACAGATATATAATGTTACTTTATTTTTCCTATTCTTTATGTCCCTTTATGGTCTTTTGGGTGTGCAATTTTTTGGGGAAATGTCTAATCATTGTGTTGTGAATGGTACTGATCCAAATAATGTAACTCTTGATGATCTTGCTATACCTGATACTTAT…	LMGDYSYLKDRWCQFDATMVFFLWISVILQIFEMVQVVPKFSYLSILRAPRPLIMIRFIRVFLKFSMPKSRINQIFKRSSQQIYNVTLFFLFFMSLYGLLGVQFFGEMSNHCVVNGTDPNNVTLDDLAIPDTYCSNIPDAGYHCPEGMVCMELELPKSISGFNGFDDFAHSFFTVYQAASQEGWALLMYKAMDSLPAWRAICYFTTLIFFLAWLVKNVFIAVITETFNEIRVQFQQGWGERGTIQTQSTAQVLKGDDSGW	Polycystin_cation_channel|PF08016.10;Ion_transport_protein|PF00520.29	XP_001652236.1	409.8	360
TRINITY_DN11999_c0_g1_i1	type:internal	354	CAAAATTGTGGCGTTCAGCTGAATAGTTTAGATTACATGAGTTGCAATCCACCTCCTTGTCTCTCCATGGTATTCTCATACCAAGCAATGAATTCCAAAATGGAGGAGTGTGAACTTTACATTCTGAAGAAAGAATCTTTTGAATTGAAACTCCAGAATGAGAAAGATCTCTCTGAAGAGAAGTTTTATTTAGAACAGCAAGTACTTGTTACTCAAGAAATTTTAGCTGAGCAGATTACAAAAAGGTGGAATAATAGGAATATATGTCAGTCAACTTTTCCATATTTATGTAATGCAAAAGAAGGGATAAATTTAAAGAAATGCAAGTCCTTACCAAATCTGGTTCAGATAAAC	QNCGVQLNSLDYMSCNPPPCLSMVFSYQAMNSKMEECELYILKKESFELKLQNEKDLSEEKFYLEQQVLVTQEILAEQITKRWNNRNICQSTFPYLCNAKEGINLKKCKSLPNLVQIN	NA	NA	NA	44
TRINITY_DN12000_c0_g1_i1	type:internal	321	GTTATGCCAGCAACACAAGTATCTTCAGCTTCTGGTTCATCTGGGTCACAAGATTCTACAAGGCAACAACAATTAGCTTTGACAGCTGGCAGTAGTTCATACAACATGGCTCTCATTCCTACTTCAGAAGGTCTGACAACCGTGCGGCCTAAATGTATGAAATTGAAACAAGTTCCGGGACGCCATAGAATGTTGCTGTCAGATAAAGGTCTTCCTTTAGCAATTGGTTCCTCTGAATCAGACAGCTGTTCTGGAGAGCAGAGGTACCATTCTTTTAGCAATAAAAGAACAATTGATGTGCATGAAAGTATATTATCCCTC	VMPATQVSSASGSSGSQDSTRQQQLALTAGSSSYNMALIPTSEGLTTVRPKCMKLKQVPGRHRMLLSDKGLPLAIGSSESDSCSGEQRYHSFSNKRTIDVHESILSL	NA	NA	NA	62
TRINITY_DN12009_c0_g2_i1	type:3prime_partial	828	ATGAAATCAGTAAAAGAAGAAAAAGGATTGCAAGAAAGTTCTACCAAGTGGGAAGTTAAAATTCAACCTTCTGCTTCTCATAATAAAACTCCAATTTCAGATAACGATGACAGTTGTTCTTCGATTTCATCTGAAACGAATACACCTACGAGAAATGAGTGTCGTAAGTCTCCTATAATGGGACCTGACAGTAAGGATTCTTCTAATCTTCAAGACATGGAACAGCTTTCTATGAAAAGTCATGAAAGTAACTGGAAAACATCAAAGGAAACACCATTAACTCTCTCTGATGATCCTGAACCTGAACTCTTGCGAGTTTTTGCAAGACGTTCTATTAAACAAAAGAACTGTGATAAAAATAAAGTGGATGAGCCTCATGAAAGTTCCATGTCGGATGCA…	MKSVKEEKGLQESSTKWEVKIQPSASHNKTPISDNDDSCSSISSETNTPTRNECRKSPIMGPDSKDSSNLQDMEQLSMKSHESNWKTSKETPLTLSDDPEPELLRVFARRSIKQKNCDKNKVDEPHESSMSDASLDDSSTPIDKPQENNEISVSDNSTVIKISEISKPHIKTHDLKKKSKSFCEKEKVTTRSVSPLKEINLIHRESPVKLTSDSSVSSETVHPRQRLASVPDIPLSLPPDSIKNSLKESSTENSAAVSIKEETQQRISSTSVPVTT	homogentisate_1,2-dioxygenase|PF04209.11	NA	NA	271
TRINITY_DN12011_c0_g1_i1	type:internal	444	TTCATCAGTAAAGATCTTGATACAAATCAAAATTCTAAAGGAAATTCGGATAAGAAAAGGAGTTCTGATTTTGCAGAAGAACCTGAAAAGAAGAAGACTAAGCATTCCAGGAACAGATCAAAATCTTTGAAAAGTATCATCGATGCTGTGATTCCGCCTGAAAAAGCAAATCCTCAAATTCCTATTGTTCGAATTAAGAGAAAATTCAACCATGATAGGTCTTGTAGCTCTCATTCTGTAGAGGAAGTTTCTGTGGATGCACCCAAAGACTATGAAACAGTCATCAGCAATAATGACCCTGAACCAGTGCCAGATCCTGTAAAGGCTACAGAAGGAGAAATTATACTTAATTCAAACCCTAGTCCTCCTATTAGGAATGTCTCTACTGATAAAAATGAA…	FISKDLDTNQNSKGNSDKKRSSDFAEEPEKKKTKHSRNRSKSLKSIIDAVIPPEKANPQIPIVRIKRKFNHDRSCSSHSVEEVSVDAPKDYETVISNNDPEPVPDPVKATEGEIILNSNPSPPIRNVSTDKNESLPLLNETEIKTEEP	Core_histone_H2A/H2B/H3/H4|PF00125.22	NA	NA	182
TRINITY_DN12017_c0_g1_i1	type:5prime_partial	462	GTGCTCTTCCGATCTCCTGCGCTTTGGTTTGTGCGATTAGAGGACCAGTTCGATTTAGCCAAAGTTTTAAACGATACCACTAAATTTAATTATGTTCTGTCTGTTTTTGAGTCAGACATTTTAAATTCTGTTAGCGACTTGGTTCTAAAACCACCTGAAAACAGAAAGTACAAAGCCTTAAAAAAGCGTTTAATCGAAGTGCATTCAGAAAGTGAGGATTCTAAAATTCGAACTCTCCTCCAGGGCTTAGAATTAAGGGACCAACGGCCATCACAGCTCCTTATGCGCATGCGTTCCCTCGCCGGCGATAATGTTGGCGAGCCACTCTTGAAATCGCTGCGGCTCGGACGTTTGCCTAACGGAACGCAAACAATTCTTGCTGCTCTCAACGAAAACTTA…	VLFRSPALWFVRLEDQFDLAKVLNDTTKFNYVLSVFESDILNSVSDLVLKPPENRKYKALKKRLIEVHSESEDSKIRTLLQGLELRDQRPSQLLMRMRSLAGDNVGEPLLKSLRLGRLPNGTQTILAALNENLDQLATVADKINYLTFSQGIN*	NA	NA	NA	122
TRINITY_DN12025_c0_g1_i1	type:3prime_partial	471	ATGAAAATGACTGACAAAAGCTATGAAAAAGCAGTTGACATTCCATCTAGAGTAAAGTTCCGTGGTTTATTGTTAACTGCTTCTAGTCTTTCTGGACTTTCTTTTCTACTCACGATCAATAAATCTTTCCTTAGTTGGATAACAGACTGGCTTCGATGGTGTCCTACCTCACCTGAGTTGCTGGAGCAGGCAGAAACCAAATTGTTCTCATATCTCAAAAAAACTCCTGAAGTTTCTTTTGTCCCAATAAATTCAGATAATCAAACAGAAGAATATAAGATAAGATCTTTGATTGCTAATAAAGATACAGATGGGAAAGCCACTCCTCTTTTACTTCTCCATGGTTTTGCATCAGGAATTGGCCTTTGGATATCAAATATTGACAGTTTATCTCAAAAT…	MKMTDKSYEKAVDIPSRVKFRGLLLTASSLSGLSFLLTINKSFLSWITDWLRWCPTSPELLEQAETKLFSYLKKTPEVSFVPINSDNQTEEYKIRSLIANKDTDGKATPLLLLHGFASGIGLWISNIDSLSQNRPVYALDILGFGLSSRPAFSKDAE	alpha/beta_hydrolase_fold|PF00561.18;Alpha/beta_hydrolase_family|PF12697.5	AAI27471.1	74.7	288
TRINITY_DN12025_c0_g2_i1	type:3prime_partial	393	ATGAAAATGACTGACAAAAGCTATGAAAAAGCAGTTGACATTCCATCTAGAGTAAATTGGATAACAGACTGGCTTCGATGGTGTCCTACCTCACCTGAGTTGCTGGAGCAGGCAGAAACCAAATTGTTCTCATATCTCAAAAAAACTCCTGAAGTTTCTTTTGTCCCAATAAATTCAGATAATCAAACAGAAGAATATAAGATAAGATCTTTGATTGCTAATAAAGATACAGATGGGAAAGCCACTCCTCTTTTACTTCTCCATGGTTTTGCATCAGGAATTGGCCTTTGGATATCAAATATTGACAGTTTATCTCAAAATCGGCCTGTGTATGCATTAGATATTTTAGGATTTGGACTTAGTTCTCGTCCTGCCTTTAGCAAAGATGCAGAG	MKMTDKSYEKAVDIPSRVNWITDWLRWCPTSPELLEQAETKLFSYLKKTPEVSFVPINSDNQTEEYKIRSLIANKDTDGKATPLLLLHGFASGIGLWISNIDSLSQNRPVYALDILGFGLSSRPAFSKDAE	alpha/beta_hydrolase_fold|PF00561.18;Alpha/beta_hydrolase_family|PF12697.5	AAI27471.1	74.7	116
TRINITY_DN12027_c0_g1_i1	type:internal	720	ATAATCCACAGAGATTTAAAAATAGAAAATTTACTTTTAAGTTCTGATGGCAAAATAAAATTATGTGATTTTGGAAGTGCTACTACTAAAGCCTGCCATCCTGATAATACATGGAGTGCTATTCAAAGAAGTTTAGTGGAAGATGAGATGTGTAAAAATACAACACCAATGTACAGACCTCCTGAAATTTTGGACACTTATAATAATTATCCTATCAATCATGCAATGGATGTATGGGCTTTGGGGTGTATCTTGTTTGTTCTTTGCTTTAAAGAGCATCCATTTGAAGATTCTGCCAAACTTCGAATTTTAAATGCTAAGTATACTATTCCAGCTCATATAACAGATTATGAAGTTTTGCATCATTTAGTTAGGTCAACACTACAATTAAATCCTGTT…	IIHRDLKIENLLLSSDGKIKLCDFGSATTKACHPDNTWSAIQRSLVEDEMCKNTTPMYRPPEILDTYNNYPINHAMDVWALGCILFVLCFKEHPFEDSAKLRILNAKYTIPAHITDYEVLHHLVRSTLQLNPVDRPSVNDILKQLKEIADARHTNVNAALNLGQPVGSNPSSPAHIPSRPPPPNVESTTSSGTPPPPRPPPPSSVNSDSAYAQANNMAGGPGLFGSLKGGAGSFLKNLKR	Protein_tyrosine_kinase|PF07714.15;Adenylate_cyclase_associated_(CAP)_N_terminal|PF01213.17;Protein_kinase_domain|PF00069.23;Kinase-like|PF14531.4	AAH85005.1	214.9	282
TRINITY_DN12029_c0_g1_i1	type:internal	432	TTGACTCGTTGCCATGTGCTATGGAAACATGTTGATGCACATGATATGCAGCTAACATCATACCAGGTTCAAAAGTTAGTTCCAATTCTTCCATCCTGTGTTATGTATTTGAGAATCTGTAGTCTTTCCACTCAACAAAGAATTCCTTTCCTCACTCCTCACACAGCTATTGAAATACGAGAACGTTGTCCTCAACTAAGAACATTAATTATTGAGAGTGCATTCATTGCAAAACATATTAATTTTACAGATATTACTGTAGAAGATTTACCTCAGAAACTATCTGTACTTTCATTACGTAAGTCTTTCTTTCATACTGATCAGTTCTTTTGTAGTGTGAGTCATCCTACAGTTCCAAAAATCAAAGTGTTAGACTGCAGTTCTTGTTGGTGTGTGTGT…	LTRCHVLWKHVDAHDMQLTSYQVQKLVPILPSCVMYLRICSLSTQQRIPFLTPHTAIEIRERCPQLRTLIIESAFIAKHINFTDITVEDLPQKLSVLSLRKSFFHTDQFFCSVSHPTVPKIKVLDCSSCWCVCDNDIPFFSRDR	NA	NA	NA	140
TRINITY_DN12030_c0_g1_i1	type:5prime_partial	522	GATAAAGGCAAAGAGGCAAAAAAATTCATTGAAAGGGGACAGCTTGTGCCTGATGAACTTGTTACGAATCTTATTTTAGAACAGCTTTATTCACTATCCAAATGTAGCTGGTTACTTGATGGGTTTCCTCGAACTGTAAAGCAAGCCAAGGATTTAACTGAAAAATACAGTATTACATTAGCTATTAATCTTGCAGTACCTGATGAAGTTATTATTTCCAGATTAAAAGGTCGCTGGTTGCATCCAGCTAGTGGTCGGATATACAATACGGATTTTAATCCTCCGAAAGTTCATGGAATTGATGATATCACTGGTGAAAAACTGATCCAAAGAGAAGATGATAAACCAGATATAGTCTTAGCTAGATTACTTCACTATAAAGAAGGAAATACTCCTGTT…	DKGKEAKKFIERGQLVPDELVTNLILEQLYSLSKCSWLLDGFPRTVKQAKDLTEKYSITLAINLAVPDEVIISRLKGRWLHPASGRIYNTDFNPPKVHGIDDITGEKLIQREDDKPDIVLARLLHYKEGNTPVLEYFRKKSILREFSGKESNEIWPRVKLCLEELFRENKNRM*	Adenylate_kinase,_active_site_lid|PF05191.12;AAA_domain|PF13207.4;Adenylate_kinase|PF00406.20	AAH64656.1	194.5	114
TRINITY_DN12036_c0_g1_i1	type:internal	324	ACAGCCGATAATGAGCTGGAACACTCGACAACCCTACATTCGGACGGACTGGAGACCTCCAGCCTGAGCTTGAAGTTCATGGTGAACGAGCTGCATTTCCGTGGTGGCAACATGAAGCTCAAGTGCACCGCCACCATCTCCAGGGTGTACACCATGAGCAATGAGGAACTCGTTTTCGGGACCGGACTGAGACAACAGACTTCCGGACTGCACATCACGGAAAACATGAGCCACGTCCAAAATAGTTCTTCAAGGATACGCTCCGTCCATTGGACCCTGACACTGCTACTCAGCGCTCTCCTGTGGAAGTCCCTTCTCCTCCCC	TADNELEHSTTLHSDGLETSSLSLKFMVNELHFRGGNMKLKCTATISRVYTMSNEELVFGTGLRQQTSGLHITENMSHVQNSSSRIRSVHWTLTLLLSALLWKSLLLP	NA	XP_001662123.1	54.7	74
TRINITY_DN12051_c0_g1_i2	type:internal	336	AAAACATCGGAATGGAATTTAAGAGTTAAGCCTGTTTATTGGAAAGATATTGGTGGAGTGCAGAAAATCAAAGAAAGACTACAAATGAGTATAGAACTACCACTGAGCCATCCTGAGATTTTTGAGAAAGTTGATCTTCATTGTCCTAGAGGTGTACTTTTGTTTGGTCCTCCTGGATGCTGTAAAACTACTCTGGCAAGAGGCTTAGCTACTGAGTGCAATGCTAATTTTTTTGCTGCAAATCCATCCCAGATATACTCCTCGTATGTTGGTGAATCAGAAAAAAATATTGCACTACTTTTTTATCAAGCTAGAATTAGTGCTCCTAGCATTATT	KTSEWNLRVKPVYWKDIGGVQKIKERLQMSIELPLSHPEIFEKVDLHCPRGVLLFGPPGCCKTTLARGLATECNANFFAANPSQIYSSYVGESEKNIALLFYQARISAPSII	Magnesium_chelatase,_subunit_ChlI|PF01078.19;AAA_domain|PF13401.4;AAA_domain|PF13671.4;AAA_domain|PF13238.4;RNA_helicase|PF00910.20;Rad17_cell_cycle_checkpoint_protein|PF03215.13;AAA_domain_(dynein-related_subfamily)|PF07728.12;ATPase_family_associated_with_various_cellular_activities_(AAA)|PF00004.27;AAA_ATPase_domain|PF13191.4;AAA_domain|PF13481.4;TIP49_C-terminus|PF06068.11;Holliday_junction_D…	XP_001742191.1	121.7	89
TRINITY_DN12060_c0_g1_i1	type:internal	546	AATTGGCAAACTTGTGATATAAAAGAAACGGTGGACTATTTTGATATCGTTCACCAAGTAGTCGACGCACACATGTCCCTCTGCATTTTGCGTGTTCAAGGTGGAACAGATTACTCTTCATATTTTGAAACCCCAGAAGGATTGCCCATTGTGCCGATTCTCGATCCAAAAGGAAACCTCGTAACATCGTTTAAGCCACCAGATATCAAGATTCCTTTAGAGACTGTCATCGAAGAGACTCCGACCGATGATGGAGTTCCACTACCATATATAGTCATCTCGCCTAAAGCAGACGAGGATTTCAAACAAATGAAAACTGCAAACCTCTTCCACGACAGGCAGGAGAAGGGCATCATAGATGTCTGGTGGCTCTACGACGATGGAGGCTTAACTCTCCTG…	NWQTCDIKETVDYFDIVHQVVDAHMSLCILRVQGGTDYSSYFETPEGLPIVPILDPKGNLVTSFKPPDIKIPLETVIEETPTDDGVPLPYIVISPKADEDFKQMKTANLFHDRQEKGIIDVWWLYDDGGLTLLLPHLLTTRAQFKDCKLRVFSVAQDHTNIGEEQRNLSALLQKFRIPFKDQ	Solute_carrier_family_12|PF03522.13	NP_001106707.1	43.5	280
TRINITY_DN12064_c0_g1_i1	type:internal	333	GAAATGTACATCTCTCTCAACTCCGATCCTACGCAACCGTCAAAACCTGTTCGGAACGACATTTTCTCCTCCGGGTGTCATTCCACCCCAGCAAGCCCCGAAGAAACCGAAAGAACTCGCAACAAGCAACTCAAGAAAGACCTTTCATCTTTCCACAGCCCCATAATCGACAAAAAATTGCCTTTCAGTTTCTCGACTAGTTTCGTTAGAACTTCTAGGAGCGAAGACCACCTTCGGAAGTCATCTTTAACCACAGTGAACATTGATATTGAAGATGAGCTCGCGTCGTCGCTCGATACTCTTTTGGACACGAAGGCCGACGACGTTTTTTAT	EMYISLNSDPTQPSKPVRNDIFSSGCHSTPASPEETERTRNKQLKKDLSSFHSPIIDKKLPFSFSTSFVRTSRSEDHLRKSSLTTVNIDIEDELASSLDTLLDTKADDVFY	NA	EEZ97290.1	52.4	68
TRINITY_DN12068_c0_g1_i1	type:complete	714	ATGCGAGCACTGGAGTTCTTATGTACTTGCTTGACTGCTATCATGTTTAAACTTCCTGGTGAAAAAGTAAACCCATATGGTCTTAATTCTAATATGAAAATAGTGGTGTTCATCGTATTGACGTACTGCATACCCGAAACAAAGTCTACTATCCTTTCCGCAACCGGGTACATCGCTTCTTCTTCACCTGTAAGAAACTCTTTGATTTCATCTGGTATTGGCAGTTTTATTCAGAATAGTGCTACTGCCCTTTATGATGCAAGTGGATTTCGTTTTGCTAGTGATCAAGGTACAAATGTCAGAAAAGCTGTTATGAAGAATCACACGATTGTCGAAATTGGAGAAAACTATCGTCTTAGCAATCGAAAGGGTGAAGTTTCGAACTCTGAAAGCGTTGTA…	MRALEFLCTCLTAIMFKLPGEKVNPYGLNSNMKIVVFIVLTYCIPETKSTILSATGYIASSSPVRNSLISSGIGSFIQNSATALYDASGFRFASDQGTNVRKAVMKNHTIVEIGENYRLSNRKGEVSNSESVVNEDRIYSERLFGVLNQMDKNACISRLLCEIGSNPISFGAIGLKINHYIRSVPPVTWNSATFPYVEAFQAGSKERIDVCVKHYSNCTYNLHRIVDFLWNIINPIY*	DM4/DM12_family|PF07841.11	NA	NA	4214
TRINITY_DN12075_c0_g1_i1	type:5prime_partial	1179	AACTTCAAGATGTTTCTGGGCTTGATCCTCCTTGGCACCTTCCTATCTTTAAGTGAGCAATATGAAAACTCATTCTCCAAACGAATAGAACCTCACAACTTCTTACAATTCAGCAGCATAGCACAAGAGCCAACACACTTCCAATATTCTAGCTTCGGATCTCAATCTTCAAGTGCTGAGAGCAATCAAATTTCACCGGAACCGTTCATCAGAAGACCGCCTTTTCTTAGTTATCAGAATGGTGTCGATGACAAGTTTCGAGAACCTCGAGATTTTGAAGACCGCCAGAGGATCAATAAGTTCCATGAAACAAGGGAATTCGAAAGTCGACAGAGTGATGAGAAAATTCAGGGATTAGATGGAAGAATGAATGATGATAAATTTCAAGGAACAAGAGAG…	NFKMFLGLILLGTFLSLSEQYENSFSKRIEPHNFLQFSSIAQEPTHFQYSSFGSQSSSAESNQISPEPFIRRPPFLSYQNGVDDKFREPRDFEDRQRINKFHETREFESRQSDEKIQGLDGRMNDDKFQGTREFMGRQRNDKLQGTQHFEPRERNEKFQGVQDFDLRERNDKFQRIQNFEPRDRNDKFQEIKDSGMRRRTDKFQGSRDMVPQRNMRYEEGFRGIPSSESGKFNRLSKPWHSSHFADHRGRQRHPRLSSSSRRDSYKVRENFHFDGKRPVMAEIKRSPRIVKYIADKNGFAIREDLVKPLQDTIDRTRQESRRRIVTAPASGLPQNSLMSQVVTSAIRVSGQSNSNGEGKFIPQIFDLSVGKKPNHIDIDKLAYSLGAKEIIL*	Insect_cuticle_protein|PF00379.21	NA	NA	704
TRINITY_DN12080_c0_g1_i1	type:5prime_partial	444	GTGTGCTCTTCCGATCTGTTTGTATTTATGGCCATCTTTAGTTCTCTTGCATTTTACTGTGAATTTTATAATACAAATGCAAACTTCTTGGGAATATTCCTATTCTTTTTATGTATACTTTTAATCCTTAAGTTACATGTTAAAGTAAAGCAAGAATCCTTATTGGTTATTGCTTCACTTGGTCTTCAATTAACAACTACTTTTGTCACTGGTAGAAAAGAATCCCAATTCATTCTGAATCAAAATATATATGATGTTGTAATAAATGAAGGAATATTTATGCATAGAATAATATTTTATTTGGCTGTTCTATTAAGAGACATCAAAGATCCACTCAAAATTAGTAGTATTGCTCCTTTGTTTCAACACACATTTCCCAGATTGGATTGCTTAGAAAAA…	VCSSDLFVFMAIFSSLAFYCEFYNTNANFLGIFLFFLCILLILKLHVKVKQESLLVIASLGLQLTTTFVTGRKESQFILNQNIYDVVINEGIFMHRIIFYLAVLLRDIKDPLKISSIAPLFQHTFPRLDCLEKMYNGIQNSFQNNHS*	GPI-GlcNAc_transferase_complex,_PIG-H_component|PF10181.7	AAI57353.1	104.4	277
TRINITY_DN12093_c0_g1_i1	type:internal	372	CTTCATACTCGTCTTTCATCATGGTTGGACATGTTGGAATTGTCCAGGCAATCAAGAACTCATAGCGTTGCACATTCAGGAAGCACAGCTCAAAATGGTAGTCAACACAGCAGCACAGGCCCTAGTAATAATACAGGCTCCACCAACATGACCAATGTAAGCACTGCTACTGTGCCATCAACAGGAATACATGTTCCTGTTTTTCCTCAGGCAATATTATCTAATGCTGGCAATAATTTATTGCAACAAAAGCTTGGAAACAACCATCACATGGTGCAAGGTCCACACATTCTATCAAACCCTTTTCCCAATGATCAGTTAAATGTCATGTCTTTGCCAAGATCTACTGCACCTAATGTAAGGCAGCTTCCC	LHTRLSSWLDMLELSRQSRTHSVAHSGSTAQNGSQHSSTGPSNNTGSTNMTNVSTATVPSTGIHVPVFPQAILSNAGNNLLQQKLGNNHHMVQGPHILSNPFPNDQLNVMSLPRSTAPNVRQLP	NA	NA	NA	223
TRINITY_DN12095_c0_g1_i1	type:complete	861	ATGGACCCATTCTACCCTAACGTGTCTTCTATGGTGAGCCTGACAGAAATCAATCGCAGTCAAGATGAAATGAAGTACATCACAAGAATGCGCAATGCTTTTGAATTTCGAACGGCGAGCAGCAAGGATTACAGCTTTTTAAATTCTTCATTTCAACACATTATATTATGCTCATCGAGACGAAAACCTGTACTGGAAACGTGTTTAAGGCATACTCTTTCTAAAGTTGTGAACTCTCCCGTTTTGCTACATAATTATGCACCTTTCGCTCAATTGACGTTAATAAATGGCGAAGATCAGTTTCAAATAGAAGGTAATCTCGGTCAACCAATCACATTTGTTCAGCAAGATGATGATTATAAGAAAACAGGAAGTTTTTTAATAGCGAGTCTAAAATTT…	MDPFYPNVSSMVSLTEINRSQDEMKYITRMRNAFEFRTASSKDYSFLNSSFQHIILCSSRRKPVLETCLRHTLSKVVNSPVLLHNYAPFAQLTLINGEDQFQIEGNLGQPITFVQQDDDYKKTGSFLIASLKFQPKFSLDIGWSHWNTLQIQFLMVTELSSLQENNAEDLNSMHASGWRRVFADNFIDFSCTDSDIAYYIKEQTEVGRPIHVFKEIFKRERGGTLNTFRILESIVSPYYYVLPQHGEGPHDLMTNIVAIGRTLRNSDIPIPWDELFCFESRCIKLL*	NA	NA	NA	606
TRINITY_DN12098_c0_g1_i1	type:internal	336	AAACATAATGGCTCACCTGTTATACCTTTAATGTACCCTATACCAATAAGATTGCAACCTAAATCATGGAATGAATTATCTTTCGGAGAAATGGATGAAGAGAAGGACAAAGAAAATATTCCTGATGATAAGCCAGACATAGGTTTATTAAAAACAAAAATGTCTGGAATTGGTGGCTACTCGGCACCTCTTAAGGACTCTGGTAATGTTGCTGTGACTTTAACTTTATCATCAGCTGCTGCAGAAGATATCTGTGGAGTTTTGACAGCTCTTGCTGATCTTCTGAAAATACCAATTCCAGCATCTTATGAAATTGTAGAAAGAACTGCAGATCGG	KHNGSPVIPLMYPIPIRLQPKSWNELSFGEMDEEKDKENIPDDKPDIGLLKTKMSGIGGYSAPLKDSGNVAVTLTLSSAAAEDICGVLTALADLLKIPIPASYEIVERTADR	NA	XP_001650833.1	68.2	77
TRINITY_DN12100_c0_g1_i1	type:3prime_partial	1242	ATGACGGCTAATATGTACAGAGTTGGAGATTATGTCTACTTTGAGACATCATCGACATCCCCGTATCAAATTAGGAGAATTGAAGAGCTTATAAAGACACCTAACGGAAACGTTGAAGCAAAAGTTATGTGTTTTTTCAGAAGACGTGATATTGCCACATCCCTTGTGATGATGGCTGACAAGCAACGTCACGAGAATATGGATGCCACATTAATAAGTGCCTTAGAAGAAGAACAAGAACGAGAGGCAGAATCATTAGCTGAAAAAGAGCGTCATCAGTTAAAACACAGAGAACTATTCTTGTCTAGGCAAGTAGAGACATTGCCTGCAACACATATTCGTGGGAAATGCTCTGTAACTCTGCTGAATGAGACAGAATCCCTTTTGTATTATTTAAAT…	MTANMYRVGDYVYFETSSTSPYQIRRIEELIKTPNGNVEAKVMCFFRRRDIATSLVMMADKQRHENMDATLISALEEEQEREAESLAEKERHQLKHRELFLSRQVETLPATHIRGKCSVTLLNETESLLYYLNKDDCFFYSLVFDPQQKTLLADRGEIRVGPRYQAEIPPLLPEGAEDPRRSEDLEQLVYTPHHNLTDRQIDQFLIVCRSVGTFARALDCSSSVKQPSLHMSAAAASRDITLFHAMDILHKHNYDITSAISSLVPSGGPVLCRDEMEEWSASEANLFEEALEKYGKDFIDVRQDFLPWKSLKNVIEYYYMWKTTDRYVQQKRVKAVEAESKLKQVYIPNYNNKPGVLNGACAGESPSASGRPCESCYTPTSSQWYAFGPAHLQCRLCQS…	GATA_zinc_finger|PF00320.25;Myb_DNA-binding_like|PF15963.3;ELM2_domain|PF01448.22;BAH_domain|PF01426.16;Myb-like_DNA-binding_domain|PF00249.29	NP_001087897.1	603.2	1247
TRINITY_DN12108_c0_g1_i1	type:internal	498	CGAACTCATTCTGATGTACGTCATGAAATAAAAAGAGAGAGGGACATTAGTCCTTTATCCCTTCCCCTTCCTAAATTCGCTGCATCATTAAGGTCTCCTAAATCATCTCCAAGTGTTTTGACTTCACCAAAGAGCACAACAGCTCACAGTCCAAGAGCTGGTTTTTCTCCTAGTTCATATTCATCTAGCAAAAATGTCCGTATCGCTGATATGCTCCAAGATTTTCAGATTGAAAAGAAAGCAAAAGAATCGCTGACTGAGGAAAAGGTTAACGGTGCTACTGTTTCACCCGTGGATTCAATATCTCCAATTGAATTGCATGTAATAAATGAAATTTCGGAAACCGTATCTAATGTTGAATCAATACAATCTCCAAAAAGCATTGCTGAGAAGATTAAA…	RTHSDVRHEIKRERDISPLSLPLPKFAASLRSPKSSPSVLTSPKSTTAHSPRAGFSPSSYSSSKNVRIADMLQDFQIEKKAKESLTEEKVNGATVSPVDSISPIELHVINEISETVSNVESIQSPKSIAEKIKELHSSSESEFSPSASPSRPSIEDRIKALDEKFN	Tryptophan_operon_leader_peptide|PF08056.9	NA	NA	314
TRINITY_DN12109_c0_g1_i1	type:complete	774	ATGGGTTCCGAGCAAAGTAGCCAATCTTCCAAATCTCAAAACATTCTTAAATCGGGAAGTAAAATGAAAGAACACCAGAGAGCGAGAAGTGCATCTCCTGGTCCATCAATAAGTTCAGATTCTGACATTCCGTATATTTCATATACAGTAAATCGACCAATTGGAGATTCACCAAAATTGTCATCTAAAAGTCCGGCGCATAGTTTACGTGCTTCAGCCACTCCTTCACCTCGATCCTCTCCCAAAGCACCTAGACCTAAATCTTATGCTGGATCCTCATCAGGGCATGACATAGTAGTTGTCAAAGAGGGGGCTCCTAGTATGGATACTCTAGAAACAGATGCAGAACTTATTCGTCTCCAAAAAATACCATCATTTCATCCTATAATGCGGGGAGCA…	MGSEQSSQSSKSQNILKSGSKMKEHQRARSASPGPSISSDSDIPYISYTVNRPIGDSPKLSSKSPAHSLRASATPSPRSSPKAPRPKSYAGSSSGHDIVVVKEGAPSMDTLETDAELIRLQKIPSFHPIMRGALNIPNTTIHDPEVLDKLDYQCILRLCQRYQDHLKMCAETVSTEQNALIQRIREIDFAINTLTNMLTERQKKFVKYAEQLSKVTEISNNLQKCQTGLKDVIKNMETLNNMLPPEERLEPFVMVTG*	Golgin_subfamily_A_member_5|PF09787.7;ALIX_V-shaped_domain_binding_to_HIV|PF13949.4;Centrosomal_protein_of_63_kDa|PF17045.3;Tumour_suppressor_protein|PF10158.7;Inhibitor_of_growth_proteins_N-terminal_histone-binding|PF12998.5;YcbB_domain|PF08664.8;Latarcin_precursor|PF10279.7;Nucleopolyhedrovirus_P10_protein|PF05531.10;HAUS_augmin-like_complex_subunit_2|PF15003.4;Protein_of_unknown_function_(DUF1…	XP_967828.1	156	496
TRINITY_DN12119_c0_g1_i1	type:3prime_partial	540	ATGGATCCTGTGTTAACCATATCACCCTCCGAGAACCATCACCTATCGCCATCGGATGCTTCTTTAAGCCAATGCAGTGGCCCTCAGACAACACCCAAGTTACCAAAAAGAGAAAGATTGGCCTCTTTTTCTAGACTTGTGACATCTAGTAACTTTTTGGATCTTCTTCCTTCTAAATCAACCAATGGATACAGAAGGATCAACGTAAAAGGAAGAGATTTTGCTATTGAGACGTTGCCATCTATTCATATTTCACCTAGCAGTCCACCAGGACAAAAATTACCGAAGAGGAAAATTGATGCTTCCTTCTTACAAGCTGTAGGAAAAGGATGCCTTGATTCTCCTCAACTCCCGTTTTCGCCCCGTTTGCTGGACAACAAATCTCCACGCTACATGTCT…	MDPVLTISPSENHHLSPSDASLSQCSGPQTTPKLPKRERLASFSRLVTSSNFLDLLPSKSTNGYRRINVKGRDFAIETLPSIHISPSSPPGQKLPKRKIDASFLQAVGKGCLDSPQLPFSPRLLDNKSPRYMSPNYKYPTPTKSPLYKSDCKSGFLGRGSFGNVTLCIYKNSKFALKVSR	NA	NA	NA	228
TRINITY_DN12124_c0_g1_i1	type:internal	486	CCTACTAGCTCTGGAAGCAATACTAGTACATCACCTAAGTACTTGTATGATATTAATGTAAATTCTCCTGTTGCTAATATGTGGGCAGCTCATACAAACAGCGATGACAAGTTTTGGTGTTGGTCTCCAGTTGTATGTGAATCTGAACTATCTGAGATTTCAGAGATGGAAACAGAATCTTCTATGGAGTCAAAAAATGAGGAAAATTCTAACATTTCTGATAAAAATATATTTTCTTCATGTGATGAGAATTCTGCATTTTCTAGTAATTTTGTAGAAATAAATGAACAAATGTCTGATATCATACCTGGTACTCTAAGTGAAAAACGCAATTTAAAAAATATATCTGAAAATGCAAAGGAATGTTCATCTTCTAAAAAGCAAAAGACTGATGTTTTA…	PTSSGSNTSTSPKYLYDINVNSPVANMWAAHTNSDDKFWCWSPVVCESELSEISEMETESSMESKNEENSNISDKNIFSSCDENSAFSSNFVEINEQMSDIIPGTLSEKRNLKNISENAKECSSSKKQKTDVLVQVSLDECTGNEEVRTPLQCFETSPEIGR	NA	NA	NA	118
TRINITY_DN12133_c0_g2_i1	type:internal	441	TCTTTTAATTACAGCTTGGCTTCTGTAGCATGCATGAAATCTAGTACAAAGAAAAAGGCAGCAGCAACAACACCTGCTGCTTCAACAAAAGTAGTTGAGACTACTTCTAATGAAACTACTAATGATAGTATTTCTACTCCAAGCACACAAGTTGAATCAAATTCTGAAAAAGCAAAAAATGATAATATTGATTGGTCATCAGATTGTGAAGCTGCTATCAGAACAGAGAATAATGATTCAACTCCTTTAACTCCAACAAGTACAAATGATTCAAATATAAGTAGTAAAACAATTTCTGGTAATCAGACTTATACTATGTTCAGTGAAGGAGCTGTTCATGGGCAAGTAGTTTTATTAAATACTTTACCTGGTGAGAATGATGATCAAAAAGTAATACTT…	SFNYSLASVACMKSSTKKKAAATTPAASTKVVETTSNETTNDSISTPSTQVESNSEKAKNDNIDWSSDCEAAIRTENNDSTPLTPTSTNDSNISSKTISGNQTYTMFSEGAVHGQVVLLNTLPGENDDQKVILCAGDQKILATALPI	NA	NA	NA	226
TRINITY_DN12140_c0_g1_i1	type:internal	987	TCTTGGTACAAAACATATGGAAGAATCTATGGGAGATATGAAGGGATTAAACCAGTGCTTTGTGTTGGCGAATTAAACATTCTTAGAAGGATATTCATTAAGGATTTTCTTAGCTTTCCTAATCGCAGGGACATGAAATTTGGCGACCCAGTTATGGACAACACGCTGTTTGTTTTAGAAGATGAACCTTGGAAACGAGTCCGAAATGTTGTCACACCTGCATTTACTACTTCCAAGTTAAAAAAGATGATGGTTTTGCTGCAGACCTGCTGTGATACGCTGGTTGAAAACCTTACGAAATCTTCACAATCATCAGAAATCATTAATTGTCAAGAAATCTTTGGAGGATTTGTTATTAGTACCATTGGAAGATGTGCTTTTGGAATGTCTATCAACTCC…	SWYKTYGRIYGRYEGIKPVLCVGELNILRRIFIKDFLSFPNRRDMKFGDPVMDNTLFVLEDEPWKRVRNVVTPAFTTSKLKKMMVLLQTCCDTLVENLTKSSQSSEIINCQEIFGGFVISTIGRCAFGMSINSMKDPNNAFVEKSKKLFNENLSWRTRLTLLCPILMKIFRMKLLNPETTGFYRNIIIQVLEERKNTSLIFDDFLQVLLDAEESNNNGEDAICEKGSCQTKVNTGAKVQKKGLSYDELVSQCVTFFIAGFDATTSLLSHLVYRLAMNQQYQENVYNEMNEALVNDDGTLSYGVLKDMKYLDAGINECLRLCPAMVRSER	Cytochrome_P450|PF00067.20	XP_001362807.1	111.7	412
TRINITY_DN12143_c0_g1_i1	type:internal	570	ATTAAACACAGTTCTGTTTGCTTAAAACAATTTAATAAAAGATATTCCACATTTATACGTAAAGGACCTAATGGCGAATTTCTAAAATGTGTAACTTTTGCCGTGAATGGTCAGAGAAACATAGCTTTTGTTTTCCGTGCATTAAGAGGAGCTTTAAGATTACGGTACATAATACTGGGTTCTGCTGTCACTGGAGGAGTACAGATATCTAAGAAATATGAAGAGTGGAAAGACCAGCTACCTGATTTTAGTTGGATATCAGATATGATGCCTCCTCCTGAAAAGATTGACTCTTATCGTGAAGCATTGATTGACTTCAAAAATCGTATTAATTTACCTGAAAAAGGATGGTTTAAAAATAACATAGATGCATTAGCTAGTAGATTTGATGAGTGGAAG…	IKHSSVCLKQFNKRYSTFIRKGPNGEFLKCVTFAVNGQRNIAFVFRALRGALRLRYIILGSAVTGGVQISKKYEEWKDQLPDFSWISDMMPPPEKIDSYREALIDFKNRINLPEKGWFKNNIDALASRFDEWKDLLDSENLSDGDPTTDIAEGLFANFGANSPSLPLGIALQTAMSATSSPFRGSSDSSA	NA	XP_001657306.1	74.7	290
TRINITY_DN12160_c0_g1_i1	type:complete	654	ATGGCGAAAATAAACATTTCTGGATGGTGGATACGTGCAAGTACTTGGGTTGGACATGATCATATTCGAGAGAAGTGTAATGAAACCAGCTTGGTCAGTGGTGAATCCAGTGATATAATTGGTTCGATACCAGTAACCAATCCAAAAGAAGGCGTGACGTTCAAGAACTATTACTGTGCCATGTGCAACGATGATGCAACGGAAGATCTTGTGGAATGGCAAGTTAAAGCTTTGTGTGCAGATGATCTTGTCTCACAAGAGGACATTTTGCAGAACCTGACATTTGTGGAAGACAAGCAACAATGGGGTGTTTGGAAATATGATACACAACAGGACTGGACTTTTCACGAATGTTATTTGTTGTTCCAAAGACCTTCCAATATAACAAATGGCATCAGG…	MAKINISGWWIRASTWVGHDHIREKCNETSLVSGESSDIIGSIPVTNPKEGVTFKNYYCAMCNDDATEDLVEWQVKALCADDLVSQEDILQNLTFVEDKQQWGVWKYDTQQDWTFHECYLLFQRPSNITNGIRHCTAGMISSCPRFWQHIATRRKCKSYVDPVRWSDGPVFRNIDCAMCHNRTSDQFQCVKDVTSSTSAIMLSRAMKVDISCSGQWL*	Somatomedin_B_domain|PF01033.15	NA	NA	532
TRINITY_DN12165_c0_g1_i1	type:internal	441	TCCATATCCATGCTCAAGCCCGTATCCGTGTCCAAGTCCATATCCATGCTCAAGCCCGTATCCGTGTCCAAGTCCATATCCATGACCAGAAAGTCCATATCCGTGTCCGCCGAGTCCATATCCATGACCAGCATATCCAAGTCCATAACCATGACCAGCATGTCCAAGTCCATAACCGTGACCAGCGTGTCCAAGACCAGCGTGTCCAAGACCAGCATGTCCAAGTCCATATCCGTGTCCAGCATACCCAGCACCGTGGTGTCTGACGTCATATCTTGTGCTCACTCCATGTCCACCATAACCGTGTCCATGTCCATAACCATGGTGACCGGCCTTGTGATGAATAACGAGGCTACCATGACCACTTGGGACAGCGGCTACACAGGCCAAGAGGGCAAT…	SISMLKPVSVSKSISMLKPVSVSKSISMTRKSISVSAESISMTSISKSITMTSMSKSITVTSVSKTSVSKTSMSKSISVSSIPSTVVSDVISCAHSMSTITVSMSITMVTGLVMNNEATMTTWDSGYTGQEGNESNLLPRTFRSHKS	NUDE_protein,_C-terminal_conserved_region|PF04880.11	XP_001325206.1	53.1	469
TRINITY_DN12166_c0_g1_i1	type:5prime_partial	606	CGATCTTCTGGTCTTGGAAGAGCTACAGCTGAAATTTTTTCACATCAAGGGGTAAATGTTGTAATATGTGATCTTCCAACATCTTCTGGAGTGATGGTAGCCAAAAATTTAGGAAGCAATTGCATTTTTTCACCTGCTGATGTTAGAGAAGAAAGTGATGTGAAAAATGCTATGGAAGTTGTCAAGTCAAATTTTCAAAAATTGGACATTGTTGTAAATTGTGCTGGAGTCAGCACAGCCTTTAAAATCTACAATTTCTTGAAAGACCGACCTAAACACCTCTCTGACATAGAAAAAGTTTTACAAGTTAATACTATTGGTACTTTCAATGTCAACAGGTTGGCTGTTGAAATGCTTGCAAACAATACACCTGATGAAAATGATCAAAGAGGTATTATT…	RSSGLGRATAEIFSHQGVNVVICDLPTSSGVMVAKNLGSNCIFSPADVREESDVKNAMEVVKSNFQKLDIVVNCAGVSTAFKIYNFLKDRPKHLSDIEKVLQVNTIGTFNVNRLAVEMLANNTPDENDQRGIIINTSGISAFEGIIGQGAFAASCHAIVSMTLPMARDLSSHGIRVCTIAPGILCILLQFIYHKICRVTCT*	Enoyl-(Acyl_carrier_protein)_reductase|PF13561.4;KR_domain|PF08659.8;Zinc-binding_dehydrogenase|PF00107.24;short_chain_dehydrogenase|PF00106.23	XP_001659938.1	209.5	196
TRINITY_DN12169_c0_g1_i1	type:internal	342	CGTTCTGAACATAGAGGGATATTAACAACGTTTCTTGGAAAATATGTATGGTATGAAGAATATCCTACTATTCCTAGTTCATATGTGCTCAATGGTTTCATATATTCACTTTTTGGATTATACGATGTGCAGCGAAGTGGTACTCATCAGCTTTGCCATGAAGCTGGAAAACTCTTCGAAAATGGACTTGTTTCATTAAAAAAAATGTTGCCTCTTTTCGACACAGGTTCAGGTTCAGTGTATGATCTTCGTCATTATTCTCTTGGTGTGGCACCAAACTTAGCTCGTTGGGACTACCACAGTACACACATCAATCAACTTTTGTTCCTCAGCACCATCCAT	RSEHRGILTTFLGKYVWYEEYPTIPSSYVLNGFIYSLFGLYDVQRSGTHQLCHEAGKLFENGLVSLKKMLPLFDTGSGSVYDLRHYSLGVAPNLARWDYHSTHINQLLFLSTIH	D-glucuronyl_C5-epimerase_C-terminus|PF06662.11	XP_001650002.1	166.4	91
TRINITY_DN12172_c0_g2_i1	type:complete	984	ATGAAGATGTTAACAAAATTCATATTAATCTTTATACTGTGTATTTTTAATCTTCCAGATATTAAAAGCAAAAAAGAAGCTCAAACTCTTGGAGAAAGAGTTCAGGAGCTGGTTGAAATGTCTTCTAAGCGAGCAATCATACGTTTCACTGGTGATAAATTTCGACAATTCATTAAAGCTACACCTAGGAATTATTCATTCATTGTCATGTTAACAGCTCTTTCACCTCATCGGCAATGTATTGTGTGCAGGCATGCATACGATGAATTTCAACTAGTGGCAAATTCATGGCGATATTCACAACTTACTACAAATAAATTGTTTTTTGGCATGGTCGATTTTGATGAAGGACCTGATGTATTTAGTTCACTTGGAATGAATTCTGCACCTGTCTTTATG…	MKMLTKFILIFILCIFNLPDIKSKKEAQTLGERVQELVEMSSKRAIIRFTGDKFRQFIKATPRNYSFIVMLTALSPHRQCIVCRHAYDEFQLVANSWRYSQLTTNKLFFGMVDFDEGPDVFSSLGMNSAPVFMHFPEKGKPKKGDQMDIQRIGFQAETIARWIAERTDIQIRVFRPPNYSGTIALVILFALIAALLYMRRNNLDFMYNKTSWGLAALCIVFAMTSGQMWNHIRGPPFMHRSTRGSVQYIHGSSGGQFIVETYIVIVLNIAIVIGMILLHEAAASKGDSKKRKIMAIIGLAVVAIFFSLLLSVFRMKAQGYPYSFLFK*	Domain_of_unknown_function_(DUF4131)|PF13567.4;Predicted_membrane_protein_(DUF2339)|PF10101.7;Yip1_domain|PF04893.15;Thioredoxin|PF00085.18;Integral_membrane_protein_(intg_mem_TP0381)|PF09529.8;Branched-chain_amino_acid_transport_protein_(AzlD)|PF05437.10;Mysoin-binding_motif_of_peroxisomes|PF12632.5;EpsG_family|PF14897.4;OST3_/_OST6_family,_transporter_family|PF04756.11	XP_971395.1	460.3	10147
TRINITY_DN12175_c0_g1_i1	type:5prime_partial	618	AGTATTGTTCATGTTTTCTATGAACAGTATTTGACTATGTGGCCAGACACTTTGAGAAGCCTTGGCTTATCTACATCTGCTGTATTTATAGCCACATTCCTTTTGTTAGGACTTGATTTACATTCTGCTATCATTGTCACAATAGCTGTAATTGCAATAGTTCTCAATATTATGGGTCTTATGTATTGGTGGGATATTTCTTTAAATGCTGTGTCGTTAGTAAATCTGGTGGTGGCTGTTGGCATATCAGTTGAATTTTGTTCACACTTAACTAGAAGCTTTGCCCTTAGTGAAAAACCATCTCGTGTTTTAAGAGCAGAAGATGCACTTTGTCAAATGGGAACATCAGTTCTCTCTGGTATCACATTAACAGACTGTGGGATTTTAGTTCTAGCAATT…	SIVHVFYEQYLTMWPDTLRSLGLSTSAVFIATFLLLGLDLHSAIIVTIAVIAIVLNIMGLMYWWDISLNAVSLVNLVVAVGISVEFCSHLTRSFALSEKPSRVLRAEDALCQMGTSVLSGITLTDCGILVLAIAKSQIFQVFYFRMYLGIIAFGTLHGLIFLPVLLSLFGPPLRWKKARELEAFECKIDQPLTNNAQIEVQLTDM*	Patched_family|PF02460.16;AcrB/AcrD/AcrF_family|PF00873.17	XP_001656693.1	236.9	426
TRINITY_DN12176_c0_g2_i1	type:internal	321	CGAACATCTAATTCTCGAAAGCTGTGCAAACCATGGTGGAACGCTTCCTGCCAACAAGCGAAAAAGGAACAAAGGAGGGCGTGGGGTATTTTCAGGAGGTACCCCACAACTGATAATCTCATAGCGTTCAAACGTGCGAAAGCGTTAGCTCGTCGCATACGTCGTCAATGCCAGAGAGAATCTTGGATCAAGTATGTGTCTTCAATCACATCGTCAACTACCAGCCAACAGTTATGGAGAAAGGTCAAAGCAGCGAATGGTCTTTATCGGGAATTTAACATTCCGATATTGGAATCTTCTACTGCTTTGTTTTCGTCACCT	RTSNSRKLCKPWWNASCQQAKKEQRRAWGIFRRYPTTDNLIAFKRAKALARRIRRQCQRESWIKYVSSITSSTTSQQLWRKVKAANGLYREFNIPILESSTALFSSP	NA	NA	NA	40
TRINITY_DN12185_c0_g1_i1	type:3prime_partial	1041	ATGTCATCGGTAGCAAAATGGAAAAGAACATTTCGTCAAACAAATACATTTCAGATAATATTGTGTGTTATATTATTTCATTCTTTAGCTTCAATCTTTATTATCTATGTACATCTTGCTTGGTTTTTCTCTGAAGAAGAAAAATTATGGGATAAAACTGATGAAAATCGTTACTCAAAGAAAGAATTTGTTTTTTGGAATATGCGTTCTGTTCTTAATGCACTTTCTAGCAAAGTGATCTCTAATGATGAAATATCTCTGACGGGGTGGTGGATGGATCATGCTAGATGGGACACAGACATTCGATGTTTTAATCAAAAATGGACTTTATGTTCAAAGGGATTTAGTACTATTTGTAAATCTGATGGTATCAGAGCAATCTACCAGTACTTAACGTTT…	MSSVAKWKRTFRQTNTFQIILCVILFHSLASIFIIYVHLAWFFSEEEKLWDKTDENRYSKKEFVFWNMRSVLNALSSKVISNDEISLTGWWMDHARWDTDIRCFNQKWTLCSKGFSTICKSDGIRAIYQYLTFSKEFNINSFELSITATADQLEPQVIGASFGALALVKLNDGRVETIQIQFPPNIDPLTMKSVSFSASHSSINSVTVMLMCYGYTGSIHFTDPVLIPRVSSYVPKQKLIEACPAETLRVHPSTTVGKIEEIFKANNKSITDHYHMVTLVTQVSMERLATLERSLQLWEGPVSLVIYVTTKQHSEKSSFEWQRLYIQKKLKNIKLVSSSHVTLVFGD	Glycosyl-transferase_for_dystroglycan|PF13896.4	NA	NA	1300
TRINITY_DN12187_c0_g1_i1	type:internal	372	AAAAATGACGGGTTTCTTAGTTTGCTTCTGTCAAGTATGCAAGAACCTTCTCCTGGAGGGGCGAAAATTGTAACTGGACTTTCTTCAACTCTCCAAGATTTTCGCGACTCTGGCATCTCAATGATTGGTCAGTGTATGGATGTTTCTGAGGCCGCTCTGGCAAGTGGTGGTCAGGGAATGGTTGTTCCTAATCAGAATGTACCCACAGATCCTCAAACTCAAGCACAGTTTGAGGCTGACAAACGAGCTATTTACAAGCATCCACTATTTCCTCTACTTGCACTTTTGTTTGAAAAGTGTGAATTAGCTACACAAAGTGCTGAAGTTTCTTCCTCAGAAAGTTTTAATATGGACATTCAGGCATTTGTCCAG	KNDGFLSLLLSSMQEPSPGGAKIVTGLSSTLQDFRDSGISMIGQCMDVSEAALASGGQGMVVPNQNVPTDPQTQAQFEADKRAIYKHPLFPLLALLFEKCELATQSAEVSSSESFNMDIQAFVQ	N-terminal_of_Homeobox_Meis_and_PKNOX1|PF16493.3	AAO47087.1	96.3	108
TRINITY_DN12189_c0_g1_i1	type:complete	543	ATGGAGCAACAAAATGTTGTCGAAAAGAGAAAACTTGAAGATGATAATACAAAACGAAGTTATAAGTATGCTGCAGAAAATGAAGGCCATGTTGTAGAAGGAAAAGATGAGGGGAAAAGTGAATTTCAGAAAAGGGAAGAAAAGAAGATTAAATATGCAGAACATTCTAATGATGATATTAAACTTTTTTCAGATGACTTTGATTTCTGCAGGAATCCTACAGCTGCGTACAAGAATGAATCTCATGAAAGAGAAGATGAAAAGAAAGCCGACTTAGAAGAACGTTCTAATAAGCATGAGATTAAACTTTTTACATTTGATTATGATGATGACGACTTAGAACTCTGCGGTTATCGTAGAACTCCGTACAAGCGTAAACCTCGTGAGGAAAAGGGATTG…	MEQQNVVEKRKLEDDNTKRSYKYAAENEGHVVEGKDEGKSEFQKREEKKIKYAEHSNDDIKLFSDDFDFCRNPTAAYKNESHEREDEKKADLEERSNKHEIKLFTFDYDDDDLELCGYRRTPYKRKPREEKGLDFLSKLELENPTEEEELSDQLKFIKYKYERKRKPVKRSSTKVSSSKE*	NA	NA	NA	4119
TRINITY_DN12198_c0_g2_i1	type:5prime_partial	492	TTAGAACAATATCAAAATAAAGTGATGCAATTGGAACTAGATAAAGAAAATTGGATGTTAGAATGTCAGTTATTGAGAGCAAAAGGATCACAAGATCCTGATGTATCTCATGCAAACATTGAGAACAAAACTCAAGATTATGATGAAATTCATCTCTATGTAAAAAATACTGCTAATCAGCTTATTAAACAAATACAGTTTGCAGATAGCAAAGCTATAGCCTTCAAAAATGAATGTGAAACATTACATCAAAAGTTGAAATTGAGTGTTCAGAAGAAAGAAGAATTACAAAGTGAGATTGTGACTTCAAGACAAGTCATTGATCGTATGAAGGATGAACAGAAAACTCTTGTTCAAACCTATGATGAACAGTTAAATACAATGAGTGAACATTTAGCT…	LEQYQNKVMQLELDKENWMLECQLLRAKGSQDPDVSHANIENKTQDYDEIHLYVKNTANQLIKQIQFADSKAIAFKNECETLHQKLKLSVQKKEELQSEIVTSRQVIDRMKDEQKTLVQTYDEQLNTMSEHLANLNETLTSQKDEIDALKQAGNKGSRKGKNK*	Protein_of_unknown_function_DUF16|PF01519.14;Clathrin-binding_domain_of_Huntingtin-interacting_protein_1|PF16515.3;Centrosome_localisation_domain_of_Cep57|PF14073.4;TATA_element_modulatory_factor_1_TATA_binding|PF12325.6;Domain_of_unknown_function_(DUF4145)|PF13643.4;Ribonuclease_HII|PF01351.16;HAP1_N-terminal_conserved_region|PF04849.11;IncA_protein|PF04156.12;Fibrinogen_alpha/beta_chain_family|…	BAC25797.1	92.4	615
TRINITY_DN12203_c0_g1_i1	type:5prime_partial	393	ATTCTTCGAAAAGTCGTCGGGAAGACCAAAACTAAAAGTCATCAAGTCAGTCCACCTGTAGGCAAGGCGAGGACCAACGTGCAAACCCCTTTTCTGAAGAGAACAGTTTCGGAACCAGACTTAGCGGATAAGATACTTAATTCCAAGGACTTGCCCCTCCAACCATTTGACAAGCAAGAAACAAAGAAACCAGCCCGCCACGTTCCTCTCGAAGAAATGTTGAAGGATTCGAAGCCTGCCTATCGTAAGCAGCATCGCAGAGGCGTTTCCGAAGGCGGGTTCATTTATGGAAAACCAATGCAATTTCCACAAATCGAAAGCGATAAGAGTTCCTCAACTTCGTCGGCACGATTCACTGACGAAACAGAGGCAGAATACATACACATGAGTTAA	ILRKVVGKTKTKSHQVSPPVGKARTNVQTPFLKRTVSEPDLADKILNSKDLPLQPFDKQETKKPARHVPLEEMLKDSKPAYRKQHRRGVSEGGFIYGKPMQFPQIESDKSSSTSSARFTDETEAEYIHMS*	NA	NA	NA	188
TRINITY_DN12208_c0_g1_i1	type:internal	465	CATATTAAAGATGAAGAAGCTGAAAAAGATCCTCTCGGATGTGCTTATGTTCATTCTTTGCCTGAAATATATGATTATTCATCAGACAGTACCTGGAACCCTCAGTCAGATATCTCTAGTCAGTTAACTAAAAGCTTTAAGCTCAACAAGAATATGATTTTACTTACTCAAGCTGAAAAGAAACGTCTATATCGTTTGAGAATCAAGGAAGAAAATCCAGTTATGTGGTCAACTATTAAAAAAAGAGAAGCTGCGAGAAAAAGAGAGCAACGAGAAAAGAGAAGGCATATAATATTTGAAATGCAAAAAGCATTGGAACTATCAGAGTTACCTGAATCTCCTGAAGTTGTAAATCAAAAACTGTACTTAGAAAATCTAAAAGAAAGTTACCCTGAACTT…	HIKDEEAEKDPLGCAYVHSLPEIYDYSSDSTWNPQSDISSQLTKSFKLNKNMILLTQAEKKRLYRLRIKEENPVMWSTIKKREAARKREQREKRRHIIFEMQKALELSELPESPEVVNQKLYLENLKESYPELWSQLINALPATQMRNDQIGRAS	FmdE,_Molybdenum_formylmethanofuran_dehydrogenase_operon|PF02663.12;Ras-induced_vulval_development_antagonist|PF06047.9	NA	NA	235
TRINITY_DN12221_c0_g1_i1	type:internal	423	TTTACTTCTAAACGTGCACTAAATTCCAAATTTGCTGAAGAAACAGATATTCAGCACAATCAATTTAAACAAAATTTAAAAGAAGAAATATCTCATAAAAATGAATTAGATTCTGAATATGATAAATGGATCCAAAAGCAATCAGCTGCAGATGATAAACCTCAAATTCCTGTGAAATCAGCTAATATAAAAGAAGTGTTTATAAAAGTGCCAAAATTTGCAAAAGATACCATTGAACTTAAAGGAGAAAATTCAAAAAATGGGGAACAGTTTTATATTTATGATGATAAACATGGATATCAATATCCAGCAGGAAAAAATGTCAAAAGAAAAATTACCATCCCTGCAAAATTAAGGAAAGAAGGTAATATGTATAAAATTGGACAGTGTGTTTATGAT…	FTSKRALNSKFAEETDIQHNQFKQNLKEEISHKNELDSEYDKWIQKQSAADDKPQIPVKSANIKEVFIKVPKFAKDTIELKGENSKNGEQFYIYDDKHGYQYPAGKNVKRKITIPAKLRKEGNMYKIGQCVYDEDGELLYK	DnaA_N-terminal_domain|PF11638.6	NA	NA	385
TRINITY_DN12225_c0_g2_i1	type:5prime_partial	621	CGTGTGCTCTTCCCACCTGTTGAGTTTAGATCGTACCATTCATCTCCTGAAGTAAAAGGATTCAGAGCGATCTATAAATTTGTCACAGATTTTGGAATATATGCTGCACAAGATTCTACATCTGTCTGTGGATTCAATTTCAACAGCGAGGACAGGAGTAACGGGACATTTACGTCCCCTAACTTCCCAGGTCTCTACCCACGAAATACTGAATGTCACTACTTCTTTAAAGGGAAACCCAAGGAGAGAGTCCACATCACCTTCTACAAATTTGATGTTGACGGAATTCCACCGTGTAACTCAGACACTGCTAGTGACTATGTGGAGTTCTCCAACTACCGTACTGTGGACCGTAAGATCCCCCGTCACTGTGGCGTCAAGAAGCCTAAAGTCATCGAG…	RVLFPPVEFRSYHSSPEVKGFRAIYKFVTDFGIYAAQDSTSVCGFNFNSEDRSNGTFTSPNFPGLYPRNTECHYFFKGKPKERVHITFYKFDVDGIPPCNSDTASDYVEFSNYRTVDRKIPRHCGVKKPKVIESDGDFFRVTFKSNNKFDGTGFEALYQFKPYIDPATVKRISSNSTANTSSDTTDRTYTFLFTLVSLVMMLMINV*	CUB_domain|PF00431.18;Sieve_element_occlusion_N-terminus|PF14576.4	XP_001658017.1	166.4	110
TRINITY_DN12229_c0_g1_i1	type:internal	495	CTTGACCCTCAGCAACTGATGGAGATCCTCGGAAACTTTTACAACCCAGAACTGATGTCTGTGGAAGAACCATCAGTATTGGCCAATAAGGATCCAGATCGTGGAGCTTCGTACGTCATCAGACACGATAATTGGCAACACGCGGACCTAATAAAGCAACTGCAAGCTACCAATTTGAGCATGGAGTTGGCTCAGCTGGGAGGATCCAAGATTCTGGAGGAACCAGTGTTCGCGAAGACTGTAGAGAAGTGGCTACTAAAGAGGACCGCATGTCCAGTCAGATATGCGTGGGAAGATATTGGCAGTCTTTTCTGGCCTCGCTACATCAAGCGAGGAGAGTGTGCAAGTGTTCCTGGTACTTGCTCCTGGCCTCCTGGTATGCATTGTGTACCATCCGGT…	LDPQQLMEILGNFYNPELMSVEEPSVLANKDPDRGASYVIRHDNWQHADLIKQLQATNLSMELAQLGGSKILEEPVFAKTVEKWLLKRTACPVRYAWEDIGSLFWPRYIKRGECASVPGTCSWPPGMHCVPSGTTTLHILRWQCKVPKGKSRRKNFKNLKDSKNK	Noggin|PF05806.10	AAM34779.1	79.7	133
TRINITY_DN12232_c0_g1_i1	type:complete	480	ATGTCTGTTTTTGTTTCTGTGGGTTCTACCTCATTTGATGATCTCATCAAAACAGTTAGTTCACCAGAAATTCTTCAATTTCTTTCTGATAAGGAATTTAAAAAGATCATTTTGCAGATTGGACAAGGGACTGTAATACCAGATAAAAGTGATATCATTGAAGTTGAGTGGTTTCGCTTTAAAGATAGTATTTCCCAAGATATCAAGAATGCATCCCTTATTATTGGACATGCTGGAGCAGGCACAATTTTAGAATCCTTAATTGAACATAAACCACTCATTACTGTTTTGAATGATAAATTGATGGACAACCATCAGACTGAACTTGCTGAAGAAATGGCAAAAGAAGGTTATCTTTCTTATTGTTCTTGTTCAGATTTGTTAGAAACTTTAAAGCGT…	MSVFVSVGSTSFDDLIKTVSSPEILQFLSDKEFKKIILQIGQGTVIPDKSDIIEVEWFRFKDSISQDIKNASLIIGHAGAGTILESLIEHKPLITVLNDKLMDNHQTELAEEMAKEGYLSYCSCSDLLETLKRSKSFTSFTSEPNMFPAFLEELMGFSV*	Glycosyltransferase_family_28_C-terminal_domain|PF04101.14	NP_796104.2	136.3	1243
TRINITY_DN12233_c0_g1_i1	type:internal	552	TGCTCTTCCGATCTGCCTTTGGTTCCATCGCAGCCAGTTGCTCAGGACCCTTCAATGCCTGCACTTCCTCCACCAGATACTACAACAAATCTCCTGGAAGCGCGACGCAGATTGGAGGATGAAAGCCGAACAAAAATGGGAAAATCGAAATATTGTGGTGGTCGATATACTCATGATGTTACAAAGTTCAGAAATTCATTTAGAGCTTGTAATTCAGATGATGGCAGTTCACACAGGAAACAAAGTAAGAAATCTGTTCCTGTTAATGCTGTAGATAATGTCATTTCAAGTACTGGAGGTAGCGATATGACAGTTGTTGGTTATATTTATGATCGAGACACAGTGCCTTATAAATCTCGACTTCCTGGGAAAAATATTACTTTGAAGCAATTTAAATCT…	CSSDLPLVPSQPVAQDPSMPALPPPDTTTNLLEARRRLEDESRTKMGKSKYCGGRYTHDVTKFRNSFRACNSDDGSSHRKQSKKSVPVNAVDNVISSTGGSDMTVVGYIYDRDTVPYKSRLPGKNITLKQFKSHLNKKGNYRYFFKRFSNDFGTGVVYEEVTDDYEVLPLWEGKIFCSIETLEE	Domain_of_unknown_function_(DUF4251)|PF14059.4;DIX_domain|PF00778.15	AAT79418.1	44.3	298
TRINITY_DN12242_c0_g2_i1	type:internal	615	GAAAAGCAACAAATTGTACACCAGTGGAAACAAAGTTTAGCATCTTTGGAAAAACAAGATCGTATTTTGTCTGAAATAAGGGATTCTGTAAGAAAATATGAAGATGATGCATCCACCCTTAATATGGATATATTTGCATCTAAGAAATCAGTGAGAAAGGAATTAGAAAGAAATGAACAACTTCTTATTCAACTTCAATTTAGAGAATCAGATATTGCTCGAGTTGAAAAGGAATTACTGCAAATGTCAGAACGTCAAAATGATTTAGAAGAAAACATTACTGTTTTGGATAAAACAATAGAAATTACTGAGCAAGAGTTAAAAAGTTTAAATGAAAACAAAACGGTTATTGAGAAAAAACTGAATGCAAAAGACAGAGAATTGCAGAAAGCTTATGGG…	EKQQIVHQWKQSLASLEKQDRILSEIRDSVRKYEDDASTLNMDIFASKKSVRKELERNEQLLIQLQFRESDIARVEKELLQMSERQNDLEENITVLDKTIEITEQELKSLNENKTVIEKKLNAKDRELQKAYGYQKSLEKKHMDMLHDKMTITKASKYTEKLIRDIKNSIRLNEDKGSKKENEKEKLFLKLDNLRTYMNNMENTF	Nsp1-like_C-terminal_region|PF05064.11;Laminin_Domain_II|PF06009.10;V-type_ATPase_116kDa_subunit_family|PF01496.17;Protein_of_unknown_function_(DUF1664)|PF07889.10;Saccharopine_dehydrogenase_NADP_binding_domain|PF03435.16;Reovirus_sigma_C_capsid_protein|PF04582.10;Ion_transport_protein_N-terminal|PF08412.8	NA	NA	150
TRINITY_DN12251_c0_g1_i1	type:complete	1236	ATGAGTGAGAGAGAATTTAAAAATTCATATCCAGATTACAATGAGAGCCTCAAAATTTTTGATCCAGACACTGGAAGGTTGATCAACGAAATTGAAGGCCCTTTGATGGAAAATGTGTTCATTTTACTTCAGACATTGGAGAAGCATCTTGCAACAGACATTGATTGGTCGGATTCCAGTGTTTATACAGGAACTTCTGGTATCGCCCTTCTTTATCTCCGTTTTCTTGATGTGAAACTGTGTGAAGGCAAGAAGGACTTCTTGAAAGATGCCCTCTCCTATGTTGAACCTGTCATCCCGTATCTCAAGAAGAAACGTTTCTCATTCTTGTGTGGGGTGCCTGGTCCTCTGGCCATTGCTTCAGTCCTATTCCACAGGAAGGGGCTTGAAAAGGAGAGC…	MSEREFKNSYPDYNESLKIFDPDTGRLINEIEGPLMENVFILLQTLEKHLATDIDWSDSSVYTGTSGIALLYLRFLDVKLCEGKKDFLKDALSYVEPVIPYLKKKRFSFLCGVPGPLAIASVLFHRKGLEKESTDLARRLENLERDVCAYSSECPDELLYGRAGYLFSLLFLEKHLPAEEDDEVRQDIIKEVIKAILESGQYMSKKFKNTHGIPLFYEWHDKAYIGAAHGFSGILYMLLQAKKFLTEEQLDTLIRPTIDFIVSIQYPSGNFPSSIGSPTDRLVHWCHGAPGVVHLLLLAHETFPGESKYLESARRCSDVIWQRGLLKKGYGICHGVSGNGYAQLRLFQVTREAKYLYRAVKFAEWCFDYGKHGCRTPDRPLSLFEGFAGTIYFLLDLLE…	Lanthionine_synthetase_C-like_protein|PF05147.11;Integrator_complex_subunit_3|PF10189.7	XP_418874.2	393.3	7930
TRINITY_DN12253_c0_g1_i1	type:internal	348	AAACATGGTAGAATGGCAGAAGCGAAGGTCGACGAAAAGCCGGACTGCACTTTGCCGGAAAACGATTCATGCCCCGGGACCGGCCAAAAGTCCAAGCAGCACTCGCCTCTCCGTCGCGGCTTGACCCGCATGTCCAAGTGGGTTCACGCTGCGCGTAGATCCCTGAGTTCTGGAGAAGAAAGTAACATGGGCCACGGGATATCGAGTCCGGCAACTCGAAGGTCCGACCCGCCGAAAGAATCGGCATGCGGTGTTCAAGCGGAAACTTCGGGTCCGACAGTGGAAGAATTGCAAGATGAAGTAGAATCTCTGAAGCAGTTAGTTGAAGAAAAAGAAAAAATAATTGCC	KHGRMAEAKVDEKPDCTLPENDSCPGTGQKSKQHSPLRRGLTRMSKWVHAARRSLSSGEESNMGHGISSPATRRSDPPKESACGVQAETSGPTVEELQDEVESLKQLVEEKEKIIA	NA	NA	NA	46
TRINITY_DN12254_c0_g1_i1	type:5prime_partial	1500	ACTGGAAGTATTATTTTAAAATGCAAGGATTTTAGAATTCTTCAGTTGGATATACAAGGTGTTGAAGATTGTAATAATGTTGCAAGCTCTATTGAATTTTTGATGAATTTAGATACTCCAACACAGTTTTATCCATTCTTTCATCGGGCCATGTTTGACATGCTGGAAGATGGTTGGACTTCATTTTTACCTGAGACAGAATATGCCAAAGTTCTTCAAAATAAAGATGAATGGAGGATCAGTCATGTCAATAAAGATTACATGATATGTCCCACATATCCTCAACTTGTGATTGTACCCAAATCCATTGATGATGATACTCTTAAAACTGTAGCTGGATTTCGACAGTTTGGTAGATTTCCGATTTTGAGTTATTATCATAAGGATAATAAGGCAGCC…	TGSIILKCKDFRILQLDIQGVEDCNNVASSIEFLMNLDTPTQFYPFFHRAMFDMLEDGWTSFLPETEYAKVLQNKDEWRISHVNKDYMICPTYPQLVIVPKSIDDDTLKTVAGFRQFGRFPILSYYHKDNKAALLRSSQPMTGANNRRCKEDERLLNVVLGSGKKGYIIDTRSQNIALLARTKGGGFEPDVHYPLWKRMHKPIDRYFNLLESLTKVIEACNDTNCSVDKWLSRLESSGWLTNVKDVLTCACLVAQCLDQEGSSVLVHGAEGTDATLTVCALTQIIINPDCRTVHGFEALIEREFIQAGHPFSTRCQCSAYASINSRSKDQSPTFLMFLDCVYQIHQQFPCSFEFNEQFLVTLFEHAYASQFGTFLGNCDKDRSDWKLAERTVSLWSMLN…	Myotubularin-associated_protein|PF12578.6;Haloacid_dehalogenase-like_hydrolase|PF13344.4;Myotubularin-like_phosphatase_domain|PF06602.12	NP_001094657.1	612.1	1005
TRINITY_DN12257_c0_g1_i1	type:complete	459	ATGAAATCTTTAGTAATTTTGCTGTCATGCTTGTTGCCAGTAGTCTTGTGTTGGGAATTCCCAGGATACCCTGGTGTTGATTGCCCAACTGCCCGAGAAAGGATGGCTCAAGACCCAGAGAACCAATGGATGCTTCCAAAATGCAACAAGGATGGCACCTTCCAAGATCTGCAATGCTATGACCAGTACCCAGATGTCCCTGACACTTGCATGTGCACTGCCCTTGATGGATCTCCTCTTACATTACCAGGATTTGGTTTGAATATCAAAACCTGCGTCTGCCTTCTTGCTCAGTACAAGATTTTTGAACATGATCACGATGCTGAGTTGCCCAAGTGCGAGAAAGATGGCTCTTACGCTCCTCTCCAGTGCAGTGAAATTACTAAGGAGTGCTGGTGT…	MKSLVILLSCLLPVVLCWEFPGYPGVDCPTARERMAQDPENQWMLPKCNKDGTFQDLQCYDQYPDVPDTCMCTALDGSPLTLPGFGLNIKTCVCLLAQYKIFEHDHDAELPKCEKDGSYAPLQCSEITKECWCVDRNGTVLVPPSTDVHSCD*	Thyroglobulin_type-1_repeat|PF00086.16	NA	NA	39586
TRINITY_DN12267_c0_g2_i1	type:5prime_partial	888	CTAGAAATGAGCTCAAAAGTTAAATCTTCAGTTACAAATGATGGTTTCATTGTTGAAAGTTCCACCACTGAAAAACAAACTTTGAAAGATAGATTGGTAAATGAGAATAAACCAGTTTTAAGTAGCCTTGAACTGAAAGGAGCTTTAGACTTGAAACATATAGACAGTCGAAGTGAAGATGATGTTGAGATAATTGAATCTACAGTCTCAATGAAAAACCTTGATATATCTAGTGAATTAAATTTTGATAATGAAATATACATATCTGCTGATGATAACTGTGATCCTCCTGAATCGGATCCAGAGAGGCGCCCAAGCTCCATCCTTAGAAAGAAAATCTCAGAGAGAAAGGAGCTGCATGGTATCTTGAAACCCTCTTCAGATGAAAAGCAGTCTAAG…	LEMSSKVKSSVTNDGFIVESSTTEKQTLKDRLVNENKPVLSSLELKGALDLKHIDSRSEDDVEIIESTVSMKNLDISSELNFDNEIYISADDNCDPPESDPERRPSSILRKKISERKELHGILKPSSDEKQSKTPPSILKHRESSEEKDVWQQGDLHSILKKSTSEDESYTSGPDIRPILKVSTDDESPTCSMMRPRPILKKRTSFSEECSYASYPNGELKPILKKKSPLASDDQPRPILKSRRKSEDARSTMFEFIASRPRAYSADMGVKPNLENRFDPSESNKEDPSKSEHNL*	Tenuivirus_PVC2_protein|PF06656.9;Protein_of_unknown_function_(DUF968)|PF06147.9	NA	NA	636
TRINITY_DN12281_c0_g2_i1	type:5prime_partial	525	TTGGAACCCCGAGTTGCCACTAGATGGGATATTCAAAAATATGCCAGAGAGGCCTACAACCTGGGGGTTAGGTACATTGGCGGCTGCTGCGGATTTGAGCCCTACCACATCAGGGCGATTGCAGAGGAGTTGGCCCCAGAAAGGGGATTTTTGCCACCGGCTTCAGAAAAACATGGCAGCTGGGGAAGTGGTTTGGACATGCACACCAAACCCTGGATCAGAGCAAGGGCCAGAAAGGAATACTGGCAGAATCTGCGAATAGCTTCCGGCAGGCCGTACAACCCTTCCATGTCCCGGCCAGATGCTTGGGGCGTGACTAAGGGAGCAGCCGAGCTGATGCAGCAGAAGGAGGCCACTACTGAGCAGCAGCTGAGAGAGCTCTTTGAAAAACAAAATTCA…	LEPRVATRWDIQKYAREAYNLGVRYIGGCCGFEPYHIRAIAEELAPERGFLPPASEKHGSWGSGLDMHTKPWIRARARKEYWQNLRIASGRPYNPSMSRPDAWGVTKGAAELMQQKEATTEQQLRELFEKQNSSLHSSHRQQFGVNPSMPGPQCVPGRKRWLKVSVCVNTSLHL*	XRCC1_N_terminal_domain|PF01834.14;Homocysteine_S-methyltransferase|PF02574.14	EAW95832.1	272.7	276
TRINITY_DN12290_c0_g2_i1	type:internal	366	CAGCATAATGGTTCCTTATTGCTTGTTGGAATGAATGGTTCTGGACGTCGTTTATCTGTTTCAGTTGTTGCCCATGCACATCAAATTCCAATTATTTCTCCCAAAATTCATCCAAATTATGGAATAAAACAATTTTCTAATGATTTAAAAATGGCATTGCAACTAACAGGAATTGAGGGCAAAGAAGCTTTGTTACTGCTAGAAGACTACCAAATACTTGATGATGAATTTCTTGAGTTAGTTGATAGCCTTTTATCTTCTGGAGATGTTCCAGGTCTTTATACTCCTCAAGAACTGGAACCACTTTTAAATCCTCTGAAAGATTTAGCCTCTCAAGAAGGATTTCGTGGATCTGCTTCAGCTTTC	QHNGSLLLVGMNGSGRRLSVSVVAHAHQIPIISPKIHPNYGIKQFSNDLKMALQLTGIEGKEALLLLEDYQILDDEFLELVDSLLSSGDVPGLYTPQELEPLLNPLKDLASQEGFRGSASAF	P-loop_containing_dynein_motor_region_D4|PF12780.5;AAA_ATPase_domain|PF13191.4;HAUS_augmin-like_complex_subunit_4|PF14735.4	Q27802.2	149.1	76
TRINITY_DN12291_c0_g2_i1	type:internal	534	AGGGAAAGAAATGCTCTGACCTTTTATCCTTACTGGAATTCCAAATTTCAGAAATCTTATGGTTCTAGTCCTTATAATTTGGTGACAATGAATTTCACCAAGTTGTTAAATGATCATATGAACAGTGAAAATCCTTTTTCTTTAATTGAGAAAAAAGTTGTGATTCATGAAAGAAATGTCATCAAAGAAGTGTTGTGGATGCTATGCGGTGTGAAATCATTGTTTATTGCCTATTGGGATGGTCAAAAGTTTGAACCCAATCCGCAAATTCACCTCACCAATTTAACCTCAAAAACTTTATATATTGTTCTGAGGGAATTTTGTGCATATGCCACTAAACAAATTGTACTTGAAGATTTTTTCCGCAAAACTTTGTTGGATGCTTCACAGTGCTGCCGC…	RERNALTFYPYWNSKFQKSYGSSPYNLVTMNFTKLLNDHMNSENPFSLIEKKVVIHERNVIKEVLWMLCGVKSLFIAYWDGQKFEPNPQIHLTNLTSKTLYIVLREFCAYATKQIVLEDFFRKTLLDASQCCRTYNAYIESMQEFLQKVRNAISSLDAQLRKGEEIFTFMNLQRKLKS	Spc97_/_Spc98_family|PF04130.11	NA	NA	75
TRINITY_DN12295_c0_g1_i1	type:5prime_partial	366	ATCAATGGTTATAAAGTTATCTTCGATGTCAAAAGCCGAGGTCTCAAGCACATACGATACTGTACACCGGCATATCTTTATCTCTTATATACCGGTACTCAAGAATGCTTTCCAGGCAGGTTTAAAGAAATTCACATTCTGAACATGTCTTTGACTTTTCAATTAGCATGGAAATTAATTAGTCCTTTCCTGTCTGAGAAATTAAAGAAAAGAATAGTATTTCACGATGACTACAAAGATCTCAACAAATATTTTCCTACAAGTATCATCCCAGTTGATTTGGATGGTGAATTAAAAGAATGCGACACCATTCCTTGGTTGAAAACTGCAACACGTCCTGAAAATTTGCAGAAACTCGCTCACTAA	INGYKVIFDVKSRGLKHIRYCTPAYLYLLYTGTQECFPGRFKEIHILNMSLTFQLAWKLISPFLSEKLKKRIVFHDDYKDLNKYFPTSIIPVDLDGELKECDTIPWLKTATRPENLQKLAH*	Divergent_CRAL/TRIO_domain|PF13716.4;CRAL/TRIO_domain|PF00650.18	XP_001653039.1	63.9	188
TRINITY_DN12301_c0_g1_i2	type:internal	483	CCAGCTGTCCCCTACGTCAGCCGACCAGCAGTCGTCGCAGCTGCCCCAAGGATTGAAAAGCAACAAATTATCTCAGTGAAGAGTCCTGTTGTGAAAACCTCGTATGGAACCCCTCACATAAGTTTCACTATGGGCCATGGCAAGACAGCAGCCCATGGGGGAGTTTCATCAGGCCACTTTGGGGATTCATTCAACACGCACAAAACCACAAACCACCATTCTTCTAGTTCTGACTCCCGCAAAGGCTCAGGAATCGGATTTTATGGACTCGATGCTTCAAGGAGCGGAGTTCCCGGCGATTCTAGACCTAAACCCAGTGTTACCTACTCCGCCAACAAACCCGGAGGTTCAACCTTTTCATCTCCAGACTTCGGTACAGACGCCTTCGCTGAAGATAAG…	PAVPYVSRPAVVAAAPRIEKQQIISVKSPVVKTSYGTPHISFTMGHGKTAAHGGVSSGHFGDSFNTHKTTNHHSSSSDSRKGSGIGFYGLDASRSGVPGDSRPKPSVTYSANKPGGSTFSSPDFGTDAFAEDKNTEFDFPESDKPITSADKPRSTTFSEIG	NA	NA	NA	223
TRINITY_DN12316_c0_g1_i1	type:internal	687	GAAAAGCTGAAAAACAATACTATATTGGTTGTTCTTGGTGATCATGGCATGACTGAAAGTGGTGACCATGGAGGTGACAGTGTTCCTGAAGTATCAACTGCGTTATTCTTTTATAGTCGGAATAAATTAACCACCAAAAAGTTTATTAACAGTGCACCAACAGTTGCTCAGGTGGATATTGTTCCTACATTATCTCTTCTATTAGGACTTCCAATCCCCTTTTCAAATTTGGGCAAGGTCGTAACTCCGTTATTCACTTTAAATTTTAAAGATACCTGCTTTGATGAAGAAACAGATGCAGCAATTGCATCAGCTATATCAAGTTCAGAAAATGCAATGCAGATTCAAAGATATCTCCATGCATACAGACAAATGTCTAATGAGTTAACAGACATTTTT…	EKLKNNTILVVLGDHGMTESGDHGGDSVPEVSTALFFYSRNKLTTKKFINSAPTVAQVDIVPTLSLLLGLPIPFSNLGKVVTPLFTLNFKDTCFDEETDAAIASAISSSENAMQIQRYLHAYRQMSNELTDIFVTKMKNQLKDLSQFWSKITNNITESKNILFSISEGYKSYMENVHNTCSQKWAMFNLQYIVLGIFVLCFTVFWNLWMSEKFSHMESIFIFIFIILLC	Sulfatase|PF00884.21;Domain_of_unknown_function_(DUF4047)|PF13256.4;Predicted_membrane_protein_(DUF2207)|PF09972.7	NP_001085798.1	27.3	399
TRINITY_DN12318_c0_g1_i2	type:internal	792	TTTTTAAATACTATACCAAATACATGCTTTATTAGACTTGTTAGTAGTGTACCTAAAAAACCAGTTCCAAAAGAATTGAGAAGATTGTTAAAAGTTGCTCAGAGCCAGAAATGGAAACTTACAGGTGCTGTTTTACTCTTATTTGTTTCCAGTACTGTTACAATGGCTGTTCCATTTTGTGTGGGAAAATTGATTGACATGATGACTTCTTCTAGGGATGATCTGCAAAAAAGTCTTATATCATTTTGTAAAATATTAGTAGTAATTTTTATTATTGGTGGCTTGGCCAATTTTGGACGAGTTTACTTGATGAACATTTCATCTCATCAAGTGACAAATGCTTTGAGAAGGAAAGTTTATGGATCAATTTTATGTCAGGAAGCTGCTTTTTTTGACCAT…	FLNTIPNTCFIRLVSSVPKKPVPKELRRLLKVAQSQKWKLTGAVLLLFVSSTVTMAVPFCVGKLIDMMTSSRDDLQKSLISFCKILVVIFIIGGLANFGRVYLMNISSHQVTNALRRKVYGSILCQEAAFFDHTKTGELINRISADTTTVGMSITNNISDGLRYSFVFTAASCLMVYTSPTLAAVGLITVAPVAIVAAVAGNILKRNSKAVQDALAEATQVSEERISNIRTVQAFARLEEENQTYSNKINDVLHFAYKESLGRA	Predicted_membrane_protein_(DUF2207)|PF09972.7;Transmembrane_exosortase_(Exosortase_EpsH)|PF09721.8;Putative_Actinobacterial_Holin-X,_holin_superfamily_III|PF07332.9;Phospholamban|PF04272.12;ABC_transporter_transmembrane_region|PF00664.21	XP_008192747.1	224.2	157
TRINITY_DN12331_c0_g1_i1	type:complete	858	ATGGAGCAATCAGATAAAGATACTACAGCTGAATCTTCAGGAGATGATCTGAGCAAACTGCTGGACAGTTGCTTAGATGACTTTAATAAGCCTTTGCCTATACCTCCTCCAGCAAGTGCTCAATCTAAGAAAGTCAGTACAACATCAGAAGCAAAAAGCTCTTCAGTTGATAGTGCCAAACCTCCTGAAAGTGCTGCTTGGGGAGAGGAGTTTAAAGAATTCAGTGACGTTATGGAAAATTTCATCACAGATGAATCAGAGCTGAACGAGATTAAAAAATTGATGAGCAGTTGTCTGTCACAGGAAGGCCCTCCCATTGATGATGAGAATTTTGCCAAATCATTTGCAGATACCATTCAGGAACTGACACAACAAGCTCAGAACATTCCAGAAACTTCA…	MEQSDKDTTAESSGDDLSKLLDSCLDDFNKPLPIPPPASAQSKKVSTTSEAKSSSVDSAKPPESAAWGEEFKEFSDVMENFITDESELNEIKKLMSSCLSQEGPPIDDENFAKSFADTIQELTQQAQNIPETSPEDLANLLSGLGMGGDGNNPDVENLPEIMPLMQSVMQRLMSKELLYPSIKEIVEKYPGWLNEQKSTLKTEEYDNYQKQFEIMKEICDEFEKEIASSENAKKEQFEKVLQLMQKVQSYGNPPKELVSTINPGVPVDGEGNLQIPGMPEQCVIM*	CRISPR-associated_(Cas)_DxTHG_family|PF09455.8;Pex19_protein_family|PF04614.10;UvrD-like_helicase_C-terminal_domain|PF13361.4;PRD_domain|PF00874.18;Inhibitor_of_growth_proteins_N-terminal_histone-binding|PF12998.5;MSP7-like_protein_C-terminal_domain|PF12948.5;Flagellar_FliJ_protein|PF02050.14;Flagellar_hook-associated_protein_2_C-terminus|PF07195.10;Protein_of_unknown_function_(DUF445)|PF04286.10…	NP_001089075.1	135.6	8599
TRINITY_DN12342_c0_g1_i1	type:complete	1275	ATGGCATCTCTTAGTAGAATTGTAAAGCACGGTTCCAATCTTTGTAATGTCCTTGAACGCAAGCTTCCATCAACAGTTGTGTCTCTACGCCATTTAAACTTACAAGAATATCAAAGTAAAAAATTAATGCAAGATCATGGCATAAATGTGCAAAATTTTAGAATAGCAACCAACGTAAATGAAGCAGAAGAAGTTGCTCATTCATTTCATGTTGATGAATATGTAATCAAAGCTCAAATTTTAGCTGGAGGACGTGGTAAAGGTACTTTTTCGAGTGGTTTAGTAGGGGGAGTTCAGCTGACCAAAGATCCAAAAGAAGTTCCTAAATTTGCTAACGGTATGCTGGGATATAATCTTGTTACCAAACAAACTGGAAAAGATGGTGTTAAAGTCAATAAA…	MASLSRIVKHGSNLCNVLERKLPSTVVSLRHLNLQEYQSKKLMQDHGINVQNFRIATNVNEAEEVAHSFHVDEYVIKAQILAGGRGKGTFSSGLVGGVQLTKDPKEVPKFANGMLGYNLVTKQTGKDGVKVNKIMIAEAVDIARETYLAILMDRESGGPVIVASPAGGVDIEQVAKETPDLIYKEVIDITRGISDSQARSIAQKLKFEKDLLHEAAQQIKKLYEIFIKVDATQIEINPFGETKDHRVLCFDAKFNFDDNAEFRQKKIFEMDDHSESDPREVDAAKYHLNYIGMDGNIACMVNGAGLAMATMDIIHIYGGKPANFLDVGGMVQEEQVYQAFRILTSDSNVKAILVNIFGGIVNCAIIAKGITNACQNIQLKVPLIVRLEGTNVDEAKIIL…	ATP-grasp_domain|PF08442.8;ATP_citrate_lyase_citrate-binding|PF16114.3;ATP-grasp_domain|PF13549.4;Phosphoribosylglycinamide_synthetase,_ATP-grasp_(A)_domain|PF01071.17;CoA-ligase|PF00549.17	NP_001094220.1	542.7	8803
TRINITY_DN12346_c0_g1_i1	type:internal	333	CGATTGTGCAAAAAGTTTGTACATGTTCTTGTACTTATCAGTTGTAAGGACATCGGGTTTGCGATTCTTGCAAACTTGAACGTTGGTGGTACTACCAATCTACGGTTGTACTTCGGCTACAATCCATCTGATGTTGATACCACGATACAGAAGGTTGCCGTCCCCAGTGGCGTAATGAATAATATTAGGGCTCCCCTGAAAAGCCAGATTTTGTGCCGCAAGCAAGATCTTACAAAGGGTGTGCACTATACACCAGTCAGACTTTGGGCCCCCGAGATTCCTATCCCCCCGCAATGCGGGTGTTCCGGGGTTATATGTTACGCCATTGACCGT	RLCKKFVHVLVLISCKDIGFAILANLNVGGTTNLRLYFGYNPSDVDTTIQKVAVPSGVMNNIRAPLKSQILCRKQDLTKGVHYTPVRLWAPEIPIPPQCGCSGVICYAIDR	NA	NA	NA	138
TRINITY_DN12359_c0_g1_i1	type:5prime_partial	729	TTTACTGTTACCCTTGTAGCTATTCCATTCTCAGCATGTCAACCAGGTGATCCCGGGAATTTGCTATATGCATCATGGATGGTTCATCATATTATATCAAGGATATTTGGTTTAAAATGGGAAGTGAAGAATAAAGAACTTTTGAATTCCAAGGAACCTTGTGTCTTGGTTTGTAACCATCAAAGTGCTTTAGATATAAGTGGAATGATGTACATTTGGCCTCTTTTTCACCCATGTGTACCAGTTCTGAAAAAGGAACTTCTTTTCACAGGCCCATTTGGTATTTTTTGCTGGCTTGCAGGATGTATTTTTGTTGACAGATTTAACTCAGAGAAGGCTCGAGATACTCTGAATAATAAAGTTAAAGAATTGAAAGAAAGAAAAGTAAAATTGTGGATT…	FTVTLVAIPFSACQPGDPGNLLYASWMVHHIISRIFGLKWEVKNKELLNSKEPCVLVCNHQSALDISGMMYIWPLFHPCVPVLKKELLFTGPFGIFCWLAGCIFVDRFNSEKARDTLNNKVKELKERKVKLWIFPEGTRNDSGTLLPFKKGAFHIATQAKIPIVPIVFSEYTDFYSIGKKIFDRGTITVTVLPWIKTEHLTSVDVPSLTEEVRSIMMSSLKLSATEASEKKSNGSVIEKKSQ*	Acyltransferase|PF01553.19	XP_001657726.1	209.1	218
TRINITY_DN12365_c0_g1_i1	type:internal	537	TTCCGAGGACATGTAAACATGTTATTAATTTCAGCTAAAAAGACATCTTCCGCTATTCATCCAACTATGCCACTTCATAAGCATTCTGTCTCGTATTTCCTTATTGCTGTTCATCTAATTCTATGTCCTTGTTACGGTTTAACATCAATAAATGCTACTAATGACATGCTTTGTGAAAAGTATAATGAGACTATGTGTAATAGCAACAGTAATGGTGAAGGCTGTAATGGAACTGAAGAATGTAAACCTGGAGAAAATGAAAAAGGAAACTTGTGTTATGTGTTATGGCAGAATAATAGTAGATCTTTTACTATCAAACTCAAAGGCTGTTGGGTTGGCAGTCATGATGCTTGCAGTAATAGGAACCGATGTATGGAGACCAGACGAGAACCTAATGTA…	FRGHVNMLLISAKKTSSAIHPTMPLHKHSVSYFLIAVHLILCPCYGLTSINATNDMLCEKYNETMCNSNSNGEGCNGTEECKPGENEKGNLCYVLWQNNSRSFTIKLKGCWVGSHDACSNRNRCMETRREPNVQLLFCCCEGSMCNRKMTIPSNVFAPTPAAAKTSTAAPIRMASSSRQ	NA	BAF91266.1	75.5	238
TRINITY_DN12373_c0_g1_i1	type:internal	495	CCTTTAAGAGAGCGTCCTGGTCAACCTACTTCTTATAGACCACATAATTCCGTTAGAGTGTTTTTAGGTATTCCTTATGCAGAACCACCTACTAGAAGAAATGATGTCACATATCAACTAAAGCCACCCAAAGTCAGAGAAGAATTTCGGAATCGAGATACGTTTAGTTATAGTAAGTCATGTCCTCAGAATGAGAAGTACATTAGAAAAGGTAGAGGCATAAACACTACTGATGAAGATTGTTTATATCTTAACATTTTCAGTCCTGGACCTGTACAGCTTGAAAAACCTGTGCAAGATAAATATCCTGTAATGTTTTACATTCATGGAGGTAATTTCGACCATGGTGGTGGAGCACTTTTTCCTGGTCATATGTTAGCTGCTTCACAGAGAGTTGTT…	PLRERPGQPTSYRPHNSVRVFLGIPYAEPPTRRNDVTYQLKPPKVREEFRNRDTFSYSKSCPQNEKYIRKGRGINTTDEDCLYLNIFSPGPVQLEKPVQDKYPVMFYIHGGNFDHGGGALFPGHMLAASQRVVVVTFNYRLGYLGFLATGDTNSPGNYGILDQIA	Carboxylesterase_family|PF00135.26	XP_001659685.1	159.1	132
TRINITY_DN12383_c0_g2_i1	type:3prime_partial	987	ATGTTATCAAAGTTTTGTTGTCTTGTTAAACTTTCATTGCAAAAACGTAAGATAATATTACATAATTCATCTTTTGAATGTCTTCTGAAAATGATGATATCTGCTGTCCATTCTTCTGCAGAATGGGTTTTAAATGATGTTCTGCAGACCATATCTGCATTAATTGAAACCAATGTTGAGCAAGTGACAAAATTTTGTGATGATTTCATTGGAAAAAATGGAGTTCTTACTAAATTTTTACTCCCAAGCAATCATGAAAAATCAATTATATTTGATGCTTATCAGTGCTTACTGAGTTTGATAAAAAATCTTTGTGAAAATGGATATCATGGAGAAGCATTTGACTTTTGTTTCCAAAAATGTTTTTTAGTGATAAAGGACAAATTTATGTGTAGTGTT…	MLSKFCCLVKLSLQKRKIILHNSSFECLLKMMISAVHSSAEWVLNDVLQTISALIETNVEQVTKFCDDFIGKNGVLTKFLLPSNHEKSIIFDAYQCLLSLIKNLCENGYHGEAFDFCFQKCFLVIKDKFMCSVTDIMILKIVLSSLKCLQYAFISKNLKIENFGELLGTLKNFLFYGLPGQTFNSDINLYPTLRYPPDGPHNQESQSESDSPHPKLRKQKKSKRRLKKASNKRQFHNETEVDEGSDYMTTDLSENLASVSLSSSSKIIFETKVRNSSSDSEISDAENYISQLKPLQVAIRRNAYLALLNVIKITDKKVMFGFWSYFLPE	SWIRM-associated_domain_at_the_N-terminal|PF16496.3;Domain_of_unknown_function_(DUF4042)|PF13251.4	NP_001107785.1	33.9	481
TRINITY_DN12384_c0_g1_i1	type:complete	366	ATGAAGATGAAATTGAAAAGGAGAAGTCACAAAAACCCCTCATACACATTAACAAATAGTGAAATCTGCAAAAATAATAATTGGTGCTACAACAAGTTTTACAGATATGAAAGCATTGTTCGCCTTATAGCATGGATTCTCCGATTTAAACAAAACTGTGTGAGAGCAAAAGAAAAAAGATACGGAGAATTGGTTGCATCAGAATTCCAGGAAGCTGAAGAGACACTAATAAACTTGATTCAAAATGAGTGTTTTTCATCTGAGAGTGATGATCGACTTAAAGCTCTGCGAGCATTTAAAGATGAGAAAGGCATCCTCCGATTAAAGACAAAATTACCAACAGGAAAGATAATGATACATTTTTGA	MKMKLKRRSHKNPSYTLTNSEICKNNNWCYNKFYRYESIVRLIAWILRFKQNCVRAKEKRYGELVASEFQEAEETLINLIQNECFSSESDDRLKALRAFKDEKGILRLKTKLPTGKIMIHF*	NA	NA	NA	63
TRINITY_DN12389_c0_g2_i1	type:internal	321	AGGGCCCCATGCTGGAAAGCTGGTCGCAATTTAGATGTCATTGATCAGAACAGGGCTTTAGTGGATGGACCCTGTACTCGGGTGAGGAGGCAGGCCATGCCCTTCAAATGCATGCAGCTCACTGACTTCATCCTCAAGTTCCCACACAGTGCCCGCCAGAAGTATGTCCGAAAAGCTTGGGAGAAGGCGGATATCAATACGAAATGGGCAGCCACAAGATGGGCCAAGAAAATTGATGCCAGAGAAAGGAAAGCCAAGATGACAGACTTTGATCGTTTCAAGGTCATGAAGGCAAAGAAAATGAGGAACAGAATAATCAAG	RAPCWKAGRNLDVIDQNRALVDGPCTRVRRQAMPFKCMQLTDFILKFPHSARQKYVRKAWEKADINTKWAATRWAKKIDARERKAKMTDFDRFKVMKAKKMRNRIIK	Ribosomal_protein_L14|PF01929.15	BAB27053.1	200.7	28
TRINITY_DN12394_c0_g1_i1	type:internal	465	GGTGCATTCAGAGATGAAAACAACATCATTCATGTGAAAACGCGAATCACTGAGTGCATAGATGCACCTAACTTTCTTTTGCCAATCTTACTGCCATACAATTGTATATTTACACAAAGACTTGTAGAGAATTTTCATTTAAAGAATCATCATGCAGGGACGCAGTTACTTTTAAGCATAATACATGAGAAATATTGGATAATAAGTGGTAGAAGAACTGTTCGAAAGATATGGAATGCCTGTGTTAAATGTCGAAGATTTAAAAGTAAATCTCCAATGTCTGATCCTGTTTCTCTACCATCTGATAGAGTAAAAGATGCCGCAGTGTTTGAAGTGGTAGGTGTAGATTTGGCTGGTCCCCTGTACGTCAAACAGGGTGATAAGGTTTGGATTGTCCTC…	GAFRDENNIIHVKTRITECIDAPNFLLPILLPYNCIFTQRLVENFHLKNHHAGTQLLLSIIHEKYWIISGRRTVRKIWNACVKCRRFKSKSPMSDPVSLPSDRVKDAAVFEVVGVDLAGPLYVKQGDKVWIVLYTCAIYRALHLELTSSLSTDAF	PMP-22/EMP/MP20/Claudin_family|PF00822.18;Protein_of_unknown_function_(DUF1560)|PF07597.9;His(2)-Cys(2)_zinc_finger|PF09337.8	XP_001898926.1	91.7	121
TRINITY_DN12395_c0_g1_i1	type:internal	357	AACAATGTTGGCAAAGGGCAAGTGGTCGCATACAAGAAATGGTACACAAGCTACGGCATGCAAAATCCGAGTAAAATTTATAGCAATAAGAAGCACTGGAAAAACAACTTGGCTCGTCTTGTATACGGATGGGTTGTAGAAATGTCCGAATGCAGCGCCCCGTGTGGAGGAGGCATTAAAAACATTAGTGTAGTGTGTCAAACAGGAAATACGGTGGTTGATGATGGGTTTTGCGCTACCCTCAATAAACCAGGAGAAACGGGAATATGGCCATGCAACACTCAACCATGTTCCGGAAAGTGGCAAGAAGGATCATGGGAACCGTGTTCAGTCAGCTGTGGTCAAGGATTTCAGAGC	NNVGKGQVVAYKKWYTSYGMQNPSKIYSNKKHWKNNLARLVYGWVVEMSECSAPCGGGIKNISVVCQTGNTVVDDGFCATLNKPGETGIWPCNTQPCSGKWQEGSWEPCSVSCGQGFQS	Thrombospondin_type_1_domain|PF00090.17	NP_084243.3	69.3	80
TRINITY_DN12399_c0_g1_i1	type:internal	303	TGCTCTTCCGATCTAAAATCCCAAAGTAAAGAGCGAAATATGAGGTCTGTAAATGACGTACAAAATTTAGAAATTGCTGATGAACACAAGATTTTTTTTGAAGTTATTGAATATGAATTGAGAAATGATGAAGAGTGCACTCCAAGGAAGGTTACTGAATGTAATAATGATGACAAATGGAGTTTTTTTGTTGAAACCTGTGACAACATTACTTTTACTCTTCTCTTTGAGAAAAATAAAGAGACTATTGGTTCTAAATTATTAGCTGCTTCACCTGTTTTTGAAAATATGTTGAATAGCCCC	CSSDLKSQSKERNMRSVNDVQNLEIADEHKIFFEVIEYELRNDEECTPRKVTECNNDDKWSFFVETCDNITFTLLFEKNKETIGSKLLAASPVFENMLNSP	Major_surface_antigen_from_hepadnavirus|PF00695.17	NA	NA	44
TRINITY_DN12401_c0_g1_i1	type:internal	360	CCGATCTTCAAACGCTCACAAAGTAATTTTAACGAATCTCTGATGAAATTTCAAGATCAACTGTGTAATAATATAATGGCTGTGAACATGAACGTTATGAATGAAAACGAAGACTGCAATATTCATCTATCATCTATGATACATAACTATGATTCGTTTATGGCAAGTTCTCAAAAATTCTCCGAACTTAAATACATCGTGGATGATCTCGAAAAAATCAAAAATGACTTTCGTGAAACTCTATTAAATGCACTACAAGAAGAACAAAACAAAATACACGAGCATCAGTCTGAATTGGAAAATGTTGGATCTTTTGGTGTCTGCAGCTTCGATTCCCTTCAACCACTTTTAAACAAATGC	PIFKRSQSNFNESLMKFQDQLCNNIMAVNMNVMNENEDCNIHLSSMIHNYDSFMASSQKFSELKYIVDDLEKIKNDFRETLLNALQEEQNKIHEHQSELENVGSFGVCSFDSLQPLLNKC	Baculovirus_polyhedron_envelope_protein,_PEP,_C_terminus|PF04513.10;CD34/Podocalyxin_family|PF06365.10;MHC_class_I-like_protein_M157|PF11624.6;PHAT|PF09246.8;Uncharacterized_conserved_protein|PF10241.7;Replication_protein_C_C-terminal_region|PF11800.6	NA	NA	112
TRINITY_DN12403_c0_g2_i1	type:internal	327	ATCCAACGTCGGAAGAGGATTGATGTGTCAAATGATGATAATTCTGTTACAGTTGTTAGTTATAACTATGCATATCCTTATGGTGGTCGTGGTGTTTGCGGCTCAGTTTTGTTAAGCTCACAGAATACAGAAGCACCAATTATTGGTATTCATATTGCTGGTTTGGCAGCTGGCGGAGAGGGGTACTCCGAAGCTATTGTATATGAGTCATTCCAACATTTGTTGAAGGGCTCTATATCGGTAGTAAGTAATAGTGCTTATCCCGTTTTAGTTGAAGAACCTCCCATTATGAATTTGCCAGGTAATGTGGAAATAGTTGGTGTTATC	IQRRKRIDVSNDDNSVTVVSYNYAYPYGGRGVCGSVLLSSQNTEAPIIGIHIAGLAAGGEGYSEAIVYESFQHLLKGSISVVSNSAYPVLVEEPPIMNLPGNVEIVGVI	3C_cysteine_protease_(picornain_3C)|PF00548.18;Tungro_spherical_virus-type_peptidase|PF12381.6	AAP49283.1	54.7	124
TRINITY_DN12424_c0_g1_i1	type:internal	345	GATATGGATCTTAAAGCACAAAAGGCACAGAGACGAGTACTTAGGACTGCATTTACCTTAAGTGCAAATAAGATAGAAAGTGAGCTAAAGAATGATGTAGTAGATTTACAGAAGATTTCGTTGCTACAAATGCAATTGAAAGATAAATATTTGGGATTAGAAGCAGCCCAAGAAGCAGTATCTGGAACTTTGCTACAATTAGAAGATAATGGAGAAGAATTTGAGACTGATTTCACTGATGCGGGAAGCTACCATGAAAAATATTTAGAATATTACACTCACATCGATAAGAAGTTGGGAGAGACTGTTATTTCTGAAGTTCCAGACACACCAAGAAAGTTTAAG	DMDLKAQKAQRRVLRTAFTLSANKIESELKNDVVDLQKISLLQMQLKDKYLGLEAAQEAVSGTLLQLEDNGEEFETDFTDAGSYHEKYLEYYTHIDKKLGETVISEVPDTPRKFK	NA	NA	NA	24
TRINITY_DN12428_c0_g1_i1	type:5prime_partial	642	CCACCATCCACTTCATCGATATTATCGCCAACTTTTACCAGCACAATACCACTGTTCTCATCCGAAACTCAAGGGCATTCTTCCTTGTTTTATCCCAGTGTTCAGCCACAACCTTCTCAAGAGCTTGTCATGGACAGTAGTGAATCGGGCACGGCAGCTCTGGTGTCTTCCAGCGTTTTAAACAGGACTACACCATCATCTAGTTCCATTTTACCCTCTTACAGCTCTTCGAATTTTCCGACGTCTTCTGTCGGACCTACCATGCAAAGTCTTCAGATGCCTTGCTTGGAATTTTTTGGAACGTCGGATTCAGGTTTCACCCCAGGTCCTCTAACTATGGCTGCCAGTGTTTTATCTTCTTCATCTTCACCATCATCGACTGACATATCTTCATTTGGT…	PPSTSSILSPTFTSTIPLFSSETQGHSSLFYPSVQPQPSQELVMDSSESGTAALVSSSVLNRTTPSSSSILPSYSSSNFPTSSVGPTMQSLQMPCLEFFGTSDSGFTPGPLTMAASVLSSSSSPSSTDISSFGLEILDSELRTPPVTTAISSLSSPFSLSGTVPMHREPSYVPMMHDQVSSSTSTNIYDSCVPSTTTSSTSSSMVQSDVWRPY*	NA	NA	NA	112
TRINITY_DN1244_c0_g1_i1	type:5prime_partial	483	TTTACTAAAGAGGTAATGTACGTTACTGTTAAAGGAGAAGCAAAACTGTACGATGGCTGGCTGGCTGGAGTGTCTACTATTCATAGGACAGACGAATGCGAGTTGAGGACGAACAAGACCACAATCTCTGTAGCTGCACATCTGGGACTGAACAAGCTGAAATTAGCATACAAAGGCCATGCAAAATTCATGTCTTGGGGTCCTTCCTTGATTGTCGGAGGAAGTGTGAAGAAGGTTTCTTTCTACTTCAAAATAGAACAATCCAATCGCAAAGGAGCAAAACCGGACCTGAGAGAATTCGAAATCGACGAATTGTCCACCATTTGGATTGAAATGTCCGGTCTTGGACCATTAACTTGGCTCCTCAAGTGGCTACTAACAGGAATATCAAAGCTAGTG…	FTKEVMYVTVKGEAKLYDGWLAGVSTIHRTDECELRTNKTTISVAAHLGLNKLKLAYKGHAKFMSWGPSLIVGGSVKKVSFYFKIEQSNRKGAKPDLREFEIDELSTIWIEMSGLGPLTWLLKWLLTGISKLVEDFIVEKLTVNIRGYMESEFQKLSFPV*	Group_7_allergen|PF16984.3	NA	NA	156
TRINITY_DN12450_c0_g1_i1	type:internal	444	GAGAACAAGAAACAACACATTGTCAAGAAGAACTTCTTCCAATTACTTGAAAATGGATGCACCTTTTCTCGAATAAAACTAATTTATTCTTACAGTGGCGCAGAACCACCTCCACTGTTTTCATTGATGGGAGACATAATTATATCTGAAACACCGATAAAATCTGTAATTGAATTCGTCAGCATGAAAAATTCCGAACGAAGCGAATATCTTTCTTTGTTCGAATTATCGGATGACTTTGGCAACCTACTAAAAGTTCAGTCTTTCTCCGATGTTAATCTTCAGTGTGAGGACGAAATCGTTCCTGCCCACAAAAGCATTCTAACGGCAAGGTCACCTGTATTCGCAGCGATGTTCCAAAATAAACAAATGACAGAAGCTGTCGAGAATGAAGTAAAC…	ENKKQHIVKKNFFQLLENGCTFSRIKLIYSYSGAEPPPLFSLMGDIIISETPIKSVIEFVSMKNSERSEYLSLFELSDDFGNLLKVQSFSDVNLQCEDEIVPAHKSILTARSPVFAAMFQNKQMTEAVENEVNIVDTDISVLQIMLSY	BTB/POZ_domain|PF00651.29;Ndr_family|PF03096.12	ABG24573.1	60.8	224
TRINITY_DN12452_c0_g1_i1	type:5prime_partial	495	GTGTGCTCTTCCGATCTACCGAACCTACCCTCTGATTCTAGCAGGATGAAGATCAACAGGTCTAGTGTCTCTGTATGGTTCCTGTTGACTCTCCTACACACTTGCTGTGCTACGAAAGAAGATACTGAATACGATGAGGTTCCTACCCACCTCAACGTGCCGCGAACGTTCCGATTCTTCTCCAGAGGTCCAGATCCCGACAGCCCCAAGTATGAGGGGCGCAAGATCTCTCAACACGTGGATAATGTCTTCCAAGGAGGCACCATAGGGGTTGAAATGGACATGGACAAATATGTTGGTAAATGGAATAAATTGTGGAGGAAACTCAAGAAGTATATGCCAGAAGTTCGTCACTTCGATAAGAGGTCCGAGTTCCAACCTAACGATGAACCCTCACCT…	VCSSDLPNLPSDSSRMKINRSSVSVWFLLTLLHTCCATKEDTEYDEVPTHLNVPRTFRFFSRGPDPDSPKYEGRKISQHVDNVFQGGTIGVEMDMDKYVGKWNKLWRKLKKYMPEVRHFDKRSEFQPNDEPSPEFEEAEDLVGRGFINPRVKPPARFEDREREW*	NA	NA	NA	806
TRINITY_DN12460_c0_g1_i1	type:internal	660	ATTAAAATTGTGAAAAGAACTGTATGGATACTTCAAGTAACAGGTATCCTTCAAATATTGGAGGAAATGTCACTTCTTACCGTTGATAAAAGCGTGCAAGCAGACATACCATCAAACAAAAGTGGGCAAAACACTTCTTTTAAGCAAATGAAAATCGACAAATTTCATTCCTCACCTACTCAAAAAAATCCAATATGCAATCTACAGTTATCATTTTCTCCCGTCAAATTGAATGGTAAATACGAACAAACAAGTTTTCTGAACGAATCATCTGACTTGTCAGAGGAACGAAACTCTCCCGCTGTTTTAAAATTAGAAGCGGAATTCACAAATACTACGGCATGTCGACCATCATCGTGTAATAACAGCCCTGTATGTGATATAAACGTATCCCTTTCT…	IKIVKRTVWILQVTGILQILEEMSLLTVDKSVQADIPSNKSGQNTSFKQMKIDKFHSSPTQKNPICNLQLSFSPVKLNGKYEQTSFLNESSDLSEERNSPAVLKLEAEFTNTTACRPSSCNNSPVCDINVSLSPSVKTKYTQVNTEECVSRDGNFLKKKWNEWKSKQSVIPNPHGKFTEILNCLKKANISRYIYNSKEILQRIKEPNSPETFGCCNILMS	NA	NA	NA	251
TRINITY_DN12477_c0_g1_i1	type:internal	648	ACAACTAAAGGTGGACGTCATGTGGACTATATTACAGATCAGTTGACATCTAAAATTGCAGAAGTAATTAAGAAAAAGAACAAAGGGGGTAAAGATGTGAAACCTTTTCAAATCAAAAGTCATCTGTGGGTATTTGTAAATTGCCTTATTGAAAATCCAACATTTGACTCTCAAACAAAAGAAAATATGACATTGCAAATAAAAAATTTTGGTTCTAAATGCCAACTAACTGAAAAATTTATCAACCAAGCAATGAAATGTGGAGTTGTAGAATCAATTATGTCCTGGATAAGATTCAAAGCCCAAACTGAATTGGAGAAAAAATGCAGTGGTAAAAAACATTCTAAACTTAAAGGTATTCCCAAATTAGAGGATGCCAATGATGCTGGTACTAAGAAC…	TTKGGRHVDYITDQLTSKIAEVIKKKNKGGKDVKPFQIKSHLWVFVNCLIENPTFDSQTKENMTLQIKNFGSKCQLTEKFINQAMKCGVVESIMSWIRFKAQTELEKKCSGKKHSKLKGIPKLEDANDAGTKNSIDCTLILTEGDSAKSLAVSGLGVVGRDKYGVFPLKGKMLNVREASHKQILENAEINNIIKIMGLQYKKKYESIDDLKTLRYG	Toprim_domain|PF01751.20;Xyloglucan_fucosyltransferase|PF03254.11;DNA_gyrase_B|PF00204.23	AAI21351.1	362.1	296
TRINITY_DN12485_c0_g2_i1	type:internal	684	AAAAGGGTAAAAATGGCTGCTAGAGAAAAAACTCGAGATGAATTGGACATGCAAACTTTACGGGAATTAGCTTCTTTACCTGCAAATAAATTCTGTTTTGACTGTGGTCAAAGAGGAACAACGTATGTTAATGTAACTATTGGTGCTTTTGTATGTTCTTCTTGTGGAGGCCTTCTACGGGGATTAAATCCACCTCACAGGGTTAAATCTCTTACTGTGTGTTCATTCACGGAATTGGAAATGGATCGTTTAAAAAGTAGGGGAAATGAGTACTGCACTCATATATGGTTGGGAAAATATGATCCTAAATCTTCTGAATATGATCTTTCAAGCCAAGAAAAAAGAAAAGAGTTTATGATTCTGAAGTATGAAGAAAAAAAATATTATGTTGATCCAAGA…	KRVKMAAREKTRDELDMQTLRELASLPANKFCFDCGQRGTTYVNVTIGAFVCSSCGGLLRGLNPPHRVKSLTVCSFTELEMDRLKSRGNEYCTHIWLGKYDPKSSEYDLSSQEKRKEFMILKYEEKKYYVDPREAIKKMKPRAPAVPTTTTNSVTRSYTVISNKQPSQVQKSGVISQTFSAGDISSNATVPDLFKDYENDPFKETKPAVASADGASFADFSSAFGNAG	Putative_GTPase_activating_protein_for_Arf|PF01412.16;Double_zinc_ribbon|PF12773.5;TFIIB_zinc-binding|PF08271.10;Transposase_zinc-ribbon_domain|PF12760.5	NP_001084973.1	148.3	507
TRINITY_DN12508_c0_g2_i1	type:internal	429	AATATGGTGGCTGATGATGAGTATACTGAAACTAAGTCTGATTCAGAAGAAGAGGAAGTTGAAAATATTCAGCCAGATTATCTGAAGTGGCAACAAGAAAAAAATAAAGCTGATTTACCTGATATTGATAATGAAAAAATTGAAATTTCAAAAAGTATTGGCTTAAAAGTAGACATTTTAGGAAAGGTTTCTGTTACTCGCTGCAACACTATTACTAGTACCAAGATCTCAATAAGTCCTATGCAACGTCGAGGCTCCTTTCTCAATTCAAGTATCGGTATGAATTCAAAGTTCATCAAAGAATTTAGTGATTCCCCCGGAGCAGTAACAAGGAAAAATTTTGTATTTTCTGCTCTTAAGCAAGATAACACAAAAGCTCTTCCTTCATCTCCTGTTATC…	NMVADDEYTETKSDSEEEEVENIQPDYLKWQQEKNKADLPDIDNEKIEISKSIGLKVDILGKVSVTRCNTITSTKISISPMQRRGSFLNSSIGMNSKFIKEFSDSPGAVTRKNFVFSALKQDNTKALPSSPVIEVKSTKPTDR	7_transmembrane_helices_usually_fused_to_an_inactive_transglutaminase|PF14402.4;Ferredoxin-dependent_bilin_reductase|PF05996.10;Parvovirus_non-structural_protein_1|PF12433.6	NA	NA	144
TRINITY_DN12515_c0_g1_i1	type:internal	567	TTAAATCAAAATAAAAATATAATTAAAGATATGACACAGAACAAAGATTCTTTATGTGACCAAATTCATGGCCTTGAAAAAAGAGAAAAACAACTTACAGATGAAAATGAAAGCCTCAAAAATGAAATAAAAGAACTAGTTTTGAAGGGCAAGGATTTAACTGTTCAGTTACAAACATTTTCTGATAATGATATTCATAAAAATCAAGAAATTCAGCAATTACAAGAACTTTTAAATGAAGTGCAATTGAATTTTCAAATAATTGAGAAAGAATTGACAGAATGTAAAAAGGAGTTAGTAGAGTGTAAAAATGAAGTTTTAAAACTAGACTCGGAAAAGAAAGAGCTTATGTCCGAAGTGTGCTTACTCACTAAAAATTCTGAAGAAATGAAAAATAAA…	LNQNKNIIKDMTQNKDSLCDQIHGLEKREKQLTDENESLKNEIKELVLKGKDLTVQLQTFSDNDIHKNQEIQQLQELLNEVQLNFQIIEKELTECKKELVECKNEVLKLDSEKKELMSEVCLLTKNSEEMKNKLSITENEVAILNNVLNESSKEFGFLKECLDEKLKVVEDLMKDYTSVDHCLISLEKQ	N-terminal_domain_of_unknown_function_(DUF4140)|PF13600.4;Coiled-coil_region_of_CCDC155_or_KASH|PF14662.4;Fez1|PF06818.13;Afadin-_and_alpha_-actinin-Binding|PF11559.6;Autophagy_protein_16_(ATG16)|PF08614.9;Reovirus_sigma_C_capsid_protein|PF04582.10;Modifier_of_rudimentary_(Mod(r))_protein|PF07200.11;IncA_protein|PF04156.12;Protein_of_unknown_function_(DUF745)|PF05335.11;STIM1_Orai1-activating_reg…	XP_001310118.1	53.9	150
TRINITY_DN12536_c0_g2_i1	type:internal	342	GTTTCTCAATTTTGTAGGTGGGAATATTCAACCGGATATAAGATGGATTCCATATATTATTATGTTCCTCTTATTACAATTTTCGGCTGTTTGATTTCCCAAGGAAACAGTATAAAATGCTACATTTGCAGTTTTTCACCATATGACAGAAATAACAGGACAGACAAATGTACAGAAGAAAACTTTCAACACGAAAAAGTATACAGTGGTGAAGGTAAATTAGGATGTGAATCAGTTGCTCAGTATGATGCAAATGATGAGATGGAGCAGTGGAAACGAAATTGTCTACAGGAAGGTCATAAACTTACCAATGACTGCCAAACCGAAAAGACTCCTGTTTTG	VSQFCRWEYSTGYKMDSIYYYVPLITIFGCLISQGNSIKCYICSFSPYDRNNRTDKCTEENFQHEKVYSGEGKLGCESVAQYDANDEMEQWKRNCLQEGHKLTNDCQTEKTPVL	NA	NA	NA	176
TRINITY_DN12540_c0_g1_i1	type:internal	375	GATGATAAAAAAAAAGTAAACATAGTAGGGACGTGGCATCCAAGAAATCATGATATGGCCATCTGCTCAAACTTCCGGGGTGACTGGGGTGAAGTATGCTTGTCTAAAGGTGAAACTCCAAAATTTTCGACCTTATCTTATGATCTGAACTCCAAAGGTTTTATTTTTTGTTTTTCCTTTTCCAAAAAGACAGCTCAAGGAATACAGAATTTGTTGATAATCTTTGATACTTACAAGCTTTCAGTGTGGAATGTTTGTGAAAAGAAATTGGAATTGCAGGTACCTATACTGACGGGTTTTATCTATGGACTCTCTTTTTCTTCTATTAACCCAAATTTATTGGCTATTGGTAATGGAGACGGAACGGTGAAAATT	DDKKKVNIVGTWHPRNHDMAICSNFRGDWGEVCLSKGETPKFSTLSYDLNSKGFIFCFSFSKKTAQGIQNLLIIFDTYKLSVWNVCEKKLELQVPILTGFIYGLSFSSINPNLLAIGNGDGTVKI	NA	NA	NA	88
TRINITY_DN12560_c0_g1_i1	type:internal	423	AGTCGGCTAAAACTTGTGTCAGTTTCTTACGATCTGCCGAATGAATTCTTGTCTCCTTATCCAAAAGCGATATTTTACTCGCATGAAAATAGAATAAAATTTATACTCGACGTCATGAAAGCTCTAAATAATTACAAATCTCTTACGAATAGCATTCATGAAAATTGCCAAACAGTATCTAAAGCATGGGTCAGATATCATCTTCCAAATTTTAACAAATCCGACACATCCACCGAAACAGCAGATATGCCAAAAGCGGACGATCTGAGGGATCCGAAGATAGTAGAAAAGTTTTTATCACAGATAAGACGTCTTTGTGATTCTGTTACAAAAGTATTAAAATTCAAAGCTCAACATAAGATTATGAACTCTTGCAAACAGAAAAACGAAGAAATTCAT…	SRLKLVSVSYDLPNEFLSPYPKAIFYSHENRIKFILDVMKALNNYKSLTNSIHENCQTVSKAWVRYHLPNFNKSDTSTETADMPKADDLRDPKIVEKFLSQIRRLCDSVTKVLKFKAQHKIMNSCKQKNEEIHRSSLKPRD	Alpha/beta_hydrolase|PF06259.10;Protein_of_unknown_function_(DUF3334)|PF11813.6;DNA_polymerase_III_beta_subunit,_N-terminal_domain|PF00712.17;PAZ_domain|PF12212.6;Protein_DA1|PF12315.6	NA	NA	161
TRINITY_DN12577_c0_g2_i1	type:internal	357	TACGAAAAAGAAAAGCAGCTAGATTTATTGACACCTTACCAGAAAATTGTGCATAAACTACAAACTGATGAAAAATGGCGTCAAGACATCATCCAGGGAAAAAGAATTGGACTTTATCGTTTAAAAGAGGAGCTAGGAACTGGCAACTTTTCGCAAGTCAAAGCGGCAACTCACGCTTTGACCAAAGAACGAGTAGCGGTGAAAATTCTTGATAAATCCAAACTAGACCACAAAACTCAGAAAATGCTAGCAAGAGAAATTCTTTCAATGGAATCTCTTCATCATCCACACATTATACGTATATATGAAGTCCTAGAAACTCTTTCTAGAATTTATCTTGTGATGGAATATGCAAAT	YEKEKQLDLLTPYQKIVHKLQTDEKWRQDIIQGKRIGLYRLKEELGTGNFSQVKAATHALTKERVAVKILDKSKLDHKTQKMLAREILSMESLHHPHIIRIYEVLETLSRIYLVMEYAN	Protein_tyrosine_kinase|PF07714.15;Protein_kinase_domain|PF00069.23;Domain_of_unknown_function_DUF87|PF01935.15	NP_001253575.1	149.4	164
TRINITY_DN12580_c0_g1_i1	type:internal	657	CCTCTCGTACTTCTAATGGCTAAATTTTCTCTCAAAGTGTTGGGGTCTGTTGTTGCCTTCTTTTGTTTCTGGGGTATATTTAAAGAACAACTTTTTACCTTACCTTATGTTCTAGTGATTATATCAGTTGGAGCTGCCCTTTTTACTGGCTTATCTGCTTGTGTGCCTGATGAAAATGAAGTGAGTTGTCCTAATGAGCTTATGCAAAAAGTTGTTGCTGAAATACATTATATTCCGGATAATTTTAAAACTATGGCTCATACTACTAAAGTTAGAAATGAATTTAGTCATCTTTTTCCTTACACAATTGTTATTCTCTTGGAGGAATTACTCAGCCCCTTAGTAACACCTTATATCTTAATTTGCCGTCTACGTCCTCAAGCTTTAGAAATAGTAGAT…	PLVLLMAKFSLKVLGSVVAFFCFWGIFKEQLFTLPYVLVIISVGAALFTGLSACVPDENEVSCPNELMQKVVAEIHYIPDNFKTMAHTTKVRNEFSHLFPYTIVILLEELLSPLVTPYILICRLRPQALEIVDFLRNFTVHVDGVGDVCSFALMDVSKHGNPQWLGQGLSKADQVQQAEDGKTELSALHFALMNPYWEPPAATSAFIQNFREQVTIAKD	Autophagy_protein_Apg9|PF04109.14	BAF82444.1	217.6	204
TRINITY_DN12591_c0_g1_i1	type:3prime_partial	1176	ATGTGCGAAAGTGTGAAAACTAATGAAATGTTTATAATTCGTGCATTAGAAAAAATTCTTAATGATCGTGAAATTAAAAAATCGCACCATAGTGAATTACGTAAAGCTTGTGAAATCGCCTTAGCTGAAATAAAGAATGAGACAAAAGAAAGTCAAGAAGAAAAGACGTCATCCTGCTTGCCATTGCCAAAATCTAAAGCAGGAAATTTGGAAGCTGAAAAATATTTTCTTCCATTCGAACTAGCTACTAAGTCAAAATCTCCAAGAATTGTTATTACTGCAATTGACTGCATACAAAAATTAATTGCATATGGTCACCTAACTGGAAGTATAAATGACCCAGTAAATCCTTCTAAGTTCCTGATTGATAGAATTGTTGAAGCTATTTGCAGCTGTTTT…	MCESVKTNEMFIIRALEKILNDREIKKSHHSELRKACEIALAEIKNETKESQEEKTSSCLPLPKSKAGNLEAEKYFLPFELATKSKSPRIVITAIDCIQKLIAYGHLTGSINDPVNPSKFLIDRIVEAICSCFHGPNTDDGVELQIIKALLTVVTSQACEVHEGSVLLAVRTCYNIYLASRNLINQTTARATLTQMLNVIFARMEAVADANYPPKSSEEIEEQVKLEAASVLEEIVERVSSKEENQESINNAVPDQSSSDNPAPNVIYRLPSQESLETDDAQNSEQPQPNFSHILQKDAFLVFRSLCKLSMKPLPEGQPDPKSHELRSKILSLQLLLSILQNAGPVFRSSEMFINAIKQYLCVALSKNGVSSIPEVFELSLAIFLALLENFK	Guanine_nucleotide_exchange_factor_in_Golgi_transport_N-terminal|PF12783.5;Glycosyl_hydrolases_family_17|PF00332.16;Dimerisation_and_cyclophilin-binding_domain_of_Mon2|PF16213.3	XP_319652.3	191.4	580
TRINITY_DN12598_c0_g1_i1	type:internal	429	GCAGCTGCTATTCCTGCTGAAAAATCGAAAGTCAATTTCGAACTTGTTCAAAAATCTCTCTGTTCCGCTAAGAAAGTCATTAAAAATGTAGAAAAGCAAAGCGAAGACTCTTCGTGCCAAAAGTTTCCATCAAATCTGACAGCAAAAGCGAAGTCGTCAGTTTCAGATCTTGCATCCGATTCTACGACTACCCTTATAAACGAACTCAAAGTCAGCGTAAGATTACCGCAAGATAAAAATGTCGCGGCCGATTCAAAAGACGATTTTAAAAATAAAAGCTCTCATTTGCAAGAGCAATCAAGTAAAGAAAGAAGACATGAGCATTCAAATTTATCTTTATCTCAAAGCCGTTCTCTCAATAATGTGAGTACTGCATTAAGAAATTTGAAACGTAATATT…	AAAIPAEKSKVNFELVQKSLCSAKKVIKNVEKQSEDSSCQKFPSNLTAKAKSSVSDLASDSTTTLINELKVSVRLPQDKNVAADSKDDFKNKSSHLQEQSSKERRHEHSNLSLSQSRSLNNVSTALRNLKRNIEDVISIFNSL	Transmembrane_protein_247|PF15444.4;Flagellar_P-ring_protein|PF02119.14;Exocrine_gland-secreting_peptide|PF16590.3;Protein_of_unknown_function_(DUF1359)|PF07097.9;Protein_of_unknown_function_(DUF3130|PF11328.6	NA	NA	112
TRINITY_DN12615_c0_g1_i1	type:internal	429	GATGTCACAAAAATGGAAGGAATACTGAACAACTTGATGGTACAGTACTTGGCAGTTATTCAGCAATTAGGATTCTTGATGAATTGTACTCCAGATTCCTTTAAAGGACATTATGGTGAAATCCCATGTATTTACAAGGATAAAAAATTACTATGTAGTTTAAACAAAAATAATCCAATTTGGAATGAAATTTCCAAAAGCATCACTGCTTGTACAACAGATCTTGAGAAGGGTTTTGATGTAATATATCAGTCTGTATCAAACACTATGATCTTTACAACTTGGGAAAAATTTTCGGAAATTGTGAAAGTTTTCAAAGTTATGCTGAAATCTCTTAGTGTTTTTTTGAACTCTTTAAAGGGATTCAATGTCGATCAAAATCAACAATTAACTAGAAAT…	DVTKMEGILNNLMVQYLAVIQQLGFLMNCTPDSFKGHYGEIPCIYKDKKLLCSLNKNNPIWNEISKSITACTTDLEKGFDVIYQSVSNTMIFTTWEKFSEIVKVFKVMLKSLSVFLNSLKGFNVDQNQQLTRNLTRLTCKIQD	NA	NA	NA	114
TRINITY_DN12627_c0_g1_i1	type:internal	477	CTAAAATTAAAATTTGCCAAGTTTGGGTACATTGAACATGTCAAAATTCGGCAAGGGGAAAGGTTATCGGGTAAAGAGTTTTTTAGGTATGGATTTGTTACATTCAGGACAGAAGACGATGCTTTGAAGGCTGTAGAAGCGAGTAAAACTGAACCAATTACTTTGAAAGGTCGAAATATCGATGTTGCTCCAGCCTTCAGCAAAAAAGCAGCAGTCAAAATTAGTTCTGTTCCTGTGGATAGCATTGGACAAACTGTTTACAAAGAGCATAAAATCTTTGTAGGAGGCCTTCCATCAAGAACTGAGTGCATAGATCTTCAAAAATTATTTCAGAAATATGGTGTTGTTAGATATACAACTGTTCTTAAAGGAAAGGGAGTAAATCGTCCATCCTATGGA…	LKLKFAKFGYIEHVKIRQGERLSGKEFFRYGFVTFRTEDDALKAVEASKTEPITLKGRNIDVAPAFSKKAAVKISSVPVDSIGQTVYKEHKIFVGGLPSRTECIDLQKLFQKYGVVRYTTVLKGKGVNRPSYGFVAFLTKESAKEAVKASNTKGIFMNN	RNA_recognition_motif|PF16367.3;Cytosolic_domain_of_10TM_putative_phosphate_transporter|PF14703.4;RNA_recognition_motif._(a.k.a._RRM,_RBD,_or_RNP_domain)|PF00076.20;RNA_binding_motif|PF08777.9;Nup53/35/40-type_RNA_recognition_motif|PF14605.4	NA	NA	346
TRINITY_DN12636_c0_g1_i1	type:complete	486	ATGTTTCGACATTTGGGAAAATGTGTAGTTCAGAGTGTACGTTCTAATTTAATGCCTCATACTAAAACTTATAATCCAATTGCAGTTTCGGCTCTTAGGTATTCCTCAAAGAAACAAGAATCGGATGAAGAATTTGATGCTCGTTATGAAGCATATTTTAATCGACCTGACATTGATGAATGGGAGATTCGCAAGGCTACGAATGATTTACAAGGAATGGATTTAGTTCCAGAACCCAAAATTATTATAGCTGCCCTTAAAGCATGTAGAAGGTTAAACGACTATGCCCTTGCTGTCAGGTTTTTAGAAGGTGTTAAGGATAAATGTGGCATTCGCGTCAAGGAGATTTATCCCTATATCATTCAAGAAATTCGACCCACTTTGGATGAATTGGGTGTC…	MFRHLGKCVVQSVRSNLMPHTKTYNPIAVSALRYSSKKQESDEEFDARYEAYFNRPDIDEWEIRKATNDLQGMDLVPEPKIIIAALKACRRLNDYALAVRFLEGVKDKCGIRVKEIYPYIIQEIRPTLDELGVLTPEEMGYDKPELCMPDVWEKPMFRKSS*	Cytochrome_c_oxidase_subunit_Va|PF02284.14	ABI52811.1	207.2	45314
TRINITY_DN12655_c0_g1_i1	type:internal	558	GGATTTGTGAAACAAAATGTATACAATTCTAAAACTGGTATGGACTCCTTGGTTGTTACACCTATCTCACAAGCCCAAGCTAAGCAAAGAGCAGGTCGAGCAGGAAGGACAGGACCTGGAAAGTGTTATCGTCTCTATACTGAGAGGTCGTACCGGGATGAGATGTTGACCACTCCAGTGCCTGAAATACAAAGGACTAATCTCGCTCACACAGTTTTACAATTAAAGGCTATGGGTATCAATGATTTGCTGTCCTTTGATTTCATGGATGCCCCACCTCCTGAATCTCTAATAATGGCTTTAGAACAATTGCATTCCTTAAGTGCCTTGGATGATGAAGGACTACTGACTCGATTAGGCAGAAGGATGGCGGAATTCCCTATGGAACCTAATCTGTCC…	GFVKQNVYNSKTGMDSLVVTPISQAQAKQRAGRAGRTGPGKCYRLYTERSYRDEMLTTPVPEIQRTNLAHTVLQLKAMGINDLLSFDFMDAPPPESLIMALEQLHSLSALDDEGLLTRLGRRMAEFPMEPNLSKMLIMSVHLACSEEILTIVSMLSVQNVFYRPKDKQALADQKKAKFNQPEGDHL	Helicase_associated_domain_(HA2)|PF04408.21	AAM50025.1	335.5	1067
TRINITY_DN12665_c0_g1_i1	type:internal	315	AGAGATAGTGGTGTGGGTGCTGGAATTGACTCCTATTATGAATATTGTTTGAAGGCTTATATTCTGTTAGGTGATGATGTTTATTTAGAACGTTTTAATAAGCATTATTCAGCTGTCATGAAATACATCAGTCAAGGACCTTTACTAGTTGATGTTCATATGCATCGACCTCACACAAACTCAAGGAATTTTATGGATGCTTTACTTGCATTTTGGCCTGGTCTGCAAGTTTTAAAAGGAGATATTAAACCAGCTATAGAAACTCATGAAATGCTTTATCAAGTTATGCAGAGGCATAATTTTCTACCAGAGGCC	RDSGVGAGIDSYYEYCLKAYILLGDDVYLERFNKHYSAVMKYISQGPLLVDVHMHRPHTNSRNFMDALLAFWPGLQVLKGDIKPAIETHEMLYQVMQRHNFLPEA	Glycosyl_hydrolase_family_47|PF01532.18	XP_971536.1	206.5	122
TRINITY_DN12673_c0_g1_i1	type:internal	300	TCGTCGCCAGGAAGACCTTCCTACAAAACTGAAGACTCATCAGAAGAAGGCTACGATGAATATCCAGAGTATTATTACGATGAGGATGATTACGAAGATGAGGACGATGTGCAAAACATAAGCCCTGTTCCTAAGGTCGTAATAAGACTTCAGAAACCTCCTTCAACAACTCGTAGAACAACTACTACGACTACGACTACCACTACAACCACAACGACCAGGAGGCCGACACCGCCAACAACCAGACGAGCCCCTACCACAAGACCTCCTAAAAGAGGTTTACCTTTTGGTATCAGTCGA	SSPGRPSYKTEDSSEEGYDEYPEYYYDEDDYEDEDDVQNISPVPKVVIRLQKPPSTTRRTTTTTTTTTTTTTTRRPTPPTTRRAPTTRPPKRGLPFGISR	Mucin-like_glycoprotein|PF01456.15;Transmembrane_domain_of_transglycosylase_PBP1_at_N-terminal|PF14812.4;AJAP1/PANP_C-terminus|PF15298.4;Special_lobe-specific_silk_protein_SSP160|PF06933.9;Sporozoite_P67_surface_antigen|PF05642.9;SWIRM-associated_domain_at_the_N-terminal|PF16496.3;Lysosome-associated_membrane_glycoprotein_(Lamp)|PF01299.15;Multi-glycosylated_core_protein_24_(MGC-24),_sialomucin|P…	WP_011727124.1	55.8	24
TRINITY_DN12676_c0_g1_i1	type:3prime_partial	441	ATGCCTACACCTAAAGAGCTCACCCGTTCCCGGGAAGGCATGGGCTCTGCTCAGGCGTCAACAGCCTCTCAAGATTGGGCTCCTCATGCTCGAGCCTCCCTTGCCGATAACAACTCATCCCTGGAACCTCACCCTACTTCTTCCGTCTACAGAATAGGCATCTATGGATGGAGAAAACGATGCTTGTACTTCCTAGTGATCATTCTTTTTTCTATGGTGATCATCAACTTAGCTTTAACCATTTGGATCATTAGAGTAATGGATTTCTCTATCAATGGCATGGGTCGATTGCGTATATTGAAAGATGGGCTACGTTTGGAAGGTCGATCTCATTTTCTACATACGATATATGCTGCTAAGATTCAATCCAGAAGGGATCAAGATCTGAAATTAGAATCA…	MPTPKELTRSREGMGSAQASTASQDWAPHARASLADNNSSLEPHPTSSVYRIGIYGWRKRCLYFLVIILFSMVIINLALTIWIIRVMDFSINGMGRLRILKDGLRLEGRSHFLHTIYAAKIQSRRDQDLKLESSRNITINARNKEGK	Putative_stage_IV_sporulation_protein_YqfD|PF06898.9;Sarcoglycan_complex_subunit_protein|PF04790.11	XP_001375604.1	135.6	146
TRINITY_DN12692_c0_g1_i1	type:internal	366	TTACATAACCTTAAATCTGTAAAACCAGGAACATATGTTGAAGTAAAAGGAGATGTGCCTCCTGGTTATGCAGCTGCTGTGATATCATTGATGCAGATGGGGCAGTTATCTCTTCATACTCAAATACCATCACAAATTATTCTATTTGATTCTTCTTTAAGCCAAGAAGCCAGGACTAACATTGTGGAACGAATGATCAATACTTTGAGTGATAAAGAGTCAATTGAACTGTCTAGATTGTTGAATGGTGGGAACACCTTATCTAAATCATCTAACAAAGAAAATGTTACCAATGACAAATCAAGTGCAGTTGAAGATGTTGAAATGCTTGACAGTGAAGGAATGCCAAGCATAATGAATAGTTCA	LHNLKSVKPGTYVEVKGDVPPGYAAAVISLMQMGQLSLHTQIPSQIILFDSSLSQEARTNIVERMINTLSDKESIELSRLLNGGNTLSKSSNKENVTNDKSSAVEDVEMLDSEGMPSIMNSS	NA	NA	NA	142
TRINITY_DN12695_c0_g1_i1	type:complete	1317	ATGCGGCAGCGTTGCCGCTTAATATGCAGTCGATCGTCACTCTATGTATACGTTACAGCTATCGCTCTCTTCACTCTCTGCAACATCTTGGCCATAATCTTGATATCTCGTAGCTCGAAACAGAATGACCATCCGATTGCAAAAATAAATGCGCAGGAACCTTTGTTTCCAATACAAGATGGAGGTCTTCTGATAGGCAACCTTCTATCAAGCTTCGTTTTTAACTTCAATCAATCGTCTTCCAGAACGGACAGCAAGCGCACGTACATCATCCATGACTCAGTCGTTGTTGGAAATGCATATGGAAGTTATGGAAAATCATACGTCACACTGGCCACACAATGTTCCGTCGACAAACTGCATATGCTATTCGAATTGGCAGATACTTGGAGGGCGCCA…	MRQRCRLICSRSSLYVYVTAIALFTLCNILAIILISRSSKQNDHPIAKINAQEPLFPIQDGGLLIGNLLSSFVFNFNQSSSRTDSKRTYIIHDSVVVGNAYGSYGKSYVTLATQCSVDKLHMLFELADTWRAPMSVAVFVPGVDFYIAKVYIAYLRLCSQVIRTNVTFHFLYHRDMAPLDSSSSEHAHDHQAVPSCARSSEALPLLLRYRTSSFRRWWQQALHPQNHLRNVARKGVKTPYHFLTDIDILPIAGLAHQLDVFLSTSSKGKSCSKCVFVVPTYEMPEQLPVPRSKDELLERIRRKQSRPFHAKVFIHNQFATNHSLWEKIPNSRQLEAAYKISNYEFFYEPFYVARANVPLYDERFIGYGFTRNTQVFEMHLAGFDFWVLNPAFAIHRGVQ…	Glycosyl-transferase_for_dystroglycan|PF13896.4	XP_001657920.1	75.5	723
TRINITY_DN12701_c0_g1_i1	type:3prime_partial	396	ATGTCGGATTCAGAGGATAAATCTCCCCATAGACGAAGTAAAATAACCGAAAAGCCATCGGAAGATTCAAGTAGCAAGCCACCATCTAATATACCGGAAGATTCTTCTGCAAAAACCGCAGAGGAAGATGCTTCAAAAGACAAACCTGTAGAGGGTCCTACTCCATGCAGTTACGGTGGCGCTAGGCCGAAAGTGTTTCTCGAAAAGAAGGAAAAGAAATCTCACCCCAAACGAAGCAAAACTGATAAGCCATCATGCAGTTACGCTGGAGCTAGGCCAAAAGTCTACTCTGAAAAGAAAGGCGAAACAAAGAAATCGTCCAATGTCGAGCGAGCCGTAGAAATGTTAGAGTCCACACTTAGGAAGCAGGAGAAATTAGTTCGTCGTCGAAGAGAG	MSDSEDKSPHRRSKITEKPSEDSSSKPPSNIPEDSSAKTAEEDASKDKPVEGPTPCSYGGARPKVFLEKKEKKSHPKRSKTDKPSCSYAGARPKVYSEKKGETKKSSNVERAVEMLESTLRKQEKLVRRRRE	NA	NA	NA	271
TRINITY_DN12729_c0_g2_i1	type:internal	297	TCCGATCTGGGAAATTATTCAACAAAAGTTTCCAGCATTGTAAAATGTCTCATAAAAATCAGGCAGAAAGACTGTTCAGAAAAATCTTTGGTTTTTTCAACTTGGGCTGATTTTTTGTGCCTTTTGGAACAGGCTTTGAATGAAAATGATATTCCTTTTGTTAATCTAACTAACAGAAAGCATTTTCAGAAAAATCTGGACCTTTTTAAACTGGACAAACTTGTAAATGTTCTTTTACTTCCATTAAATGTGGGAGCAAATGGATTGAACATTATTGAAGCTAGATCGGAAGAGCGT	SDLGNYSTKVSSIVKCLIKIRQKDCSEKSLVFSTWADFLCLLEQALNENDIPFVNLTNRKHFQKNLDLFKLDKLVNVLLLPLNVGANGLNIIEARSEER	Helicase_conserved_C-terminal_domain|PF00271.29	XP_001370692.1	93.6	105
TRINITY_DN12746_c0_g1_i1	type:internal	321	AAAAACAACTGTCAAAACATCGAGATCGTCCAAAGGAAAAAAAGCGGTGAAAAACCTCACAAGCATAAAGAGCACAATTCCTTCACAAAAAAACTCTCCTCTCTTTCATTTGTCAGTTCTAAAAAAGGAGATTCTTTTTATAAGTCCAAAAATAAATCATCTTTAAACAAAAGTGCCTCCATTAAAAATATTAATATCCCAATACAGCATCCAAATACTCCTAGTGAAAATATTGTTAATGAAAAGGAACTAAAAACTAGCAAATCGAGTAATGAAGTTCTTCAGCTCTCTAATCATGTTACTGAGCAAAGTAATCCTTTT	KNNCQNIEIVQRKKSGEKPHKHKEHNSFTKKLSSLSFVSSKKGDSFYKSKNKSSLNKSASIKNINIPIQHPNTPSENIVNEKELKTSKSSNEVLQLSNHVTEQSNPF	NA	NA	NA	114
TRINITY_DN12748_c0_g1_i1	type:internal	414	ACTTCAGCAAAACCGAACAATAAGCACAAAAAGGAAGATAACGATACAGCAAACACTTCTGGAGAAGGTACAGAGAGTTCAAAGAAAGTAGACAATAACACTGATAATAAACCTAATGAAGAAAATAATTGCGAATGTGAAGAAAAAGCAGGAGAAAAGAAAGACGAAAGTAAAAATCCTAAGAAACCTGTAAAAGAAGGAAATGATAAGCAGAATGGGGAAGATGGATCGGGTAAGAAGAGGAATGAAATGAAAGAAAATGAAAATCAAGGTTCATGTAAAAAACAAGAATCAATAAAAGATGCCAATGAAAAGGAGGGTGCTGCCGAAGGAGTTGGTGATAAAGCAGGGGGAACCATTGGGGAAAAGGATGGAACAGCCGGAGGTGCTGTACGTAAA…	TSAKPNNKHKKEDNDTANTSGEGTESSKKVDNNTDNKPNEENNCECEEKAGEKKDESKNPKKPVKEGNDKQNGEDGSGKKRNEMKENENQGSCKKQESIKDANEKEGAAEGVGDKAGGTIGEKDGTAGGAVRKAGRSE	NA	NA	NA	150
TRINITY_DN12758_c0_g1_i1	type:internal	630	AAAATAAAACAATCCAAAATTAATTGCGTTAAGTTTATTCTTGCATTATTTAACTGTTATCACAAAGTTTTATTAATTGTTATTCATGAAATACGAAATTTACTATTCCAGCCTCCTCCCAAAGATGGCTGGAATGGAGAACTGAAAGGTTACTTCGTCGGTTACAAGTCAAGGGATTCCAACCAACCCTACTCCTACAAAACTATGGAATATCTACCGGAAGTACAGCAGGAATTTTTCCTCACGAACTTATTGAAAGCATCAGATTACAGTATTGTGGTTAAGGCCTACAACTCAGCAGGAAGTGGACCACCCTCACACGAACTGTATGTCAGGACTCTGGATGGGGATCTGCCCCCAGCACCGTCTTTGTATGTGCTCGCCACATCACCCACATCC…	KIKQSKINCVKFILALFNCYHKVLLIVIHEIRNLLFQPPPKDGWNGELKGYFVGYKSRDSNQPYSYKTMEYLPEVQQEFFLTNLLKASDYSIVVKAYNSAGSGPPSHELYVRTLDGDLPPAPSLYVLATSPTSVSLRWNTRKIDNPLSGYTVHYREEQGQWQEVAVVAPEDNTYTLSNLQPQKLYQIYVTATNQYGKGDPSEIVAIKTDE	Fibronectin_type_III_domain|PF16893.3;Interferon-alpha/beta_receptor,_fibronectin_type_III|PF09294.8;Fibronectin_type_III_domain|PF00041.19;Fibronectin-III_type_domain|PF16794.3;Purple_acid_Phosphatase,_N-terminal_domain|PF16656.3	NP_001107841.1	75.5	417
TRINITY_DN12765_c0_g2_i1	type:internal	402	AAAAATCCTAAACAAAGTTATTCATCAGAAAGATTATCTCGTTATGAAGCAGAGCAAAAGCTAAAAGCTATTCAGATAAAGCAAGAACAGGTTCAGAAAAGAAGAATGGAAATTATTCATAAAAGGGATGAAGTGCTGAAGAGAAGTGCCGAGGAATTTAAAGAAAAGTTGAAACAAGTTAAAATGAATCAGCAAGAATTGGATAAAGCTATGGAATCCTGGCAACAACAAGTTGTTTGTTACCAAAAAGTTGCTAATCTGCGAGCTGCAGAAAAAGTTGCTGAGATTTTTGAACAAAGACGCTTCAAAGCTATGCAAGAACGCTTAGCTAAAGAAGAGGATCATAAGAAAAATATGCAAAAAATTGAAGCTGAAGATTATGCTAAATTGCAAGAAATG…	KNPKQSYSSERLSRYEAEQKLKAIQIKQEQVQKRRMEIIHKRDEVLKRSAEEFKEKLKQVKMNQQELDKAMESWQQQVVCYQKVANLRAAEKVAEIFEQRRFKAMQERLAKEEDHKKNMQKIEAEDYAKLQEMM	Domain_of_unknown_function_(DUF1815)|PF08844.8;Domain_of_unknown_function_(DUF4659)|PF15558.4;Phage_capsid_scaffolding_protein_(GPO)_serine_peptidase|PF05929.9	AAQ73469.1	60.5	162
TRINITY_DN12769_c0_g1_i1	type:internal	741	CATCGTGACTCCTGTGATACAGACCCAACATGGTCACAACTGGATATTTCACTTCCTGGATTGTGTGCTTTATTTTTCTCTAATTGGATTCTAGGGGTGCTCTTTGTTCTATTTAGCGTAAAAGGAACCATCTCTGATCCCCAGCCTCGTCGTCATGTAGTGACATTGGTGTATGTTAAACTCTTTGTCAGTCTACTGGATGTTGTATGGGCAATTCTCGGCACCGATATTCTCGTCCGTGACTGCTTTTGTGATATCTACGGCGTCATTCTTGTCATCAAAGTTTGTACGATATTCCAATGGGTGACGTTCCTGTTTCGTCTTGTGGCAATAATCGGTTTCTATGATTGGAAATTCTCGAAGAAAAACACCAAAGACGGCATTACGAAAGAATATTTC…	HRDSCDTDPTWSQLDISLPGLCALFFSNWILGVLFVLFSVKGTISDPQPRRHVVTLVYVKLFVSLLDVVWAILGTDILVRDCFCDIYGVILVIKVCTIFQWVTFLFRLVAIIGFYDWKFSKKNTKDGITKEYFTDPIRRGTFKKWHFRVQTLFLWCTTPTDARKEALKTLSELLALLSCDLDFVASDLVAGILLYRQKCHRDFRSEKIDLLRAPPIVSADGERLDVFPPPSFEPWMNLQLASRYFDL	NA	NA	NA	204
TRINITY_DN12775_c0_g1_i1	type:5prime_partial	678	TCTGAGATGATGCACTTATACTTGGAGAGAATGTTCCGGTCCTCACTGATAGCGGCTCGCTTGTGGAAGATAGAAATCGATGGCTTCAGTGGCAACAAGAAAACCCGGCCTGTCGGCGTGGACTTCTTCCTGTATCTTATAAAAACTGGAGAAAACATTGCAACAGACCATCTGGCAACGGTATTCCACGAGAAATTGTCGACCAACAATACTTTCGGCACTTTCAGAGTGGATCCCAGCAAGACAGCTTTTGAAATGATCCAAGAAGAACCTCTGAAGGCGCCTACCCCACCACCTGAGGAAGACAACGTAGAACCCCCGATCCCTCAGTGGGCTATCGCTGTCATCGTCATCGGAGCTGCATCTCTCATCTTCATCGTCCTCTTCGCGGCTGTCACG…	SEMMHLYLERMFRSSLIAARLWKIEIDGFSGNKKTRPVGVDFFLYLIKTGENIATDHLATVFHEKLSTNNTFGTFRVDPSKTAFEMIQEEPLKAPTPPPEEDNVEPPIPQWAIAVIVIGAASLIFIVLFAAVTIYGRHHMRRRYSSKLSEEDMERSSGEWESKMAAAYENMAADTIYDAEDLHGDSYKKNRIATFHGIPSTLKRCDSWSSNGWTTPPKRKRPHVH*	Domain_of_unknown_function_(DUF1744)|PF08490.10;Alphaherpesvirus_glycoprotein_E|PF02480.14;DIRP|PF06584.11	XP_001662933.1	55.8	298
TRINITY_DN12779_c0_g1_i1	type:3prime_partial	612	ATGTTCGAAATATCAAGTGTAAGCAGTAAAGATCAGTTTTTAGAACAGGCTAAAGCAGCTCGATTGGAGCGAGCATTAGAGCGGAAACGTGAACATGCAACATTAACTATTCAGGCATATGCTCGAGGTTACTTTGCTCGAAAAAAATTAAAACATGACATTAGAAAAGAGTTTGATGAAACTATCCTTGATTTTACAGAGTCAAACAAGCTTCCTTCAGCTGTTGATATGTATAAGATTATTAGAAGACTTATGTTTGTGATCAGTGAAGAAAATGAAGATAAAGAGAGATTTGAAAAAATATGTCGTTATATCATTGCTAGTGTTGACACTGATTCATTAAAAAAAAGTTATATTGCTGTGGCCTTCAACAAAGAACTTGCCGTTGCCTGGATACAC…	MFEISSVSSKDQFLEQAKAARLERALERKREHATLTIQAYARGYFARKKLKHDIRKEFDETILDFTESNKLPSAVDMYKIIRRLMFVISEENEDKERFEKICRYIIASVDTDSLKKSYIAVAFNKELAVAWIHHLKTLLWHCCTDLKTLKPEFPQDAKSMNLHLHMLVSFTSVGTWKVLHNKQGEALKPAMNQLCANIMGHLVT	NA	XP_970749.1	186.8	134
TRINITY_DN1279_c0_g1_i1	type:internal	312	AGGACAATTTGCTGTATTCCTAATTTCATCATAGCAATTATTTTAATCATCTCATTTGGAGGTATTTTAACTTTATTGTTAGAAACTGATGCTGCCAACTTCTACTCTGAACCAAATGAATATACAACCATTTTCCGATCCATTTTTATTACTATGTTATGTATATCTGGTCTTGTAATTTCATTAAATTTATATACTGTTTTGCGTATCATAAAGACTTTGGTATCTTCACATCAAAGACGAATTGCTGGATCTTTTTTAAGAATAGCATCACCAAAAAATGAAAGTAACATCAGCCAGATCGGAAGAGCG	RTICCIPNFIIAIILIISFGGILTLLLETDAANFYSEPNEYTTIFRSIFITMLCISGLVISLNLYTVLRIIKTLVSSHQRRIAGSFLRIASPKNESNISQIGRA	NA	NA	NA	62
TRINITY_DN12816_c0_g1_i1	type:internal	357	GAAGAAGTACCAAGTACTGCAACTGTACCAAGCAATAATAATTCAAATATGCATGATGCTCTGCATTCTGTTCCCAACACTTCATCACCTGTTGCTAATTCAGCCTCATCTGCACCTCTTGCACAGTGCAAAAAAAATATTGCTCAGAATGACTGTACATTAAATTTAACTGAATGTCCACCCCATGCTGAGTCTGCACCTGTGTTTACAGATCAGACAAAAGCAGCAGTTTCTACTAATTCAGAACAGGCATTAGAATCAAAATCCAGTCCAAATTGGGCATTACAGATGCCATCTGATACCAATGAAACTGCAACAACAGAGGTACCATTTCCTAAAATAGCAGATCGGAAGAGC	EEVPSTATVPSNNNSNMHDALHSVPNTSSPVANSASSAPLAQCKKNIAQNDCTLNLTECPPHAESAPVFTDQTKAAVSTNSEQALESKSSPNWALQMPSDTNETATTEVPFPKIADRKS	NA	NA	NA	76
TRINITY_DN12818_c0_g1_i1	type:internal	441	AAGATATGTCAGCTGATAAAAAAAAATGCTTTGTTCCTAAAATTCCTCATGGTCAAATTGGACAACGCTTTTTTTTTACCATGGAGAAAGATGGACACGTGGAGAGAAGTACCTGTGGGTCAAATACTTGAAGGTGAGGTAGAACTGAATCTTCGATGTGATTATAAGTACAATCCCTTGGGGAAACCTACTATTGTAGAAACTGTAGCTTGTAAAGATGGTGAATGGTCTCCTATTCCGCAGTGCGAACCAGCTTTTAATAAAGAAAAAGATCAACTTGTTTCGAGTAGTACAAGTGTAACAACAGTACAGCAATCTGCTCTTAATACAAGTACCGGTAATTCTTGCACCTGTATGTATTTAAGTCACGATACAAATTTAGTGGCTTATGTAGGCTCA…	KICQLIKKNALFLKFLMVKLDNAFFLPWRKMDTWREVPVGQILEGEVELNLRCDYKYNPLGKPTIVETVACKDGEWSPIPQCEPAFNKEKDQLVSSSTSVTTVQQSALNTSTGNSCTCMYLSHDTNLVAYVGSKLLQSGSKVENNFK	Meiotically_up-regulated_gene_family|PF15474.4	NA	NA	62
TRINITY_DN12820_c0_g1_i1	type:3prime_partial	321	ATGTGCCATATCGATGACAGCGAGCTCATTGGTAACAGCTCCACCATGGAAATCATACAAACTTACCCATTTGTAAAATCATTTTTGGCTGGTTCAGTCAGTGGAACTTGTTCAACTCTTCTTTTTCAACCATTAGATTTGATCAAGACACGACTTCAGAATGCATCTAAGAATGGTGTTAAGGGAAGAGGAATGTATCCTCTAGTTGTTCAAGTTTTGAAAAATGAAAAAATGCTTGGATTATGGCGTGGTACATTGCCATCAGTCATGAGATGTGTTCCTGGTGTTGGAATGTATTTCAGCTCCTTGCATTGGTTACAA	MCHIDDSELIGNSSTMEIIQTYPFVKSFLAGSVSGTCSTLLFQPLDLIKTRLQNASKNGVKGRGMYPLVVQVLKNEKMLGLWRGTLPSVMRCVPGVGMYFSSLHWLQ	Mitochondrial_carrier_protein|PF00153.25	XP_001368896.1	111.7	209
TRINITY_DN12824_c0_g2_i1	type:internal	474	AAAGATTCAAAATTTAATGTGAAAAAGATGTTCGACACCTTTAAACATGATACAACTGAAAAAAAGGATGTACATGATTCTTCTCAAATTGAAGCAAAATCTAAAAAAAAAGTTATTTCTACACCTAATGAGCCTTCTAAAGAACCTGATGCTAAGATGAAAGATACATCTAAAGATTCCAAATTTAATATGAAAAAAATGTTTGATTCTTTTAAGCATGACACATCTGAAAAGAAGGATATTGTACCTGATTCATGTCAAATCGAAGAAAGATCTACAGGAAAAATTAGTCCTCCACCAAATGAGTTTCAAAAAGATGCAGAAATTTCACCGAAAGATACTTCCAAAGATTCTAAATTTAATATGAAGAAAATGTTTGATTCCTTTAAACATGATGCT…	KDSKFNVKKMFDTFKHDTTEKKDVHDSSQIEAKSKKKVISTPNEPSKEPDAKMKDTSKDSKFNMKKMFDSFKHDTSEKKDIVPDSCQIEERSTGKISPPPNEFQKDAEISPKDTSKDSKFNMKKMFDSFKHDATEKKDTVSDSSLTEKKSKEKVNLNA	Type-F_conjugative_transfer_system_protein_(TrbI_Ftype)|PF09677.8	NA	NA	151
TRINITY_DN1282_c0_g1_i1	type:internal	480	AAAGAGGCTAAAGAAGGAAAATTAAACCCCAAAATGTCAAAAGCTTTGAGCACTAGTGCAAAGCGGATTCAGAAAGAATTGGCTGAAATAACTCTTGATCCTCCTCCTAACTGCAGTGCTGGACCTAAAGGAGATAACTTGTATGAATGGGTGTCTACAATATTGGGACCACCTGGATCTGTTTATGAAGGAGGAGTATTTTTCCTTGATATACATTTTTCACCTGAGTACCCATTTAAACCTCCAAAAGTTACTTTTCGCACAAGAATTTATCATTGCAATATTAACAGCCAGGGTGTTATATGTTTAGATATTCTGAAAGATAATTGGAGTCCTGCTTTGACTATATCAAAAGTTCTTTTGTCGATATGTTCATTACTTACAGATTGCAACCCAGCG…	KEAKEGKLNPKMSKALSTSAKRIQKELAEITLDPPPNCSAGPKGDNLYEWVSTILGPPGSVYEGGVFFLDIHFSPEYPFKPPKVTFRTRIYHCNINSQGVICLDILKDNWSPALTISKVLLSICSLLTDCNPADPLVGSIATQYLQHREEHDRIARLWTK	Prokaryotic_E2_family_B|PF14461.4;UEV_domain|PF05743.11;Ubiquitin-conjugating_enzyme|PF00179.24;RWD_domain|PF05773.20	XP_001650207.1	320.9	436
TRINITY_DN12836_c0_g1_i1	type:internal	312	ACATTAAAAGGACCTTTGGAACTGAAGTTATATGCTGTGGAGGCTATAATAATGCGCAACTATATTTCCAAGATATTTCGTAGTTGCCAAGACAATCTTGATTTATTATCTCCAGGTCAAGGCCAGTCACTATTGTTGATGGCTGATTGGCTCTTCAAAGAATTCCATATGCCAGTAGAAAGCCTGTACTCTGCCCTTGGTTGTGAAACACCCTCTGATCCAGAATCTCTTCCAGCCAGGGAGACATGTGATATTTGTGAAACACCCTCTGATCCAGAATCTCTTCCAGCCAGGGAGACATGTGATATTTGT	TLKGPLELKLYAVEAIIMRNYISKIFRSCQDNLDLLSPGQGQSLLLMADWLFKEFHMPVESLYSALGCETPSDPESLPARETCDICETPSDPESLPARETCDIC	NA	NA	NA	115
TRINITY_DN12836_c0_g2_i1	type:5prime_partial	459	ACATTAAAAGGACCTTTGGAACTGAAGTTATATGCTGTGGAGGCTATAATAATGCGCAACTATATTTCCAAGATATTTCGTAGTTGCCAAGACAATCTTGATTTATTATCTCCAGGTCAAGGCCAGTCACTATTGTTGATGGCTGATTGGCTCTTCAAAGAATTCCATATGCCAGTAGAAAGCCTGTACTCTGCCCTTGGTTGTGAAACACCCTCTGATCCAGAATCTCTTCCAGCCAGGGAGACATGTGATATTTGTAAAACAGATGTCAAATTAGACAATATAAAAGTTGGTCAATGTTCAAAAAATCACCAGTTTGCAAGATGTTGTCAATCGTTACTGCTGTGTGATATTGTACCTTATAATCAATGTCCATCATGCAAGAGTGTTGCATTAAAA…	TLKGPLELKLYAVEAIIMRNYISKIFRSCQDNLDLLSPGQGQSLLLMADWLFKEFHMPVESLYSALGCETPSDPESLPARETCDICKTDVKLDNIKVGQCSKNHQFARCCQSLLLCDIVPYNQCPSCKSVALKNLWNFDSYCTYCGMMMLST*	zinc-ribbon_domain|PF13248.4;Protein_of_unknown_function_(DUF1272)|PF06906.9;Putative_zinc-finger_of_transcription_factor_IIIC_complex|PF12660.5	NA	NA	431
TRINITY_DN12837_c0_g2_i1	type:internal	495	GAATATCTAAGTATGATGGATCCTTTAGCAATTCATTTGGAACATATACAAGAATCATTAAGAATTTTAATTGGTATCTACAGGCTGAATTATTTACCACTCAGTGACACTTATTCTATTGTATTTCTTCGCCTTATAATCGGATGGTTAATAGATTTGTTAGATTATCCAAAGAAATATCATGTATTGCTACAACCCATGACAATTCAATATTCAGAGAAAAGTTCTGGTAAAGGCTTGGACACCTTGGCAATAATTGATAAACAACTTATTCATTCTTGCTGTCCATATTTAATAGAATTCAAAGTCCTTATTTTCAACTTTCTTAAAGACATGAAATATAAGCGAGAAGTGCGTAAAATCACTCCATTTTCAACAAAACAACCTGGAACATCATTG…	EYLSMMDPLAIHLEHIQESLRILIGIYRLNYLPLSDTYSIVFLRLIIGWLIDLLDYPKKYHVLLQPMTIQYSEKSSGKGLDTLAIIDKQLIHSCCPYLIEFKVLIFNFLKDMKYKREVRKITPFSTKQPGTSLSSKQQLESELEENFFFPPSSIFKENIRFHCRT	Codanin-1_C-terminus|PF15296.4	AAI17556.1	55.5	92
TRINITY_DN12848_c0_g2_i1	type:internal	558	CTTATAGCTCCTATTTCATCAAAAGGTGAAGGACATAGGAAAGTTTACGAAGCTGTTATTGAAGACAAGGGGAAAACGGTAATATACATCCGTTTATCAAAACAATGTTGTGAAGAGCTGAATTTAAAAGTAGATCAGGGATTTGTAGCTGAGGTGCAGTTTCAGTTAAATCGTCTACCTTTATGTGAAATGCACTTTGCGGTGGACAGACTACATCCACCTTCTTTGGTATTTCCAGATGTATCTGTTCGTCCTCAATTGTGGAATAACTTTTCCCTTTCTGACCTAAAATTAAATCCAAAACAAAAAGAAGCTGTTTTGGCCATTACAACTCCACTAACAACTCGTTTACCACCTGTTTTAATTATTGGTCCTTTTGGAACTGGCAAAACATACACA…	LIAPISSKGEGHRKVYEAVIEDKGKTVIYIRLSKQCCEELNLKVDQGFVAEVQFQLNRLPLCEMHFAVDRLHPPSLVFPDVSVRPQLWNNFSLSDLKLNPKQKEAVLAITTPLTTRLPPVLIIGPFGTGKTYTLAQAVKILLSQENTRILVCTHSNSAADIYIREYLHPCVAEGKYEATPLRIYYR	Magnesium_chelatase,_subunit_ChlI|PF01078.19;PIF1-like_helicase|PF05970.12;AAA_domain|PF13401.4;UvrD/REP_helicase_N-terminal_domain|PF00580.19;ATPase_family_associated_with_various_cellular_activities_(AAA)|PF00004.27;AAA_domain|PF13173.4;Type_III_restriction_enzyme,_res_subunit|PF04851.13;Bacterial_dnaA_protein|PF00308.16;SRP54-type_protein,_GTPase_domain|PF00448.20;AAA_domain_(dynein-related_su…	XP_004946278.1	226.9	376
TRINITY_DN12867_c0_g2_i1	type:internal	396	CTGATCGAGATTGGTGTTCCAGATAGTTTGGAGATAAGGAATGATAACTATGCAAATATCACGGACAGTATCTCAAATTTATCTTTATCTGAGGATTTGAAGAAGATTTTTCAGATGTGTCATACTTCTGATCAACTTTCTGCTCTTCAGAAGATATCTGAGGTGATTGCAAATACAAAGACAGCCTCTATTGTGTCCATAACTTCTGCAAGAGGGAGAGGAAAGTCAGCAGTGTTAGGCTTGGCTGTTGCCAGCACCTTAACTTCAAGATGCTTCAGAATATGTGTTACATCTCCCAATTTAGAGAACATTCAAACTCTGTTCAAGTTTCTTGTTGAAGGTTTAACTGTTTTGAATTTTGAAGAAGGTGTTGATTTTAATGTTCAGAAGAATAGC	LIEIGVPDSLEIRNDNYANITDSISNLSLSEDLKKIFQMCHTSDQLSALQKISEVIANTKTASIVSITSARGRGKSAVLGLAVASTLTSRCFRICVTSPNLENIQTLFKFLVEGLTVLNFEEGVDFNVQKNS	Protein_of_unknown_function_(DUF815)|PF05673.11;Virus_coat_protein_(TMV_like)|PF00721.19;Helicase|PF05127.12;Tim10/DDP_family_zinc_finger|PF02953.13;Protein_of_unknown_function_(DUF1128)|PF06569.9	XP_001901457.1	83.2	114
TRINITY_DN12879_c0_g1_i1	type:complete	462	ATGATGCCTACAGTAATAATAACTTTGCTGTTTGTAGTTCTTCAGTGCCAAATGGGTTTATCCCAGTTCAAATGTCCTAATAAATCTGGTTACTATCCTGATCCTGAACAATGTGACTTGTACTACGAATGCCGAAACAATGTTCCAAAAGAGAAACTTTGCAAAGATGGCCTGGTCTTCAATGATAATAATCCCTTATACGAAAGGTGCGATTTTCCGTTCGTGGTACACTGTGGTAAAAGAGAATATCTACAGGAACCTAAATCCAGTCCTAACTGTCCAAGAAAAAACGGCATGTTCGCTAGGTCTGATAGCTGCACCGTTTTCTGGCAATGTGTGGACGGAATAGCTTCTAAAATGTCGTGCCAAAATGGATTGGCTTTCAATCCCAAATCTGGA…	MMPTVIITLLFVVLQCQMGLSQFKCPNKSGYYPDPEQCDLYYECRNNVPKEKLCKDGLVFNDNNPLYERCDFPFVVHCGKREYLQEPKSSPNCPRKNGMFARSDSCTVFWQCVDGIASKMSCQNGLAFNPKSGTCQWKYLVPDCGKQPAESEE*	Chitin_binding_Peritrophin-A_domain|PF01607.22;Viral_family_110|PF01639.15	NP_001165849.1	138.7	562
TRINITY_DN12898_c0_g1_i1	type:3prime_partial	426	ATGAAGGAAGTAATTTGTGTACATTGTGGAGCTATTAATCATTCTCTGTATAAACAGTTCAGCAGTGATATAATAAAATTAACGACATGTGAAAAATGTGATAATTTGGTTGATGAATATGTGGAAACTGAGTATTCTATTATTGTCATAGACATGTTGTTATTGAGAAAAGAAGCTTTGAGGCATGTACTTTTCAACTCGAATTTAAAGGTAGCTTGGAAACTAATTGTTCTTTATATTCTGTGTGATGCTTATGAAAAAATGGCATCCCAAAAACATTTTAGGAACAAAACATTGAAATCTGATGTATTTATTAATGAATTAGAATTGAACTTCTATTTCATGTGCATAAAATCTTTTTTAGAATATTTCATTTTTGCTACTCTTGTTGTTGTTATT…	MKEVICVHCGAINHSLYKQFSSDIIKLTTCEKCDNLVDEYVETEYSIIVIDMLLLRKEALRHVLFNSNLKVAWKLIVLYILCDAYEKMASQKHFRNKTLKSDVFINELELNFYFMCIKSFLEYFIFATLVVVILYHSQVKSA	Transmembrane_protein_55A|PF09788.7;Arv1-like_family|PF04161.11	NP_001107083.1	79	104
TRINITY_DN1289_c0_g1_i1	type:5prime_partial	438	CAAGTATCTTCCAATACACCTCCTCCCCAACCACAAACGTTTTCTGTGGCATCCATCTCTGGGAGCAACACCTCTGATGAGGTTGGTCTTATGTCTAGTTCTGGAGGCCTTAACAATTCAAATCATTGGTTGCTCAACTCGCCAGATGTTCTAGCGCAAATAGCTTATCATAACGGTTTTCTTCTGGCATCACAGGGGAATAATACGTCTTATGCTAATTCATTTATTGGTAAATATCCTGGGCTGGATATGACTTCAGAGATGTCCTTGGGATCCTTCGATTCTCCTCTGATGCCTCCCATTAGTTGCAATGCTGAAAGTGTGATATGTGGGGCAAATGAGCAACCAATACACAATATAAGTATTTCCAATGGACCTGCATCATCTTTGCAGCAAACT…	QVSSNTPPPQPQTFSVASISGSNTSDEVGLMSSSGGLNNSNHWLLNSPDVLAQIAYHNGFLLASQGNNTSYANSFIGKYPGLDMTSEMSLGSFDSPLMPPISCNAESVICGANEQPIHNISISNGPASSLQQTSSVKVIVQEGAS*	NA	NA	NA	154
TRINITY_DN128_c0_g1_i1	type:internal	423	TTTAATGCAAGAAGGAAGTTAAAAGGTGCAATTTTAACTACCATGCTAGCGACGAGAAACTTTTCTAGTCGTAGCATGGTAAATAAGAAATCCGATGGTGGATCGCAAGTGAAGGAGTCAACTGATAGCAACGCAACTCTTGAGGAGGATGATATTAGAGTTAAGTCTCCGATCTCACCTCATCCCCCTGATAATAAATTCACATATAAAAGGCCCTCTGAAACAAGTTCAAGTATGTCTATGGCTTTAAAGAGCACTAATGGATTATTGGATCCTCGCAAACAAGAAGTTATAAAATTGACAGAGCAATTAGTAGAAGCAGTTAATAGTGGAGATTATGAATTTTATACAAAATTCTGTGATCCACACATGACTGCCTTTGAACCTGAAGCCTTAGGT…	FNARRKLKGAILTTMLATRNFSSRSMVNKKSDGGSQVKESTDSNATLEEDDIRVKSPISPHPPDNKFTYKRPSETSSSMSMALKSTNGLLDPRKQEVIKLTEQLVEAVNSGDYEFYTKFCDPHMTAFEPEALGNLVEGMDS	Calcium/calmodulin_dependent_protein_kinase_II_association_domain|PF08332.8;YppG-like_protein|PF14179.4	NP_001128422.1	79.7	89
TRINITY_DN12914_c0_g1_i1	type:5prime_partial	417	GAGAATTCTAAGTATCGTAAACGAATTATGCCTGTTCGAGAACTGAAGAAGAATAGTTCAGTTGCTTTGATAGCCAGTGATTTTAAAGAGCATCATGAGAGGTACCTAAAAAATGTTCCAAACTTCAAAATCGAAAAAATGCTTAGGTTGATTCAGAATGATATGAAAGGTTTGGAATTAGAAGAAAGCCTGCAAGAGATAAACAAAGAATTTTCTGTTGACCCAGAGGAGAATTTAAATGATGTGGATGACATAGAATTGAAACGAAAAAAAGAAATAATGAATTTGACTTTTGAAAAAAATCAAAAGAAACCCAGTGATCCAGATTTTAGGTATGATGTTGAAGTGGATTTCTCTCAAGTTGCTGGAATTGAATCTTCTATATGGGATTCTGAAAAA…	ENSKYRKRIMPVRELKKNSSVALIASDFKEHHERYLKNVPNFKIEKMLRLIQNDMKGLELEESLQEINKEFSVDPEENLNDVDDIELKRKKEIMNLTFEKNQKKPSDPDFRYDVEVDFSQVAGIESSIWDSEKDDDEF*	CEP19-like_protein|PF14933.4;Protein_of_unknown_function_(DUF740)|PF05340.10	NP_001107342.1	117.5	154
TRINITY_DN12924_c0_g1_i1	type:internal	318	CTCTTCCGATCTGGAAGACATCGAGCATCTTTTGACCAAGTTTCTGAATTTGACCGAAGAAGAATAATATCCTATAGTGATTGTGGATTATTCTTCAGAGAAATCAGTCAACATGTTGGACGAAACCAAGCAACTGGGTTATGGGTTTGTCATCGCTGGATGAAGGAGGAAACGACGGACCGACAGGGACGATCGCACTCACCTCGTTGCGCCACTGCCCGAAATGACAGGCGGATTGTGCGCATGGAAGTAATGGATCGCGCAGCCACATCACGAATCATAGCACAGCAGATTCAATCTGTTACGCATCATTTGGTG	LFRSGRHRASFDQVSEFDRRRIISYSDCGLFFREISQHVGRNQATGLWVCHRWMKEETTDRQGRSHSPRCATARNDRRIVRMEVMDRAATSRIIAQQIQSVTHHLV	NA	NA	NA	1664
TRINITY_DN12939_c0_g1_i1	type:internal	315	ATTGATGAGATTCAGGATGCAATTTGTGTGGGTCAGCAAAGAGACGGAGGGGATTGTAGGGCTGTGCTCTTCATCAAAATGAAGGATGGTTACTCCTTCACACCAGAATTCAGGGAAAAGGTTACAAAGAAGATAACAGGTGAGCTATGGTACGATTGTGTTCCACAGCTTATTCTGGAGACAAAAGGAATTCCGTACAACTTGAATAACAAGAAGATGGAAAGCATAGTTCGCAAAATTATTGCCACAAATCAAGTTCCTGAAGTGAATAATATCAAGAACCCTGAATGCCTCCAATATTACTGCAATATCCCA	IDEIQDAICVGQQRDGGDCRAVLFIKMKDGYSFTPEFREKVTKKITGELWYDCVPQLILETKGIPYNLNNKKMESIVRKIIATNQVPEVNNIKNPECLQYYCNIP	NA	NP_001006184.1	59.7	80
TRINITY_DN12945_c0_g1_i1	type:internal	543	ATAGACTCGCCATTGAGCGTGAAGGAAAAAGTAGCCTTCTGTTCACTTTGTCCAGCTAGGTTTTCAAACTCAAGCGATTACCAGATCCATTTTAAAGAAGTCCATGAAGCTGGAAACTATAGCGCGATGACGTCATTATGCGAATTGGTTGCCGAGAAACAACATCCACCAGGAAATAAACAGGTAGAAGGAACATTCAAAGACACAAATACTGTAACTGACGCGAAACAGAACCCGGCAACAAGTGAATGCTTTCTGAAAGGGAACCAGGTTCTTTCTGAACTTAATTCCAATACAGACAATTCCGAAAGTTCTAATGGTTTTAAAAAACCAACGAAAATTAATTTGGATAATACCACGAACAGGGCGGATGAAAATTTAACAGAACATCAGAGTTAT…	IDSPLSVKEKVAFCSLCPARFSNSSDYQIHFKEVHEAGNYSAMTSLCELVAEKQHPPGNKQVEGTFKDTNTVTDAKQNPATSECFLKGNQVLSELNSNTDNSESSNGFKKPTKINLDNTTNRADENLTEHQSYLKNKMSDLESESLNFISSTSSQNKDENFVPLSACDIYSNSDCSSESSD	Zinc_finger,_C2H2_type|PF00096.24;Zinc-finger_of_C2H2_type|PF12874.5;C2H2-type_zinc_finger|PF13894.4;Zinc-finger_double-stranded_RNA-binding|PF12171.6	NA	NA	208
TRINITY_DN12960_c0_g1_i1	type:internal	321	TTTTTCTGCTTGAATATTTATCCTGTGAGCCAAATATGTGGAGTCCGTGTAATTTTCGATGCTAAAAATTATTCATTTAAGCAAATGCGTCCTTTCGTTCCCAGATATCTTTCATTACTAGCTAAAGCTTTAAGGAACTCTTTACCCATTCGTTTTAAAGGCTTCCATATAGTCAACGAAGGAGTCCTCTTCCGTTACGCTTGGACACTTTTGAGGCTTCTTCTTTCGGATAAAATAAGAAATAGAGTTTATTTCCATGGAGATAAAAAAGAGGAAATAAAGAAATATATTCCCAAAGAGATTATACCACGCGAATATGGT	FFCLNIYPVSQICGVRVIFDAKNYSFKQMRPFVPRYLSLLAKALRNSLPIRFKGFHIVNEGVLFRYAWTLLRLLLSDKIRNRVYFHGDKKEEIKKYIPKEIIPREYG	Divergent_CRAL/TRIO_domain|PF13716.4;CRAL/TRIO_domain|PF00650.18	ABX75467.1	91.7	120
TRINITY_DN12969_c0_g1_i1	type:5prime_partial	618	ACGGCTGCACATTGTTTCAAAGGAAATCCCGTGGCTGAAAATTGGAGAATACATCTAGGAAAGCACCATAAGTACTTTAAGGATTCTCAAGAGCAAATACGATATGGCGTTAGACTTATAATATGGCCTGATCTAACTGGTGATAATATTCAAGGCTCACTGGATATGAGGCATGATATTGCTCTTATAAAACTCAATGCACCTGTTCAATTCAGCGATGTTGTAAGGCCTGCTTGTTTACCTTCATTGGGTTGGGATTTACGGGCTGGCTCGTTGTGCTATGTTACTGGTTGGGGAGAGACCAGAGGTACTGGATTTAACCACGCATTGAAACAAACAGATGTGTCGATAATGCCGAAGTCGAATTGTTCTTTTGAAGAACATTCTCAAATCTGCGTG…	TAAHCFKGNPVAENWRIHLGKHHKYFKDSQEQIRYGVRLIIWPDLTGDNIQGSLDMRHDIALIKLNAPVQFSDVVRPACLPSLGWDLRAGSLCYVTGWGETRGTGFNHALKQTDVSIMPKSNCSFEEHSQICVKNQKGFQSTCHGDSGGPLACKLGGRWYVMGATSYGTMGNFMHGLCAMPEQRTVFMKMSDKADWIQKMIDMYS*	S_locus-related_glycoprotein_1_binding_pollen_coat_protein_(SLR1-BP)|PF07333.10;Trypsin-like_peptidase_domain|PF13365.4;Trypsin|PF00089.24;Chymotrypsin_family_Peptidase-S1|PF03761.13	EAW60143.1	95.5	321
TRINITY_DN12977_c0_g1_i1	type:5prime_partial	639	CAAGATTGTGATTCAAAAAAAGATGAATCTCCTAATGAGATTGACATGAGATCATTTTTAATCAAAAATCTCCAACAAGAACCTCTTTTTACTGCAGAACAAGTGCTGGAAGAAATTGAAGAAATGATACAACAACAGCGATCACCATCATCATTAAATGCTTATGAAACTCCTGATAAATCTCCAGATGATTTGAAAAGTAAAGTTGCAGCTTATATTGGGATGTACAAGGATGAAGTTAAAAGATTAAATTTGGTTCAACTTCATGATCTGCTGACAGATATGGAAAATTTGATCCAAGATCATTCTGAAACACTAATTAATGAATTAGCCTTGCGTGATGAGTTGGACTATGAGAAAGAATTAAAAAACACCTTCATATCCTTGGTTTTAAGCATT…	QDCDSKKDESPNEIDMRSFLIKNLQQEPLFTAEQVLEEIEEMIQQQRSPSSLNAYETPDKSPDDLKSKVAAYIGMYKDEVKRLNLVQLHDLLTDMENLIQDHSETLINELALRDELDYEKELKNTFISLVLSIQNKRRQHNCIDQKKNARNGTINASEPKYLSTVIPYDPKQGSPSNPTLQILIKILRAINEDSPTVPTLLTDYILKVFCPT*	Mu-like_prophage_I_protein|PF10123.7;FEZ-like_protein|PF07763.11;Protein_CHLORORESPIRATORY_REDUCTION_7|PF12095.6;Poly(ADP-ribose)_polymerase,_regulatory_domain|PF02877.12	XP_001652666.1	38.5	486
TRINITY_DN12981_c0_g1_i1	type:internal	357	AAAAATACGCTTCCATATAAGAAAAGAATAGAGAACTGCACTTTAGAAGAAGCAGGATATTTGATAAATAATTTGGAAGATGTATTTTCAACTGCTCCTAAGGAATCTTCTAGGGGTCACATTATCTGCAATCTGAGCGAACTCATTGTGGCATTTGGATTGGTTCATGCAACTGCCTCTGAAGATCAAGATTATTCCAGTGAAGATTTTCCTGAAACGGCAAAAAATGCAGTGGAATGTTTTAAGTATTTGAAGATACTTCTGGAGAACTTAAATCCTCATGAACGTGCATACAAACGTTTCTTCCTTATTGATACAATATTACTTATTGCCACTCATAGTGAAACATATCATTGG	KNTLPYKKRIENCTLEEAGYLINNLEDVFSTAPKESSRGHIICNLSELIVAFGLVHATASEDQDYSSEDFPETAKNAVECFKYLKILLENLNPHERAYKRFFLIDTILLIATHSETYHW	NA	NA	NA	115
TRINITY_DN12986_c0_g2_i1	type:internal	513	CTACTTTCATATCAATTTCGAACCATGTTTAGTCATGTATTGCAAGACAAGCCATTAAAAGAGCTTGCTTTGAATGATTTTCATACAGAAAAGGGAGCCAAGTTTGGTGGATTCGCAGGATATCGTATGCCTCTTTATTATTCAGATTTAAGCATTACTGAATCCCACCTACACACAAGATCTCAAGTAAGTGTGTTTGATGTTTCACATATGAAGCAGATGTTTTTAAGAGGCCAAAATTGCGGCAAATTATTGGAAACTTTAGTTGTTTCTGACTTAGAAGATTTGGAATGTGATCAAGGAACCCTCACTCTTCTTACTAACGATAATGGAGGGATAATTGATGATATGATTATCACAAAATGTTATAATGATGAGTGGTACATTGTTTCAAATGCA…	LLSYQFRTMFSHVLQDKPLKELALNDFHTEKGAKFGGFAGYRMPLYYSDLSITESHLHTRSQVSVFDVSHMKQMFLRGQNCGKLLETLVVSDLEDLECDQGTLTLLTNDNGGIIDDMIITKCYNDEWYIVSNAAYADKVENIFRNKVNEWNKAKGDNITFDAPSNTALLAF	Aminomethyltransferase_folate-binding_domain|PF01571.19;Alpha-acetolactate_decarboxylase|PF03306.11	NP_001090416.1	119	122
TRINITY_DN12994_c0_g1_i1	type:3prime_partial	375	ATGTACACTGATGAACCTGGTACCACATTTAGCCAAAATAATGCAAAAAGCTGCATCCATGCACTTTTGAAAAATCGTGAGCAAAATCCAGTTTTGAATAAATCGCCTTCAATCAGCGTAAGTCAAGATCTTACATATTTTAACCACAATCTTGGAGCATCTTCTGATTTAACAAACTTGGAAAGTGCAGCATCCCAAGAATTTGATCAGCTACCTGGTTATTACAAGGGATCCGAAAATAACTTGTCAGAAAATTTAAACAACCAAAACGATTTCAACTATTCTCAAAAACTGTTTCACATTGCTGACGGAAATTTATACAGCATATTTTCGCCAATACAAGGGAGGAGTTACGGGATGAAGCAGATCGGAAGA	MYTDEPGTTFSQNNAKSCIHALLKNREQNPVLNKSPSISVSQDLTYFNHNLGASSDLTNLESAASQEFDQLPGYYKGSENNLSENLNNQNDFNYSQKLFHIADGNLYSIFSPIQGRSYGMKQIGR	NA	NA	NA	140
TRINITY_DN129_c0_g1_i1	type:3prime_partial	696	ATGAATCCTCCAGAGTCAGGGCCAATGATAGTTCATTGTAGTGCTGGTGTTGGTAGAACTGGTTGTTTTGTTGTGATCGATTCAATGTTAGAGAGGCTGAAAAATGAAAGCACTGTTGATATTTATGGACATGTCACCTGCTTACGAGCCCAGCGCAACTATATGGTTCAGACTGAAGACCAGTATGTCTTCATACATGATGCTGTTTTAGAAGCTGTTATAGCTGGCAATACTGAAGTTCCTGCGCGCAATCTCTTTGTTCATATCCAGCAATTGATGCAAGTAACTCCTGTGGAAGGATGTACTGGAATGGAGTTGGAGTTCAAGAAATTGGCAAACATGAAGACTCAGTCCAGTAAATTTGTTAGTGCTAATTTGCCTGTGAATAAATTTAAAAAT…	MNPPESGPMIVHCSAGVGRTGCFVVIDSMLERLKNESTVDIYGHVTCLRAQRNYMVQTEDQYVFIHDAVLEAVIAGNTEVPARNLFVHIQQLMQVTPVEGCTGMELEFKKLANMKTQSSKFVSANLPVNKFKNRLMNILPYESTRVCLQPIRGVDGSDYINASFIDGYKYRNAYISTQGPLPETTEDFWRMLWEHNSNIVVMLTKLKEMGREKCHQYWPNERSQRYLYYVVD	Protein-tyrosine_phosphatase|PF00102.25;Inositol_hexakisphosphate|PF14566.4;Dual_specificity_phosphatase,_catalytic_domain|PF00782.18;Tyrosine_phosphatase_family|PF13350.4	ABN41557.1	397.1	382
TRINITY_DN13012_c0_g1_i1	type:internal	654	GCTGCAGATGTAAGAAATCCTGATATTTTAGCTCTCACTCCACCTCAAGGAGAAAGAGACATGGAGCCTGGTAGTGTTGATGTCAATGTACAAGGACCTGGTGGATTAACACCACTTATGTGTGCCTCTTGCCGAGGTGGTGGAATTGATATTTTGGAAGATGGAGAAGATGAAGAAGGAGCAAGTGGAAACATGGTCCAAGAATTATTAATGCAAGGTGCTGACTATCAAATGACTCTAGATAAAACTGGAGAATCATCTTTACACTTGGCTGCTAGATATTCTAGAGCAGATGCTACAAAAAAACTTCTAGATGCTGGTTGTGATGCAAATGCCAAAGATATAACTGGACGCACACCTTTGCATGCTGCTGTTTCTGCAGATGCTATGGGAGTCTTT…	AADVRNPDILALTPPQGERDMEPGSVDVNVQGPGGLTPLMCASCRGGGIDILEDGEDEEGASGNMVQELLMQGADYQMTLDKTGESSLHLAARYSRADATKKLLDAGCDANAKDITGRTPLHAAVSADAMGVFQILLRNRATNLNARMNDGTTPLILATRLAIEGMVEELVNAEADVNAADDHGKTALHWAAAVNNYDAIRVLIAHGANKDAQDNKEE	Ankyrin_repeat|PF13606.4;Ankyrin_repeats_(many_copies)|PF13637.4;Ankyrin_repeat|PF00023.28;Ankyrin_repeats_(3_copies)|PF12796.5;Ankyrin_repeats_(many_copies)|PF13857.4	BAF42030.1	323.2	344
TRINITY_DN13029_c0_g2_i1	type:internal	324	CTGGCTATCTACGACGCCGTGTGGATTCTGTCGAAGGAAGAGACTTTCTATCAGGTCTTCTTCCCGTGTGAAGGACCTGGAATGGAGTGTGACTTCGTGCTGCAGTCCATCCAGAACAGAGGGATTGGAGAGAAAGGACTCTCCACTGTGGGAATTATGCCCTGCGATGTTTTCTATCGTGATTACGGTGAAGACGATGAGGATCAAGGAGAAGACTCAGACAATGAAAACGGAGACGAAAATCAAAGTCCAGATAAAAAAGGGAAAGGATTCAAAGCAATGCAAAAGGAATTTTTGAAGTCAGTGACGGCAGATCGGAAGAGC	LAIYDAVWILSKEETFYQVFFPCEGPGMECDFVLQSIQNRGIGEKGLSTVGIMPCDVFYRDYGEDDEDQGEDSDNENGDENQSPDKKGKGFKAMQKEFLKSVTADRKS	Centromere_protein_B_dimerisation_domain|PF09026.8	NA	NA	132
TRINITY_DN13038_c0_g1_i1	type:internal	723	TTTTCTTTTTTGCATTGTGTTGATCAAGATCAAGTTGTTGATGTTGTTACTTCTATGCATGACATAGATGTTTGTGGACGCAATTTAATAGTGCGATCATCAGATGAAACTTTGCAAAAAGCTATTGAGGAGTCTTTAGTAAAAAATGGTGTGTTGGAAACTCTGCATCCTCGAAATAAATGTAATCAAATCACTACTAGTTCAAATTCCTTTTCTAAAACGAAATTTTCCAAAGATAATGAAGCTACGACCATCGGGTACTGGTCAAATACTGACGCAAATAGTTCTAAAACTCAAAACACCTATACACAAAATAATTACCAAACATCCACTGAACAAAATTATGATTCTGTTAGTTCTCCTGGATCTCATTACTATTCTAATACTAGTGGGCCAAAG…	FSFLHCVDQDQVVDVVTSMHDIDVCGRNLIVRSSDETLQKAIEESLVKNGVLETLHPRNKCNQITTSSNSFSKTKFSKDNEATTIGYWSNTDANSSKTQNTYTQNNYQTSTEQNYDSVSSPGSHYYSNTSGPKFPEKHESDYSRDYFAASEEKGRYDNNKSTEIPQCHGYNEDLMKNINPLETFLKYAKPKSDSTDPLTMSDKFAAYSPKSYNQQNAYNGKVGGRNAHQNVEYGDGHPVHR	Lysine-rich_CEACAM1_co-isolated_protein_family|PF15686.3	NA	NA	239
TRINITY_DN13050_c0_g1_i1	type:internal	378	CATTCCTTTTATTTCCAGGTCCTAGTAAATATATTCCAATACCTTAATATCAGTAACAGATTAACTGCCTCAATGGTATGTAAGAGATGGTTCTATACCATCAACTGCCACAAGCTCCTCCAAGATGTGAAAGTTTCATTTTTAAAAGAAATTCCGAATGTTTTCGAATCTTCTCTCATGACCCGAAAATTTGAGTGGTTTGTATTTGATGAAATTCCGATTAATGATTCTTTTGTAGATTTCTTAAAACGATACAGCAAACAGTTTGTTAAATTGAAATTTGTTGACTGTAAAATGCTTAGTGACAAAAAGAAATTAAAATATCGTGAAAGCTTCCTAAAATGTGATAATTTAAAGTACTTGGAAACAGAAAGTTCT	HSFYFQVLVNIFQYLNISNRLTASMVCKRWFYTINCHKLLQDVKVSFLKEIPNVFESSLMTRKFEWFVFDEIPINDSFVDFLKRYSKQFVKLKFVDCKMLSDKKKLKYRESFLKCDNLKYLETESS	F-box_domain|PF00646.31;AAA_domain|PF13173.4;Domain_of_unknown_function_(DUF3535)|PF12054.6;F-box-like|PF12937.5	NA	NA	102
TRINITY_DN13051_c0_g1_i1	type:internal	384	CAGATTAGTCAAAAATTGAGGAACACGGGAGAGATCAATCAAGAGTCAAAAGTTTTTGAGACTGGAAAAATTTCAACGAGTAGGAATGTAGCTGGTGGGGATAATGAAAATCATAGCATTAGTGACAAACCACATGAAATAAAGCTTTCAGATTCTAATATTAATCCTCTGTCTGCAAAATTTGAAAACCTCGGTAATTTTAATAAAGAGGCTATTGCCGAAGATTTTAAATTAAAACTTGATCCCCTCAATACTTCTCAAACATTTTTTAAGCAAAATCCCAAATATTCGGATATTAGCATCCCTAATAAACATTTAGCTGATGATAGTTCTATTGATGTTACAAAGATAATTACAACGAAACAAGATACAAGCAAATCGTTC	QISQKLRNTGEINQESKVFETGKISTSRNVAGGDNENHSISDKPHEIKLSDSNINPLSAKFENLGNFNKEAIAEDFKLKLDPLNTSQTFFKQNPKYSDISIPNKHLADDSSIDVTKIITTKQDTSKSF	NA	NA	NA	164
TRINITY_DN13053_c0_g1_i1	type:internal	366	GCAATTAGTATGCCAAATGAGGTTATTGTCCCTAGTGGGAGCAGATATCTTCTACAATATGATTCCTCTGAAGGACTACAAGCCATTATAACACCCAATGGACACAAACATGAATTAGCTTTCCAAACATCTTTGGGTTTCTACAAGTTACTTTATCTTAGTCCTGGTGTGCGATTCCCATTTGTTACACATTTTGGAGACAATGGCCGATTACTAGCCAAACTATATCCTGAAAACAGTGGCCGGGTTGTATATTTGTACAATGAAAATGGCAATATTCAAACTGTGTTCTGTGGCCCAGAGAGGACAGATTTTTCTTATGTTGAGCAGAAAACTCTAGTTCGATCATGGACCAAGACTGTTCCA	AISMPNEVIVPSGSRYLLQYDSSEGLQAIITPNGHKHELAFQTSLGFYKLLYLSPGVRFPFVTHFGDNGRLLAKLYPENSGRVVYLYNENGNIQTVFCGPERTDFSYVEQKTLVRSWTKTVP	RHS_Repeat|PF05593.12;Domain_of_unknown_function_(DUF1936)|PF09151.8	XP_001656056.1	107.1	110
TRINITY_DN13069_c0_g1_i1	type:internal	348	GAAAATGTTAATAACTCAACATTGCTGTTAAGTGAGCATTCTTCATTGCAAGAAAATGAAAAGGTTTATATGTCTGAAAATAACAAAGAATTAACATTTAGAAAGGTACCAGCAATGTTATTGAAATATGATTTGAATTCCTGTGATATAAAAGACTTACAAAAAATGATACAGGAACTCATAGATGAAAATCAAAAACTAAAAGAAAGTTTTGAACTTCAAAATGTCGAATTTGCTAAGTATATAACTGAACTGCATGAATCCTTAAATGAGTTAAAAGAAGAGAGAAATAATTTAAGCTTAGTTTTACAAAGTGTTGAAACTCATCCTCAAGAGATTGACAGATCG	ENVNNSTLLLSEHSSLQENEKVYMSENNKELTFRKVPAMLLKYDLNSCDIKDLQKMIQELIDENQKLKESFELQNVEFAKYITELHESLNELKEERNNLSLVLQSVETHPQEIDRS	Spc24_subunit_of_Ndc80|PF08286.9;Swi5|PF07061.9;GIT_coiled-coil_Rho_guanine_nucleotide_exchange_factor|PF16559.3;Protein_of_unknown_function_(DUF972)|PF06156.11;TSC-22/dip/bun_family|PF01166.16;JNK-interacting_protein_leucine_zipper_II|PF16471.3;Protein_of_unknown_function_(DUF1192)|PF06698.9;NF-kappa-B_essential_modulator_NEMO|PF11577.6;Protein_of_unknown_function_(DUF3573)|PF12097.6;Septum_form…	NA	NA	100
TRINITY_DN13092_c0_g1_i1	type:3prime_partial	369	ATGAAATCGGCTATTTTTAGATTACGCTATTCGAAGGCGAAGACAGTTGAGCAAATGTGGTACACGTGTTGGAATCCGCCAACCTCATCTAGACTGTGCAACTGTGTCCCGAATGCAAGAGTAAGAATTATAATAAATGTTTACGAAGCCACCCGGCTTCAACCCTTCCCCTATCCTTACTCTAAAAACCAAAAAAAGAAAGAAGGAAAAAATATGAAAGAAAACATTTTTGGTGGAAACATGCATTGCATTAAATCGTCTCACGTGCTACGTTGTGGCTTAGCCCCCCTTTTTCTCTTGCCTCCGTCACATCTCTTCAGCCTCCAAGCTGCGGTTTATTTTACGACGGGAATACGGCAGATCGGAAGA	MKSAIFRLRYSKAKTVEQMWYTCWNPPTSSRLCNCVPNARVRIIINVYEATRLQPFPYPYSKNQKKKEGKNMKENIFGGNMHCIKSSHVLRCGLAPLFLLPPSHLFSLQAAVYFTTGIRQIGR	Pestivirus_envelope_glycoprotein_E2|PF16329.3;Deltaretrovirus_Tax_protein|PF05599.9	NA	NA	175
TRINITY_DN1309_c0_g1_i1	type:5prime_partial	429	GAAAACTTCTTTTTACAAGTGAATCTAACTATTCCGGACGTAACTTCTTGGGGAAAATATGATCTCGAAGGAAAACTTTTGAAAATATTCCCTTTGAAGGGTGCTGGAGATTTTCAGATAAATGTAACTGAAGGAGAAATTTCAGGAGTTGGACAGTTAGAATTCGTTAACAATACTTTGCAAATGACTAAACTGGAATTAGACTTTACCTGGAAAAAACTGTCTATTTACCTAGAGAACTTTCTCGGAGGTGGAAAGTTTTCCGAAGTTTTGCAAAGACTAATTCCACGCGCAGGCAAAAGTGTTTTTGATAATTTCAAGCCTAAAATACTTAAACTGATGAATAGAGCTTTGATAGATGAAGTCAACAAACAATTGAGAAAGCCAGAAGTTCAAAAA…	ENFFLQVNLTIPDVTSWGKYDLEGKLLKIFPLKGAGDFQINVTEGEISGVGQLEFVNNTLQMTKLELDFTWKKLSIYLENFLGGGKFSEVLQRLIPRAGKSVFDNFKPKILKLMNRALIDEVNKQLRKPEVQKIIEGILPGA*	Haemolymph_juvenile_hormone_binding_protein_(JHBP)|PF06585.9	XP_972731.1	57.8	312
TRINITY_DN13107_c0_g1_i1	type:internal	381	GCCTTGCATCTTGAGGAAAGCTGCATCTCTATTGAGAATCAAGACACGAGTTTTGATATTAGCCATCTGGATTTAAATACCGAATCTACAGATATTGAAATTAGTGATCAGTCTCATCCATCTAGTTCTACTGAATTTGTGAACGCCTTGCATCTTGAGGAAAGCTGCATCTCTATTGAGAACCAAGATACGAGTTTTGAAATTAGCCACCTGGATTTAAATACCGAAGGTACAGATATTGAAACTAGCAATCAGTCTCGTTATTCTAGTTCTACTGAAATTTTGGGCATCTTAGATCTTGAAGAAAATAAAATGTCTATTGAGAACGAAGACACTAGTTTTGAGACTAGCCATCTAGAATTAAATACAGAGTCCAGATCG	ALHLEESCISIENQDTSFDISHLDLNTESTDIEISDQSHPSSSTEFVNALHLEESCISIENQDTSFEISHLDLNTEGTDIETSNQSRYSSSTEILGILDLEENKMSIENEDTSFETSHLELNTESRS	Exosome_component_EXOSC1/CSL4|PF10447.7	NA	NA	148
TRINITY_DN1311_c0_g1_i1	type:5prime_partial	324	CAAGCTCATAACACAAGGAAGGATACAGAAGGTATTCAAAAATTAAAGGATTTAATTGCTTGCCAGGTTCCTTTATTAGAGGCAGGCATAGCTATTCACAAACAGAAAGCTCCTGAAAGCTTAAAACCATTTCATCAGCATATGGAAGAAGCATTTTTGAAACTTCGAACAAGTATTGAAGAAAAATATGGAAAAAAGGAAATACCTCTTGAGTTACAAGAACGTGTTCCAGTAACTATTAGAAGAATGAAAAGTACTCCTCCTAAGTCTAATAGCATTTCTGAGCGACTTTCAGATGCATCTAGTTTTACTTCAGAATCGTGA	QAHNTRKDTEGIQKLKDLIACQVPLLEAGIAIHKQKAPESLKPFHQHMEEAFLKLRTSIEEKYGKKEIPLELQERVPVTIRRMKSTPPKSNSISERLSDASSFTSES*	Dock_homology_region_2|PF06920.11;LigT_like_Phosphoesterase|PF02834.14	XP_001658481.1	87.4	96
TRINITY_DN13146_c0_g1_i1	type:5prime_partial	528	GAAACAACACGGAGCCATGTTCTTGAATTTGGAGATTTGAGTATTAGTCAATTACATGTAAGTGAATTTCAAGGAAGAAAAGTGTCCAAACCTATCATTCTGCCAAAAGATGAGATGGACTTGGTTCGAAGCCATGATGTGCCTATCGAAATAGTCAGGAGAATATTACTGAAATCAGATACATTACATGAAGAGGAACAACTGTCACTTTCGAAGAAACTTCATAAAATGCTCCAGAACCGACAGTTCCTGTCTCAGAAAGTGTCGGAGATTGTCTCAAAGATTTACAGTGACAAAATGGATCAGACGGATGTCATGGAAAATCAATACAAGCTGAAAAATTTCGAATGTTACGATGAAGTGCGAACCTTCTTCAACGACGAATGCTTTTCTCTTCCT…	ETTRSHVLEFGDLSISQLHVSEFQGRKVSKPIILPKDEMDLVRSHDVPIEIVRRILLKSDTLHEEEQLSLSKKLHKMLQNRQFLSQKVSEIVSKIYSDKMDQTDVMENQYKLKNFECYDEVRTFFNDECFSLPKNEHALDFMHVLVNFCEKGVSPYRIMNAMEEVCIHPPMYGIV*	Dehydrogenase_E1_component|PF00676.18;DNA-sulfur_modification-associated|PF14072.4	AAS94231.1	147.1	119
TRINITY_DN13163_c0_g1_i1	type:5prime_partial	387	TTCTCTTCACGATTCACAAGTTTTTATTCACGAACAATGAATTATTCTTACACAAACACAAACAATGGGAAAAGTTGGGCGCCATTCTCTTCACGATTCACAAGTTTTTATTCACGAACAATGAATTATTCTTACACAAACACAAACAATGGGAAAAGTTGGGCGCCATTCTCTTCACGATTCACAAGTTGGCGGATTCATCTGTCCGAAAACATTCATCTCGCAAAGGCATGCGACCACAAGGAACCCGAGGTAGAGGATGAGACACATGAATCCAACCCTCCTGTTGAGTTTCCAACCGGCTACGCTGAAAGTGACAAACAGCAGGATGACAGTGGACAGAAGAGTGGCTGTGGTGTAGGTGAGTGCGGAACTGTTGATGATTAG	FSSRFTSFYSRTMNYSYTNTNNGKSWAPFSSRFTSFYSRTMNYSYTNTNNGKSWAPFSSRFTSWRIHLSENIHLAKACDHKEPEVEDETHESNPPVEFPTGYAESDKQQDDSGQKSGCGVGECGTVDD*	BNR/Asp-box_repeat|PF02012.18;ABC-2_type_transporter|PF01061.22;Ubiquinol-cytochrome_C_reductase,_UQCRX/QCR9_like|PF05365.10;Sodium/calcium_exchanger_protein|PF01699.22	XP_001648950.1	117.9	190
TRINITY_DN13163_c0_g1_i2	type:5prime_partial	429	AGTCATACCTTTGGACTTCCTGATTCTGTGGCTGGAATCACAATTTTAGCAGCTGGTATCAGCGTTCCAGAGATTATAGCAAGTGTTATTGTCGTCAAAAGTGGAATGGCCAACATGGCTATATGCAACCTGATTGGCAGCAACATCTTTGACATCCTTTTCTGCTTGGGGGTTCCATGGTTCATCAAGACCTTCTTCGTCTCCAAGACATCAAGTCTAATCATCAACAGTTCCGCACTCACCTACACCACAGCCACTCTTCTGTCCACTGTCATCCTGCTGTTTGTCACTTTCAGCGTAGCCGGTTGGAAACTCAACAGGAGGGTTGGATTCATGTGTCTCATCCTCTACCTCGGGTTCCTTGTGGTCGCATGCCTTTGCGAGATGAATGTTTTCGGA…	SHTFGLPDSVAGITILAAGISVPEIIASVIVVKSGMANMAICNLIGSNIFDILFCLGVPWFIKTFFVSKTSSLIINSSALTYTTATLLSTVILLFVTFSVAGWKLNRRVGFMCLILYLGFLVVACLCEMNVFGQMNPPTCES*	BNR/Asp-box_repeat|PF02012.18;Ubiquinol-cytochrome_C_reductase,_UQCRX/QCR9_like|PF05365.10;Sodium/calcium_exchanger_protein|PF01699.22	XP_001648950.1	157.5	166
TRINITY_DN13205_c0_g1_i1	type:complete	513	ATGCTTCTAAAAGGTTGTATTTTCTTTCTAGTCATTGCTTATGCTTCATCCGAATATGTCAATACTTTTGACTGTCCTAATGTAACCGCTCATTCTAAGGATGTGCTCATGCAAGTTTCTGATTGCAAGGCCAGTGATTCTCACTGCCCCTTGTATCAAGGAAAAACCCACAAAGTAATATTCGATTTTGTTATGTTGAAAAATTATACTGGAAAGATCGATTTCCGTGTTTTTGGAGTATTTGAAAAATTCACTGTCCCATATCGAGGCAAGGCCGACGCTTTCGAAAATGCTACTTACATAGATAACGGCGAGAAGTTAAAAGATGCAGGAATCTTTTTGACTAATAGGCCAATCAGACACGAGTCTGAATTTGCTGTATCTCCTAACTACCCAAAG…	MLLKGCIFFLVIAYASSEYVNTFDCPNVTAHSKDVLMQVSDCKASDSHCPLYQGKTHKVIFDFVMLKNYTGKIDFRVFGVFEKFTVPYRGKADAFENATYIDNGEKLKDAGIFLTNRPIRHESEFAVSPNYPKINLKVRFSIVERRTKEVLMCREIPVGIQSPPSEGNTV*	ML_domain|PF02221.13	NA	NA	13186
TRINITY_DN13207_c0_g1_i2	type:internal	441	CTTATTGAAGAATATGGCTTCGGTAAATGGTCAAAAATATCCAAAGAAATGAATGGCCGAACAGACAACAATTGTTTAATTCGTGCTAGATGGTTGGGAATCAAACCGATTACTAATAAGAATGGAAATAGCAGTGATGAATGTCCTACTGGTATTAAAAAGTATAAAGGGAAGTATGCAAAACGAACGCGCCAGAGAAAAAGTTCAAAACTGGCTATTCAAATCGCAGCAAATAAAACTTTGCAAGAAGCATTAAAAGAAGTTAGGACAACTCAAGAAGAAAATGTGGATTTGGAAACTTTAAATTTGTCTTCGATCAGCATTACTGCTCTTAGAGAACTTCACGCAGAACTTCAAAAAAATGAACGTAGCTGTAAAGAAGTTACTTGGAAACCCCGA…	LIEEYGFGKWSKISKEMNGRTDNNCLIRARWLGIKPITNKNGNSSDECPTGIKKYKGKYAKRTRQRKSSKLAIQIAANKTLQEALKEVRTTQEENVDLETLNLSSISITALRELHAELQKNERSCKEVTWKPRYLSLDGVNKKDFTR	Myb-like_DNA-binding_domain|PF13921.4;Coiled-coil_domain_of_unknown_function|PF14916.4;Myb-like_DNA-binding_domain|PF00249.29	NA	NA	164
TRINITY_DN1320_c0_g2_i1	type:internal	378	CTTTTACAAGATATGGATGTGAATCGGCTTCGGGCAGTTATATATCGAGATGTGGATGAAACAAAACAAGCACAATTTTTGGCTTTGGCTGTTGTTTATTTTATTTCTGTCTTGATGGTTTCCAAATATCGAGATATATTAGAACCTCCACCTCCTCCATCATCATTTACTTCTCGCCAAAGTACTAATTCTGAAATGCAACATTACACAACTTCTGCTACCATGTCTTCATCAGCATCTCAGACGGTTGTTGATTCAGAGGTTAAAACAAATGGACAATTGACTGAATCTGCATCTGTTTGTAATGAAGATGGTGAAGATGAAGTTATCATAGTCGAAGATACAGATTCTAGTATACTTGCTCATTTACATTCTTCT	LLQDMDVNRLRAVIYRDVDETKQAQFLALAVVYFISVLMVSKYRDILEPPPPPSSFTSRQSTNSEMQHYTTSATMSSSASQTVVDSEVKTNGQLTESASVCNEDGEDEVIIVEDTDSSILAHLHSS	GMC_oxidoreductase|PF05199.11;Chitinase_A,_N-terminal_domain|PF08329.8	XP_001657059.1	98.2	78
TRINITY_DN1323_c0_g1_i1	type:internal	324	ACCTCCTCTCATGGCTCTATTACTGGAACCTTTGCTGGTCTTTCAGATATTCCTTGGAACGAACTACCCACCCCACCTTACCCACAGCATTTAGTTCCAGCCTCTGTATCCACTACTACTTTTCCAAGTCGGCCAGAAGATCAACTTGCACCTCTCGTATCTTCATCAGTATTAACGCCATCGTTGTTCAGTCCCGGCCCTCCTCCTCCGTCACAGCAACTCGTGACTGAAGATTATCTGGGATTATACTATGAATCTGCACCATCTTCATCAAAACAACTTTCTCAGGAATTCAAACTTCCAAAGCTAGACCAAGAACTCTTC	TSSHGSITGTFAGLSDIPWNELPTPPYPQHLVPASVSTTTFPSRPEDQLAPLVSSSVLTPSLFSPGPPPPSQQLVTEDYLGLYYESAPSSSKQLSQEFKLPKLDQELF	NA	NA	NA	118
TRINITY_DN13241_c0_g1_i1	type:complete	924	ATGGATGAAGTTGGAGGAATAAATTTGGGAGCTTTACATTCAGGTCTTAAAGCTGTAAGAGCTTTAAGAAGTACTGTTTTAGAAGTATTTAAGTTATTAGGTGATGGCGCAACTGCTGCTTATGGAGACGAAGAGCGTGCAAAATTTATCAATGAAGTCCAAACTACTCTTGCTAGTGTTAAGGTTCGAATGAGAGAACTGGAAACTGCTGGCACACTTTTAGGTTCTCCTAATCCACCTCTTAACCTTGGAAATTCTGGTTTATTGAGTCAAGATCCTGCATATGAAAAAACACCTTTATATTCAGAGTTAATCAAGTCACACCGTTGGTTTGACAAAGTGTATGAACTTAGTAGTCATGCGACTAGTATTTTCTCACAAAATTCATTAAAACGAGCT…	MDEVGGINLGALHSGLKAVRALRSTVLEVFKLLGDGATAAYGDEERAKFINEVQTTLASVKVRMRELETAGTLLGSPNPPLNLGNSGLLSQDPAYEKTPLYSELIKSHRWFDKVYELSSHATSIFSQNSLKRAHFSTLTSSKQMRLRPTGHNRPPQSVDLTTTSLTQYFPDIQMQVLKPYGNSTIIMVSVARTLKALIMLRGLIIDWVIVKGYNEEFYNENDKLDMWSGSRYLVFQKVTEHANAAMLHFYSPNLPELAVRSFLTWIRSYGNLFTAPCRKCGNRLHNNMPPTWRDVRNLDVYHESCKP*	Domain_of_unknown_function_(DUF4217)|PF13959.4;Mediator_complex_subunit_27|PF11571.6	XP_001652785.1	271.6	1031
TRINITY_DN13277_c0_g1_i1	type:5prime_partial	459	CACGCTGACGTCAAACCGGCAAACGTCATCGTAAGTCCTCACGGAATTTGCAAGTTAGGTGATTTTGGACACAGTTTCAATCTGGACTCGATGAGCACTGAGCCAAACACCCACCCTGTAGAAGATATCGTTGGGACAGCTGCTTATGCCGCTCCTGAGGTGTTGCGCGGGTCGCGACCTACTCCTTTCTCCGATATCTACTCTTTTGGTGTACTCTTGTGGCAAGTACAGAGCAGAGAGCTACCTTTTGCTGGAGAACATCCCCATGTCATCATTTACAAGGTGGCTCATTATGGAGCAAGGCCAAGTTTTGTTGGCATCAAGAGTCCTTTAATGCTTCAATTTTCCGAAGTGGCAAAGCTTTGTTGGTGTGAAGTTCCAAGCACGAGAATAATTCCT…	HADVKPANVIVSPHGICKLGDFGHSFNLDSMSTEPNTHPVEDIVGTAAYAAPEVLRGSRPTPFSDIYSFGVLLWQVQSRELPFAGEHPHVIIYKVAHYGARPSFVGIKSPLMLQFSEVAKLCWCEVPSTRIIPSQAHKMLQDLAQQSKAITK*	Protein_tyrosine_kinase|PF07714.15;Protein_kinase_domain|PF00069.23	CAA37128.1	96.7	178
TRINITY_DN13289_c0_g1_i1	type:complete	537	ATGGGGCCTCTTCTCCTTTGGATTGGGCTTTTGGTACCGAGTCTCGTCTATGGAGGTGCAACTTTCTCGGATTGCGGAGACGAGAACAAAAGCTTAGCTGTTAAAGCGGGTTCGGTGAAACCAGATCCCATTCGATATCCCGGAAACATTTCAATCACAGTGCGTATGGATGTGGTGAAGGACCTGCCTGCTTCCAATTTCGAAATGAAGTTGAATTTGGTTAAACTACAGCCAAGAAGAATGGTTGTACCATGTTTACAAAATATTGGATCCTGCACGTATGATGTCTGCGAGATGATTACGAATCATAGGAGCGAGTTCTGTCCAATGTTTCCGAACCCCGACGAATGTGGCTGTCCCATGAAAAGAGGATCCTATTCTATGAAGGATGCTCCTGTG…	MGPLLLWIGLLVPSLVYGGATFSDCGDENKSLAVKAGSVKPDPIRYPGNISITVRMDVVKDLPASNFEMKLNLVKLQPRRMVVPCLQNIGSCTYDVCEMITNHRSEFCPMFPNPDECGCPMKRGSYSMKDAPVALPNFGEIFAKILQGDYEGNITFIDKSSNKQLGCIAIGFQIEPSV*	Protein_of_unknown_function_(DUF3649)|PF12365.6;ML_domain|PF02221.13	NA	NA	83329
TRINITY_DN13316_c0_g1_i1	type:internal	372	ATCCTCCTTACTTTGATAGGAAATACAATTATCGTGCTCGTCTTATCTTTATCTCGATATCGAAACCGTTCCTCCAGAGTAAACATCTTCATTCTGAACCTAGCAATTGGTGACTTAGCAGTCTGTTGTATTACCATGACGTCAGAACTTCTTTTCGAGGTGTTTGGAGAATGGAAACTTGGTCCAATAGCCTGTAAGGCTATTGTATACGCTCAAATCGTAACCTTGGCAAGTACTACTTTCATTCTCACTTCGATGAGCTACGACCGCTACTTGGCTATATGTCGTCCTCTCAGAACAACTGGAGGAGTCACACAAGCAAAACGACTTATAATAGGATCCTGGCTCTTAGCATTCCTTTTGGCTATCCCT	ILLTLIGNTIIVLVLSLSRYRNRSSRVNIFILNLAIGDLAVCCITMTSELLFEVFGEWKLGPIACKAIVYAQIVTLASTTFILTSMSYDRYLAICRPLRTTGGVTQAKRLIIGSWLLAFLLAIP	Olfactory_receptor|PF13853.4;Taste_receptor_protein_(TAS2R)|PF05296.11;7_transmembrane_receptor_(rhodopsin_family)|PF00001.19;Major_prion_protein_bPrPp_-_N_terminal|PF11587.6	XP_525039.2	84	70
TRINITY_DN13316_c0_g2_i1	type:internal	435	CGCCTTCATCATGATGAGGTGAAAAGAACTGTCAACGGTACCAAAAGCTATAAAATCCTCATTCAACAAGGTGACACTATGGCTTTCCGTATGTCCCTATGGATCCTGTTCATATTGCCAAAGATCTTAGTAACTGCTAATGTTACTGATGTCTTCAATGACACTTCACCAAATGCTACTGTTTGGCCGAAAAACGAGTGGAGTGGAGCTGTCATCCAACAGGTGTTTGGAGAATGGAAACTTGGTCCAATAGCCTGTAAGGCTATTGTATACGCTCAAATCGTAACCTTGGCAAGTACTACTTTCATTCTCACTTCGATGAGCTACGACCGCTACTTGGCTATATGTCGTCCTCTCAGAACAACTGGAGGAGTCACACAAGCAAAACGACTTATAATA…	RLHHDEVKRTVNGTKSYKILIQQGDTMAFRMSLWILFILPKILVTANVTDVFNDTSPNATVWPKNEWSGAVIQQVFGEWKLGPIACKAIVYAQIVTLASTTFILTSMSYDRYLAICRPLRTTGGVTQAKRLIIGSWLLAFLLAIP	Olfactory_receptor|PF13853.4;7_transmembrane_receptor_(rhodopsin_family)|PF00001.19;Major_prion_protein_bPrPp_-_N_terminal|PF11587.6	XP_525039.2	56.6	120
TRINITY_DN13334_c0_g1_i1	type:internal	327	GAGGATTGGGCAGACGAGGAAATGACGGACCATCAGATGGATGCCATCATCGGCGAATGGCAGGATGAAAACGAACGGAACGAGTGGTTGCCGAACGAAGAAGAGTACGAGAAAGAACTACCTAAACCAGAATTTCCAGAAATCCAGGTGAAGGAACCACCTGAAATTAAGGAAGAACTCGATTTAGATATAAACTTCAAACCTCCTCCGTCTCCCAGAGAGCCTATCGAGTATGAAACATCTTTGACTCTGACTGTGGACACGAGTGAGTTAGATAGAACTAGAGACAGGAGGCCGAGTGTCTTGTCTACCAAAGGCACGATCGAC	EDWADEEMTDHQMDAIIGEWQDENERNEWLPNEEEYEKELPKPEFPEIQVKEPPEIKEELDLDINFKPPPSPREPIEYETSLTLTVDTSELDRTRDRRPSVLSTKGTID	NA	NA	NA	36
TRINITY_DN13346_c0_g1_i1	type:internal	573	TTTTACGCTCTGGTGGTAATGGCATTGTTTGTAAACTTTCGTTTTCGTTCACTAAACTTGTTATTGTTTGTGTATGTTTCTTTTATAAAGCACATTGATCTTTCTTATGCCTATATCAATGTTCTATCTCCCTTTGCATCTGTGATAAAAGCAGACTTGGGCACTCATCTTATTTTACCTTGTAATGTCAGTGGCAAGCCACGCCCTCGCATTTCTTGGCTAAAAAATGGCCAGCTCCTGTCTCTGAATTCAAGCAAAGGGCACCCATTTTTGGATCGAAAAGCTCTTTTATTTTATCCTTTGCTCCCTTCTGATAGTGGAAACTACACATGCTTGGTTAGTAATCTGTATGATTTGAAAGAGCTCAACACAGAACTACATGTCAAAACCCCTCCTGGT…	FYALVVMALFVNFRFRSLNLLLFVYVSFIKHIDLSYAYINVLSPFASVIKADLGTHLILPCNVSGKPRPRISWLKNGQLLSLNSSKGHPFLDRKALLFYPLLPSDSGNYTCLVSNLYDLKELNTELHVKTPPGKLKNVTVHPSTVVATVRWHVDNDGGYPITNFTLLYRPTKANASESWHMPQPLHVSPVV	Immunoglobulin_V-set_domain|PF07686.15;Fibronectin_type_III_domain|PF00041.19;Immunoglobulin_domain|PF13895.4;Immunoglobulin_domain|PF13927.4;Baculovirus_protein_of_unknown_function_(DUF843)|PF05814.9;Immunoglobulin_I-set_domain|PF07679.14;Immunoglobulin_domain|PF00047.23;CD80-like_C2-set_immunoglobulin_domain|PF08205.10	XP_001891969.1	23.5	61
TRINITY_DN13356_c0_g1_i2	type:internal	726	GCAGGGGTGTCAAACTTGCAGCTCGTGGGCTGCATGCGACCCACGACGGACATTTTTGCAGCTAGATGGACTCCAGGTTTTCAACAAAATGTATATGCAAGTCGTATAAACACCACTCGAATGTTGGCTAATGAGATTCAAAAGATGGATGAACCCCCTAAAGTCTTTGGTGTTATATCAGGTGTTGGTTACTACAAACCTAGTGAGACAGAGACATATACTGAGGAGAATGTTGGAGGTGGTAATCATGATTTTTTTACTAAGTTAGCTGCTGATTGGGAGGAAGCTAGCACACTGCCACCACATTCTAGAGTTCGTCGCTTTATTGTTCGATCTGGTGTCGTCATTGGAAGGTCGGGAGGAATGATCAATCAGTTGTATCTTCCATTTTATTTCGGA…	AGVSNLQLVGCMRPTTDIFAARWTPGFQQNVYASRINTTRMLANEIQKMDEPPKVFGVISGVGYYKPSETETYTEENVGGGNHDFFTKLAADWEEASTLPPHSRVRRFIVRSGVVIGRSGGMINQLYLPFYFGLGGPIGSGNQLMPWIHIEDIAGIFVHGIQSENVHGVLNGVSPQIITNKEFTKALARAMWRPAFFPLPAFVLKLAFGDERASMMLEGQKVVPKRTLESGYKFVYPDINSA	Domain_of_unknown_function_(DUF1731)|PF08338.9;NAD_dependent_epimerase/dehydratase_family|PF01370.19	NP_001040495.1	239.6	267
TRINITY_DN13357_c0_g1_i1	type:complete	465	ATGTCTGAAGACCGGAGTGAATCCGTTGCCAGTTCCGGCGTAGCAGTACACAGACCTTTTTCCACTTTCCAGAGAATTTTTTTCTGGAATAACCGGAAACGCCCGCCAGAAAAGGCAGTGCGAGTAGTGCTTAACAATGCTACTTTGCCTGAAAATGTACCTGGGAAACATCACCCCCATCGTGGCTACGCCTGCAATCGGATACGCACGACGAAGTATACCTTGTTGTCGTTTATACCGAAGAATCTTTTCGAACAGTTCCATCGTATAGCCAATTTATACTTCATTGGTATTGTGCTTCTTAACTGGGTGCCAAAGATAAATGCTTTTGGCAAGGAAATTGCGATTATTCCAGTGATGTTTGTGCTTGGTGTGACTGCCATCAAAGATTGGTTCGAA…	MSEDRSESVASSGVAVHRPFSTFQRIFFWNNRKRPPEKAVRVVLNNATLPENVPGKHHPHRGYACNRIRTTKYTLLSFIPKNLFEQFHRIANLYFIGIVLLNWVPKINAFGKEIAIIPVMFVLGVTAIKDWFEDFRRYKSDKRINNLTCRVYNR*	Phospholipid-translocating_ATPase_N-terminal|PF16209.3	ABG02164.1	169.9	246
TRINITY_DN13361_c0_g1_i1	type:internal	456	TCATTCTTTGCTCAAGATGTGGAATATCCATTTACTCAAGCTTTTAAGACAGATGATGATTCAGGTACATCTGAAAATTTTTATTGCATAAACAGCCTTGAACAGTGGCTTTCACAGATTGGGTTACCTCAGTATGAAAATTTACTTGTTCTAAATGGATTTGATGACTTAAATTTCATGGGAGGAAACATATTAGAAGAAGCTGATCTTCAAGAAATTGGTGTGCATAATGCTATAGACAGACAAAAACTTTGCACTTTTGCTCAGAAGTTGCCTTCTATACAGCCTATAAACACTTACAGAGGAACTGAAAAATTTCCTAAAAGTGTTGATGAATGGTTTAAGTCAATCAATCTTATGGAATACAATGAAAATTTTTCTAACAATAATATCACTGAT…	SFFAQDVEYPFTQAFKTDDDSGTSENFYCINSLEQWLSQIGLPQYENLLVLNGFDDLNFMGGNILEEADLQEIGVHNAIDRQKLCTFAQKLPSIQPINTYRGTEKFPKSVDEWFKSINLMEYNENFSNNNITDMDRALKLWEVELNTVLKIT	SAM_domain_(Sterile_alpha_motif)|PF07647.15;SAM_domain_(Sterile_alpha_motif)|PF00536.28;SAM_like_domain_present_in_kinase_suppressor_RAS_1|PF13543.4	EAW97615.1	77.4	234
TRINITY_DN13364_c0_g1_i1	type:internal	333	CCTTGTTTCTGTTATGGTCATTCCACTGAATGTCAGAGTGCACCTGGATTTTATAGCAAACTTATTGAATCAAATTTTGACCGAGATTCAGAGAACTGGAAAGCTGTTGATTTAAGAGGCATTCAAATTCCTGTCCATTATGATGCTGATCTTCAGATAATTGAAGTTCGCGGACAAGGTGGAGAGTTTGCATATTTTGTGGCACCAGAATGTTATTTGGGAAATCAACGAGCCTCCTATAATCATTACCTCACTTTCACTTACCGAATTGGAGCTGAGAGTGTAAGAGTGAGTGCCCATGATGTCATCTTAGAGGGTGCTGGGCTTCGAGTC	PCFCYGHSTECQSAPGFYSKLIESNFDRDSENWKAVDLRGIQIPVHYDADLQIIEVRGQGGEFAYFVAPECYLGNQRASYNHYLTFTYRIGAESVRVSAHDVILEGAGLRV	Laminin_B_(Domain_IV)|PF00052.16	AAK55397.1	98.6	26
TRINITY_DN13365_c0_g1_i1	type:internal	516	GCATTTCAACATGATTTTAATGAGACAACTTATTTCAAACCAACATTCTGTGCCCACTGTGCAGGTCTTTTGTGGGGACTTATTAAACAAGGTTATAAATGTAGAGATTGTGGAATTAATGCTCACAAACATTGTAAAGAATTGGTCGTTATGGAATGCCGAAGAACATCTGGAAGTACTTCTAGATCAAATTCCTTTGCAGCTGCAGATGGTCCAAAACTTAAGACTCGAATGCAAAAACCATGGCGGCGGCAGTTTAAAAGCAGTCAATCTGATGGTGATTCTAGTTATAGCTCCAGAACTAGTACTGAAAGTGATGCTTGTAGTTGTGACAATGGTTTTGTGCTTGTGGATGAATCTCTACCGGGGAGTGCTAGAAATTCGGTGGAAATAAAAGAT…	AFQHDFNETTYFKPTFCAHCAGLLWGLIKQGYKCRDCGINAHKHCKELVVMECRRTSGSTSRSNSFAAADGPKLKTRMQKPWRRQFKSSQSDGDSSYSSRTSTESDACSCDNGFVLVDESLPGSARNSVEIKDYPRSPISKTPPSPVKTVSSPKSCSCKQEFKLPSPRLPAP	Glutathione-dependent_formaldehyde-activating_enzyme|PF04828.12;Phorbol_esters/diacylglycerol_binding_domain_(C1_domain)|PF00130.20;Coagulation_Factor_Xa_inhibitory_site|PF14670.4	NP_001137550.1	101.7	178
TRINITY_DN13371_c0_g1_i1	type:internal	366	AAACCAATGAATTCTGGAATAAAAATAGGAAAAAGGCATTATAAAATACTTGCGTGGTCCTCTTCTCAACTACGAGAACATGGCGTATCAATGTATGCAAAAGATTCCAACGGATTTACGGCATCTGATATACGAAAGTGGACAGAAATTGACCCTCGGACGACAATGAATATACCAAAGTGTTTAGCTAGAATAGGACAATGTTTTTCACAGACGGAAGAGACTTTGCATGTCCCTTTAAACAACATGCATGTGAAGTTTGAAAGAGACATAGAACAGGGCTTTAATCCATTGACATTCAAACCATATACGTTCTCTGATGGTATTGGTAGAATTTCTCAAGGCTTGGTTAAAAAGGTTTCGAAG	KPMNSGIKIGKRHYKILAWSSSQLREHGVSMYAKDSNGFTASDIRKWTEIDPRTTMNIPKCLARIGQCFSQTEETLHVPLNNMHVKFERDIEQGFNPLTFKPYTFSDGIGRISQGLVKKVSK	RNA_dependent_RNA_polymerase|PF05183.10;Herpesvirus-7_repeat_of_unknown_function_(DUF865)|PF05906.9	XP_001774552.1	87.4	104
TRINITY_DN13384_c0_g1_i1	type:5prime_partial	396	AGGACAAGAACCCTTTCTGAATCGGTGTCCACTACGGAAAAAACGATGACATCTCTATCCACCACCGTAGAACCTTATCTTAATACCCAGTTATTCCAACAGCAAAACCAGTTGCAGCAGCTCTTGGGAGGTGGTTCGCAGCTAGGAGGTACAGGTCCCTTGCCCCTGGCTCCACCTCCTCAGTATAGCACCGTGACGTCCACCTACACAACCGTAACAACTGCTACAAGCCTCAGTACGAGAATCTATACCCTGATATACAACGCCATCAGTACGAAATTCCGAACGGTGACCAGCACATCTTTGTATGAGACAACAATAACTGCAACCACCACCAGCGAAGTTCCCATCGCCATCACTGCACCCCCTGGAGGAGTGTTCCCCTTTTTGGGTTAA	RTRTLSESVSTTEKTMTSLSTTVEPYLNTQLFQQQNQLQQLLGGGSQLGGTGPLPLAPPPQYSTVTSTYTTVTTATSLSTRIYTLIYNAISTKFRTVTSTSLYETTITATTTSEVPIAITAPPGGVFPFLG*	Protein_of_unknown_function_(DUF3375)|PF11855.6	NA	NA	18
TRINITY_DN13393_c0_g1_i1	type:internal	534	CATCTATCAACTCATTGCCAAAGAATTCAAGATTTTTTTCTGCTCTTAGCAGTTTGTAATACTGTGGTTGTTGCAAAACATCCTCACAAAGACCAAATGAATTCTAGTGGCTTATTTCTAAATTTAACTCCAACACCTCTTCGACTAAGAGGCTCCTCTGAAGGATGGGATGTTTCACATGAGAAATATTCTCATTTATTGAGTGAAGTTAGCACACCAGCTAGCTCCACTGCTTCAACTCCTATTAAACGTCCTCGTAATCTGACTCTTCCACTTCATATGGGACTTTACCAAACACCAACTCCATCGCCACTTGAGTTTCGTCCCATATATGAAGCAGAGAGTCCTGATGAAATTGCCTTAGTAGAGACTGCATTTAATTACAACTGTAGGTTGTTG…	HLSTHCQRIQDFFLLLAVCNTVVVAKHPHKDQMNSSGLFLNLTPTPLRLRGSSEGWDVSHEKYSHLLSEVSTPASSTASTPIKRPRNLTLPLHMGLYQTPTPSPLEFRPIYEAESPDEIALVETAFNYNCRLLRRTPDTVVLSLPGEGLIEFRILHVLPFDATRKRMSVILQHPITAE	Cation_transport_ATPase_(P-type)|PF13246.4	XP_001658598.1	53.9	338
TRINITY_DN13401_c0_g1_i1	type:internal	423	GTCAATACAATTGGTGGATACAAATGCGAATGTTCCATTGGATTCGAGTTGCACTCGGATGGAAAGAGATGTGAAGATGCCTGCGGGGGCGTTCTGAAAGGGGAGCGCGGCGTCATCACGAGTCCATCTTTCCCTGATCTCTACCCTTCGAACAAACAGTGCATCTGGGAGATCGTCGCTCCTCCTCATTGCCGCATCACCCTCAACTTCACTCATTTCGATCTAGAAGGGACAAATCAAGAGTGCGAGTATGACAGTGTCGATCTCAGAACCAGACTCTCGCCCGACGAAGACTGGAAGAAGCAGGGGACCTACTGCGGATCCAGACTCCCCCCTGTTCTCACCTCGGAAGGAAGTGCGCTCAGGATCGAATTCGTCTCGGACAACTCGGTGCAGAAG…	VNTIGGYKCECSIGFELHSDGKRCEDACGGVLKGERGVITSPSFPDLYPSNKQCIWEIVAPPHCRITLNFTHFDLEGTNQECEYDSVDLRTRLSPDEDWKKQGTYCGSRLPPVLTSEGSALRIEFVSDNSVQKSGFAALFF	CUB_domain|PF00431.18;Calcium-binding_EGF_domain|PF07645.13;Complement_Clr-like_EGF-like|PF12662.5;EGF-like_domain|PF00008.25;Human_growth_factor-like_EGF|PF12661.5;Coagulation_Factor_Xa_inhibitory_site|PF14670.4	XP_970162.1	194.9	167
TRINITY_DN13404_c0_g1_i1	type:internal	486	ACCACTGATCAAGGGACCCCTGAGTTTCCAGAGGAAGAACTGTGCAGTGGAAAGCCCTTTGACGCCTTCACGGATCTCAAGAATGGGTCCCTCTTTGCCTTCCGAGGGCAGTACTGCTATGAGCTAGATGAGACGGCAGTGAGGCCTGGGTACCCCAAACTTATCCAAGATGTCTGGGGCATTGAGGGCCCCATCGATGCTGCCTTCACTCGCATCAACTGTCAGGGGAAGACCTACTTGTTCAAGGGTAGTCAGTACTGGCGCTTTGAGGATGGGGTCCTGGACCCTGGTTATCCCCGAAACATCTCCGAAGGCTTCAGTGGCATACCAGACAATGTTGATGCAGCGTTCGCCCTTCCTGCCCACCGTTACAGTGGCCGGGAAAGGGTCTACTTCTTC…	TTDQGTPEFPEEELCSGKPFDAFTDLKNGSLFAFRGQYCYELDETAVRPGYPKLIQDVWGIEGPIDAAFTRINCQGKTYLFKGSQYWRFEDGVLDPGYPRNISEGFSGIPDNVDAAFALPAHRYSGRERVYFFKGKQYWEYEFQQQPSQEECEGSSLSAVFE	Hemopexin|PF00045.17	BAB27809.1	348.2	206
TRINITY_DN13413_c0_g2_i1	type:internal	540	GCTGATAAACCAATTACATTTGTCTCTCAGCATGAAGATGTTGAAGAAACTATTGAAACTTCTCGTTTTACAACAACAACAACTGCTGCTCATAGAAATGAAACAGGCAGTTCTGGATCAAAAACTGTTTTACCTCAAAGATTAGATGATAATGTTCCATCGATATCTGGCAATACAATGGATGATAAATTTTTGTGTGTTGAAACAGCTGGGGAAAAGTATTCCAAAGATATCAGAAAAAGACGTTCTGCAGATCTAAGTGGCACAGACATAAAATTGCCTTTAAATTTAGGTCATCGAAGATCTGGATCATACGACTCTCCTCATTTGAAAACTCAAGAGGATTCAAATAGTGTTTCGGTGAATGTAAATAATGCCCCTGATGTATCAGACATATCT…	ADKPITFVSQHEDVEETIETSRFTTTTTAAHRNETGSSGSKTVLPQRLDDNVPSISGNTMDDKFLCVETAGEKYSKDIRKRRSADLSGTDIKLPLNLGHRRSGSYDSPHLKTQEDSNSVSVNVNNAPDVSDISSLDSIENNVTDEAFNNISYSGHYFFLLEPRLQPLPPVQCPESMEIYE	NA	NA	NA	74
TRINITY_DN13416_c0_g1_i1	type:internal	393	ATCATGCAAAGCGAAATCGTAATTTCAGGCATATCAGGAAGATTTCCCGAATCTGATGATGTTGCAGAATTCAGTCGAAACCTTTATCAAAAAAAGGATTTGATCTCTGAAAGCAAAAGATGGGAACCTGGATTGTATGATTTACCAAAAAGATCGGGACAGCTAAAAGATATCAGTAAATTCGACAATGAATTCTTCGGTGTGTCAGAGAAACAAGGTCATCTTTTGGAACCCCAAGGGAGGATACTTTTGGAAACTACCTATGAAGCAATTGTCGATGCTGGCTATGATCCAGAGGATCTACGGGGTGGAAACATAGGTGTTTTTATTGGTAATTCCAATTTAGACAGTCAACAATTCCTTCTTTTTGATACCTATTCTATTAATGAACGC	IMQSEIVISGISGRFPESDDVAEFSRNLYQKKDLISESKRWEPGLYDLPKRSGQLKDISKFDNEFFGVSEKQGHLLEPQGRILLETTYEAIVDAGYDPEDLRGGNIGVFIGNSNLDSQQFLLFDTYSINER	Beta-ketoacyl_synthase,_N-terminal_domain|PF00109.24	XP_001898484.1	129.8	120
TRINITY_DN13418_c0_g1_i1	type:internal	384	CCAAATGCTGCTCCTAAAAAGGGAGAAGATTGGGAGGACATCATGAAAGACGTTGAAAGATATATTATGCCTGGGGTTACTCATTGGCAACATCCGAGATTTCATGCTTACTTTCCAGCAGGAAACGCTTATCCATCGATTCTTGCCGACATGTTATCCGATGCTATTGGCTGTGTAGGATTTTCTTGGGCTGCAAGTCCAGCATGTACAGAATTAGAAACAATTATGCTCGATTGGCTAGGGAAAATGATCGGCCTGCCTGAGGATTTCCTATGCCTGTCAGATAAAAGCAAAGGAGGTGGAGTAATTCAGGGATCGGCAAGTGATTGCATTTTGGTAAATTTGCTTGCGGCCCGTCATTCTGCTGTAAAGGCACTGAAACAA	PNAAPKKGEDWEDIMKDVERYIMPGVTHWQHPRFHAYFPAGNAYPSILADMLSDAIGCVGFSWAASPACTELETIMLDWLGKMIGLPEDFLCLSDKSKGGGVIQGSASDCILVNLLAARHSAVKALKQ	Pyridoxal-dependent_decarboxylase_conserved_domain|PF00282.17	XP_001656857.1	205.3	142
TRINITY_DN13423_c0_g1_i1	type:internal	372	CAGCGATATGATCATTTTGCTGTTCTTTGTGAACTTTTACCAGTTGCAATTCCATCTCTAGCTGTTAATTTGTTATATCTTGACAGACAAATTGTTGACAATACCTTATTTCAGAAAGCTAGGGACATTTTGATGTGTGACGCAAGATTAACTCTTTATACTAATTATAGCACTGAGGAAGCTTTATGTAATTATCCTGGAAGTAATGTTTTTAAAGGTGCTCAAAGGCTTTCTCACTTAAATTACATGCTTCAAAAGTTTTTGTCTAACAGTCATTTTGTTGGTTGGATGAGTGAATATAATGTCCAGATGCTCTTCTCTAGTCCTGCTCATGTTGAACTTGGTACTCAAAACTTGGAAGCTCTTTCAACA	QRYDHFAVLCELLPVAIPSLAVNLLYLDRQIVDNTLFQKARDILMCDARLTLYTNYSTEEALCNYPGSNVFKGAQRLSHLNYMLQKFLSNSHFVGWMSEYNVQMLFSSPAHVELGTQNLEALST	NA	NA	NA	174
TRINITY_DN13435_c0_g1_i1	type:internal	522	GCTGAAGGAGCTTTCAGAATGTATAGAGCTAAGGCTTTAAGACATCTTTTCCTGTTTGATAAAATGCTATTGATTGCAAAGAAAAAAGAAGAGGGTATACTGAGCTACAAAACACATATCATGTGCTCAAATCTCATGTTGATTGAAAGCATTCAAGGAGAACCCCTTTGTTTCCATGTTATACCTTTTGATAATCCACGATTTCAATATACATTCCAAGCCCGTAATGTTGAACAAAAGCGCGAATGGTGTCTTCAACTGAAAAGAGTGATTTTGGAGAATTATAATGCTGTAATACCATCTCATGCTCGTCAACTTGTAATGGAATTGGGTCAGAGTAAGCAAGAAGACTCTGCTTTAGAAAAGAGCACTACAAAAAGACAGCTATCTGCACCTGAA…	AEGAFRMYRAKALRHLFLFDKMLLIAKKKEEGILSYKTHIMCSNLMLIESIQGEPLCFHVIPFDNPRFQYTFQARNVEQKREWCLQLKRVILENYNAVIPSHARQLVMELGQSKQEDSALEKSTTKRQLSAPEYLEKRKQERRKSELNLNRTLKLKKVLKKSDSSLSKNNHSNS	PH_domain|PF00169.27	NP_001192850.1	119	296
TRINITY_DN13447_c0_g1_i1	type:5prime_partial	420	GATCTCTGTTCCGAGATGGCCGGGCAGTCAGACAAGGATGTGAAGTACTACACCCTGGAAGAGATTCAGAAGCACAAAGACAGCAAGAGCACCTGGGTGATCCTGCATCATAAGGTGTACGATCTGACCAAGTTTCTCGAAGAGCATCCTGGTGGAGAAGAAGTCCTAAGAGAGCAAGCTGGGGGTGATGCTACCGAGAATTTTGAGGACGTCGGGCACTCTACGGATGCACGAGAACTGTCCAAAACATACATCATCGGGGAACTCCATCCAGATGACAGATCAAAGATAGCCAAGCCTTCGGATACTCTTATCACTACTGTGGAGTCTAATTCCAGTTGGTGGACCAACTGGGTGATCCCAGCCATCTCAGCCCTGGCTGTAGCTCTGATGTATCGC…	DLCSEMAGQSDKDVKYYTLEEIQKHKDSKSTWVILHHKVYDLTKFLEEHPGGEEVLREQAGGDATENFEDVGHSTDARELSKTYIIGELHPDDRSKIAKPSDTLITTVESNSSWWTNWVIPAISALAVALMYRLYMAED*	Cytochrome_b5-like_Heme/Steroid_binding_domain|PF00173.26	NP_001253202.1	251.1	196
TRINITY_DN13455_c0_g1_i1	type:complete	303	ATGTTTGCTTTCTACCGGGAAAACTGCAGCCAAGACCATTTGGATTCTTTGACAAACTTTCAACCACGAGGCTTTGGGAAAATCACAGGTCTACAAATGGTTTTCCCATTCAAATCTGGCATCATGTCAACTGAAGACATGCCATGCCCAGGGCCTCCTTCGACAGGAAGAAATGACAAAAACATTGCCAAAAAAAAATGTGCAATTGATGAAGATTGCCGAAAAAACATTGACCAAATTTTTCAGGAAATGAATGTGTCATCGAGCACATTCACGACAATGCTCCAGCCCACAGTCCTTTGA	MFAFYRENCSQDHLDSLTNFQPRGFGKITGLQMVFPFKSGIMSTEDMPCPGPPSTGRNDKNIAKKKCAIDEDCRKNIDQIFQEMNVSSSTFTTMLQPTVL*	NA	NA	NA	259
TRINITY_DN13474_c0_g1_i1	type:internal	420	TGCTCTTCCGATCTTTTACTCACAAAAAAATCTAGTCAGATATCCACTTCTCCAGAAGAGCATATATATGATACAGTTGAGAAACCAGAACAATCTACTTCTGGCCTAACCCATTCTAGAGATATTACAAAACAAGTTACCACAAAAACGGTAGATTTAAAGCAAAAAGAAGATCCTTCAAGCATGAAGAAGCTTTTTGATTCATTTCGTCATAAAGATACTCCATCCAAACCAAAAGCTGCAAAGGAAACCGAGAAGGATGGAAAAGATTATGAAAAAGTTGACATATCTTCCAATGTTCCTAAAGTATCTGAATCTTCTAAAATAATGAAGGATAAAAAAGTAGAACCTGTTTCTAAAGTTATCAAAAAAGAATCACAGATTGCTCAAAATGTGGAG…	CSSDLLLTKKSSQISTSPEEHIYDTVEKPEQSTSGLTHSRDITKQVTTKTVDLKQKEDPSSMKKLFDSFRHKDTPSKPKAAKETEKDGKDYEKVDISSNVPKVSESSKIMKDKKVEPVSKVIKKESQIAQNVEAQTQKNV	NA	NA	NA	159
TRINITY_DN13481_c0_g2_i1	type:internal	324	GCCCAGCGTGAAGGGGCCAAGTATGTGTCTCACGGCGCCACGGGAAAGGGGAATGACCAGGTCCGCTTTGAGCTCACCTGCTATTCACTGGCACCCCAGATTAAGGTCATCGCTCCCTGGAGGATGCCTGAGTTTTACAACCGGTTCAAGGGCCGAAATGATCTGATGGAGTATGCAAAGCAACACGGAATCCCCATCCCTGTCACCCCCAAGAGCCCCTGGAGTATGGATGAAAACCTCATGCACATCAGCTATGAGGCTGGGATCCTGGAAAACCCCAAGAATCAAGCACCTCCGGGTCTCTACACAAAAACTCAGGACCCA	AQREGAKYVSHGATGKGNDQVRFELTCYSLAPQIKVIAPWRMPEFYNRFKGRNDLMEYAKQHGIPIPVTPKSPWSMDENLMHISYEAGILENPKNQAPPGLYTKTQDP	Arginosuccinate_synthase|PF00764.17	EAW87933.1	229.6	78
TRINITY_DN13495_c0_g1_i1	type:3prime_partial	315	ATGACAAAACTCAGACGACAATTTAAAGAACTGTTAAAGGATAGTGGGATATTACCAGAAGACTTTATTCATACAAGCAGCCAACAGCGTTCAAGTCGACATGGTGAACTTTCTCATTTGCGGGATATGAAAAGACAGTTTCATCAAGCTCCTCGAAAACGTAAAGTTTTGAGACTGGAATCTGAACATTTTTATAATGAAGATGAGGATAGTGATGATGGAAGAGTTGACATTCAGGATATAGATTTTTGGATATCTAATAACAGTTGGCAAGTCCAGTTGTTATCATCAAGAAGCCAAGTGTCATCTTATCGA	MTKLRRQFKELLKDSGILPEDFIHTSSQQRSSRHGELSHLRDMKRQFHQAPRKRKVLRLESEHFYNEDEDSDDGRVDIQDIDFWISNNSWQVQLLSSRSQVSSYR	FF_domain|PF01846.17	XP_001658842.1	80.9	42
TRINITY_DN13511_c0_g1_i1	type:3prime_partial	411	ATGGGTCGCAAGGGTCCTAGACTCATTCGTTTTTTTGAAGAAGGTTTGATATTTCAAAAATACAGAAATTTGAGTTATGAAGATACTTCTAAGTTAATGTTTAGCATATATTTTCCTCACAAGACAAAACTATTATCTCCAGCCGATGAACAAATCTTCAAGGATTGGTATGCTTTAAATGGGAAAAAATACACATCGAAGAAGGATTATACTGATGCCAGACAAGCTATGTCATCATCATTAAGAAAATCTGATTATGTTGAAAAAGTGCTTGTCAGTGGTAATAAGTTAGTTTACAGAATACTGAATGAAGTAGAAGTGAAAGAAAAAAAGGAAAAAAAAGATATACTGAAAAGATTGAAGAAAGAAGAATCAGATTATGTCAGTGACCTGTCGTCT…	MGRKGPRLIRFFEEGLIFQKYRNLSYEDTSKLMFSIYFPHKTKLLSPADEQIFKDWYALNGKKYTSKKDYTDARQAMSSSLRKSDYVEKVLVSGNKLVYRILNEVEVKEKKEKKDILKRLKKEESDYVSDLSSVDSP	Nineteen_complex-related_protein_2|PF15458.4;Tetratricopeptide_repeat|PF07720.10;DNA_gyrase/topoisomerase_IV,_subunit_A|PF00521.18;Interferon_regulatory_factor_transcription_factor|PF00605.15	NA	NA	200
TRINITY_DN13529_c0_g1_i1	type:internal	351	CGATCTCAAAAATACAATATGGTAACAGTCCTCAACGGGGGCTCTACTTCATATGTACTTACTGATCTTAAGAAATTCACCAAGTATGAATTTTTCTTAGTTCCTTTTTACAAGAATGTGGAAGGACCTCCAAGCAATTCAAAAATCGCCCAGACAATAGAAGATGTTCCATCAGCTCCTCCAGATAATCTTCAGGTTCGAGTTATAGGACCCCAAATGGCAACTATCTCATGGTCTCCTCCTCCTCCACAACACAGAAATGGATTATTGCAAGGTTATTCTATAAGAATATTAGACAATTCTTCTCAACTCCATGCTCAGATAACAACTAATGCAACAACAACATCTGTC	RSQKYNMVTVLNGGSTSYVLTDLKKFTKYEFFLVPFYKNVEGPPSNSKIAQTIEDVPSAPPDNLQVRVIGPQMATISWSPPPPQHRNGLLQGYSIRILDNSSQLHAQITTNATTTSV	Fibronectin_type_III_domain|PF00041.19	ABJ17045.1	129.4	178
TRINITY_DN13533_c0_g1_i1	type:5prime_partial	879	GATAATGAACGTCCAGCTGATTACGTCTATATTCGGGATACATCAAGCCAAGCAAATATCTTGGCTGTATGTGAAATGGAAGTTTACGTGAAAGACGATGCATGGTGCAAGAATTCACCGGAACTGTTTATACCCAACGGTCGCTTAGAAGTGAGTAGAAATAAAGCGACGCTTCGGTGTTTAGAAGGTTTCAAAGCAAGAGACAACACGCGTGTTGTTTGCGAGAAAAATTCCTGGAGTGGACCAAACTTGCAATGTGAAGAGATTCTTTGTGATGCAATTGTTGGCAACGAAACTCTTGTTGGTGGAGAATGGCTAATTGAAGGCAATGCCAGGAAACTTTCTGTGGGAATCAAAAGAAAGCTGGTCTGTAGATCAGATTACCACATTGAAGGAAAG…	DNERPADYVYIRDTSSQANILAVCEMEVYVKDDAWCKNSPELFIPNGRLEVSRNKATLRCLEGFKARDNTRVVCEKNSWSGPNLQCEEILCDAIVGNETLVGGEWLIEGNARKLSVGIKRKLVCRSDYHIEGKPQIVTCFKNGTWSRTSATCVENKSDKQDRLRIIAVAVGAVVILVVIILLGLTIYLIQKKRAREVVVIYKPGEDGYAPSSVTNTTGCSDSEYSTVYYDAMHNAPYPPTSTRPRPSPNLERGYSKPVDDRGSPSTTLVPKKLPADIAFGSLKSSALYNSMK*	Syndecan_domain|PF01034.18;TMEM154_protein_family|PF15102.4;IncA_protein|PF04156.12;Predicted_membrane_protein_(DUF2207)|PF09972.7;Lysosome-associated_membrane_glycoprotein_(Lamp)|PF01299.15;Protein_of_unknown_function_(DUF515)|PF04415.10;Sushi_repeat_(SCR_repeat)|PF00084.18;Sigma_factor_regulator_N-terminal|PF13800.4;Domain_of_unknown_function_(DUF3377)|PF11857.6	NA	NA	677
TRINITY_DN13559_c0_g1_i1	type:3prime_partial	321	ATGGCCGTTCATATATCATCACTTCCTGAAGAGATTCTGATACAAATATTTGAATTCCTAACTGTTCGCCAGAGATTGGTCGTCTCTCTGGTATGCAAGAAATGGTTGCATGCCATGGAATGCCATAAGCTCCTGGGTGATATCGAAATTAAATTTTCAAAAGAAATCGAAAAGCCTGTCGCATTATTTTCCCCCGCCACTAGAAGATTTAAATGTTTTTCTTTTGATGAAGTCACTATTGATGAACCTGTTGTAGAATTCTTGAAGCAATACAGCAAACAGTTAACCAAACTGACTTTTAAAAATTGTGAAGTTTGTCCG	MAVHISSLPEEILIQIFEFLTVRQRLVVSLVCKKWLHAMECHKLLGDIEIKFSKEIEKPVALFSPATRRFKCFSFDEVTIDEPVVEFLKQYSKQLTKLTFKNCEVCP	F-box_domain|PF00646.31;F-box-like|PF12937.5	NA	NA	65
TRINITY_DN13570_c0_g1_i1	type:3prime_partial	453	ATGGCCGAAAATGGGTTCTGGCCCAGCACTTTATTTGGTATTCGAAAGTCTTGGGATTCCAAAGCTGTAAATGACTTACCGGATACTTATGGTCAAGAATGGACTTACGCCCACAGAAAGAAATTGGAATACACTTGTCATACTGCATTTTTCGTTTCCATCGTCATTGTCCAGTGGGCCGATCTGATTATTTGTAAAACGAGGAGGAATTCTCTCATACATCAAGGAATGTCAAATCATGTCTTAAATTTTGGACTCTGCTTCGAAACTGCCCTTGCAGCCTTCCTTTCATACTGCCCGGGTATGGATCGTGGTCTTAGGATGTATCCTCTGAAGTTTCAGTGGTGGCTGATTGCCCTGCCTTTCTCTCTACTCATATTCATCTATGACGAAATTAGA…	MAENGFWPSTLFGIRKSWDSKAVNDLPDTYGQEWTYAHRKKLEYTCHTAFFVSIVIVQWADLIICKTRRNSLIHQGMSNHVLNFGLCFETALAAFLSYCPGMDRGLRMYPLKFQWWLIALPFSLLIFIYDEIRRYILRHRPPGSWIEKETY	Cation_transporting_ATPase,_C-terminus|PF00689.19	AAN17736.1	259.2	214
TRINITY_DN13591_c0_g1_i1	type:internal	387	TGTAAAATGTGCTATAAAAAAGCATTGAAGGTGCAAAAAGATGCTTGTAACAACATTTTAAAGGACATAGCTTCCAAAGACTTTGTATCTATAGAAAATTATTTATTCTTAGTTGAACATGAGCCTGTTTATACTGTAGGAATCCGAAATAAACAATACTTTAAAGATGAGGATAAATTTAAAAAATTGGGAGCCGATTTTGTTGTGACTGATCGTGGTGGCTTGATAACGTTTCACGGACCTGGGCAACTAGTATCATATCCAGTACTTTATTTAGGACATTTTGACGCTAAAAAGAGCATTAAGTGGTATGTAAGGCAATTAGAAAATACTCTAATCGATACTTGCAAGAGCTTCAACGTGAACGCTACAACCACGAGTGATGTA	CKMCYKKALKVQKDACNNILKDIASKDFVSIENYLFLVEHEPVYTVGIRNKQYFKDEDKFKKLGADFVVTDRGGLITFHGPGQLVSYPVLYLGHFDAKKSIKWYVRQLENTLIDTCKSFNVNATTTSDV	Biotin/lipoate_A/B_protein_ligase_family|PF03099.17	XP_793736.2	115.9	169
TRINITY_DN13602_c0_g2_i1	type:internal	582	TTATACTGTGGGACAGCTTCAGGTGATATTCTTAAACTTCAAATTATATTAAATGTTAATGAACACAGTGCGTACGACGCAAAACTGCTGAGTTGCTTAACAAGAGTGATAAGAAAAGAAATTCCGGGGGATATACCGCTCTATAGTGGTGGTGTTACTGCAATAGCAGTTTTAAAAACAGGTGAGCTCTTAATTGGAACTGGAGATGGGGTTGTATGTCGTGCCACAGAAGTTGAATTTCAAGCCAAAGATTCTTCTAATAAGTCCTCCGGAAATAAAAGCAAATTAAAAATGGAAACCAAGTTAAAAGAATTACAAAAAACTATTATTAAAGGGGATGTTACATCAATTGCTCTGCGAGGTGATGGTCATCAGTTTCTTGTTGGTTCTGGAAAATCA…	LYCGTASGDILKLQIILNVNEHSAYDAKLLSCLTRVIRKEIPGDIPLYSGGVTAIAVLKTGELLIGTGDGVVCRATEVEFQAKDSSNKSSGNKSKLKMETKLKELQKTIIKGDVTSIALRGDGHQFLVGSGKSEIYQVTLTGFQNEPIYTCHGSAVNDIAFPYKCSDLFATCSKETIRVWNVATSQELLRIEVP	Nucleoporin_Nup120/160|PF11715.6;WD_domain,_G-beta_repeat|PF00400.30	NP_001106545.1	37.4	155
TRINITY_DN13629_c0_g1_i1	type:internal	648	AAGCATCTAAATGCTCCAAATTTTGTCAGCTCTGTCCACCATGATGAGTTTGTATATTTCTTTTTCCGGGAAACTGCTGTTGAGTATATCAATTGTGGAAAGACAGTGTACTCTAGAGTTGCTAGAGTTTGCACAAAAGATAAAGGGGGTCCTCATAAGTTTCGAAATCGTTGGACTTCTTTCTTGAAAGCAAGGTTAAATTGTTCCATACCTGGAGAGTTCCCATTTTACTTTAATGAAATTCAATCAACAACAAATGTTGTTACTGGAAAATATGGTGCTAAAGAGGCTCAGCTGATTTATGCTGTTTTTACCACACCTCCAAACAGTATCAGTGGCTCAGCAGTGTGTGCCTTCAGTTTAGAAGATATATTTCATGCATTCAATGGTCCTTTCAAA…	KHLNAPNFVSSVHHDEFVYFFFRETAVEYINCGKTVYSRVARVCTKDKGGPHKFRNRWTSFLKARLNCSIPGEFPFYFNEIQSTTNVVTGKYGAKEAQLIYAVFTTPPNSISGSAVCAFSLEDIFHAFNGPFKGQDDINANWLPVASTKVPEPRPGQCVNDSRTLPEVTVNFIEGNSLMDRAVPSFWNHPVVLHTVFQYRFTQITVDPQIETADEK	Sema_domain|PF01403.17	XP_001663071.1	291.2	193
TRINITY_DN13630_c0_g1_i1	type:3prime_partial	684	ATGGCAAACGGACCCGAATCTTGGGAACTTTACAAAAGTTGGAAAAAAATTGACAACTCTTCGACTTCGATTCCTCGCTTTTATCACAAGGTTCCATTTGAAGAAGGTAGCACGAGGCAAAAACTCAGAGAGGAAGCCAGAGCTGTTTTTATAGAAAGAAAAAATAAGGAGTTGCTAGATAATGAAGATTTAAAGGAGTTATGGATGCTGCTTGAAAAAAATCTCTCTAAACCTTTGACTAGTGATGATCATATGATTAATTATACTGATTTTGCGAAAGTTTCAAATAAATGTGATGAAAAGTTCCAGCCTTACTTTTCTGCTAGAATTTTTTTGAAGCTAATGCAGAATGATAAACATGGGCGCATTTCTATTCGGCACTTTTTTAATTATGTCATG…	MANGPESWELYKSWKKIDNSSTSIPRFYHKVPFEEGSTRQKLREEARAVFIERKNKELLDNEDLKELWMLLEKNLSKPLTSDDHMINYTDFAKVSNKCDEKFQPYFSARIFLKLMQNDKHGRISIRHFFNYVMRKVWLHQTRIGLSFYDLAGQGYLREIELENYILELIPTLPQLDGLEASFHSFYVCTAVRKFFFFLDPFRTNKIKIRDILACSFLDDLLELRDETL	NA	NP_001083289.1	310.1	142
TRINITY_DN13636_c0_g1_i1	type:5prime_partial	597	CTGATTAACTTTTCCCAATTAAATTTCTGTTGTGTGTCATATATTTGGATTGAAAAGATGCGTTATTTTATAAATGATAGTATTCCTTATATTTATCTGTGTCATAAAACATTTGAGCTAAGAAATACATTAGAAATAAGTCCTCAAATGCAAGAAGAGAAGAAACCTCATGTGTGTCGCCTATGCCGTAAAATTTTTCCTAATAAGAATAGATTGAATAGACATTTGCTTATTCATTCAAGTAAAAATTCGTATACTTGTAATACGTGTAACAAAACTTTTTCTCAGAAAAACAAATTAAGTAGACATTTACTTACTCATTTGAATAGAAAGCCATATGTGTGTGATTTATGCAGTATGACATTTGCGGATAAAAGTAATTTAAAGAAGCATTTGCTG…	LINFSQLNFCCVSYIWIEKMRYFINDSIPYIYLCHKTFELRNTLEISPQMQEEKKPHVCRLCRKIFPNKNRLNRHLLIHSSKNSYTCNTCNKTFSQKNKLSRHLLTHLNRKPYVCDLCSMTFADKSNLKKHLLRHNKEKPQVCNLCKKGFSRKLDFMLHYVSHKDLKPHLCTICSKAFSHKCNLNRHLLTHNDKNPYV*	Double_zinc_ribbon|PF12773.5;Zinc-finger_double_domain|PF13465.4;C2H2-type_zinc-finger_domain|PF13909.4;Hydrogenase/urease_nickel_incorporation,_metallochaperone,_hypA|PF01155.17;C2H2-type_zinc_finger|PF13894.4;zinc-finger_C2H2-type|PF16622.3;Zinc_knuckle|PF13696.4;C2H2_type_zinc-finger_(2_copies)|PF12756.5;C2H2_type_zinc-finger_(1_copy)|PF16293.3;Trm112p-like_protein|PF03966.14;BolA-like_protein…	EAW59336.1	159.1	344
TRINITY_DN13637_c0_g1_i1	type:5prime_partial	456	CTGAAATGCGGTTCTTTAGGGGATAGAGACTGGAGGGGTCACACTTGGCCTGAAAATGAGGAAGAACTAAATAAAGCATGCAGCAATGTGGAGCCAATTCTAGACTGCCAAATTGATTTTGTGCAGAGGTGCCCAAAATCAGACCTTTCACTTTTTGCGGGTTACTTGAAAGAATCTAAAATTCTTTACGGAAAGTTATGCAAGGAATCAACTTTCCGAACTAAATTTTTGAAAAATGTCCCATGCTTAAACCATGAATCTGTGGATTTTAATATATGCCGTAATAAATTCACTGTAGAAGGATCAGGAGGATTCTGCGCGTATAATTTTGATGTTCTTCAATGTGCTTTAAACATGATCAAAGAAAAGTGCGGTGAGGAAGCTTTGCATATCTTCGAT…	LKCGSLGDRDWRGHTWPENEEELNKACSNVEPILDCQIDFVQRCPKSDLSLFAGYLKESKILYGKLCKESTFRTKFLKNVPCLNHESVDFNICRNKFTVEGSGGFCAYNFDVLQCALNMIKEKCGEEALHIFDALYKPLISIDKIFCRKDD*	NA	NA	NA	570
TRINITY_DN13697_c0_g1_i1	type:internal	516	TTCACTCGTGACACAATTATGTATCACCATGATTTTATTGCAATGTATTTGAAAGAGATTCAAGTGCTATCAAAACCATTTAGAAAATTTTTTTTCTCAAATTCCACTTCTACACCAATCCTTCCTGCTTATTTGAATTTTCCTTCAAATGCCTCTATATGTTCTGCTTTTCCATCTACGTATTCTAATCCTGTTGTAAAACCACCTCTTTCTGCCCAGTTAAATTTGAGTACAATTTGTTCTCATTTCAATCTTGCTTCAAAACCATCTACTTCTAACAATTCCTATGCTGTCTCCAAGCCATCTGCTTTTAATAATTCATTTGCTGCTCCCAAGGTATCTACTTCAAATCATTCGTATGTTGCCTCCAAGCCACCTGTTTCAAATCATTTGTGTTCT…	FTRDTIMYHHDFIAMYLKEIQVLSKPFRKFFFSNSTSTPILPAYLNFPSNASICSAFPSTYSNPVVKPPLSAQLNLSTICSHFNLASKPSTSNNSYAVSKPSAFNNSFAAPKVSTSNHSYVASKPPVSNHLCSASKPSTSVNSNTGSKSSSSTNSNAGSKSSTSANSNAGSK	NA	NA	NA	418
TRINITY_DN13699_c0_g2_i1	type:internal	318	TCGCAACACTATACAAACAACGGAAATATTTTTGGGGAATTGCCTACAAGTTCGAAATTTTCTTACATTTATATCTTCAATGGAGAAAATATCGCATATTCGACTTGCTTGATGGTCAACGTCCGTGGGCCCCGGCGCATGCCATTGGCAGGTACGACGCTGGTTAAGAGTACACTAGCTGCATGGCTCGGCGTTGCACGGGCTATCTCTACTATAAATTTTCCCTTCCCAAAATCAGCACTTTCAATCTTCTTTTTAGAAATTATTTTGACTTTTCTTTCCCCTCCGCTTAGCCAACACCTCCTAGATACAAGAGAT	SQHYTNNGNIFGELPTSSKFSYIYIFNGENIAYSTCLMVNVRGPRRMPLAGTTLVKSTLAAWLGVARAISTINFPFPKSALSIFFLEIILTFLSPPLSQHLLDTRD	NA	NA	NA	518
TRINITY_DN1370_c0_g1_i1	type:5prime_partial	390	GACGAAACAACAGCCAAAAAATCCATTGTAGAATTTGTTAAACAAAAACTACCTCCGACGAAGCTACAGGTAAAAGAAAGAGGTATTTATGATTTGGACACAATTCCAATAAAGAAGGAAGGAGATTCGTACGCTTGGCAGGCCAACTTGGACGTTCTGGAAGACATGCTAATGACGGATAAAGTAAATCAACAATTATCAGGTGTTTATTCTGGTGAAGCTTTATTCTTGTACGGAAAGGATTCTTTCTTCGACGTGGTGAATGATGAAGATATCCACAAATATTTTCCTCGGGCAACCAAAGTAGGAATTGAAGGTGCTGGTCATCTGATACATCAAGATTTCCCCAATGAATTTCTACAACATATCACAAACTTTATCTTGAAATAA	DETTAKKSIVEFVKQKLPPTKLQVKERGIYDLDTIPIKKEGDSYAWQANLDVLEDMLMTDKVNQQLSGVYSGEALFLYGKDSFFDVVNDEDIHKYFPRATKVGIEGAGHLIHQDFPNEFLQHITNFILK*	Alpha/beta_hydrolase_family|PF12697.5	NA	NA	296
TRINITY_DN13714_c0_g2_i1	type:internal	336	TGTGCTCTTCCGATCCGAGGATTTCCTTTTCGTAGTAAATTAAATATGCATTTACTTACACACACAAATGAAAAGTCTTTTAGTTGTGAAATTTGCAAAAAGGCATTCTCTCGTAATCATACTTTGAAAAATCATTTGCTCATACACTCTAAGAAAAAAACTTTTATTTGTGAAATCTGTAATAAAGCATTCTCTCGAAGGGAAGATTTGAGAAAACATTTGCGTATTCATTCTCAAGAAAAACCTTATGTTTGTAGTATCTGCAAAAAATCTTTCTCTGTTAGTAGTTCATTACGAATACATTTGCGTGTTCATACCTCTGAAAAGCCAGATCGG	CALPIRGFPFRSKLNMHLLTHTNEKSFSCEICKKAFSRNHTLKNHLLIHSKKKTFICEICNKAFSRREDLRKHLRIHSQEKPYVCSICKKSFSVSSSLRIHLRVHTSEKPDR	Domain_of_unknown_function_(DUF3449)|PF11931.6;Prokaryotic_RING_finger_family_1|PF14446.4;GAG-pre-integrase_domain|PF13976.4;Zinc-finger_double_domain|PF13465.4;PHD-finger|PF00628.27;Protein_of_unknown_function_(DUF629)|PF04780.10;C1_domain|PF03107.14;KIAA1045_RING_finger|PF16744.3;C2H2-type_zinc_finger|PF13894.4;zinc-finger_C2H2-type|PF16622.3;DBF_zinc_finger|PF07535.10;Ring_finger_domain|PF1363…	XP_001893100.1	122.5	230
TRINITY_DN13734_c0_g2_i1	type:internal	324	GGTGATATGATCTTGGCTGTGAATAAAACAAAATTAATTGGTGCTGATTATGATCTAGCTGCTTCTGTTTTAAAGAATGAAGATGGACCAATGACCTTTTTGGTAGTAAATTCCCAAAAACCTACCTCAAGTCCTGTGCACAATGATATAGGTCATGATAAGAAACCTAGAAACAGCTTAGGACTTTTACCTGAAAATGATACTCGACGAAAAAGTTCTACTCCTTCATCTCTGTGTCCAACTCCTTCACCCAATAGTTCATCTCCATCTCCAAACCTCCCAGCATGTCCTATTCCTCCACCAGTGGAGTTCTCTGATCCTTGC	GDMILAVNKTKLIGADYDLAASVLKNEDGPMTFLVVNSQKPTSSPVHNDIGHDKKPRNSLGLLPENDTRRKSSTPSSLCPTPSPNSSSPSPNLPACPIPPPVEFSDPC	NA	NA	NA	72
TRINITY_DN1375_c0_g1_i1	type:internal	390	CTTTATCGTTGTGAATTTGGAGGTTGCAGTAATGCAATAACGCTTAGTGATGAAGATATGGGGGATAGTTCGCCTTCTCCTTCAGACGAAACTTCAAGTGTGTGTGCTGGATGTCTGAATATCATTGACGATGATGAATTTTTGGAAGCTTTAAGCAAGGAGTGGCATATTGACTGCTTCAGATGTTCTGTTTGTGATATTCTTCTTTCCAACTGGTATTTTGAGAAAGATGGTTTGTTGTTCTGCAAAGATGACTACTGTACAAATTATGGAGAGTCCTGCCAAGATTGTAATGCTATCATTACAGGCCCAGTTATGGTTGCTGGCGACCATAAATTTCATCCTGAATGCTTCAAATGTACAAACTGTGGTGGATTTATTGGGGATGGA	LYRCEFGGCSNAITLSDEDMGDSSPSPSDETSSVCAGCLNIIDDDEFLEALSKEWHIDCFRCSVCDILLSNWYFEKDGLLFCKDDYCTNYGESCQDCNAIITGPVMVAGDHKFHPECFKCTNCGGFIGDG	LIM_domain|PF00412.20;TNFR/NGFR_cysteine-rich_region|PF00020.16	XP_001658917.1	154.8	311
TRINITY_DN13814_c0_g1_i1	type:5prime_partial	576	GCCTTGTTTCCAGGCCTTCAACTGAGCTTGGATAATAAAGACATCTCAGTGAATTCATTAGCTTTAATTAATCCCACTGGTCTAGAAATTCCAAGACTTCTGCAGCCAGTTTGGTTAACTAAACCTTTAACTAGACTTTCTGAGTTCCCAATGGGATATCAACTAACGAAAATGGTCGGACAACGTCTCGCCAAGAAACCCGAGTTGAAAGGTGGAACTTTCGAAGAGCATTTCCTTTCGGCATTTACTCTACTTCATTCAAATATTCCAAAGAAAGGTGCTTTATTTCAAACTCTTCTGGACCAGAACTTTCCTGTCTTCATGGCCTTTAGTCAGAATGATAAATTAATCTCTAGAAAGACTTCTTACAAAATGGCTGACATGATGGTGCTTTCAAAA…	ALFPGLQLSLDNKDISVNSLALINPTGLEIPRLLQPVWLTKPLTRLSEFPMGYQLTKMVGQRLAKKPELKGGTFEEHFLSAFTLLHSNIPKKGALFQTLLDQNFPVFMAFSQNDKLISRKTSYKMADMMVLSKDIVTYDKDGKPNGSGGVNPFRKVMAFEKGSHFLTRTYPDIVSEAVSSFLFQQFENRVK*	Alpha/beta_hydrolase_of_unknown_function_(DUF1057)|PF06342.10	NA	NA	355
TRINITY_DN13815_c0_g1_i1	type:internal	603	GCAAGTGAAATGTTGGTGAATATGGCAGGAACTCTAGATGAATTCTATCCCCAAATTGCTATTGTCACTCTTATGAAGATAATCAGGGAACCATTGCTTCACCAGCATCATTCAATGGCAGTCCATGCAATTACTTTCCTCTTCAAAAGTATGGGAGTTAGTGCTGTGCCTTATCTGCAACAAGTGATGCCTTCTTTTATCAATGTTATGAAGACTGCAGATGGAACTTTTCGAGAATTTCTTTTCCAACAATTATGTCAGATCATAAGTATTGTTAAACTACACATAAGAAACTATTTGGATGATATTTTTAGCCTCCTTAAGGAATTCTGGACACCTCAGAGTCAAATGCAAGGTACCATTATTCTATTAATTGAACAAGTAGTGATTGCTCTTGGG…	ASEMLVNMAGTLDEFYPQIAIVTLMKIIREPLLHQHHSMAVHAITFLFKSMGVSAVPYLQQVMPSFINVMKTADGTFREFLFQQLCQIISIVKLHIRNYLDDIFSLLKEFWTPQSQMQGTIILLIEQVVIALGAEFKIYLPQLIPHFLRVFMHDTGKDRIITTKLLIALQKFGNNLDDYLHLILPPIVKLFDSSDVPISVQ	Vacuolar_14_Fab1-binding_region|PF12755.5;CLASP_N_terminal|PF12348.6;UME_(NUC010)_domain|PF08064.11;Domain_of_unknown_function_(DUF3385)|PF11865.6;Tti2_family|PF10521.7;Apoptosis_inhibitory_protein_5_(API5)|PF05918.9	BAF44666.1	271.9	194
TRINITY_DN1381_c0_g1_i1	type:internal	300	AAAATACTTGAAGATATGTCTACTAAAGAAGTAAAGTATTATAAGCTTCTGAACAAAACTAAAAACTTACCACTTGTTATGGATTCAGGGATGCTTCCTTCCAAGGATGAAATAGATGAAATTTTTCCTAAAAGCCCAATTTCTACCAGTGTTGATTTACAGTATAGTGGGTTAAAGAATGAAGCTGTTGAAACTCCTTGCTCTTCAAGTATTGAATGTACAAATTTAGAAAGTGTTAACAGTGCTCCATATGAGAATGATGTTCTTGGAATGGAAGACACCTTGAAAGATTTATCTGAA	KILEDMSTKEVKYYKLLNKTKNLPLVMDSGMLPSKDEIDEIFPKSPISTSVDLQYSGLKNEAVETPCSSSIECTNLESVNSAPYENDVLGMEDTLKDLSE	NA	NA	NA	152
TRINITY_DN13820_c0_g1_i1	type:internal	309	TTACGTTTTGCCATGAAAGTAAACAATGAAGTGCTGGAAGACAAACTCATGAAAAAGTGGTTTTCTCTTGTAAATGAAAAGAATGCATTGCTTAGGAGACAGATGCAATTGAATATTTTAGAGAAGGAATGCGATCTGGAAAAGCGCTATGAATTCCTCAATGAAGAACTCAGAGCACTTTTAGTTCTTGAAGATTGGCAGAAAACTGAGGCCGACAAAGCGCGTGAAAAACTGCTATTAGAAGAGCTAGTGATCATTGTCAACAAGAGAGATGAACTGGTACGGGAGCTACATACACAAGAACAAGCG	LRFAMKVNNEVLEDKLMKKWFSLVNEKNALLRRQMQLNILEKECDLEKRYEFLNEELRALLVLEDWQKTEADKAREKLLLEELVIIVNKRDELVRELHTQEQA	Protein_of_unknown_function_(DUF3585)|PF12130.6	XP_001374938.1	129.4	126
TRINITY_DN13837_c0_g1_i1	type:internal	510	GAGAAGAAAAGACCCAAGAGAAATCTGTTACCTCCTGGATTCGTTGAAGCCGAAGATTTAAACATTACGAACATTGTTGCTCATGCTCCAACTCCATATCTCAACTTGGCAGTTCGACAAAATGGTCGAGTGCTGGACACAGCTTACAATGTTCAACCTGGAACTCCCTTGGAAATGGTTGTCTACTTGGATTCAAAAAGTGCATCTACCTATGGTATCCTAGTCAGCTACCTTAAAGTCACTGATGGCACTCCCGAGCATGATGAAATCATCGTAATGAATGGATGTTCGATAGATCCCTATATATTTGGTAACTTTGAAACTCCAGACGAAGGGAAGACTTTATACTCAAAATTTAGAGCTTTCAAGTTTCCTGACTCGAACTACGTCCTTTTCGTC…	EKKRPKRNLLPPGFVEAEDLNITNIVAHAPTPYLNLAVRQNGRVLDTAYNVQPGTPLEMVVYLDSKSASTYGILVSYLKVTDGTPEHDEIIVMNGCSIDPYIFGNFETPDEGKTLYSKFRAFKFPDSNYVLFVGTVNICLKQCKGVQCGSDQIGYGRKKREIPAELPYDP	Zona_pellucida-like_domain|PF00100.21;Uncharacterized_protein_conserved_in_bacteria_(DUF2264)|PF10022.7	XP_972591.1	172.2	268
TRINITY_DN13851_c0_g1_i1	type:internal	579	AATGTTGCTGTTCTACCTTTTACATTGCCTTTCTGTGAATTGTCTACAGATAAAGGAAGATTAGAGGAAGAAAATCAGAGATATGCCCTTGCTGAGAAATGCATTGATTCTCTTTTGAAAGAAGGATTTGATCTTGATTCTGAATTGAGCACTATTCAGAAGAAGAGGATGGACATTTTATTAAAAATGTTTGCTTTAGCTACAAGATCTGATCGGGAATATAGAGCATTAGATACTGCAGAATTAATGCCTAATCCTGTAACTGTTCAAGGAGCTATCAAGTATGCTACACAACGTCATCGCATTGCTCTTGCTGAACGATTGGGGGAAGTCATGAATAAGAAACTTTCTAAAGAGGTTGAAGAAGAGGCAGTTGAAGATGATTTTGATTTACCACCT…	NVAVLPFTLPFCELSTDKGRLEEENQRYALAEKCIDSLLKEGFDLDSELSTIQKKRMDILLKMFALATRSDREYRALDTAELMPNPVTVQGAIKYATQRHRIALAERLGEVMNKKLSKEVEEEAVEDDFDLPPYEDMSESLLSRNASTPNLSSYSKEDSVLKPKPLSRMRGHPGRLFENEEPTGDGEEMNTPP	Glutathione_S-transferase_N-terminal_domain|PF17172.2	AAH77491.1	95.1	208
TRINITY_DN13878_c0_g1_i1	type:internal	363	AATATTGATCCATATCATCCAAGTATTCTAAAATACATCGAAGAGACCCCACCACTAGTATGTAAACATCAAGAACCATTAACAAAAACAGAAGGAAATATGTTAATTATAGACAAAGAAGCTGTTAAGAGCTGGAACTTGAATATTTCGGAAATAACTTGCGAGCATATGGAAGTCTCTAGAGTCAATGAAGGTTTTAGTGATAATTACATTGGGTACGGGCCGAAACATTCATTTACTGACGAAGTTAAAATTGAAGCTGAATTCATAAAAGTACTATGCTATGACTTAGAGAGAACAGAAATTTATCAAGAGTACCACAGCTTCATCCACAACAAGCCAAAAGTCGAAAAGCGATGCAAG	NIDPYHPSILKYIEETPPLVCKHQEPLTKTEGNMLIIDKEAVKSWNLNISEITCEHMEVSRVNEGFSDNYIGYGPKHSFTDEVKIEAEFIKVLCYDLERTEIYQEYHSFIHNKPKVEKRCK	Protein_of_unknown_function_(DUF229)|PF02995.15	NA	NA	82
TRINITY_DN13884_c0_g1_i1	type:3prime_partial	321	ATGAGGAATGTGTATTCTCCAATAGATTCAACAATTGGCAGAAAACCAAGGCTAACAATGAAATTAGCCATCCAGTTCACAGATACTGCTATACTAGTTGCTATTGGCCGTGCACCTTGTCCAAAAAGTTCTGCCACCAAAAACCATGGAATAGACCCTGGACCACTAGCAAATAGTATTATAAAACCAATAATGCAAATAACACTGAGGTATGACAGCCAAGCAGCATTTGGAGTCAAAGCCAAAGAAATCGTAAGCAATGCAGTGATAACCATCATTCCTGTCAACCCTGTCAAGTGTAAAGTTTTCAGATCGGAAGAG	MRNVYSPIDSTIGRKPRLTMKLAIQFTDTAILVAIGRAPCPKSSATKNHGIDPGPLANSIIKPIMQITLRYDSQAAFGVKAKEIVSNAVITIIPVNPVKCKVFRSEE	Family_of_unknown_function_(DUF4006)|PF13179.4;TMIE_protein|PF16038.3;Putative_Actinobacterial_Holin-X,_holin_superfamily_III|PF07332.9;Sugar_(and_other)_transporter|PF00083.22	NP_001097467.1	154.8	196
TRINITY_DN13889_c0_g2_i1	type:internal	342	GGCGTTCGGATCGGAAGGTGCCCGGTTCGAATCTTCAACATTGGTGACCAATTGACTGAAGTAAGAAAACGCAACTTTCTGAACTGTCGTGGCGCCATTCTGGTGAAAAAAGAAACTATTCCATCATCTTGGTTCTGGTTTTCCACAAACTCTGACGCATGCGCAGATGTCCATGCTTTACTTCCTCGATCCATTGTGGACTTCTTTTTTTACTCCATTAGATCCGCGTATGCTGTCGATTGCGCAACCGGGAACGGAAACCTGGTGGCGGTTTCCGTCCGCGGCGCTCGCTGCAAAAGGGGAAAAACTTTTTTACGTTCTGCAAGCCCTGTTCCGATGACC	GVRIGRCPVRIFNIGDQLTEVRKRNFLNCRGAILVKKETIPSSWFWFSTNSDACADVHALLPRSIVDFFFYSIRSAYAVDCATGNGNLVAVSVRGARCKRGKTFLRSASPVPMT	NA	NA	NA	2202
TRINITY_DN13909_c0_g2_i1	type:5prime_partial	378	AATGTCTTGAAATCACCTGTCTTCAAGCCCTGTCACAAAACTGTCAGCGCAGTTCCCTATTACAACTCCTGTTACCTGGATGCTGGGGAATGCAGACCCAGAGACAGATGTTATTGCGAATCCTTAACAGCTTACGCTCGACAATGTGCTCGGGCTGGTCTCGAACTAGGAGACTGGAGAAGCGCAACCGGATGTGATGGAATGCGATGCAGAAATGGTCAGCAGTACATGAACTGCGCTCCTGCGTGCCGCCGTACGTGCAAGAAGCCCAAACGTGACAAGTCTTGCAGAAGGCAGTGCCGACCAGGCTGTTATTGCCCGCCTGGTACGGTGTGGCATAGAAAGAGGTGCATACCCCTGGACGAGTGCCCCTCATAA	NVLKSPVFKPCHKTVSAVPYYNSCYLDAGECRPRDRCYCESLTAYARQCARAGLELGDWRSATGCDGMRCRNGQQYMNCAPACRRTCKKPKRDKSCRRQCRPGCYCPPGTVWHRKRCIPLDECPS*	Trypsin_Inhibitor_like_cysteine_rich_domain|PF01826.15;C8_domain|PF08742.9	EAW88816.1	100.9	115
TRINITY_DN13911_c0_g1_i1	type:internal	735	TGCATAGTTAAAAGAACAAGAATTTCAAAGACTAATGTTATTCTCCAATCTAAAACAAAACAATATACATGTGGAATATGTAACAAATCATACAAGACTAAAAGAAATTTTAGTGGTCATTTAATGGCTCATGCCAATTTACAACCTTTTGCTTGTACAAAATGTCCTAAAAAGTTTTCTTTCAGATATTTATTGCATCGGCATTCTTTTTGTCATTTACCTACAAAGCCCCATAAATGTCTACAATGTGCTAAAACATTTAAACTACGGTCTACTTTGATATCTCATCAGTATGCACATAAGAAATTAAGAAACTTTGTGTGTCATATATGTAATAAGTCTTTTATATTTAATTGTAAACTTAAAGAACATCTATTGTCGCATTCATCTGCAAAACCT…	CIVKRTRISKTNVILQSKTKQYTCGICNKSYKTKRNFSGHLMAHANLQPFACTKCPKKFSFRYLLHRHSFCHLPTKPHKCLQCAKTFKLRSTLISHQYAHKKLRNFVCHICNKSFIFNCKLKEHLLSHSSAKPFVCEICYKGFKTKVKLKIHCFVHTKKKSFHCDQCNMQFTTSARLRLHFRRKHEGIKQFICDECGNNYFSFYELKSHQRIHSDEKPFECIWCNKSYRSRAELKVHWRFHTGEK	C2H2-type_zinc_finger|PF13912.4;C2HE_/_C2H2_/_C2HC_zinc-binding_finger|PF16278.3;Zinc-finger_double_domain|PF13465.4;Zinc-finger_double-stranded_RNA-binding|PF12171.6;Vacuolar_protein_sorting_36_NZF-N_zinc-finger_domain|PF16988.3;Zinc_finger,_C2H2_type|PF00096.24;PhnA_Zinc-Ribbon|PF08274.10;Recombination_endonuclease_VII|PF02945.13;Zinc-finger_of_C2H2_type|PF12874.5;Zinc_knuckle|PF13696.4;Zinc-fi…	EAW57250.1	186.8	474
TRINITY_DN13923_c0_g2_i1	type:internal	477	TTTTTTCCGATTCCGGACGATTTTGCGAAAAATATGGAAAACGAGGTGTTGGAGAGACGTCTTTCAAATATCCAAATAACCACAACTGACCAAAAGTACAACCTTCAGAGGAATCGTCAAAAATCAACATATCACGACTGCCATTTTTCAAGTCTCCTTCCCAAACGCTTCATATTTTCATTCGTCGGCTTTTTAGCTTCCACTTTAGCCATTTCATTAAACACGAATCTCAGCATCGTCATCGTTTCCATGGTGGACAGATCCAATGAATCTATCATTAATGTCAAGGCATCTAACGAGTGTCTGTTAGTTGATGTACCTTTAAAAGTGGAAGCTGTCGAACAGCCTCCACCAATAAATCGCGGAGAATTTCACTGGAGTCCCGAGACCGAAGGACTA…	FFPIPDDFAKNMENEVLERRLSNIQITTTDQKYNLQRNRQKSTYHDCHFSSLLPKRFIFSFVGFLASTLAISLNTNLSIVIVSMVDRSNESIINVKASNECLLVDVPLKVEAVEQPPPINRGEFHWSPETEGLALGAVYYGQLFGFLPGGRMAEVYGGK	Major_Facilitator_Superfamily|PF07690.14	AAQ22561.1	56.2	148
TRINITY_DN13947_c0_g1_i1	type:internal	969	TTAGCCAAAAATCCATATGATAAGCCAGGAACTCCTGGTGTACCTGAAGTTGTGGATTATGATAAAGATTTTGTTCAATTGAAATGGGACAAACCTGCAAGGGATGGAAATGCTCCCATTACTAGTTATATAATTGAAAAGAAAGATAAGATTTCGGGAGAGTGGGTTAAAGCTGCAGAAGTACCAGGAACTGAAGGAAAAGTTGGAGGACTTATTGAAGGACAGAAATATGAATTTAGAGTAAAGGCTGTTAACAAAGCTGGACCAGGAGAACCCAGTGAAGCTTCTGTACCACATCTTGCAAAACCAAAATTCTTGAAACCTCGCATTGATAGAACTAATTTGAAGCACATGTCTATCAAAATTGGACAAACAGTCAACTTAGATGTCAATGTAATT…	LAKNPYDKPGTPGVPEVVDYDKDFVQLKWDKPARDGNAPITSYIIEKKDKISGEWVKAAEVPGTEGKVGGLIEGQKYEFRVKAVNKAGPGEPSEASVPHLAKPKFLKPRIDRTNLKHMSIKIGQTVNLDVNVIGEPPPEIVWQLNDAEVKPSETVRIDNSDYNTKFYLLRATRKESGVYTIIASNKVGKDTAQVEIFVLGKPSKPKGPLDVSDVHKEGCTLKWSEPEDDGGCPIEYYEVEKMDEDTGVWVPAGKSTTPKCDVTNLTPGKKYKFRVRAVNKEGDSEELETDGSTLAKNPFDEPSKPGRPEPTDWDVDHVDLQWA	PhoD-like_phosphatase,_N-terminal_domain|PF16655.3;Fibronectin_type_III_domain|PF00041.19;Immunoglobulin_domain|PF13895.4;Tissue_factor|PF01108.15;Immunoglobulin_domain|PF13927.4;Immunoglobulin_I-set_domain|PF07679.14;Immunoglobulin_domain|PF00047.23;Y_Y_Y_domain|PF07495.11;Aegerolysin|PF06355.11;Fibronectin-III_type_domain|PF16794.3;Purple_acid_Phosphatase,_N-terminal_domain|PF16656.3	NP_502274.2	361.7	526
TRINITY_DN13955_c0_g1_i1	type:internal	309	GTTCCCCCTTGTGAGACGGACGATGAATGCAGTGACAGCAAAAAGTGCAGAGATTCGGATGAAGAAGGGGTTAAAACCTGTCAATGCCCCCGAGGAAAAAGTGGAGAGGGTTGTGTAAAAATAGATGATTGCGAAACTGGGAAATACAAGAACTGCAAGGGTGATAAAGGAAAATGCATGTATGACGATTCGGAGGAAAAAGCAGTTTGCACATGTGAAGGTGGAAGAGTATTGGATGAGATAGATGGTTATTGCAAAGCTTGTGATAAGGATGATCAATGCAGTAATGGCAAAAAGTGCAGAGATTGG	VPPCETDDECSDSKKCRDSDEEGVKTCQCPRGKSGEGCVKIDDCETGKYKNCKGDKGKCMYDDSEEKAVCTCEGGRVLDEIDGYCKACDKDDQCSNGKKCRDW	T_cell_CD4_receptor_C_terminal_region|PF12104.6;EB_module|PF01683.16	NA	NA	44
TRINITY_DN13974_c0_g1_i1	type:internal	333	GAAATACATTTTTCTTGTCCAGAGTGTAAGAAGACTTTTTCTCATCAGTGGGAATTAAGTGCACATTTATGTACACCCTCCCGTGAAAGGCCTTATGTTTGCGAAATTTGCAAGAAAGCTTTCTTACGAATTGATCACTTCAAATTACATGTGCTTGTACACACAAAAGAAAAACCACATGTTTGTGAAATTTGTAATAAAACTTTTTCACGAATTGGTCACTTAAAAAATCATTTGCTTGTACACACTAACGAAAAGCCTTTTGTTTGTGAAATTTGTAAGAAGACTTTCCGTCGAAGTGACTTATTAATAAAACATGTGCGCGTTCATACC	EIHFSCPECKKTFSHQWELSAHLCTPSRERPYVCEICKKAFLRIDHFKLHVLVHTKEKPHVCEICNKTFSRIGHLKNHLLVHTNEKPFVCEICKKTFRRSDLLIKHVRVHT	HNH_endonuclease|PF14279.4;Sgf11_(transcriptional_regulation_protein)|PF08209.9;Vacuolar_sorting_protein_39_domain_2|PF10367.7;GAG-pre-integrase_domain|PF13976.4;LYAR-type_C2HC_zinc_finger|PF08790.9;Zinc-finger_double_domain|PF13465.4;Ta0938|PF11494.6;C2H2-type_zinc_finger|PF13894.4;KIAA1045_RING_finger|PF16744.3;DBF_zinc_finger|PF07535.10;C2H2_type_zinc-finger_(2_copies)|PF12756.5;Drought_induce…	BAE93334.1	123.2	179
TRINITY_DN13981_c0_g1_i1	type:internal	429	GAAATTGAAAATGTTTCCCAAGAAATTACTCGAATGTTTCATCATTGCCAAAAAATAATTCACCAAATTCGAGAAAGGAGTCGTGGAACTACTGCTCAAGATTTTCAGGTTAGCCAGAATGTTGTGTCATCCTTAGTTAGCTCTTTGCAAGAATTGTCCTCAAAGTTCCATTCGGCTCAGTCTGAACACTTACGACAACTAAGATCAAGAGAGGAAAAATCTCAACAGTTTTTTAACACAACTTATATATCAAGGAACAATGAAAGTTCAGTATTTGATTCATTAGATGACAGTTTTACTCAGAGTTTCTTAAGTGCTGGAGATCAACAGCTAATTGTAGAAAGTAATACTTCAATGGTTGAACAAAGAGAACGAGAAATTAAGCAGATAGTGAAATCC…	EIENVSQEITRMFHHCQKIIHQIRERSRGTTAQDFQVSQNVVSSLVSSLQELSSKFHSAQSEHLRQLRSREEKSQQFFNTTYISRNNESSVFDSLDDSFTQSFLSAGDQQLIVESNTSMVEQREREIKQIVKSIAELNDIFKD	Bacterial_protein_of_unknown_function_(DUF948)|PF06103.9;Mediator_complex_subunit_30|PF11315.6;Methyl-accepting_chemotaxis_protein_(MCP)_signalling_domain|PF00015.19;TATA_element_modulatory_factor_1_TATA_binding|PF12325.6;Exonuclease_VII,_large_subunit|PF02601.13;Fibrinogen_alpha/beta_chain_family|PF08702.8;Syntaxin|PF00804.23;Putative_coat_protein|PF14071.4	NP_001085029.1	118.2	362
TRINITY_DN14035_c0_g1_i1	type:internal	450	GAAATGATGGAGTACCAAAAAGATGATGATTCTAATAATGAAAAAGAAGCTGCTGCTGCACTTTCTAAGCTTATCAGTCAAGAGTTTAGTAAAAGAAGAGGATCTAAAGATAAATCTGAAAAGAGCACAAGGAGTAGTAGTTCAAAAGTAATACAACCTTCAATTAAGAAGATTCCTGAGGTTTCTGTTGCAATGCGTGAGAAATATTTTGATAAATTAGTAGAAGAAATAAAATTGCACATAAAATCTTGCACTTCCAATCACCGTTGTCCTGTTTTAAAGGATAAAGATATTCAACAATGTGCTGCTGATTTTGAATGGAATTCTTTTAGTTCTAAGGGAAATATTCATATGTACCGAAGAGAGATTGTAAATTTGACCAAGTCTTTGAGAGAAGCT…	EMMEYQKDDDSNNEKEAAAALSKLISQEFSKRRGSKDKSEKSTRSSSSKVIQPSIKKIPEVSVAMREKYFDKLVEEIKLHIKSCTSNHRCPVLKDKDIQQCAADFEWNSFSSKGNIHMYRREIVNLTKSLREASRQVEVHPLITNFMPNQ	non-SMC_mitotic_condensation_complex_subunit_1|PF12717.5;YqzL-like_protein|PF14006.4;Protein_of_unknown_function_(DUF1140)|PF06600.9	NA	NA	150
TRINITY_DN14047_c0_g1_i1	type:internal	339	GCTCCTGTTCCTAATCCTTGTTTAACATTCGGTTGCTTGCCAAGAACTCGATGCCTGCATCCACACCATAATCTTTATCCAACCTCAAGTCCACATTTTGGTTATGTACCAGCAAGTGTGCATCCTGCTCATCATCCTGCTATCAACAGCCAGCCAACATTTGATCAGATTTACAATTCTGTTACTGTCACAACTCCTTCCAACCACCATGATCCACCTACTATGCATCCACACCCCCCTCCTAATTTGGTTAGAATGAATCCTACACATTCTAGAATTTGGCAGTCTCAACAACGAATACAAGAAGTAAACCGAAGAAGATTCCATCAGAGATCGGAA	APVPNPCLTFGCLPRTRCLHPHHNLYPTSSPHFGYVPASVHPAHHPAINSQPTFDQIYNSVTVTTPSNHHDPPTMHPHPPPNLVRMNPTHSRIWQSQQRIQEVNRRRFHQRSE	NA	NA	NA	258
TRINITY_DN14060_c0_g1_i1	type:internal	483	CAGAAGGCGTTTTCTCTTAATGGTTCTTTGAAAAGACATTTGTTTATTCATACCAAGGAAAAGCCTTTTGTTTGTGAAATTTGCAAAGGCACTTTCTCTACAAAGTATTCTTTTAACATTCATTTGAGTGTTCATACCAATGTAAAGCCGTATGTTTGCGAATTATGCAAAAAGGCTTTCTCTGCAAATTATTATTTAAATAAACACATGCGTATACATAGCGATGAAAAACATTTTGTTTGTGAAGTTTGCAACAAGTCGTTTTCTGCTTGCTACCTTTTAAACAAACACATACGTATTCATACTGGTGAAAGGCCTTATAGCTGTGAAATTTGTGACAAAACTTTTCGTGAAAGAAGTGCTTTGAAAAAACACTGGCGTATTCATACCAATGAAAAG…	QKAFSLNGSLKRHLFIHTKEKPFVCEICKGTFSTKYSFNIHLSVHTNVKPYVCELCKKAFSANYYLNKHMRIHSDEKHFVCEVCNKSFSACYLLNKHIRIHTGERPYSCEICDKTFRERSALKKHWRIHTNEKPYVCEICNKSFCDNYYLKTHSQTHTKVK	PHD-finger|PF00628.27;zinc-finger_C2H2-type|PF16622.3;Zinc-finger_double_domain|PF13465.4;Hydrogenase/urease_nickel_incorporation,_metallochaperone,_hypA|PF01155.17;C2H2-type_zinc_finger|PF13894.4;KIAA1045_RING_finger|PF16744.3;DBF_zinc_finger|PF07535.10;Zinc_knuckle|PF13696.4;GAGA_factor|PF09237.9;AN1-like_Zinc_finger|PF01428.14;Zinc_ribbon_domain|PF09723.8;FYVE_zinc_finger|PF01363.19;Protein_of…	NP_001034328.2	172.6	446
TRINITY_DN14076_c0_g1_i1	type:5prime_partial	357	TTCCGATCTGCAATTCGAGCAATACGGAAAATTAAATATTTTGTTGCTCGAAGGAAATTTCAGCAAGCTCGTAAACCTTATGATGTTAGAGATGTTATTGAACAATATTCACAAGGCCATTTAAATATGATGGTTCGCATAAAAGAGCTTCAAAGAAGATTAGACCACACTCTTGGAAAACCTGGTTCATACCTTACAGAGAAAGGCATGAAACCTATGACAATAGGAGCTCGTTTACATCGCATGGAACAACAGCTGGTGAATTTGGACAGAAAAATGGATGTTGTGATATGCACAGTAAATATGTTAGTTGAAAAATTGACAAATGGATCTTTTAATGTGGAACAGGATGTATAA	FRSAIRAIRKIKYFVARRKFQQARKPYDVRDVIEQYSQGHLNMMVRIKELQRRLDHTLGKPGSYLTEKGMKPMTIGARLHRMEQQLVNLDRKMDVVICTVNMLVEKLTNGSFNVEQDV*	KCNQ_voltage-gated_potassium_channel|PF03520.12	XP_001647658.1	155.2	173
TRINITY_DN14085_c0_g2_i1	type:internal	309	GCCCGGACAGATTACTTGAAGGTATGTTCAATGGAAGATTATGAAGAATTCACAAAGACACATGCCGATGTCTTCAATAAGCACAAGCATAATACTTCCATGTCAGACGGAGGCGTTGCGGATGATTCCAACCATGACACCCCTACGAAAAAGTTTTCCAACAAGTTGAACGTCTTGACCAGATCGTTCACCGGGGGAGGTTCCAGAGACAGGTCCACATCCCCAGAGCCACCGGTCTCCCCACACGACCCTCCCGAGGACGACAACGGTGCTATTCCCAAAAGCGATTCAGCAGTTTCTCTCGACGTA	ARTDYLKVCSMEDYEEFTKTHADVFNKHKHNTSMSDGGVADDSNHDTPTKKFSNKLNVLTRSFTGGGSRDRSTSPEPPVSPHDPPEDDNGAIPKSDSAVSLDV	NA	NA	NA	76
TRINITY_DN14112_c0_g1_i1	type:complete	369	ATGTCTGCAGTATATAGGGCAGTAATAGCTTCTATTGACAAACGTGTTCCTTCTAGATTGCAACCGTTATGGTCACATGAAGCAGGTCCAAAGACTATATTTTTCTGGGCCCCAGCATTCAAATGGTGTTTGGTGATAGCAGGAATCGGAGATATGGCCCGACCAGCTGATAAGCTGAGTACCTCACAATCCACTGCTTTGGCAGCTACAGGTATAATTTGGTCTAGATATTCAATGGTTATTATCCCTAAGAATTACAGTTTATTCAGTGTCAATATCTTTGTAGCTCTCACTGGATTATATCAGTTATCAAGAATTTACAGGCATAAACAATCTTTGAAACAACCTGCCATTGAAAGTGCTCACTAA	MSAVYRAVIASIDKRVPSRLQPLWSHEAGPKTIFFWAPAFKWCLVIAGIGDMARPADKLSTSQSTALAATGIIWSRYSMVIIPKNYSLFSVNIFVALTGLYQLSRIYRHKQSLKQPAIESAH*	Uncharacterised_protein_family_(UPF0041)|PF03650.11	AAP06323.1	167.5	4596
TRINITY_DN14123_c0_g1_i1	type:3prime_partial	312	ATGAAGGGTATGAATGACTTTTTATACAAATTTCTTTTAGGTGAAAGGTATGTTTATCGATTTGTATCAGACCCCGAAACACTCTTGTCAGTTAACATCAAAGATCCACATCTAGACAAAATGGAAACTGTAAATGATTACAGTTCAAGGCAATCTTCTATTAATAGAAAAATGTACCCTTCAGATATGAACAACTTTCATAACCAATCTAATCACTATTCTAGAATTTCTCGAAATCCAGAACATCATGGATATCAGCCACTTTCTTGCTTACAGGACTTAACATCTGGTCCTACAACTAGAGACAGTCGA	MKGMNDFLYKFLLGERYVYRFVSDPETLLSVNIKDPHLDKMETVNDYSSRQSSINRKMYPSDMNNFHNQSNHYSRISRNPEHHGYQPLSCLQDLTSGPTTRDSR	Acetylcholinesterase_tetramerisation_domain|PF08674.8	NA	NA	85
TRINITY_DN14125_c0_g1_i1	type:internal	318	GTATGCTCTTCCGATCTGCCCGATGAAAAAACAGCTGTTTTACTGAAATCAGAAGGTAATGAGGGTGAACTCTCAGCAAGCAAATTTAATACTGTTGGCTATGACTTTATTTCAAAGTTACCAGGTATCAACTCTAAAAATATGTGGCCAATTTTAAGAAAGGCTGACAGTTTAGCAGATCTGATCAATTACAGTGAGGAAGAATTTAATACGATGTTTGGTAACTCTGGTGTCGCTAAAACACTTTGGCGAAGCATGAATGAAGAAATGCTTCCTGAAGCTCTACCTTCTACTAATTTGAAAAAACCTAAAAAACCG	VCSSDLPDEKTAVLLKSEGNEGELSASKFNTVGYDFISKLPGINSKNMWPILRKADSLADLINYSEEEFNTMFGNSGVAKTLWRSMNEEMLPEALPSTNLKKPKKP	NA	XP_001654742.1	59.7	96
TRINITY_DN1413_c0_g1_i1	type:internal	333	GAAGACAAATATTTTTTCCTGACATGCGGAAAAGCAGGGTTCAGGAATGCCAGAAACGAAACCTCAAGGGTTACTCTAAATTTTTACCACGATAACAAAAAAGTTCAAGAGCTTATATATAATCAAGAATACGAACTGAGAGCAGCTATGACAAAACCTGATGACATTCACAAGTTAAAAGTCAGGTCCTGTCTCAGTTTCTCTCCCAACACAACAGAAGTGCCGCTTATAGATGCAAATGGCTGTTCACTGACACGATTCCTGAGCGCTTTTCACTACAACGAGACGAGCCATTCTGCTCAATCTCTTTTGTCGCCAATATTTAAATTTCCA	EDKYFFLTCGKAGFRNARNETSRVTLNFYHDNKKVQELIYNQEYELRAAMTKPDDIHKLKVRSCLSFSPNTTEVPLIDANGCSLTRFLSAFHYNETSHSAQSLLSPIFKFP	NA	XP_971306.1	90.9	80
TRINITY_DN14154_c0_g1_i1	type:internal	327	TTTACATTCTTATTTTCAGCAGAAGATCAAATACATTTTGAATTTTTGCTAGAAAAAACAAAACGTCCAGAAGGTTTTCTTGGTGAGCGAGATGAATGTCTGGGTATTCTTTCTGTAATTGAAGATGTTTTTAATCTTATCAAGAAAAAGTGGCCTTCTGATGGAACTTTTGGTTTGGCAGAAATCAAACGCATTAAAAGATCTACTGAAAATTCATTCACAGTGTTAAGTGGCCATAAAAAATATATGAATGAAGTTGAGAATGAAATGAATGAAGCAGAGATTAATTGTGTTTTGGAACTTTTTAACCATAACTGGACTGTTATT	FTFLFSAEDQIHFEFLLEKTKRPEGFLGERDECLGILSVIEDVFNLIKKKWPSDGTFGLAEIKRIKRSTENSFTVLSGHKKYMNEVENEMNEAEINCVLELFNHNWTVI	Matrix_protein_(MA),_p15|PF01140.17	NA	NA	80
TRINITY_DN14156_c0_g2_i1	type:internal	336	AATCTTCGCATTCTAACAATTGAGCTACTTGAAATAGAAGAAACCTCTCCTGATCCTATTAAAGCTGAAAAGTGGTCTAATTATTTGGATACTTATTTTGATGAGGATTTTTGCTGTGAAGAACTTCTTGCTGAAGTTCAACAGCTGCCAGTGTTTTTAAAAAGAAATTTGAGAAAACAGATGTTGTTCTGGAAGAATAGAGTAATACAAGTAGAGAAACAGTGGCATCAAAGGCAATCTTCAAAGTCTATGAAAAAGCATCTACCTTTATCTGCTAGAAAAAAAAGAGCACTTTCCATTATTGCTCCCATACTGAGAAAAAAACCAAGACGCTTG	NLRILTIELLEIEETSPDPIKAEKWSNYLDTYFDEDFCCEELLAEVQQLPVFLKRNLRKQMLFWKNRVIQVEKQWHQRQSSKSMKKHLPLSARKKRALSIIAPILRKKPRRL	C-terminal_domain_of_Sin3a_protein|PF16879.3	XP_001142716.1	58.9	539
TRINITY_DN14169_c0_g1_i1	type:internal	435	ATCGTAGAGACCAAAAAGATCGATTTGAGTGGTACTGAAGGAAAATCTCATTCCAACTCTAAAGCAAAAGGTGGTACGTATTCGAAACGGAACGGCGAAAATGGCTTGCCGGGTTATCCCGGTGGATCCGGAGGATCTTTTTTTGGAATTGCGGAAAGGATCGTGAATGGTGAAAGATTAACAGTTTCTGCCAATGGTGGAAGGGGTGGACCGGGTCAGGAAGGTGGGTACGGATATCAGGGAAAAGAGGGAACCTCTCCCTCAGCTCCAAGAGACCTGCATTGTAGAGGCGATTACAGAGAAATTAAAGGGTTTAGATGTCAAAGACTGGATTATTTTTTTGACGAAGGTAAATGCTTTGGAATGGGTGCAACACGTGAGTGCTTATCCGATAGATGT…	IVETKKIDLSGTEGKSHSNSKAKGGTYSKRNGENGLPGYPGGSGGSFFGIAERIVNGERLTVSANGGRGGPGQEGGYGYQGKEGTSPSAPRDLHCRGDYREIKGFRCQRLDYFFDEGKCFGMGATRECLSDRCLCKYKMFGTSGE	Polycomb-like_MTF2_factor_2|PF14061.4	NA	NA	242
TRINITY_DN14197_c0_g1_i1	type:3prime_partial	489	ATGATGAATGGTACAGCAGAATCTGTTTCTCTTCCATCAAAGCCCCCAATTTTTCCAAGACCTCCTACTGTTGGGGAAGAAGTAAGAGTGTTTCATGATGCTTCTGGCCAAGTGATAGAATATAATAAGAGCTCCAAAAGAATGGAAGAAAGCCAATCCACCTGTGAAGGAGATAAACCTGATTCACTGTCCAAAAATGAGACAGAAACTACACAGAACAATGAGGCTTCGCTACCTCCCAACCCTAGTCCTCCAGCCCCATATAAATGGGCTCAGAGCTTACAATGTTTGTTAGACGATGCAAAAGGTGTTGCTTTGTTTGAACAGTTTTTAAAACAAGAAGGCCATGATACCAGGAGCTTGTCTTTTTGGTTTGCTTGTCGAGGGGTCAAGAAAACT…	MMNGTAESVSLPSKPPIFPRPPTVGEEVRVFHDASGQVIEYNKSSKRMEESQSTCEGDKPDSLSKNETETTQNNEASLPPNPSPPAPYKWAQSLQCLLDDAKGVALFEQFLKQEGHDTRSLSFWFACRGVKKTDPNDKEKLHKLINVLYDKKVKRINAISLAT	Ribosomally_synthesised_peptide_in_actinomycetes|PF14408.4;Regulator_of_G_protein_signaling_domain|PF00615.17	XP_001656733.1	64.7	91
TRINITY_DN141_c0_g2_i1	type:internal	537	CCAATCGAAATTTATCAAACACCTGAAAGGCTTTGGGCTTATTTCTTTAGATTTTCTCCTATTTCAGCTGGATTAACAAGATTACATATATTGGAAGCTATAAGAAGCAATGAAGCACTTCGAACATTTTTGGAACGATCTTCTCTTAAAGTGCTTAGTATTGGTAGTGGCCCCGGCAGTGATTTAATAGGACTGTGTAGTGCTCTGTTTGATAACGCTGATTTTCAGAAGCTGAACTTGACTCTAGTGGACAATAACGAACGTTGGAGATCTTTATTTCAAGCTATGATTCATGTCATTCGCCATGATGAATATGGAAATGCCAGTAAATTATTTCAAGAAAAAGAAATAAATTATTCTTTCATTTGCTCCGATGTCTTAAATACTGCTGCTTATTGC…	PIEIYQTPERLWAYFFRFSPISAGLTRLHILEAIRSNEALRTFLERSSLKVLSIGSGPGSDLIGLCSALFDNADFQKLNLTLVDNNERWRSLFQAMIHVIRHDEYGNASKLFQEKEINYSFICSDVLNTAAYCEALSNADVVWMKGLLSVLSNNTVRYRAIRAVISSMPVGSLLVVIDS	Methyltransferase_domain|PF13649.4;Putative_SAM-dependent_methyltransferase|PF11312.6;Lysine_methyltransferase|PF10294.7	NA	NA	44
TRINITY_DN14200_c0_g1_i1	type:3prime_partial	363	ATGTTGATTTCTCGTACGTTGGTGTTAAATCGCATTGTAAAATTTTTATGCAGACATGCTGGCGGTATTTCTGAAAATGCACAGACTGTTAAAGTTTTAAATGTCAAAGATAAAATTAATATTTATTTTAGATATAATGATTTTCCTTTTAAACTTGAGCGACCTATGACGGAAAGTGTAAATATAACGTTATCTCATATAAAACGTAGAGCTGAACTTCATCATAAGAAAGAATTAATTAAACAATATTATTTTGCTGATGGAGAAAGTGAAGTGAAAAATTCTGATAAAGAAATAGATGTATATTTAAAACAAAGTGACAGTATATTAGATGCAAATATACCAAATTGTGAAGCATGGGCC	MLISRTLVLNRIVKFLCRHAGGISENAQTVKVLNVKDKINIYFRYNDFPFKLERPMTESVNITLSHIKRRAELHHKKELIKQYYFADGESEVKNSDKEIDVYLKQSDSILDANIPNCEAWA	Vacuolar-sorting-associated_13_protein_C-terminal|PF16909.3;Transcription_elongation_factor_Elf1_like|PF05129.11	NA	NA	282
TRINITY_DN14214_c0_g1_i1	type:internal	420	CCCCTCGCAAAAATGGTGGAACGGACCTCTCAGAGTCCACTTAGCCCTGTTTCTCTCCTCTCACCTGGAGGACAAAGATGTGCGACGTCCCCAGAGTTCACCCCTTCCGATACGGACACCGGTCCTTTAGTGGACGACGACATCGACAAGCAATCGACAAAAATATCCGAGGACAATTTCGACCTGTCCAGCAAAGACAGCGTGGACAGCATTGACCAGGTCAAGCCGGTCAAGGCCAAGTCGGACAAGAAAAAAGAAAAGGCCGATAAGGCAACCCCCATCGTGGGCAAGTGCAACTGCGAAGAGCTGAAATCGGTAGAAGCCCACTTGGAAACAAAGGACCTTTGGGAGAAATTTCATGGTTTAGGGACCGAAATGATCATTACCAAGAGCGGAAGG…	PLAKMVERTSQSPLSPVSLLSPGGQRCATSPEFTPSDTDTGPLVDDDIDKQSTKISEDNFDLSSKDSVDSIDQVKPVKAKSDKKKEKADKATPIVGKCNCEELKSVEAHLETKDLWEKFHGLGTEMIITKSGRRMFPTVR	T-box|PF00907.20	AAL48858.1	89.4	51
TRINITY_DN14217_c0_g1_i1	type:internal	510	CTGTTTCCAGATAATTTGAGTCGATCATCTGAATCGGGGAAATCCATTGATTTGGGATTACAAAAAACACCTGATACCAGTTCTTCAAAAACGGACATTACTAGATCAGAGAAATTGAAAAGTACTGAGAAAAAGGAGAAGAAAAAATCTTCTTGGTATAATATGTTAAATCCTACTTATAAATCTCGAAGTGATGATTTCAAAAGGCTTTTTAAAGATCTCCCTGACTCTGAGCGCCTGATTGTTGATTATTCATGTGCTTTACAAAAAGATATCCTTGTGCATGGGAGACTATATGTATCTCAAAATTACATTTGTTTTTATGCAAATATATTTCGTTGGGAAACTTTTCTTTTAATTCGTTGCCGTGATGTCACAAGCATGACCAAAGAAAAAACT…	LFPDNLSRSSESGKSIDLGLQKTPDTSSSKTDITRSEKLKSTEKKEKKKSSWYNMLNPTYKSRSDDFKRLFKDLPDSERLIVDYSCALQKDILVHGRLYVSQNYICFYANIFRWETFLLIRCRDVTSMTKEKTARVIPNAIQISTETEKHFFTSFGARDKTFLMLFRIWQ	GRAM_domain|PF02893.18	XP_001370199.1	216.1	102
TRINITY_DN14227_c0_g2_i1	type:internal	309	CTTTTGCCTCATGGAAATAAGGCAGATAGACCACCTGTACTTTCAGCTGATGAATCCAGTACTCCATTAGACTTAGAAAATACTTTGTCTGATGATCCAAACAATTCAAATGATGAAGATGACGATGATGATTGCCCTGATGATGGAACCGGATCATTAACAGATTCCAGTCAACCTCAACCACCGAAAAGGGTTAAAATTTTTGAAGGTGGTTTCAAATCTAATGAAGATTACACTTATGTTCGAGGACGTGGTAGAGGAAAATATGTGTGTGAAGAATGTGGCATACGCTGCAAAAAGCCCAGTATG	LLPHGNKADRPPVLSADESSTPLDLENTLSDDPNNSNDEDDDDDCPDDGTGSLTDSSQPQPPKRVKIFEGGFKSNEDYTYVRGRGRGKYVCEECGIRCKKPSM	NA	AAS88585.1	91.3	80
TRINITY_DN14228_c0_g1_i1	type:internal	675	AAAAATAATATTTTGCCAAAGACTATGATTTCAAAGATAAAGTCAGTCTTAAAAGAAGGTTCCAGAATTAATAAAGAACTTGAAAATTTATATTCAGATATGCATGTTAGTGATTCTGAGGCAGAAATTAATGAAGAAGATTTGATGCATTCTGTAGCATTGAGGAAGAAACTTGGAAAGTTACAGGCTAAGATGGAGATGTTAGAAAATCCGGTTATAAGGTCATTTGTGACAAAGAAATATTCTCCTACAAAAGCATTGAGGAAACAACCCAAATCTAGTCCAGTAACTTATGTGGTGGCAAAACAGTTTTCAAAGGATATTGTTGAAAAATTATTATCTTTTGAAATAACATCAATCCTAGAGTTTCAACATAATCCAGAAAGCCCTTTCAAATAC…	KNNILPKTMISKIKSVLKEGSRINKELENLYSDMHVSDSEAEINEEDLMHSVALRKKLGKLQAKMEMLENPVIRSFVTKKYSPTKALRKQPKSSPVTYVVAKQFSKDIVEKLLSFEITSILEFQHNPESPFKYSSAGDRIYIFPGVYQCDALGWIEGDISVQGIGLNTDIVLEATGNSEVLLNCCAEKIKIENISLIAKSDLLSAIVVHHGEVELKNCIIDSNKA	NA	NA	NA	422
TRINITY_DN14246_c0_g1_i1	type:internal	426	GATTTGTGTCACAGAGAAACCGGAAGATGTTATTGTACGACTAAGGGTATTAATGGACCACATTGTAATAGATGTGATGAATCTAATCATTATGTTGGGAATCCAGAAGAAGAAAACGGGTCATGTTTCTACAATTTATCTATTGATTTCCAGTATACTTTTAATATGTCAAAACCTGAAGATCGTCATTACACAAACATAAATTTTATGAATATACCTGTAAAACCGGATGTCGATGTTGATTTTACTATTTCTTGTTCAGATTCTGCTCTGGTGAATATATCTGTCGCATCTTCTTCATCTCCAGAGAAATTCCTTGATGAAAATCATAAATGTGGAACATTTAAACTCCGCTTTTCTCATGATGATCATGTATTTGGTGCAGACAATTTAACCTTT…	DLCHRETGRCYCTTKGINGPHCNRCDESNHYVGNPEEENGSCFYNLSIDFQYTFNMSKPEDRHYTNINFMNIPVKPDVDVDFTISCSDSALVNISVASSSSPEKFLDENHKCGTFKLRFSHDDHVFGADNLTFYVYVFNFNT	Laminin_EGF_domain|PF00053.22	XP_001662616.1	171	224
TRINITY_DN14246_c1_g1_i1	type:internal	405	TGTCGCGGTTTAAATTGTAGGGATATTCAAACTTGTGATCAGTGTCAAAAGAACTCTCGCTGTGGGTGGTGTGATGATGGTAGTGGAACTGGCTTAGGTGTTTGTTTGGAAGGTTCTGCTGCTGGTCCAATTGTGCTTGGAAGCTCTGCTTATTCTTTGAACAATACCATATGTCCTGTTGGACAGTGGTACTTTACTTCTTGTCCTGCATGCCAATGTAATGGCCACAGCACTTGTGTCAATGGAACAGATAAATGTGTTTTGCCATGCCAGCATCTCACTGAAGGAACTCACTGTCAGCAATGCATGGCTGGGTACCACGGAGATCCAGTTAATGGAGGAAATTGTACTCCCTGTTTCTGCAATAACCATGGTGATTTGTGTCACAGAGAAACCGGG…	CRGLNCRDIQTCDQCQKNSRCGWCDDGSGTGLGVCLEGSAAGPIVLGSSAYSLNNTICPVGQWYFTSCPACQCNGHSTCVNGTDKCVLPCQHLTEGTHCQQCMAGYHGDPVNGGNCTPCFCNNHGDLCHRETGRS	Laminin_EGF_domain|PF00053.22	BAC34442.1	156.8	163
TRINITY_DN14253_c0_g1_i1	type:5prime_partial	765	AGTAGCAAAGGAGGAATACGTCCTGATGTAAAAGGAAAAATAGACTTCATTGATGTTCATTTTCGCTATCCAAGTCGTAAAAATGTTCTGGTTCTGCAAGGAATTAATCTCACTATCAATCCTGGTCAAACAGTGGCCTTAGTAGGATCCAGTGGATGTGGCAAAAGTACATTAATTGCTCTTCTTGAAAGATTTTATAATCCAGAAAGTGGACAAATACTTTTGGATGGTTTTGATATTAAGACAATGAATTTGAAACATCTGAGAAATTTAATGGCCCTTGTGAGTCAAGAACCTGTTTTATTTAACTGCTCTATAAAAGAAAATATAGTTTATGGAATTGAAGAAAAAGTATCAGATTCAGATATCGAAAAGGCTGCCATTACTGCTAATATTCAT…	SSKGGIRPDVKGKIDFIDVHFRYPSRKNVLVLQGINLTINPGQTVALVGSSGCGKSTLIALLERFYNPESGQILLDGFDIKTMNLKHLRNLMALVSQEPVLFNCSIKENIVYGIEEKVSDSDIEKAAITANIHDFIMHLPEKYGTVVGERGTQLSGGQKQRIAIARALVRQPKILLLDEATSALDTESEKAVQDALDQARQGRTCIIIAHRLSTVQGADCIAVIENGKIVEKGTHQELINKKGIYYKLIKRQYT*	NA	CAA46190.1	322.4	286
TRINITY_DN14267_c0_g1_i1	type:5prime_partial	675	GGTGAACTTTACAGTCAGATGATATTTGTAAATGGTTATGTTCATTGTGATCCTCATCCAGGAAACATACTTGTCAAGAAGGATGAAAGAACTAAAGAAGCACAGATTATCCTGCTTGACCATGGTCTTTATGTGGATTTAACAGACCAATTTCGAGTTGATTATTGTAATATGTGGCTAGCTCTCATGAAAGCAGATGTGAAAGGTGTGGAATACTGGGGGCGTAAACTTGGTGTTGGAGATCTTTATGGTCTTTTGGCCTGTATGGTGACAGCTCGTTCTTGGACAGCAGTTACAAAAGGAATTGAAAAACACAGTGTATCTTCTGAAGAAAAGCAAGAAATTAGAAATAATGCTGCAAATTATCTTCCTGAAATCACTACAGTTTTAAGTAGAGTC…	GELYSQMIFVNGYVHCDPHPGNILVKKDERTKEAQIILLDHGLYVDLTDQFRVDYCNMWLALMKADVKGVEYWGRKLGVGDLYGLLACMVTARSWTAVTKGIEKHSVSSEEKQEIRNNAANYLPEITTVLSRVPRQMLLIFKTNDLLRGIECSLGVKGAAGSFIAMSKCCIKALYNEKMKHCHSYFGTVQVLFRKSIAYTRIYLYQYYLWLMNLNIFSKLGIYS*	Importin-beta_N-terminal_domain|PF03810.17;Phosphotransferase_enzyme_family|PF01636.21	NP_001073199.1	252.3	294
TRINITY_DN1426_c0_g1_i1	type:internal	390	CAAATCGAAATAGGTATCCATGTTTTCGAAACGAATGCAAAACTCTTGTTCAAAACATTCGTAGAAAACTATTATGGAAACTTTTATAGCTGTGGAGAGAAAGAATTTCCATGTGACGGTTGCGAGAAAATAGAGACTCTAACTTTGATACAGTCTAAAAAGGATCTGCTGTATACTGTGAATGGTGAAACTAAATATTTGAAGAACGGTGTTCTCACTTTGTATTGCGAGTGTTTCTTCTCAACCAAAATCGTTTCTGAAACGATTAGGACTATCGATATTGGGATTGGTTCTGTTAACATTGCACCCCCAGCTGTAGTAGAAGTGGGTAGAGATTCCCCTGTAGAAACTGTGGGTGAACTGCCCACTGACCATGCAGTTAGTCTAAGA	QIEIGIHVFETNAKLLFKTFVENYYGNFYSCGEKEFPCDGCEKIETLTLIQSKKDLLYTVNGETKYLKNGVLTLYCECFFSTKIVSETIRTIDIGIGSVNIAPPAVVEVGRDSPVETVGELPTDHAVSLR	CHC2_zinc_finger|PF01807.18;LrgB-like_family|PF04172.14	NA	NA	52
TRINITY_DN1426_c0_g2_i1	type:internal	339	CAAATCGAAATAGGTATCCATGTTTTCGAAACGAATGCAAAACTCTTGTTCAAAACATTCGTAGAAAACTATTATGGAAACTTTTATAGCTGTGGAGAGAAAGAATTTCCATGTGACGGTTGCGAGAAAATAGACGCTCTAACTTTGACACTCTCGAAAAAGGATCTGCTGAATACTATGAATGGTATACCTAAATATTTGAAGAATGGTGTTCTCACTTTGTATTGCGAGTGTTTCTTCTCAACCAAAATCGTTTCTGAAACGATTGGGACTATTGATTTTGGGATTGGTTCTCTTAACACTGTACCCCCAGCTGTAGTAAAAGTGGCTAGAGATCCC	QIEIGIHVFETNAKLLFKTFVENYYGNFYSCGEKEFPCDGCEKIDALTLTLSKKDLLNTMNGIPKYLKNGVLTLYCECFFSTKIVSETIGTIDFGIGSLNTVPPAVVKVARDP	NA	NA	NA	137
TRINITY_DN14283_c0_g1_i1	type:internal	348	CACGATCGGTGCCGACGTGCCGGTCGATCCCTTGCTCGGATCGCCGTTCTTGACGCTCCACTCGACCTTGCCGGTCTTCGCATCGAGCGCAACCAGCGTGGTGTCGGCCTGATGCAGGATGATCTTGCCGTCACCATAAGCGACGCCGCGGTTGACCGTGTCGCAGCACATCACCGGAATGACGTTCGGATCCTGCTTCGGCTCGTACTTCCAGACGATCTGATTGTCCTTGGAAAGGTCAATAGCGTAGACCTTGTTCGGGAACGGGGTGTGGACGTACATCATGTTGCCGATGATCAGCGGGCCACCTTCGTGACCGCGCAGCACGCCGGTCGAAAACGTCCAAGC	HDRCRRAGRSLARIAVLDAPLDLAGLRIERNQRGVGLMQDDLAVTISDAAVDRVAAHHRNDVRILLRLVLPDDLIVLGKVNSVDLVRERGVDVHHVADDQRATFVTAQHAGRKRPS	PQQ-like_domain|PF13570.4;PQQ-like_domain|PF13360.4;Bacterial_protein_of_unknown_function_(DUF977)|PF06163.9;PQQ_enzyme_repeat|PF01011.19	WP_011969575.1	210.3	48
TRINITY_DN14287_c0_g1_i1	type:internal	795	AAAATTCGCACACCACGAGCTTCTAATGAAGCTAGGCAGACTCTATTTTCTAAGTTGTCAGGTGAAGTTCAAAGGAAAATAGGACTCAAAGCTCTTGAGCTGGGAGGCAATGCTGTAATAGGATATCATCAATGTTTTGACTTAGAGGGAGAATCTGGAATTGTTGTTCGTGGAATTGGAACAGCCGTGATATTGACTGAAAATGTGCCTTCTTCACAAAATGAAGTTTTAAGAGAGTCCCCAGTGTTAGAGGAACAGATTGTAGGTTCTGCTCCAGGTCCTAGTTCGCCTACTGAGAAAATTTGCCATTCTCCAGCAAAGGGTGCTATTTCTGCAGTACACAGAAGGTCTTCAGATTCTGATCTAAGCACAACTCCAAAAGGAGGAAGTTTTGGTGAT…	KIRTPRASNEARQTLFSKLSGEVQRKIGLKALELGGNAVIGYHQCFDLEGESGIVVRGIGTAVILTENVPSSQNEVLRESPVLEEQIVGSAPGPSSPTEKICHSPAKGAISAVHRRSSDSDLSTTPKGGSFGDNGSGLRSIQRPAVAQESLSMLEYPFITMRQFPVGFIQHVGGVVSARSVKLLVQINNPDEPETRDAWWTELRKEIRSHIRALGCNVVLGYMETTNISDEICVLSASGTAAVLSTSDHELMHLNTPPILSSSFQ	Putative_heavy-metal-binding|PF01906.15	XP_001652649.1	110.5	427
TRINITY_DN14312_c0_g1_i1	type:internal	372	GTGTTTGAAAGCTTGTCTATTGCGCAAGAATTAGGAATTGATGAACTGCGCATGTGTTGTGAAGATCATATCAATAGTACTTTGAATGTTCACAATGCTTGTACTTTTCTCCCAGCTTGCTTGGAGTTGGAAAATCGAATACCAGGAAACAAGGGAGGGCGATCTTTTGCTGACAGATGCACGGCATATATTGGTGAAAATGCTATGGAATGTGTTAAAACTTCTGCATTTTTGAATCTCCCTAAGGATGCTTTGATCCATCTCGTTTCATCTGATTATTTAGCTATGGAGGAAGAGGATGTGTGGAGAGCTGTTCTTGCATGGGCAAAACATCAAGCGGGTGTGACTCAGCCTACTGCTCACTGGACTGAA	VFESLSIAQELGIDELRMCCEDHINSTLNVHNACTFLPACLELENRIPGNKGGRSFADRCTAYIGENAMECVKTSAFLNLPKDALIHLVSSDYLAMEEEDVWRAVLAWAKHQAGVTQPTAHWTE	BTB_And_C-terminal_Kelch|PF07707.13	XP_967966.1	189.5	39
TRINITY_DN14315_c0_g1_i1	type:5prime_partial	354	TCTCTGTATAATATTTCTAAATGGCTGGATGATACTTTAAAATGCACTGAGAGTCCTCTGTTATTTCTGGTTGGTACAAAAAAGGATCAGGCAACTAATTCAGCATATAAATTAACAGAAAATGAAGCTAAGAAATTAGCAAATGCTATTGGTGCCGAATATTGTCCAGTTTCAGCAAAAACAGGAGAAAATGTAGAGAGACTTTTTAGGCGTATAGCTGTTTTGACCTTCAGTGAAAATATTTTAAAAGAAACAACTGAAACGGAAGACATAAAAATTTCAGAAAATTTTGTTAAATTTAACAAAACCAACAGCAAGAAAAGGAAAGGAAAATGTATTTCCAGCTGCAGCTGA	SLYNISKWLDDTLKCTESPLLFLVGTKKDQATNSAYKLTENEAKKLANAIGAEYCPVSAKTGENVERLFRRIAVLTFSENILKETTETEDIKISENFVKFNKTNSKKRKGKCISSCS*	Protein_of_unknown_function_(DUF3297)|PF11730.6;Ras_family|PF00071.20	NP_001116650.1	79.7	114
TRINITY_DN14316_c0_g2_i1	type:internal	405	CCTGTAAATGTTACATCTACATTTTTGATGACATATAGTAGCAATGGAGAGTTTGTCGCAACATGTCATGCAGACAATAGCATTTGGATAACTGAGATTTCCACTGGAAGATGTATAAGACAATATACTGGCCATACTCAAGGACCCTGGTGCCTTAAATTCCATCCTTCTTCAAATTCTACACTTGCTTCCGGAGATCATGGAGGAGAACTTCGAATTTGGAACAATGATGGTGATATTGTAAGGTGGCATTCAGACTATAATTCTGCGATTTGCTCAATTGATTTCCATCCTTCAAAAGAGATTCTGGCAATAGCTTCTGGTGATGCAATTTATTTTTGGCTGTGGAAAAAAACATCAGCACCGACTGGAATTTGTCGTACTTCTTCTGAAATTGAA…	PVNVTSTFLMTYSSNGEFVATCHADNSIWITEISTGRCIRQYTGHTQGPWCLKFHPSSNSTLASGDHGGELRIWNNDGDIVRWHSDYNSAICSIDFHPSKEILAIASGDAIYFWLWKKTSAPTGICRTSSEIERP	WD_domain,_G-beta_repeat|PF00400.30;Anaphase-promoting_complex_subunit_4_WD40_domain|PF12894.5	AAH45609.1	124.4	97
TRINITY_DN14327_c0_g2_i1	type:internal	375	ACTGGTCGAGCGAAACAAGCTTGTGCAAAACGAAAGTGTCCCAATATGGCTGTTCAGGAAGCTGAAGATGATGATATTCTGAATGATGTCTATGATGATGAAGACATTTCCAGTGATAAAAACTCTGTCAATGAAAAAAATCTATCTAAGCGTCATGCCTCAGCAAAACGGGAAGTAGCAGTGAAGTGGATTGATGATCCTTGCTTTGTAGAAAAGCAAATAAAATATTATGAATGTGCATATGTTAATGATGAAAAGGTTCATTGTGGCGATTACATAATGGTCATGCCATCAGATCCTACAACTCCAATGTATATTGCCAGAATTCAGTCAATGTTTGAAACATCTTCTGGAAAAAAAATGTTCCATGGAGAT	TGRAKQACAKRKCPNMAVQEAEDDDILNDVYDDEDISSDKNSVNEKNLSKRHASAKREVAVKWIDDPCFVEKQIKYYECAYVNDEKVHCGDYIMVMPSDPTTPMYIARIQSMFETSSGKKMFHGD	Transmembrane_domain_of_transglycosylase_PBP1_at_N-terminal|PF14812.4;TupA-like_ATPgrasp|PF14305.4;BAH_domain|PF01426.16;Protein_of_unknown_function_(DUF2441)|PF10386.7	AAL86596.1	94	80
TRINITY_DN14340_c0_g2_i1	type:internal	396	GCGCATTTAAAACAGTGTGGGAAAAGTGAAACTTCGAAAGTATATAACATTATGCATCGCGTACTAGGATCATTAGGTGTTGTTCTATATGCACTGCTACATCTTGTGGTGTGTTCGACTACGTCGACTACTACAGAAACACCAGATGCGCCCATGACAGTCATAGGAGTAGCAGGCTCCCCAGTCAACCTGCCGTGCAACATTACTCCTCCAGGCGAAGAAGACGCGGAGGACGCCATTGCCCTGGTTCTCTGGTATAAAGACGAGTCGACCACCCCCATCTACAGCCTGGATGCGCGGCAGGGTAGTCTTGATCAAGCTAGGCACGCTGCAAAGGACAGCCTCAATGCCAGGGCACATCTCAGTATATCAGAGCGGCCAGCTTTTCTGAAGCTG	AHLKQCGKSETSKVYNIMHRVLGSLGVVLYALLHLVVCSTTSTTTETPDAPMTVIGVAGSPVNLPCNITPPGEEDAEDAIALVLWYKDESTTPIYSLDARQGSLDQARHAAKDSLNARAHLSISERPAFLKL	Immunoglobulin_V-set_domain|PF07686.15;Immunoglobulin_domain|PF13895.4	AAK40237.1	60.1	54
TRINITY_DN14358_c0_g2_i1	type:internal	675	CAGAAAGTGTGGTACGACTTGATGCTCCGGGTGGGGCGTAGGGGTCGAGAGAGTCAGCGACTTTTGAATAGGAATTCCTTCAGGATTGCCAAGACAGCCGATGGGAGGCAGTATATCTATCAGGTTGATGATGAAGAGGCTGGCATTATTTTAGAAATACCTGGTGATCCCTTATGTCCGGTTAAAACACTGAAATTTTACTTAGGCCGATTAAATCCAGCATGCAGAGCCTTATTTCAACGACCAAAGGAACACATTTATGAGCAAGACACTTGCTGGTATGTCAATTCTCCAGTTGGCAAGAACATGTTGGCTACTATGATGTCAACCATCTCCAAGTGTGCCAGACTAAGCCGCATCTATACAAATGTTCGCATCCGAGCCACAACCTATTCTCCT…	QKVWYDLMLRVGRRGRESQRLLNRNSFRIAKTADGRQYIYQVDDEEAGIILEIPGDPLCPVKTLKFYLGRLNPACRALFQRPKEHIYEQDTCWYVNSPVGKNMLATMMSTISKCARLSRIYTNVRIRATTYSPADGKGCIPCTDVAEGPIREQEARDIKLPEKRPPEIAPKPVQVTQNSHIIKQLNAPIVQACLSVAVSNSLSSVTNAGSFINRVFPIALAGVPK	Protein_of_unknown_function_(DUF1392)|PF07154.9;Domain_of_unknown_function_(DUF3504)|PF12012.6	EAX01226.1	78.6	171
TRINITY_DN14359_c0_g1_i1	type:3prime_partial	327	ATGGAGAGTGATTTCAACAAACATTTCCTGTCCCATGCTGGACAGAAAACTTATGAATGTGAGATTTGCAAAAAAAGTGTCCAAAAAAAACACTTAAAACAACATTTATTAATTCATACTGGAGAGAAAGCTCATTTATGTGAGATTTGCAATAAAAAGTTCGCACAGAAGAATAATTTAAAAGTTCATTTACAAACCCATACTGGAGAGAAGCCTCACGAATGTCATATTTGCAAAAGAAAGTTCGGACGAAGGTATGAATTAAATAGACATACATCGATCCATACTGGAGAAAAACCTCATAAATGCAAATTTTGCAAAAAATGT	MESDFNKHFLSHAGQKTYECEICKKSVQKKHLKQHLLIHTGEKAHLCEICNKKFAQKNNLKVHLQTHTGEKPHECHICKRKFGRRYELNRHTSIHTGEKPHKCKFCKKC	C2H2-type_zinc_finger|PF13912.4;Sec23/Sec24_zinc_finger|PF04810.13;Synaptonemal_complex_central_element_protein_1|PF15233.4;Microtubule-associated_protein_CRIPT|PF10235.7;Zinc-finger_double_domain|PF13465.4;C2H2-type_zinc-finger_domain|PF13909.4;Zinc-finger_double-stranded_RNA-binding|PF12171.6;KIAA1045_RING_finger|PF16744.3;FYVE_zinc_finger|PF01363.19;Zinc_finger,_C2H2_type|PF00096.24;zinc-finge…	XP_001893102.1	125.2	244
TRINITY_DN14363_c0_g1_i1	type:internal	1197	AAACCTAATATAATATCAAAATCTGAATCACAGGATCAAGAAGTTTTTGTTTCTTCTAAAAATGAACTTGATACCTCTTCAATTACATTCTTAGATGATATTAGCAATAATTTAGACTCTGAAGAGAAACATAATGCAACCTTATCAACAGTTCCTTCATTAGAGAAAATTTACGATGACGTACAAAATTTCGTTCCATCTGTACAAAGCTCAGTATGGGATACATCTTTCAATGTAACAGAGTTCACAAACACATTGTCTGAACAGACAATCCCAGGAAGTTCACCTACAATAATTCAGATAATAAATAACCACACAGGTAAAAATCTATCCGAAGTAAATATTTCATACAAAGTTAAAGATTCAAATGAATCGCATGTAAATATCAGTATTTTTCAA…	KPNIISKSESQDQEVFVSSKNELDTSSITFLDDISNNLDSEEKHNATLSTVPSLEKIYDDVQNFVPSVQSSVWDTSFNVTEFTNTLSEQTIPGSSPTIIQIINNHTGKNLSEVNISYKVKDSNESHVNISIFQPTEDEAISNVTILPTVNSTIESNSDLYDKSTLMTTLSPVLQITEGNNQSHPSMHSTVNPFAPPFYNESEDSSQNILHETTFSFIDFNSTTFLTPISIENKTSPFLTSVEAGTTNAQLYSSDSNEQNVFNTDFEVNTEELDEDNGENNLIGYENYSKENTEDSLYSETNSESTNVQLLEITDEAFSFTVTDMPTTSMINNTDIPLKTTQGEEEFSESITVSATDSYSTLSETDSFSTTGFVRPAETSTPGTLNTISTSDTVLYNFSI	NA	NA	NA	181
TRINITY_DN14374_c0_g1_i1	type:internal	309	AAACTGTTGGATAAACCGTCTGACTTTTATCTTGCAAGTCCATTTTTAGATCAACTGGGTGCAGAGGATTCGGAAAAAATGATGATTCATCCTGGATGTTATAAATCGCATTTGCCATTACATAAGGTGCCATGGTCTGACGATGCAAAGTATATCTATGTAGCTAGAAATCCTAAAGATTGTTGTGTATCTTTTTACCATCACATGAAAGATATACCAGGTTATCAGTTTGCTGATGGCACCTTTGAAGAATTCTTCGACCTATTCACAAAAGGAGAACTAGAATTCGGTGAGATCGGAAGAGCGTCG	KLLDKPSDFYLASPFLDQLGAEDSEKMMIHPGCYKSHLPLHKVPWSDDAKYIYVARNPKDCCVSFYHHMKDIPGYQFADGTFEEFFDLFTKGELEFGEIGRAS	Sulfotransferase_family|PF13469.4;Sulfotransferase_domain|PF00685.25	AAY66863.1	90.9	88
TRINITY_DN14383_c0_g1_i2	type:complete	897	ATGATTTGGAAATTTATTACACCGCTTACGCGACGTTCTATCAATCAGGCAAAAATGAGTTTTCGTTTCCTTGAAACAGAAACCTCAATTCCTGTTTCCACTTCTCATTTTGAACGTCCTCCTCTTCCACTAATTACTTCCAGAGATCTTCCATATAAATCAAAGTATCAAGAGACTCGTCAAGCTTGGCTGTGTAATATGGATACTGTAGAAGAAGAAAAACTTGGACTAGTAGATTTGCATCCTTCAATATTCGCAGTCATGCCTAGATTGGATATTATTTGGCATAATTATAATTGGCAGAAGAAATATAGATTTGTTGATTTTGTTACTGAACCTTCCAGAGCTGAACTGCCTGGAGGTGGTCGTAAGCCCTGGCCTCAAAAAGGAACTGGTAGG…	MIWKFITPLTRRSINQAKMSFRFLETETSIPVSTSHFERPPLPLITSRDLPYKSKYQETRQAWLCNMDTVEEEKLGLVDLHPSIFAVMPRLDIIWHNYNWQKKYRFVDFVTEPSRAELPGGGRKPWPQKGTGRARHGSIRSPIFLGGGKAHGKRGPRTTFFMLNLSVRVSGLINTLTCKYAQDDLVIVDSLNIPTDDPKFIEELIEERKWGVSVLFINECDIMPRNITLATDKMESVTLMPFYGLNVYSMLKYDTLVLTLESLNRIEERLLFNLHRSDINQGKFNRTKFNQSVLMNSD*	Ribosomal_protein_L4/L1_family|PF00573.20	XP_970941.1	287.7	2913
TRINITY_DN14385_c0_g1_i1	type:5prime_partial	669	AAAAAAGATATTAATCCACGAATGCGAGCTTCTGCTTCAAATATTAGAAGTGTTGATGACCAAGGAGAAATAAGTGTTTTATTTGCACCTATTTCTGATAATATGGATTCTTTTGAGGATCCATCCTCAGTTTCAGAATATGAATGGAATCAATTTCGCGAGGACAAAACTTTTATACCCGTCCGAAGAGTGATAGAAGCTAACAAAAGTAAACCTGAAGATTCAGCAGCTACTCCTCATTCTATGTCAAATGCGGAATTAATGCATCATTTTTGGAAATTAAATTGTCGTTTGCGTTTCTCTTCTTATGCACTTCAACGATGGTATGCCAGTTTCGTATCTCTAGTTTTATTACGATGTTCAACTTATCTGGTTCATTGGTTAGGACACCCTGCAACA…	KKDINPRMRASASNIRSVDDQGEISVLFAPISDNMDSFEDPSSVSEYEWNQFREDKTFIPVRRVIEANKSKPEDSAATPHSMSNAELMHHFWKLNCRLRFSSYALQRWYASFVSLVLLRCSTYLVHWLGHPATMYDILQFALPLIMLVVLSTAIAEVNFEGQRLLRSIYPNELRIKPLQYMNLNPLQITVYGFGMTHGTIVTVVFAMLVGFVTKIVITEMTK*	Protein_of_unknown_function_(DUF2721)|PF11026.6	NA	NA	410
TRINITY_DN1438_c0_g1_i1	type:internal	552	GAAATAGAAACAATAATTGAAAACAGCGTACGTCAATATAACATTGCTCGGAGTGTTCCACAAGGTTTAGCACTGATTTATTTAGATTGGAATAGAAATTCGACCCACCCAGGAAAGTTGACAAGCGATGAAATCGAAGTGTTCCAAGGACGCAACATTCTGAAGTATAATATGAAGTATTCGTTCATTTGGAAGAAAACCTCTAATTATACAAAAGTTGAATTTTGGATAGAACTGCATGGAGTCCCGAATACGGAACCTTCATTTTGGAGCTCCTACACCCCAGAAATCGAAGCTTTTTGCAAGAAAATTAAGCTCACACCACTAGAGCCAGGTACTCCTTTCATCAATGGTAATTTCGTCCACATCGCTTACGACATGACGGAATTTTACTCTAAA…	EIETIIENSVRQYNIARSVPQGLALIYLDWNRNSTHPGKLTSDEIEVFQGRNILKYNMKYSFIWKKTSNYTKVEFWIELHGVPNTEPSFWSSYTPEIEAFCKKIKLTPLEPGTPFINGNFVHIAYDMTEFYSKLKTLNGRNVRFKMWLPKQKKCGTGFGKMTIKSFIAFYEEVNSESLPYQEAF	NA	NA	NA	284
TRINITY_DN14392_c0_g1_i1	type:3prime_partial	348	ATGATCATGTCATCTACTTCAGTTGTTAGAACCATAGGGAGGTTATCTCTACCCCTAACCATTGGAAGATCTCCCTCTGGGGAGAACACAGTATTGGATTTAACCCTGACCACAAATTCCCTTGTTGAAAACTATGATGTTGAAATAGTTTTTGATGATAATTTGAGAAATGAACCTGCTCTCGAGAGTAACCTTGAATTACAAGTAATGATTTTGGCTCCTTTTAAAGATGCTGTCAAAGTAACTGTTGTCGCAGATGGTGTTCCGGTAAATGTTGAGTCAGATGGTGTTCCGGTAAATGTTGTGTCAGATGGTGTTGCGGTAAATGTGTCAGTTCAAGCACCTGCA	MIMSSTSVVRTIGRLSLPLTIGRSPSGENTVLDLTLTTNSLVENYDVEIVFDDNLRNEPALESNLELQVMILAPFKDAVKVTVVADGVPVNVESDGVPVNVVSDGVAVNVSVQAPA	NA	NA	NA	108
TRINITY_DN14407_c0_g1_i1	type:internal	300	AAACCAGGAGAATTTAGTGCTGGGAGACTTCCTGGTGAAGTCCAAGCTGGTATTAAGTGGACTACGAAAAGTTCCCTCTCTGTATCTGAGGTTTCTACAGAACAAAAATCTGAAGATTTACCATCTGATAAAAAACCCACTGAAGTTCATGCATGTTTTGGAATATCACAACAAGAAGGCTTAGAAGTATCTCAAATGCTAGCTGAAGAAAAACCTGGTCAGTTTGCTCCTGGTAAATTACCGGGTGAAGTTAAAGCTGGAGTAAAACTACCAATAAAAGAATCATTGTCTGTCATTGAA	KPGEFSAGRLPGEVQAGIKWTTKSSLSVSEVSTEQKSEDLPSDKKPTEVHACFGISQQEGLEVSQMLAEEKPGQFAPGKLPGEVKAGVKLPIKESLSVIE	NA	NA	NA	170
TRINITY_DN14410_c0_g1_i1	type:internal	318	GCCTTTGAAGTCAAAGAAGGGGTTGAAGTTCCCCGTGATAAAACTGGTCTGTTACAGTTACTGGAATTGATGGAAGCACGTCCTTTCTATTTCGAGATGTGCTGGAAATGTCAAAAGCACACCGATTACGAAACGTGGCAAAAGGAACCTCCGAGTGCCAAGTTGAATGTCATCTTTGAAGTATTGTGGAGAGACCCTTGGGAACCCTTCTACATCGGTCGAAACGTGGCTCCATTTTACGACGAACGATTTCGACAGTATGGATTCAACAGGATAAGTCAAGTATGCGAGCTCCATGTCTCTGGCTACAAATTTTCC	AFEVKEGVEVPRDKTGLLQLLELMEARPFYFEMCWKCQKHTDYETWQKEPPSAKLNVIFEVLWRDPWEPFYIGRNVAPFYDERFRQYGFNRISQVCELHVSGYKFS	Glycosyl-transferase_for_dystroglycan|PF13896.4	XP_001379360.1	132.1	79
TRINITY_DN14423_c0_g2_i1	type:3prime_partial	417	ATGAATGTCTCGCACACATGTCAATTTTGCGAATGCAAATCAGCGGACAATCAGTTCGGTTCGGCCGAAGCCCCGTTATTACATACAACATATTCATTATCAAAAATGCACACATTCGATGAGATGGAAGAGAAACCTCCTGCTCCTCCAGTGCGGCTGACAAGTACAAAGGATCCTGTTCACTGTGTAGACCTCAAACCTTTGCCAAAGGAACCAGAAAATGAAAAGTGGAAGCTGAAAATAAAATCATCTAAAAATGTTAAAGAAAAGAAAAAAGATCCTGATAAGTTAGTTATTTCACCACCACTTAATTTTGAACACACTTTACATGTTGGCTTTGATCCTGATACAGGTGAATTCACTGGCTTACCAGAAACATGGTCTATGTTGTTGAAAAAT…	MNVSHTCQFCECKSADNQFGSAEAPLLHTTYSLSKMHTFDEMEEKPPAPPVRLTSTKDPVHCVDLKPLPKEPENEKWKLKIKSSKNVKEKKKDPDKLVISPPLNFEHTLHVGFDPDTGEFTGLPETWSMLLKNSNITKL	P21-Rho-binding_domain|PF00786.26	NP_002568.2	109	236
TRINITY_DN14434_c0_g1_i1	type:internal	393	GCTGGATACAAGGCCATCGTGGTCACTGCCGATTCTCCTGTCAATGGCATGTGGGGAGTAAATATGGTCCACAATCTCACGCTTCCCTCTCACCTTAGGCTTCCTAACCTTCAGGCCAAAGGTGAAGTCGAGGGAGCGGGATCCAACCTGCGCAGCAAAGTCGGTTTTTCCTTGCTCGACCCTACCCTAACTTGGAAGGATATCCAATGGATCCAGACATTCACGGCACTTCCTATTGTCGTCAAAGGAGTGCTCACTGCTGAGGATGCTGTTTTAGCTGTGGAACATGGTGCATCTGGGATATTGGTGTCAAATCACGGTGGAAGGCAACTGGATGGTGTACCAGCAACGTTGGACGCGCTTCCTGAGATAGTAAGGGCGGTGAAGGGTCGT	AGYKAIVVTADSPVNGMWGVNMVHNLTLPSHLRLPNLQAKGEVEGAGSNLRSKVGFSLLDPTLTWKDIQWIQTFTALPIVVKGVLTAEDAVLAVEHGASGILVSNHGGRQLDGVPATLDALPEIVRAVKGR	Thiamine_monophosphate_synthase/TENI|PF02581.15;Thiazole_biosynthesis_protein_ThiG|PF05690.12;FMN-dependent_dehydrogenase|PF01070.16	NP_001025624.1	132.5	140
TRINITY_DN14443_c0_g2_i1	type:internal	306	TTAAAACTAAATAATTGGACTTTGAATGATACGATAGCAAGTCAACGAAGCGATGCCGAAGTCAAGGAAATTGAGCTTCAAATAACTGTCGATCAAACCGCTCCACTTATCTCAGTAGACTTACCTCGAAATGAAAGTACTGCTCAAACCAATCAATTAATTCGAACATATTTACCTCGAAATAAAAATATCGTATCCAATGCCAGTGAAAATGACACATTTCGAAATAATTCATTTTTGAAACTGAAAATGTCTTCGAGTAATGTCTTCCCTGTGTTTGAAACTCAAGGTACAAGCAAACAAAAG	LKLNNWTLNDTIASQRSDAEVKEIELQITVDQTAPLISVDLPRNESTAQTNQLIRTYLPRNKNIVSNASENDTFRNNSFLKLKMSSSNVFPVFETQGTSKQK	Sperm_protein_associated_with_nucleus,_mapped_to_X_chromosome|PF07458.10	NA	NA	92
TRINITY_DN14453_c0_g2_i1	type:internal	414	GAGATGGTGGATCCTCCGGTCGTTACAACACCCACGCATATTCCCGAGCATCTACTGAATCTTCTTTTAGAAAAAAAAGTAGAAGAATTTGCCTTGGGGGAAGAAGAATATTTGATAGTTTATCCATTGAACGATAATACCGCTTGCAATCACGAAATGCATTGTGCAAAATACCAGTTCAAATTGCCTTCTGATAGCAAATCATCTGTACATTTATGGATAAAAAAGAAGATTCAATCTCTAGACGTAGAAGTGATGGCTTGTTTATCTCCTTCGCAAGAGAATATACCATGCGAAAATCAAGAACAACTGCGTGGAGTTAAATACGATTCACTCTGGTCTGCTTTTGAGCTTCCTATAGAATTTCTTACGAATTCTGGACCTGATCCATTATTCTGC…	EMVDPPVVTTPTHIPEHLLNLLLEKKVEEFALGEEEYLIVYPLNDNTACNHEMHCAKYQFKLPSDSKSSVHLWIKKKIQSLDVEVMACLSPSQENIPCENQEQLRGVKYDSLWSAFELPIEFLTNSGPDPLFCTVEIF	NA	NA	NA	86
TRINITY_DN14468_c0_g1_i1	type:internal	891	GAAGTGAAGCCAATGCTTGTTGTTTCAACTTACACATGTGATCAGTGTGGAGCAGAGACTTTCAAACCTATAAATTCCTTATCTTTTATGCCTCTCATTAATTGTGAAAGTGAAACTTGTCGCTTAGAGAAATCAGGTGGCAGACTATATTTGCAGACCCGTGGATCTAAATTCATCAAATTTCAGGAAATCAAAATTCAAGAGCTTAGTGAACAAGTTCCAGAAGGTAATATTCCTCGTACGATGACTATTCATGCCAAAGGTGAACTGACTAGACTTCTATTGCCAGGAGATCATTGTTGTATAACTGGTGTATATCTACCTATTGTTAGAACTGGATTCAGGCAAATGGCTCAAGGATTATTGGCTGATACATTTCTAGAAGCACATAGAATTGTG…	EVKPMLVVSTYTCDQCGAETFKPINSLSFMPLINCESETCRLEKSGGRLYLQTRGSKFIKFQEIKIQELSEQVPEGNIPRTMTIHAKGELTRLLLPGDHCCITGVYLPIVRTGFRQMAQGLLADTFLEAHRIVKMNKTEEDESNEQEMTQAEAEEIRNTYNYDMMASSIAPEIFGHHDVKKALLLLLVGGVDRNPNGMKIRGNINICLMGDPGVAKSQLLSYIDRLAPRSQYTTGRGSSGVGLTASVMKDPVTGEMTLEGGALVLADKGICCIDEFDKMMDSDRTAIHEVMEQQTIS	Magnesium_chelatase,_subunit_ChlI|PF01078.19;MCM2/3/5_family|PF00493.21;MCM_OB_domain|PF17207.1;Flp_pilus_assembly_protein_RcpC/CpaB|PF16976.3;AAA_domain_(dynein-related_subfamily)|PF07728.12	Q7ZXB1.1	470.7	519
TRINITY_DN1446_c0_g1_i2	type:internal	324	GGCTCCAAATATTCATATGAAGAAACTGATGATGATATGGAAAAGAGCTATGATGATATGAATCAATCTGATGGGGGCTCTTATTTTTCACCTCCCCATTCTACAAATGATTCACCAGAAGCTTTAGATATTAATTCTCTTGTGCAACTTGGTACAAAACTGCCTCTAAGACTTGATGCTGCAAAAAAAGTGCCAAAATTGCAAGTCTTAAATGAAGATCAGCCACCATCTCTAACTTTAAGAAAAGCTGGTCAGCCATCTTTTTTGAAACCAATGCAGCTATCATCTAAGAAAAAAGCTACTTCAAAGAAATCTAAAAAAGTC	GSKYSYEETDDDMEKSYDDMNQSDGGSYFSPPHSTNDSPEALDINSLVQLGTKLPLRLDAAKKVPKLQVLNEDQPPSLTLRKAGQPSFLKPMQLSSKKKATSKKSKKV	NA	NA	NA	21
TRINITY_DN14476_c0_g1_i1	type:5prime_partial	330	GGAGATGTCAGTCGTTTAACACCCATAAAACAGCTGTGTCCTGATTATATTGAATTTAATCATATCAAAGTTGTCATTGCATTCCTTGAAAGTAAATATGGACTGAAGGAAACTTCACAAGATGCAGATAGCTCTAACAAAGCAAAGGATATGTCATCTACCAGTGGAGATAGTGTGAAAAATGGTTCATCCAGTGCTTCTACTAATGTATTAGCTGCCTCTTCAGTTGAAACCAATTCTAATAAAAGAAAAGAAAGCGGCTATTTCTCACAATCCAGTGAAGTGCCTACAGTTAAAAAACTAAAAAGCAACAAACTTTTTAAATTATGA	GDVSRLTPIKQLCPDYIEFNHIKVVIAFLESKYGLKETSQDADSSNKAKDMSSTSGDSVKNGSSSASTNVLAASSVETNSNKRKESGYFSQSSEVPTVKKLKSNKLFKL*	NA	NA	NA	230
TRINITY_DN14481_c0_g1_i1	type:3prime_partial	351	ATGCAACAGTCAAATGATCAAACATCCTCTGAACTTATAGCCCCTGAAATTACTTTGGATGAAATTAACAATACAGAGTCCCGTGTTGTGGAGCACATGCTGGTGACAACTGAAGTAAAAGAAACTAATGAAACAGAAGCAAAACTCAGGACAACAATAACTTGTGATGATATTGTGGCTTCAGAACTGTTGTTGGAAGAGAAGAATTGTGATTCTGTACATGTTGAGGGTTCTTTTAACCAAAATATTATGGAATCTTTAAATAGTGACTGTACAGTCAAAATTAATGAGAATTTTATTGACTCAGAGAGGAATTTTCATAGTGAAGACATTGTGAAAAGTATATTGCCT	MQQSNDQTSSELIAPEITLDEINNTESRVVEHMLVTTEVKETNETEAKLRTTITCDDIVASELLLEEKNCDSVHVEGSFNQNIMESLNSDCTVKINENFIDSERNFHSEDIVKSILP	NA	NA	NA	71
TRINITY_DN14482_c0_g1_i1	type:internal	309	TTGAAAATGAAACCCATAATTATAAATTCATCATATGATTTTGGGTGTAATTCTGATGCCTCTCTAATATTAGATACCTCATTAGTGCTTTCTGCTTTTAAACATTTTGAATATCAAAGGACAAAATGTGAAGTTTCTTCCACTAATTTGCATGCAGATGAAGATATATGGGAAAGTAACTATGCAGTTATTAATAAAATCAATTTGTCCTGTAGCAAAAATTTGGGAAATACATCACCTATCCTAAATTTAAACAGTGAATCACTGAGCTCACAAAATATAGCCCCTGATAATTGTTTAAACGATACT	LKMKPIIINSSYDFGCNSDASLILDTSLVLSAFKHFEYQRTKCEVSSTNLHADEDIWESNYAVINKINLSCSKNLGNTSPILNLNSESLSSQNIAPDNCLNDT	NA	NA	NA	67
TRINITY_DN14491_c0_g1_i1	type:internal	507	TTAATGCATGTTTTACCATTTGCTTTACTTTTAAAGGAGCCCTCATGGATACAAAGGGAAACTAAAGGTGTTGCCCAAACTCGTGTTCCAGATTTAACCACATCTCAGTACGTGAAAGAATACCCCGAATCTAAAGAGTCGCAAAATGTGTTTACCATTGACTTTAAGCAGCGTCGTTCCTTTGGGGAATCGAATCGAAACCAGGACAACATGGAGAAAAATTGCAATTCGAATTCTTGCTCAAATGAAAATGGAATATATAATTCTATTTTTGAAGATTCCACGACTAACATTAATGAGGTGTACAGTTATCAGGGCAAAGAAGAAAATAACGAACAGGTCCAGAATGAGGAAGAAGGCGATCAAGATTCGTCTTCACAGCACCAACAGCAAGAAACA…	LMHVLPFALLLKEPSWIQRETKGVAQTRVPDLTTSQYVKEYPESKESQNVFTIDFKQRRSFGESNRNQDNMEKNCNSNSCSNENGIYNSIFEDSTTNINEVYSYQGKEENNEQVQNEEEGDQDSSSQHQQQETSVRKALVIILSDPVFHMISLSLGAFAMLIDPVFTVI	ZIP_Zinc_transporter|PF02535.20;Presenilin|PF01080.15	NA	NA	170
TRINITY_DN1451_c0_g1_i1	type:5prime_partial	396	GACTTTGATGAAAATATGGCGTTCGAAAGGGAAGAATTGAGTGATGAATTTGATGACGAATTTCAGGTGTCCAGCCCCGAGAGTCAAAGCATGCGTCAGATGACAAATTTCTCTCAGAACAACCATTCAACTTTCAAAAGACGGCGGAACCTTTCTTACAAATCGGAAGACCCGTGGTACCCAAAGAAGGAATGTTCTACTTCGCCGACCCCCGATGCAGAAGAGGTTTTCGTACGGTACGTCGCTTCCAAACTGCGACATATGGACAAATCTAGTCAGATGCTGTCCGAGAGGCTGATATCTGAAGTCCTGTTTCGTGGTCAGATGGGATTGCTGACCAGAAGCACGTCTCTTACCGGTGAAGATCCTCCACCCACTGTAAAGGTCGAAGAATGA	DFDENMAFEREELSDEFDDEFQVSSPESQSMRQMTNFSQNNHSTFKRRRNLSYKSEDPWYPKKECSTSPTPDAEEVFVRYVASKLRHMDKSSQMLSERLISEVLFRGQMGLLTRSTSLTGEDPPPTVKVEE*	NA	NA	NA	43
TRINITY_DN14533_c0_g1_i1	type:internal	321	CTTGGATTATCCCGAAACAAAAATATTGTTCATAAGCGTATGATTGTTGATCCCCATCGGGTAAATTGTCGAAGAGCTATAGTTGTTTGTGACACTACTGAGAGAGCAAAAGAATTAGCAGAAAAATTATCCCAAGTCAAAGTCATGAAAAGAACAATATGCGCTGTTGTTATTCAAACATTACTTTCTGATGTTTGTTTGTTTGAAAAACAAATTAAACAATATGGTGACAAGCGATCTCAACATCAATTTGTATATGTAACAGATCTTACTAGGTGCCATGAGCCAACAGGTCTTGTTCAGTACTTAAGAGAAAAGTTT	LGLSRNKNIVHKRMIVDPHRVNCRRAIVVCDTTERAKELAEKLSQVKVMKRTICAVVIQTLLSDVCLFEKQIKQYGDKRSQHQFVYVTDLTRCHEPTGLVQYLREKF	NA	NA	NA	76
TRINITY_DN14538_c0_g1_i1	type:internal	411	AAGAAAAGTGTTCTATTTGAAAGAAACTTAAAAGAAATACAATCCAAACAACCAAAAATATCTAAAAAGACAGTTACCGTGGTTGAAAAGCATACTATTGCATGCCCTGTTTGTTTGGAGATTTTTTCTTCCAGAGAAAAATATGATGTTCATGTGAGAAAAGGCTCTTGTGATCCCAAGAAGCCTTTCAAAAAGCAGAATTTCTCAGCCCGCAAGTCCATTTCAAAAGGACGCCGTGAGGTTAAGCAACCAGTTGATGACTGGCCTTCTGATAGTGAGGATCCTTTTACAGATTATAAATTTTCTTTAAGAAAGCCTACTAAGAAAAAAAGCAATATTCGCCCTTATTTAAAGAAATCTGACGTTTCGTGTATATGGTGTAGAGATACTTTTTCTTCA…	KKSVLFERNLKEIQSKQPKISKKTVTVVEKHTIACPVCLEIFSSREKYDVHVRKGSCDPKKPFKKQNFSARKSISKGRREVKQPVDDWPSDSEDPFTDYKFSLRKPTKKKSNIRPYLKKSDVSCIWCRDTFSSKQIG	Domain_of_unknown_function_(DUF1948)|PF09185.8;C2HE_/_C2H2_/_C2HC_zinc-binding_finger|PF16278.3;C2H2-type_zinc_finger|PF13894.4;C2H2_type_zinc-finger_(2_copies)|PF12756.5	NA	NA	118
TRINITY_DN14543_c0_g1_i1	type:3prime_partial	327	ATGTCAAATCCAGATCATAAAGTAATGCTGCATTGGGCAGAGGAAGCTAGATCTCCATTCAGAAAAAGCAAAAGCATACGGTTCACAAACGACATACAACCTTTGAAATATAACTTACTGCCTCCGCAAGCGTACAAGGCCAGAGAAGTTTGGACAGCAGGAAATTATACCTATCTGTACGCCAACTTCACCTTTGTCCGAAGAATCAGTTCCAGCTTGCTTAACGTTTACATTCCCAGCACCTTGGTGGTCTTTCTCTCTTGGATTTCATTCTGGTTGGATGTAGCAGCTGTCCCAGCTAGAATCACATTGGGGGTCACTTCTTTG	MSNPDHKVMLHWAEEARSPFRKSKSIRFTNDIQPLKYNLLPPQAYKAREVWTAGNYTYLYANFTFVRRISSSLLNVYIPSTLVVFLSWISFWLDVAAVPARITLGVTSL	Neurotransmitter-gated_ion-channel_transmembrane_region|PF02932.14	NP_001103243.1	72	114
TRINITY_DN14553_c0_g2_i1	type:internal	429	AATGAAACCAGGATACCTCTTGATATTCTTGATTCTTCAGAAGCTGAAGCTTGCTTTGAGGAACATAAAGCTGCTTTGGAAGCTGAAGAGCGAAGAAAAGAGATGCGCCAACAATTTAAAGAACTTTTGGAAGAAACTGGTTATGTTACCCCTGGTAAACCATTATCTGAAGTTCAAGTACTCTTCATGGGCCGTGAATGCTATGAATCACTTTCAGAACCAGATTTGCTAGAAATTTATGATGAACATCAAAGAGAAATAACTGAGAAGGCAAAACAAAACTTTCAAGAGCTGCTGCTTGAAAATGCTGAAATTTTTTACCATTTCACAAGTATTGGTCCTGGAAGTGTAATAACACAAGAAGATATTAATAAGATAACTGAAAAATTACAAGAAGAT…	NETRIPLDILDSSEAEACFEEHKAALEAEERRKEMRQQFKELLEETGYVTPGKPLSEVQVLFMGRECYESLSEPDLLEIYDEHQREITEKAKQNFQELLLENAEIFYHFTSIGPGSVITQEDINKITEKLQEDLRYKTLDRLD	FF_domain|PF01846.17;Protein_of_unknown_function_(DUF1488)|PF07369.9;Triosephosphate_isomerase|PF00121.16;Eisosome_protein_1|PF12757.5	XP_001653711.1	194.1	124
TRINITY_DN14557_c0_g1_i1	type:internal	309	GGAAGTCTATGCTGGAAATGGAGTGAAGAATTTACTATTGATAAAGAAGGCATGCTTATTGTGGAGCTTGATAGTAACATTTCAGCTATCATTCGAATAAAACAATTGTCAAGTTTCCAAAAACGGGTTATCATTGATGGGCAATTTAAAATTCATAGTCAGCTTAGTTATCCCATTCAGATACGCTGTGAATTTCCCACTTTTGTACCTGAAGAATCCAAAATTACAAATTTACTTCTGACAAAATCACTCGCACCCCGTCGCAGTTCTCCAGCATTTCTGTTGTCTGCAGAACAGTGTAAAAGTACG	GSLCWKWSEEFTIDKEGMLIVELDSNISAIIRIKQLSSFQKRVIIDGQFKIHSQLSYPIQIRCEFPTFVPEESKITNLLLTKSLAPRRSSPAFLLSAEQCKST	NA	NA	NA	88
TRINITY_DN14558_c0_g2_i1	type:3prime_partial	819	ATGGCATCGGAAAATGTGGGATCAGCCAAATTTCTGTCTGAAAACAACTGTATTCAAAACCTATCTGCTTTTCAAACTGTTTCGGATCCAATGAAAGAAAAAGAAAGAAAATCCTCCGATATTAATACTGAAAATTCCAAGACTTTAAACTCTGACCGCAATCAAATAATTCATAATTCTTCCCTTTACGAACAAATTCTACATTACGATGTGAGTTTTGTCATTAATAAACTTTTAGTAGCAGTTGAATCCGCTCTTAAATGTCCCCAAACAGAAGCCAATCCAAAATGTTGGTCTAGAAATGAAAATAAGATAGCAACGAAAGTGGATTCGGCTTATGTCATTCCAATTTTCGAAGTCACCAGTGTCGTACCTAAAACACACAAGGAAATGACTCAT…	MASENVGSAKFLSENNCIQNLSAFQTVSDPMKEKERKSSDINTENSKTLNSDRNQIIHNSSLYEQILHYDVSFVINKLLVAVESALKCPQTEANPKCWSRNENKIATKVDSAYVIPIFEVTSVVPKTHKEMTHPTCTQNSVLHLQTNIKSNKLKAIKMTNPEHLHLQKETLKQSMFQKIIKTVEAPEANNVNKTNALEMLQISNRENILSRNPSIKTKRGWENQLLGQKPVFRSKNHTLSLARIFSMKYEKLIRNSFKLPKRKQKPPGKIASR	NA	NA	NA	238
TRINITY_DN14571_c0_g2_i1	type:internal	678	TCTACTTTGACTTCAGATTTGGAGCATGCTAGAGAAAGACGAGTACATAACCGCTTTGCAACTGAGTATTCCACTTCTCAACAAAAGTCATTCTTTGATGACTCAACTCAGAATCAAGAAACTGGAATGACAGATACAGGAAGAGATAACTCTTTTAATGATAAAAGGCCCACTTCTCAAAATTTTCGACCACATCCCAGAAATACTACTTGGCCTCAACAAGATGAAAGAAAATCAGAAAATTCTCAATGGCCTGGAAAGCGTCCAGGATTACTGGATCCTCCTATTTCAAAAAATCATGATCCAATACAACCTGATCCAATTAATCCAGAGCTGCCTGCTCCTGGAAGGCCTTCTGATAAAAATCAATTTGGTCATAATGATCAATATGCACCAAAA…	STLTSDLEHARERRVHNRFATEYSTSQQKSFFDDSTQNQETGMTDTGRDNSFNDKRPTSQNFRPHPRNTTWPQQDERKSENSQWPGKRPGLLDPPISKNHDPIQPDPINPELPAPGRPSDKNQFGHNDQYAPKTSLLSLPRNDISSRNDERMRREPALQGDNQFQAPPMAVEIRELPPDVKVPEILDLFRDISVPPANICITVNNQKADKAYIHFSSSDECKEVLS	Papillomavirus_E5|PF03025.12	NA	NA	150
TRINITY_DN14579_c0_g1_i1	type:5prime_partial	468	AAAGATGAGAAGTCTTTACTTCAAGATATCTTTGAGGTGATGTCTAATAGACTTCAAAATAAGGCAGCCTTTCTTCGTCGACATGCTGTTTTGGTTCGGAATCACGCATTGATAGTTGATAGCTACATCAATGCACTTGCCCAACATCGTTCTTTCTTTCAAAGTGGGAAAGATTTAGCAGATTTAATTTGTGACATGCCACACAAATATAAAATTTATCAAAAGGTATTAGCACATAAAGACATCAGTGAGAAGGATTTGTTATCAGCATCAGATTATCAAGAATTCTTTTCTCTACATTCCATGGAGAGTTTTATCTCCTTATCAAAACAATGTGGATTTATATCATTATGTCTTTTAGATGCAATAGAAAAGGTTATTTATGAAGATATTCCTGAT…	KDEKSLLQDIFEVMSNRLQNKAAFLRRHAVLVRNHALIVDSYINALAQHRSFFQSGKDLADLICDMPHKYKIYQKVLAHKDISEKDLLSASDYQEFFSLHSMESFISLSKQCGFISLCLLDAIEKVIYEDIPDLLSEVDSIKSHVCSQKQTCRGV*	NA	AAH79725.1	121.7	232
TRINITY_DN14587_c0_g1_i1	type:internal	393	CTAAAATGTTCTGCTGCGGGATCTCCAAATCCTAGAATAAAATGGAAAAGAATCAACGAAAACTCAACTGTAGAACAAAATTTCAAGTCAATAAATGGGACTTTAGTTTTACATTCAGCTAGAATGGTGGATGCTGGAGAGTATGAATGTTCTGCTGACAATGACGTAACTCCACCGATTGCAAAACGTATACGAATACACGTAAATGTTCCTGCACGATTTGAAGAAAAATTCGCAGTAGTCAATGCAAAGAAAGGTGACAGTGCTCGGATGAAATGTGAAGCATTAGGTGACCAACCCCTCTCGGTAACATGGCAAAGAGATGAAACTACTATCAGCAAAAGTGGAGATGAACGATACGAGATATTTGAAACGCTTGTTCAGAAAGGTGTG	LKCSAAGSPNPRIKWKRINENSTVEQNFKSINGTLVLHSARMVDAGEYECSADNDVTPPIAKRIRIHVNVPARFEEKFAVVNAKKGDSARMKCEALGDQPLSVTWQRDETTISKSGDERYEIFETLVQKGV	Immunoglobulin_V-set_domain|PF07686.15;Immunoglobulin_domain|PF13895.4;Immunoglobulin_domain|PF13927.4;Immunoglobulin_I-set_domain|PF07679.14;Immunoglobulin_domain|PF00047.23;CD80-like_C2-set_immunoglobulin_domain|PF08205.10;Izumo-like_Immunoglobulin_domain|PF16706.3	BAE88011.1	55.8	138
TRINITY_DN14590_c0_g1_i1	type:5prime_partial	561	GATATTGTAACTGAATTTTTTAATTATGGTATCAACAGTATAATTTATCAGCGAGGTATATATCCTGTAGAATCCTTTTCAAGAGAAGAAAAATATGGGCTTGCTATTCTTATGACTAAAAATAATGAATTGCAAACTTTTATTTCTTCAATATTGAAACAGCTCCAGCATTGGCTATTGACTAAAGACGTTCATCGACTTGTTCTGGTTATATCAAATTATCATACTAAAGAAACTTTGGAAAGATGGGAATTTAATATCCAGTGTGAAGGAGAATTGGATTCTGGGGGCCAACCAAAATCTAAAGACATTAAAGAAATTCAGAAAGAAATCAGGAATATCATTCGTCAAATTACAGCAAGTGTTTCTTTTCTTCCTCTTCTAGACAATCAATGTTCA…	DIVTEFFNYGINSIIYQRGIYPVESFSREEKYGLAILMTKNNELQTFISSILKQLQHWLLTKDVHRLVLVISNYHTKETLERWEFNIQCEGELDSGGQPKSKDIKEIQKEIRNIIRQITASVSFLPLLDNQCSFDVLLYTSKDVNIPDEWAESTAHFIPEYEEVKLSNFSTTVHKVDTAVQYKACD*	HORMA_domain|PF02301.16	XP_001371546.1	206.1	525
TRINITY_DN14594_c0_g1_i1	type:5prime_partial	366	TCAGCAAGAAATTTGCTTGGAGTTCTGAGATTGTCCACTGCATTGGCTCGCTTGAATTTAAGAGACACTGTTGTAAAACAAGATGTGGATGAAGCTATTCGATTATTAGATATGTCAAAATCATCCCTCAACCAAACTCAGCAATTTACTGGAAGGGCACAAACAGCAACTGACCAAATCTTCAACATTATTAGAGATATTATGGCTGAAACTGGTGGTAGTAGAACTGTTAAAATGGCAGATGCACTGGAACGTTGTCTGGCAAAAGGTTTTAAACCAGATCAGTTTGAAGAAGCAATTGAAGAGTATGAGGAATTGGATATATGGCAGATTAACCAATCCAGAACAAAGATAACATTTATATAA	SARNLLGVLRLSTALARLNLRDTVVKQDVDEAIRLLDMSKSSLNQTQQFTGRAQTATDQIFNIIRDIMAETGGSRTVKMADALERCLAKGFKPDQFEEAIEEYEELDIWQINQSRTKITFI*	MCM2/3/5_family|PF00493.21	XP_001657714.1	139.4	438
TRINITY_DN14595_c0_g2_i1	type:internal	345	GATGGACAATTTTATTCTGATAAAAAGGAAATGCATGAAATAATTACTAATGGTACTTTTTCAGAACATTATAAAGATGAAATTCAAACTTCACTTAGTGATAAACCCATTACAAGTGCTGCTTATCCTAAAAATACCAATGGGGAATTTTTTTTTCATTTTGATAATGATTTTTCTGATGTTAAAACACAACAGGCATTTACAGAAGCTTCATTTGCTGAACATGAAAGTGACAACATTGGAACTACTGAGGAAACAAATTTAACTCTTTGCACTAATGTTCCTTCTGATAAAACTGAAAGTTTAAAGTCTCAAGCTCTAATTAAAAACATTTTTCTGGAAAAT	DGQFYSDKKEMHEIITNGTFSEHYKDEIQTSLSDKPITSAAYPKNTNGEFFFHFDNDFSDVKTQQAFTEASFAEHESDNIGTTEETNLTLCTNVPSDKTESLKSQALIKNIFLEN	Class_II_histocompatibility_antigen,_alpha_domain|PF00993.18	NA	NA	70
TRINITY_DN14601_c0_g2_i1	type:complete	666	ATGTCGCTGAGTTTCATGCGAGTCTTTAGAAGGACCATATTTAATCCACAAATTAGTTGGGCATTGAATAAACACACTTTGCCTGATCTTCCATATGATTATGGAGCATTAGAGCCAACTATCTCAGCAGAAATTATGCAGTTGCACCATTCAAAGCATCATGCAGCATATGTTAATAACTTAAACATTGCAGAAGAAAAATTAGCTGAAGCAACCGCTAAAGGTGATGTTGCTACAGCTATAAGCTTAGGACCTGCTATCAAATTTAATGGTGGTGGCCATCTTAACCATTCAATTTTTTGGCAAAACTTATCTCCTTCTGGTGGTGAACCACAAGGTGATCTGTTAAAGGCAATCAATGCAGACTTTTCTAGTTTAGATAAGTTAAAAACTCTTCTA…	MSLSFMRVFRRTIFNPQISWALNKHTLPDLPYDYGALEPTISAEIMQLHHSKHHAAYVNNLNIAEEKLAEATAKGDVATAISLGPAIKFNGGGHLNHSIFWQNLSPSGGEPQGDLLKAINADFSSLDKLKTLLSAAAVGVQGSGWAWLGFNPITKRLQIATCANQDPLQGTTGLVPLFGIDVWEHAYYLQYKNVRPDYVKEIWKVVNWKDIGERYSKAKSS*	Iron/manganese_superoxide_dismutases,_C-terminal_domain|PF02777.16;Iron/manganese_superoxide_dismutases,_alpha-hairpin_domain|PF00081.20	ABB05539.1	331.3	13090
TRINITY_DN14620_c0_g1_i1	type:internal	438	GGGATAGGGCGTAAAGTTTCATCATTTATTTTTGGTGTTATTCCAGCCCAGACTACTGAAACAAAACAACTGAATAGAGTGCTTTCTGCTCAAACAGATGATGGGGATTACTTTCTGTATGTCCTAAGCAACAGCTGTGTACAAAAATGGCATATAGCAAAAAAAGATAAAAAGGAAAACTATGATCAGCTTCTCTTTGAAGTTGATCTTGATCAAGAATTGAAACAAATCTATACTGAAGAGTTATTTAGTAATGATACGAATGTTGTACCTGGTTTAAAGGCATGGTGTTTAGATATGCAACTTTATCAGTCTGGAGTTATGATTTTAACAGCTTGCACAATACCAGTTAGCCCCGGTGGAAATGTGCATTATGGTTTTGGTTTTCTGGATACATCT…	GIGRKVSSFIFGVIPAQTTETKQLNRVLSAQTDDGDYFLYVLSNSCVQKWHIAKKDKKENYDQLLFEVDLDQELKQIYTEELFSNDTNVVPGLKAWCLDMQLYQSGVMILTACTIPVSPGGNVHYGFGFLDTSSIDQAQTFSSFNR	Nodulation_protein_Z_(NodZ)|PF05830.9	NA	NA	220
TRINITY_DN14623_c0_g1_i1	type:3prime_partial	315	ATGGATTTAGAAAATTGTGTATTGGATCTTATCATTAAAAATCCTAATGGAGTTACCAATAAAATGTTACAGACTGCTAATCCTTCAACTGGAGTGGCTCAGTTGGTTGAAGTGATAAATAAATTAACTGCCGCAGATAAAATACAGATATTTCATAAAGGCAAGCAATTGGTATACATGTTAAAGAACCCAGATTCTGCAAAGCATTGTAAAGGTGCTGATATTGAAGAAAAATTGATTTATCAACATATTGAAAAGGCTGGAAATAAAGGTATATGGGTAAGGGATCTTCGATTTGCAAGCAATATTCCTCAA	MDLENCVLDLIIKNPNGVTNKMLQTANPSTGVAQLVEVINKLTAADKIQIFHKGKQLVYMLKNPDSAKHCKGADIEEKLIYQHIEKAGNKGIWVRDLRFASNIPQ	RNA_polymerase_Rpc34_subunit|PF05158.10	NP_989319.1	92	49
TRINITY_DN14636_c0_g1_i1	type:internal	354	CATCACCATGGCTCGGTTTCCACGCCAACATCAAAAATAGGACATAGCTCCACTCCATTGCATGTAAATCCGCAAAATGCAAGTATTATGGGACCGCCGTCGATCGGTGTAGCTAATATTACTCTGAACAGTAATGCAACAACAAAGCCGCTGTTGGACATTTCTAGGACTAGCATACATCCTGGTTCCGTACTAGACACCAGCAGAAGGACTCCCAACATCACTTTGAAAGAAACGACAACAGCTGAAGATGATGATAGGCATGGAATATACCAGATGTTGGCATCGTTGGCGCTTCTTTGCGTCTTGAGTCTTTTGATGTCCTTTTTGGCATTATTCTTTCTTCAGAAACTT	HHHGSVSTPTSKIGHSSTPLHVNPQNASIMGPPSIGVANITLNSNATTKPLLDISRTSIHPGSVLDTSRRTPNITLKETTTAEDDDRHGIYQMLASLALLCVLSLLMSFLALFFLQKL	Jiraiya|PF15038.4	NA	NA	86
TRINITY_DN14650_c0_g1_i1	type:5prime_partial	1236	GGAAATGATTTAAGAACTACACATTCATTTCCAGACCTTGAAGAACTCACAAATCAAATATTTGATGATCTTCTAAAAACCAGGCCAGAGTTTCAGTATGATGGTATGGGTGTCATTGACCTGGAAAGAAAAAATGACACTGCAAAAAATACTTCCAAGCCTTCCAGTCTATTTCATCAAAAATGCTCTCAAAAAGATTCTGATGTACTACCATCTAAATACAAATCCTTAGCTAATGCTAAATCGGAAGCAACAAAGTTACATGTGGAAAATAAACCTCTTTTACCTCACAACCTTCTCAGAAGTAAAAGTGCATTTCATGATAGTATTGATTCAACTGCTTTACCATGTGTGAAAGATGGCCATTCTTCTGTAAAATTTGATTCGATATCAAATGAT…	GNDLRTTHSFPDLEELTNQIFDDLLKTRPEFQYDGMGVIDLERKNDTAKNTSKPSSLFHQKCSQKDSDVLPSKYKSLANAKSEATKLHVENKPLLPHNLLRSKSAFHDSIDSTALPCVKDGHSSVKFDSISNDFSHGKENFPLPNKIDVKSNVPLSNIDVEYGLAAALQSMDPNFAPDLIYSATKLAEKYFPRPCYSSTDFDGANSESFLQNLGINSSDINDMKSRHAQWSATKIHSVSHPPPRLPPRVRPSDQKEVVLPLDSSPTPNLDSTLVANDSFELDLDVDVTLRAQSDESLSPQIAFPTESSTQVEDASIEREFSKESPFPQPILRRLSYEPPPVPPKALARGPPPRPPSRQLVLSNPAFCLTSEDDLSDEDERLENDAKTDLNSLQQNYLNL…	NA	NA	NA	938
TRINITY_DN14655_c0_g1_i1	type:internal	588	AGGACTTTACCTCGAGAAAAATGGGGACAAACGATTTATTATAACGTTTTATATGAACACTTTTTACGAGAACATGACGAATGGAGACTTTCCACTTCATCGGATTCTTATCAAGAAAAATATTCAAATGAACTTAATTGTTCTTCTTTACGAACTTTCGAAAAAGTTAGATTTGTTGCGGCTGGATATACAAAATCAACATATAAAGTCAGGTTAAACAATCAAACATTATCTCTAAAAACTGTTAATGTAGAAGGTCATGATATTAACTCTTGTTTACTGGAAGAAGATCGATATCTATATGACTGTTTTTTGATAGCAGCTTCCAAACTTTTAAGAGAAATAGCAATATTGAGATCTATTTCACATATAAATATTGTAAAGGTTCTAGGATATTGC…	RTLPREKWGQTIYYNVLYEHFLREHDEWRLSTSSDSYQEKYSNELNCSSLRTFEKVRFVAAGYTKSTYKVRLNNQTLSLKTVNVEGHDINSCLLEEDRYLYDCFLIAASKLLREIAILRSISHINIVKVLGYCIPVDPDISDPRHTVAIFEEYGDPIDVIKLLQLSWEDRLKISLGLSRLLKHLSSFKEPIALNDF	Protein_tyrosine_kinase|PF07714.15;Protein_kinase_domain|PF00069.23;Protein_of_unknown_function_(DUF1479)|PF07350.10	XP_001382202.1	78.6	208
TRINITY_DN14672_c0_g2_i1	type:3prime_partial	318	ATGGCAACGCACGTTCGAATGGCCGCTTGCCCCGAACAAAAAACCCCCGACACTGAGCCGGAGGGCGAGTCCCTCAAGAACGGCACATCCCTCGAAGATTCGGACGACTCGACGGGCACCGTGATGGTTAAGAACCGCTCCCCCGCGCAACAACACAGGGAGATGGCGATGGACGGATTCCAAGATGGTGGTCCCAACAGTCGGCCTGCGAGCGCGAACCTGGAGGGCGGCTATCCCGCCTCCATGGAGAGGTCGCAGTACCAGGCTTTCAATCAAAGTACCGCGAACCGAGAGGGCGATGATTTCAGGAATTCGCAA	MATHVRMAACPEQKTPDTEPEGESLKNGTSLEDSDDSTGTVMVKNRSPAQQHREMAMDGFQDGGPNSRPASANLEGGYPASMERSQYQAFNQSTANREGDDFRNSQ	NA	NA	NA	104
TRINITY_DN14677_c0_g1_i1	type:internal	306	CAAAATATTTACAGAATTTTAATTTACAGGACAAGGCAATGTATAGCACATTCAACAATAAAAACAATTTTTATCATCACTGTACTGGACTGGAGGAGAGAGACCGTCATTCCTATTAAGAAATGTGGCAAAACTGATGGTACCCCTCAGAGTTATCGACCCATTGCCTTAACCAGTATTGCTTGCAAAATAATGGAGAAAATGGTTTTGAGAAGACTCACTTTTCACCTGCATTCCCACAATCTTCTCCCAGAGGAACAGTACGGTTTCAGAGAGGGACATAGTACTAAGATCGGAAGAGCGTCG	QNIYRILIYRTRQCIAHSTIKTIFIITVLDWRRETVIPIKKCGKTDGTPQSYRPIALTSIACKIMEKMVLRRLTFHLHSHNLLPEEQYGFREGHSTKIGRAS	Reverse_transcriptase_(RNA-dependent_DNA_polymerase)|PF00078.25	ABN58714.1	72.4	68
TRINITY_DN1468_c0_g1_i1	type:3prime_partial	324	ATGATGTTGGGTGAAGCGCAGGACCAGTGGCGAAATCGGGTGGAAGATAAAGATGCTAATCAGTTTACTGTGGCTGGAAAAATGGTCCAAATGCGATATTCTCCTCAGGCCAGTCCTGTCATCAGCAGGAAAAAATACAGCCCCAAACCTGTGCAGAGTCGCAGCAAAACAACCAACATTCAAGAGCTTTCCAGTTATCTTAGTCAAAGTACACCTTCTTCTCCTTATCATTTAAGCAAGAGTCAGTCTTCCTTGATCACAACTAGCAGTACCTCTGAACTTGAAAAGGTAACTAAAGTGAACACAGTTTCAGAGATCGGAAGA	MMLGEAQDQWRNRVEDKDANQFTVAGKMVQMRYSPQASPVISRKKYSPKPVQSRSKTTNIQELSSYLSQSTPSSPYHLSKSQSSLITTSSTSELEKVTKVNTVSEIGR	Protein_of_unknown_function_(DUF2476)|PF10630.7	NA	NA	122
TRINITY_DN14691_c0_g1_i1	type:internal	672	AAAATACAGTCAAAAATGATGGAACACAAAGGAACACCTAAGCAATCAGGTGAAAGAGAACTTGGAACTTTCCAATTCCCTGACCAATCAAAAAACACTATTTATTACGTAGCATTGAGAGCCATAGATGCTTCTCAAAACAAAGGACTACTATCTAACATGATTCAGGTTGTGATTGGTATAGAAAGAGATCCAACATCAAACATCACAGGAGGTAATATCACCGGAAATGGCACCGAGACTTCCACTGAGAGCATTAAAATAGTTCCGGAAGCTGATGATTTCTCAAAGTGTTATGTAATCATTGGGGGATTGTTAGGAGTCATTTTATTTATCTTAATCATCAACATTATAATATGGGGCACATGTTTTCGAAAATACAAAAATAGGTGTGAAGAG…	KIQSKMMEHKGTPKQSGERELGTFQFPDQSKNTIYYVALRAIDASQNKGLLSNMIQVVIGIERDPTSNITGGNITGNGTETSTESIKIVPEADDFSKCYVIIGGLLGVILFILIINIIIWGTCFRKYKNRCEESLTSTHERMIPEKIKADSDETVMKDRITNYHSYANPAMEEYPTSHERNEIKSNTPSPQPSVTYAQVNKREKSNSNVYPMRMMNNTNLKPEY	Domain_of_unknown_function_(DUF3827)|PF12877.5;Vpu_protein|PF00558.17;SHP2-interacting_transmembrane_adaptor_protein,_SIT|PF15330.4;Keratinocyte-associated_protein_2|PF09775.7;Transmembrane_52|PF14979.4;Calcium-activated_chloride_channel|PF08434.9	NA	NA	522
TRINITY_DN14698_c0_g1_i1	type:5prime_partial	339	TCCGATCTTGATGATAAAAAACCTACTTCTGCCAGTGAACTAGGCTTGCCTAATGTCGGAGGCGTGTTTGTAGTTCTACTAGCAGGATTGGGCATGGCTGCTATTGTAGCTGTTTTCGAGTTCATTTGGAGAACAAAAAAGATACCGCGGGATGAGCGAAGGATGATATTCATGGAAATGCTACACGAGTTGCAAGACATCTGCAAATGTCGGGGCTCCAGTCGTCCAGCTCCAAATTATTTGAATGGGGATTTCTCTCCTGGTAGCACGGACAATGGATTCGTATTGGATTCGGCAACCAGTTTCAATACTGTCTCCAGCCAGGACTTCCTCTCATGA	SDLDDKKPTSASELGLPNVGGVFVVLLAGLGMAAIVAVFEFIWRTKKIPRDERRMIFMEMLHELQDICKCRGSSRPAPNYLNGDFSPGSTDNGFVLDSATSFNTVSSQDFLS*	Ligand-gated_ion_channel|PF00060.24	CAA60854.1	68.9	152
TRINITY_DN14703_c0_g1_i1	type:complete	699	ATGAGTAAAAGCTGGTTCACGTGTTTTCTGCTGATGATTTTCATCGCAGGAACTGCATGTTTTTGGGACATTGATCCCAGCGAATACTGCCCAGATCCAAATGATCCCCTGTGTAAGCATCTGTTTAACGAAGGTATGAACCCTTCGTTTCCTGAAAAAGAACATCATATGCCAAGCTTTTGCAGAAAAATGAACGACTACTACAAATGTATCGATGCCAACTATACTGCAGAGAAACTGTGTGGAAGACCGCTCATTATGAAATCGGCAGAGACGATGGTTGGAGAATTTTGCTCGAAGAGGACTAAATTTTATAAAAGATTTCTCGAAAGTTTCGAATGCATAAAAACTATATTAAATTATACCAGCGGCGTTTGCCAGAATAATGCATTCTCCTCC…	MSKSWFTCFLLMIFIAGTACFWDIDPSEYCPDPNDPLCKHLFNEGMNPSFPEKEHHMPSFCRKMNDYYKCIDANYTAEKLCGRPLIMKSAETMVGEFCSKRTKFYKRFLESFECIKTILNYTSGVCQNNAFSSLRTLKITPGSTVFEINERMERCYLKTYEMECYGRQTMDACGTESHTTYKEISMRSSYYSADCMDYQHYFNALEAMGFVGLRLKLQTLKYPGESLPSKLM*	Chondroitin_proteoglycan_4|PF15481.4;PUB_domain|PF09409.8	NA	NA	667
TRINITY_DN14705_c0_g1_i1	type:internal	330	CCGTGTTTCAGCATACAAGCCAAAGGGAACTTCAACGGTTGGCGTGCTCACAAGCGGAAGAAGAGCGAGAATGAGAGTTCAGAAAACGGATCTGGATCCGAAGACGTCGTTCTCAACAACATGACTTCGCACAGCCCAAGCCACCCCTCGAATGGCGATCATGGTCACTGCAATGGTAGCATTCCCACTCTACAGAACACACCCAATAACAAGCGTCCCATCGCCAACCACAACAGTAACAGCCCTCAGAACTCGATCAAGAGCATCTCACTGTCCCAGTACCGGGAGCAGCAACACGCCCCCTGCAGCAGACAGATGTCCCTCAACAGC	PCFSIQAKGNFNGWRAHKRKKSENESSENGSGSEDVVLNNMTSHSPSHPSNGDHGHCNGSIPTLQNTPNNKRPIANHNSNSPQNSIKSISLSQYREQQHAPCSRQMSLNS	NA	NA	NA	100
TRINITY_DN14708_c0_g1_i1	type:3prime_partial	345	ATGGGTTTGTTACAATACCTACCGTCGCTTCTACCTTTCGCCGCCCTGTTGTACATGAGGGCGCAAGATGTATTTGTGCCTTTTGTCAAAGATTATTGGGATACTGAATACGATTATATCGTTGTTGGAGGTGGCTCCTCGGGAGCAGTGATTGCTAGTCGCTTATCGGAAGACCCCAACGTTAAAGTCCTGCTACTAGAGGCCGGTGGGCCCGAAAACCAGATAACTGATGTTCCTCTAGTGGCCGCCAGTTTACAGCAGACCCCAGTCGACTGGGCTTACCAGACGGAACCTCAGGAGGCGTCCTGTTTCGGCTTGAAAGGCAGACGCAGTCGCTGGCCCAGG	MGLLQYLPSLLPFAALLYMRAQDVFVPFVKDYWDTEYDYIVVGGGSSGAVIASRLSEDPNVKVLLLEAGGPENQITDVPLVAASLQQTPVDWAYQTEPQEASCFGLKGRRSRWPR	GMC_oxidoreductase|PF00732.17;FAD_binding_domain|PF00890.22;NAD(P)-binding_Rossmann-like_domain|PF13450.4;L-lysine_6-monooxygenase_(NADPH-requiring)|PF13434.4;Lycopene_cyclase_protein|PF05834.10;Pyridine_nucleotide-disulphide_oxidoreductase|PF07992.12;Thi4_family|PF01946.15;HI0933-like_protein|PF03486.12;FAD_dependent_oxidoreductase|PF01266.22	XP_015836551.1	103.6	140
TRINITY_DN1471_c0_g2_i1	type:internal	333	CAGATTCCAAAAGGAACCCTCATCCAAGCACCTGTTCATCTGATGCATCACGATCCAGAATTCTGGCCAGAACCGGAGATATTCGATCCGGAAAGATTTAACACTAAACCCAATGCCAATGGAATTACTTATTTGCCATTCGGAGTTGGACCAAGAAATTGCTTGGGAATGCGTTTAGCTCAACTTGAAGCAAAGCTAGCTGTGGCGCATATCATCAGCAAGTTCCGCCTCACTCTCGGCGAAAGACATAAGGATAAATTTTTAGTCACGAATCGTATCCGAACCCTATCTCCTCAAAAGGGAGTGTACGTCAAACTAGAACCCAGGAGTGGA	QIPKGTLIQAPVHLMHHDPEFWPEPEIFDPERFNTKPNANGITYLPFGVGPRNCLGMRLAQLEAKLAVAHIISKFRLTLGERHKDKFLVTNRIRTLSPQKGVYVKLEPRSG	Cytochrome_P450|PF00067.20	XP_001662605.1	96.7	319
TRINITY_DN14728_c0_g1_i1	type:internal	423	GATTATCAAGTATCATGCTGGATTGCACGGTTTTATGATGGTGACGAACTTCATAACCTTTCAGTAAGTTTAACCATTGAGGTTGAAGATGAAACAGGAAACCATCATTTCCAACGAAGAATTCCACCGATCACAATGGGAAAAGGGAATGACGATGTGACGGTACAAAGTTTGATCGCATGTCACACAGATTTGGAAAAATTTCACTATCCTGGCAGTGTTTCGTTACGTTTCAACTTTCAAGTCTCCGCGAATCGAATACAGACATCTAATTTCAACTTAAGTCCAGGACTGCAGATGTTATCATCAGATTTGGAGAAATTGTATTTGAGTAATTATCTAAAGGAAGCAATAATAATGGTAAAAGGCTCTTGGTTTTATGTGCATCTTGCTGTACTG…	DYQVSCWIARFYDGDELHNLSVSLTIEVEDETGNHHFQRRIPPITMGKGNDDVTVQSLIACHTDLEKFHYPGSVSLRFNFQVSANRIQTSNFNLSPGLQMLSSDLEKLYLSNYLKEAIIMVKGSWFYVHLAVLHARWPNFS	Baseplate_structural_protein,_domain_2|PF09096.8	NA	NA	84
TRINITY_DN14728_c0_g2_i1	type:internal	399	GCACGTTTATCTGAAGGCGACGAACTTCGTAAACTTTCAGTAAGTTTAACGATTAGGGTTGAAGATGAAACAGGAAACCACCATTTCCAAAAAAGAATTTCACCAAACACAATGGGAAAAGGGAATGAAAATAAGACCTTACAAAATTTAATAGAAAGTAAAAGAGATTTGGAAAATTTTCACTATCCTGGTAGTGTTTTGTTACGTTTCAACTTTCAAGTCTCCGCGAATCGAATACAGACATCTAATTTCAACTTAAGTCCAGGACTGCAGATGTTATCATCAGATTTGGAGAAATTGTATTTGAGTAATTATCTAAAGGAAGCAATAATAATGGTAAAAGGCTCTTGGTTTTATGTGCATCTTGCTGTACTGCATGCTCGATGGCCGAACTTCTCC	ARLSEGDELRKLSVSLTIRVEDETGNHHFQKRISPNTMGKGNENKTLQNLIESKRDLENFHYPGSVLLRFNFQVSANRIQTSNFNLSPGLQMLSSDLEKLYLSNYLKEAIIMVKGSWFYVHLAVLHARWPNFS	NA	NA	NA	23
TRINITY_DN14733_c0_g1_i1	type:5prime_partial	477	ACATGTTCAGCTATTTGCATCGTACCAACTGATTGCACCAACGGAACTGTCTGCATGAAGGGAGAAGGGGGTAAGCACTTCTGTGAATGTCCCCGAAATTTTAAGGGGGAGATGTGCGAAATCAGTGTGCTGTGCGAGGAGATAGAACGCACGTGTAGGGCCATGGACGCAGTGTGCGTGTTGAAAAATTCTGAAGCTTACTGCCAATGTCCCCCGGGGAAAAAAGTGGATTTGCAGTCAGGATTGTGTATAGATATATGTGATCCAGGTAAATGCGTGCATGGAACATGTGAAGTTGTCGAATTGGATTACAGTTGCGAATGTGATGAAGGATATACTGGTTTACACTGCGAAAAAGTAATCAAACCTATACCAAATAACTCTGTTCTGTGGACAGTC…	TCSAICIVPTDCTNGTVCMKGEGGKHFCECPRNFKGEMCEISVLCEEIERTCRAMDAVCVLKNSEAYCQCPPGKKVDLQSGLCIDICDPGKCVHGTCEVVELDYSCECDEGYTGLHCEKVIKPIPNNSVLWTVALLSVNTLICVMLFAIFCLLCCRRK*	EGF-like_domain|PF07974.11;Complement_Clr-like_EGF-like|PF12662.5;EGF-like_domain|PF00008.25;Human_growth_factor-like_EGF|PF12661.5;EGF_domain|PF12947.5;Coagulation_Factor_Xa_inhibitory_site|PF14670.4	XP_001899611.1	52.4	118
TRINITY_DN14745_c0_g2_i1	type:5prime_partial	306	AAGATTAGAAATGTTTCTGGAGAAATTATTTGTCAAGAGGAGGAAGTTAATTTACTACCATTGACTCATTTTCCTGACACTACTGTGAGCATGGCATCAGCTCAAATTCTCCAAAACCATGCTATCTCCTTTCCTGAAGAGAAAGTTTTAAAACAGCGGCATAAAGTTAGCATTGTACCAGTGGCTGCTGTTAGTTACAAATGGAGAAATCACGATGGATTATTTCATGTGTATGGATTTGAACAGCGTGTTTATGCTCCTAACTATCCTCAAACATGTTTTTGCTGCTGCTGCTCCATTTTATAA	KIRNVSGEIICQEEEVNLLPLTHFPDTTVSMASAQILQNHAISFPEEKVLKQRHKVSIVPVAAVSYKWRNHDGLFHVYGFEQRVYAPNYPQTCFCCCCSIL*	NA	XP_001742419.1	57.8	152
TRINITY_DN1476_c0_g1_i1	type:complete	303	ATGTCTTTAATAGAAAAATTTAAAATGTCTTCTAAATCAGAAGATATTGTTGGAGAAACTTGGGATTATTGTTTCGCAGATAGTCTTATCAAAGTTGGCTCCGGTCTTGCTGTAGGCTCTGTATTATCACTAGTCATGTTTAAAAGAAAGATGTGGCCAATTGTATTTGGAATGGGTTCTGGTTTTGGAATGGGATTAGCTAATTGTCAACATGCATTTCGGGATCCTCATTTAACAAAAATGTTAAATTACAAGTTAAAACAGAAAGAAGGGCAAAAATCTGAAAGTGCAAAGCAATCATGA	MSLIEKFKMSSKSEDIVGETWDYCFADSLIKVGSGLAVGSVLSLVMFKRKMWPIVFGMGSGFGMGLANCQHAFRDPHLTKMLNYKLKQKEGQKSESAKQS*	Domain_of_unknown_function_(DUF543)|PF04418.10	NP_001191012.1	85.1	4987
TRINITY_DN14774_c0_g1_i1	type:3prime_partial	525	ATGCCAAGAAATGTATTTGGTTGTGGAGAAAATGAAGAAATTGGTGGTCTGTGGATGGAAAAAGTACTTCAACTTTTCCAGATTTCACAACTCAACCATGGTCTAATGATGGTTGGTCCCAGTGGTAGTGGAAAATCAACAGCTTGGCGAGTGCTTTTAAAGGCACTAGAACGGTTTGAAGGTGTAGAAGGAGTGGCTCATGTCATTGATCCAAAGGCTATTTCCAAAGAGGCATTGTATGGTACTTTAGATCCTAATACTAGAGAATGGACAGATGGCTTGTTTACTCATGTTTTAAGAAAAATTATTGATAATGTCCGAGGAGAAATAAGCAAGCGTCAATGGATTATTTTTGATGGAGATGTTGATCCTGAATGGGTTGAAAATCTGAACAGTGTT…	MPRNVFGCGENEEIGGLWMEKVLQLFQISQLNHGLMMVGPSGSGKSTAWRVLLKALERFEGVEGVAHVIDPKAISKEALYGTLDPNTREWTDGLFTHVLRKIIDNVRGEISKRQWIIFDGDVDPEWVENLNSVLDDNKLLTLPNGERLSLPPNVRIMFEVQDLRFATLATVSRCG	Magnesium_chelatase,_subunit_ChlI|PF01078.19;AAA_domain|PF13401.4;AAA_domain|PF13671.4;AAA-like_domain|PF12846.5;Protein_of_unknown_function_(DUF3987)|PF13148.4;AAA_domain|PF13238.4;Type_IV_secretion-system_coupling_protein_DNA-binding_domain|PF10412.7;RNA_helicase|PF00910.20;Rad17_cell_cycle_checkpoint_protein|PF03215.13;AAA_domain_(dynein-related_subfamily)|PF07728.12;AAA_domain|PF13604.4;AAA_A…	XP_001658153.1	325.9	226
TRINITY_DN14792_c0_g1_i1	type:internal	360	ATTCATGTCAACCACAAACCTGTGAAATTACCTTACATTGAATTAGGTGTACTTACTGTATTCCAAGAAGATCGCAATGTCTTAGTGCGAACCAATCTTGGTATGAAAGTTTTGTGGGACGGAAATAGTTACCTGGAAGTTTCTGTACCCTCTTTCTTTAAAGATCATCTGTGCGGCTTATGTGGTAATTATAACGGTGATCCTAAAGACGACTTCAAGGCCAAAAGTGGACGCTTAGTCAGAACGGCGGAGGATTTCGGTAATTCTTGGAGGGTTGGTAAAATGAAACGTTGCGTTATGTCTCAGCCCTCCACAACGGACATCATGAGAAAGCGCAATAATGAAGTGCATGTAAGAGCC	IHVNHKPVKLPYIELGVLTVFQEDRNVLVRTNLGMKVLWDGNSYLEVSVPSFFKDHLCGLCGNYNGDPKDDFKAKSGRLVRTAEDFGNSWRVGKMKRCVMSQPSTTDIMRKRNNEVHVRA	von_Willebrand_factor_type_D_domain|PF00094.23	AAH30871.1	87.8	98
TRINITY_DN14799_c0_g1_i1	type:internal	390	GAAAATGCAGGTCCAAATACTTTAGTTACCACAGTTGTAGCAAGTGATATAGATGGTGACAATGTAATGTTTGGTTTTTCTGGTGGAAGTACTAGAGCGGGAATGTTTGAAATAGAAAAACGAACAGGTGTTATTCGTTTGATTGATGGAACAATTCATTTGGATAAGGATAAATATGAATTGAATGTCACTGCAAAAGACGATGGGGCTTGTTGTAAAAATGGTGCTTTAACCACCCACACCAGTACAGCTCTTGTGGTTGTTTTTATAACTGATGTAAATGATAACAAACCTGTATTTGAAAACTGTGACAGTTACAATCCAAAAGTTGAAGAAAATGCCGAAAGTGGAACATTTGTTATTAAGGTAGAAGCTACTGACCAAGATAAA	ENAGPNTLVTTVVASDIDGDNVMFGFSGGSTRAGMFEIEKRTGVIRLIDGTIHLDKDKYELNVTAKDDGACCKNGALTTHTSTALVVVFITDVNDNKPVFENCDSYNPKVEENAESGTFVIKVEATDQDK	Cadherin_domain|PF00028.15	BAD91057.1	183.3	58
TRINITY_DN14802_c0_g1_i1	type:internal	477	GCCTTGGAAGATAATGAAAAAGATGATCAAAAGTATGATTGTGACACTGATACTGAGTCAAAATGTAATTTTGAGCATATGCAAACGGGGGAAAGCGAAGAATCTCCTTTGGCCAAAATGGAAAGGGCCATTAAATCTGAAAAATGTGATAGTATTCTGTCGGAGAAATTATTTCCAAAGGTTAAACAAGAAGAATTGATGTTTGAAGATGGACTTCGAGATAAATACAACATAAGGAAGATGTTTCCTAAAGATGATCTTCTTCATTCTCATGTCGATGACTCACAGATGATTACATTTTTACAGGGATGTATGTCACAAAATGATGATGTCCTAAGTCAAGCTAGTTTCAATCTTGAATCAGAGATGGGTGAGCCTACTGTAGCACAATTACTTGCT…	ALEDNEKDDQKYDCDTDTESKCNFEHMQTGESEESPLAKMERAIKSEKCDSILSEKLFPKVKQEELMFEDGLRDKYNIRKMFPKDDLLHSHVDDSQMITFLQGCMSQNDDVLSQASFNLESEMGEPTVAQLLAFTNGNAVRWPKDKVLQIRLEHIVHAV	Chordopoxvirus_A33R_protein|PF05966.10	NA	NA	78
TRINITY_DN14806_c0_g2_i1	type:internal	642	CAGCTTGAGAAAGTATGGATTGCTATCGTGGTGTTCGTTTTCGTGAGCGAAATATGTGCACAAAGAATTCGTTTCCCGGAGAGAGAAACGGGACCCAACAACATCAATGAGAACTGTCCACCCGGAACTCAATGCATAGAAATTAACAGATGTCGAGGCAACGCCTTAAGGTCAATCAGAGGTGAGCCAAGAGAGTGTGGCTATTCTTATAACTGGAGAAGAAGGATATGTTGTCCAGAAAGAACCGGAAGAATAGGCCCAGTTCCAAGACCGCAGTCTACTCCTGAGCGAAATGTTCCTAATCGACCTGTTCCTGACCGAAATGTTCCTAATCGACCTGTTCCTGACCGAAATGTTCCAAACCGAGGTATTCCTAATCGAAGTCTTCCTGATCAACCA…	QLEKVWIAIVVFVFVSEICAQRIRFPERETGPNNINENCPPGTQCIEINRCRGNALRSIRGEPRECGYSYNWRRRICCPERTGRIGPVPRPQSTPERNVPNRPVPDRNVPNRPVPDRNVPNRGIPNRSLPDQPPRPVAANPRPINTNRECGRSNAVTGFILGGEEAEQGAWPWMAAILMRDRTGTLAAWCSGFVITRRHILSAAHCFDRRNTSL	Trypsin|PF00089.24	XP_001654733.1	30.8	72
TRINITY_DN14815_c0_g2_i1	type:internal	372	GGGAGTCCTCCTTATGCAGCACCTGAACTTTTTGAAGGCAGACAATACAATGGACCTAAAGCAGACGTTTGGAGTTTAGGAGTTGTTTTGTATGTGTTGGTTTGTGGAGCTCTACCTTTTGATGGCAGTACATTGCATTCACTTCGGAACAGGGTGTTAGCTGGAAAATTTAGAATTCCTTATTTTATGTCTAGTGAATGTGAACACCTGATACGACACATGCTGATTGTAGACCCTGCAAAGCGATTAACTCTAGACCAAATCATCAAGCATAAATGGATTGTGCAAGAGGCAGACGAGGAGTTCGATCGCACCCTCAAGAAGTACGGTGTAAATGGCAGCGTGGAGGAAGAGGAACCCCTCTGTGAGGTG	GSPPYAAPELFEGRQYNGPKADVWSLGVVLYVLVCGALPFDGSTLHSLRNRVLAGKFRIPYFMSSECEHLIRHMLIVDPAKRLTLDQIIKHKWIVQEADEEFDRTLKKYGVNGSVEEEEPLCEV	Protein_tyrosine_kinase|PF07714.15;Protein_kinase_domain|PF00069.23;Kinase-like|PF14531.4	ABZ10536.1	179.1	132
TRINITY_DN14819_c0_g2_i1	type:internal	426	GATATCGATTTCATTTTTTACTGGGCTAGTAGTTTAACTGAATGTGACCCTGAAGTACTGATTGAACAAGAAATAATTAGGTTCAACGAAGAACTACTCAAATCTGCATTTCTAACTTCAATACGCATGTGTGATACACCAGTGAGTGAGTATATGTTTGAGAAGCTAAGACCTGAAGATAAACTAATTTTAACATATTTGTTTGAGGAAACAGCAAAAACTATTTGCGAATCGTATCCAAGTCATTCTAAGACAAAATTTGTCTACCCAGATGTGCTTTGTTGGCTGTTGCACAAACTTGATGAGAAAGAGCGGGAAAGAATGTTCGAACTGCATTCTTTTCCAGTGCTTCCTTGCTATTTGGAATGGCCAAAGCAGGAATCATTCATTCAAATGATA…	DIDFIFYWASSLTECDPEVLIEQEIIRFNEELLKSAFLTSIRMCDTPVSEYMFEKLRPEDKLILTYLFEETAKTICESYPSHSKTKFVYPDVLCWLLHKLDEKERERMFELHSFPVLPCYLEWPKQESFIQMIKCLLKFLST	NA	NA	NA	170
TRINITY_DN1481_c0_g1_i1	type:internal	366	ATCACTGAGCCTCCAAGTACTTCAAATACAAAGGACCAACTAAAAACATCCACTCCTACAAAAGAAGAAAACGATATAGACACAACAAGCACTGAGACGCCTGATACTATACAGTACACTTTAGTAAATCCAGTAGATTCTACAATTTTAGATAGAACAAGTTTAAATCACGAAAAAATAATTGATTATGCTACCAAACTTGCTGAAAGCTTAGGAAATCTTCACCATGCAGAGGAACCAGACGATTACCACGACGGAGAAGGTACGGTTTTTGTAACAACAGAAGGCGACTCAACCCCAACAATCGAATCAACAGGTACCACCGAACCTCTTCATGTTATTCCTGTATTTTTTGAGAGCGACGAA	ITEPPSTSNTKDQLKTSTPTKEENDIDTTSTETPDTIQYTLVNPVDSTILDRTSLNHEKIIDYATKLAESLGNLHHAEEPDDYHDGEGTVFVTTEGDSTPTIESTGTTEPLHVIPVFFESDE	NA	NA	NA	57
TRINITY_DN14821_c0_g2_i1	type:internal	603	GTGGTTGAGATCCTTGCTCCTACAGTGTATTCATTAGGTTCTTCATTTCCTAATTTGAATAATGTTTTTGCTGATGAATCGGATTACCTGAATTTTATAGACTTTCTTTGTAATCGGCAAACTCGCAGAAACATTTTAATAAAGGATTTAAAGAATAAAACTGATGAATTTAGAAAAAACTTATTAGCTATTGACAATGAAAATTCTAAGTTGAAAGAGGAGAAAACTGTATTAAAACAAAATTTTGAAGCTCGAAATATGAAAGTGCAAAGTTTAGAGAATAAATTGATTGCTTTTGAGCAAGATAATCAGATGTTGGAAAAACAGCTCTCAGATTGTCAAGAAGAATTAGAAAATACCAAGTCACAGCTTCAAAATGCAAATAAACTCCTCCATGAT…	VVEILAPTVYSLGSSFPNLNNVFADESDYLNFIDFLCNRQTRRNILIKDLKNKTDEFRKNLLAIDNENSKLKEEKTVLKQNFEARNMKVQSLENKLIAFEQDNQMLEKQLSDCQEELENTKSQLQNANKLLHDQRKEVENYKIKMQEKVATEKERMRRIMAKRLAEKQAELECKMCITDEKFRQLREILNSDDWDFVGDGI	Leucine_zipper|PF15294.4;Fusion_glycoprotein_F0|PF00523.16;V-type_ATPase_116kDa_subunit_family|PF01496.17;TPR/MLP1/MLP2-like_protein|PF07926.10;SBDS_protein_C-terminal_domain|PF09377.8;Reovirus_sigma_C_capsid_protein|PF04582.10;Filament-like_plant_protein,_long_coiled-coil|PF05911.9;Modifier_of_rudimentary_(Mod(r))_protein|PF07200.11;IncA_protein|PF04156.12;Fibrinogen_alpha/beta_chain_family|PF08…	XP_001429711.1	56.6	226
TRINITY_DN14825_c0_g1_i1	type:5prime_partial	495	TGGCACTGCAAGAAACACATCACTTATAACGTTGATCAGCTTTTATTTGAACACTGCACTGCTAAATTTTCAGATAATACTCAATGCTGTGTTCCAGTATTTGACGTTTGTCATGAACTTCCTTTATGTTTTGAACATGCTAAAAAAAGGGATAATTATAATAAAATGGCTTCTGAGCCCAAGCCAAAGAAACCTAGGAAAAAACCAAAGCCATCCGCGTTAACAAGACCACCTAAGCGAGGCAAAAAGAAAAAGAAGCCAACTTCTGTCCGTCCCACCACACTTCCTTTGCCACTGCCTCCATCATTACCTTCTACATCACAGCCCTCTAGTTCTCAACTAACTGAAATGCCAAATGTCAATTCATTTTCTAATGAAGCTGTTAAGTCTATAGGAACT…	WHCKKHITYNVDQLLFEHCTAKFSDNTQCCVPVFDVCHELPLCFEHAKKRDNYNKMASEPKPKKPRKKPKPSALTRPPKRGKKKKKPTSVRPTTLPLPLPPSLPSTSQPSSSQLTEMPNVNSFSNEAVKSIGTVLPISDLNKEINGDLHAELGSDLEDFFSRCY*	Potential_DNA-binding_domain|PF13891.4;Pneumovirus_attachment_glycoprotein_G|PF00802.17	XP_001656570.1	91.7	214
TRINITY_DN14827_c0_g1_i1	type:3prime_partial	834	ATGAATAAAATTTGGAGTTGTATTGTAATTACATGTCCAACTTTATCGTCTGTAACAGCCACAGAAAGAGAAATTGAATTTTTAAAGAAAAAGGGAAGAATACCAGATTTTGTAGCTGTTTTGACCATTGAAGACCCAGCCAAAAATTTAGGAAGTGGAGCTGCTACTCTCAATGCCCTACTAGTTGCTGTTGAATATTTGAGTGCTAAGCAAAATTATATGGTTTTATCTTCAGATGTTTTATTGCAAGAACATATTTTGATTTTACACAATGGACGAGATTATTTGTACAGCTGCTCTGGTAAAGCTTTTATTTCTCTACCTATTGAATATGAAATTAAAGATAAATCAAGACCATATGCAAGTGGTATTGTGAACAACCTAGAGTCAATTTTTCGG…	MNKIWSCIVITCPTLSSVTATEREIEFLKKKGRIPDFVAVLTIEDPAKNLGSGAATLNALLVAVEYLSAKQNYMVLSSDVLLQEHILILHNGRDYLYSCSGKAFISLPIEYEIKDKSRPYASGIVNNLESIFRLIDELSCESPYGVWVCSTDMFILQKEKQLNTIIWENVADVVMFCIPSEIEYATGHGVVSIDEKGYVSNIYYCEPFNQIKDLVQGDGKVPLVSGLVFLKTNVAESLLSLHIRSPLESCTYLGLDCGNEPIQVSLYFDLLVAMSTGI	Nucleotidyl_transferase|PF00483.21;Protein_of_unknown_function_(DUF1507)|PF07408.9;L-fucokinase|PF07959.10	NP_001108290.1	108.6	317
TRINITY_DN14831_c0_g1_i1	type:internal	312	AAAAGAGCTGTAGATATTCTAGTGAAAGATCTCAGTCATTTGCAATGTGTCGAACATATCCTGAATGTTCAACTTCATCTAGTCAATTTTGCATTATCATGTCTTAGTAATGATAGTCTACCTCAAAGCATTAGTGATCAAGGTAATACAAAAGATATTGATGATCAAAGAGGTGGTTCGAAGAACTCAACAAATGAACAGAGAGAAGAATTTAATGTAACATTAAGTAGGAAATCAAAAATCATCATGGAAAAACTGAAGCAGCCTTTTTTTACATTAAAACAAAAGCATGTATCTCCAGATCGGAAGAGC	KRAVDILVKDLSHLQCVEHILNVQLHLVNFALSCLSNDSLPQSISDQGNTKDIDDQRGGSKNSTNEQREEFNVTLSRKSKIIMEKLKQPFFTLKQKHVSPDRKS	NA	NA	NA	102
TRINITY_DN14836_c0_g1_i1	type:complete	315	ATGAAATGTATTGAATTGAACTCTTGGAAATCAACTTTATATGAAGAAAAATTGTGTATTAAAATACTACAAGAATTGGAACAGCTTTTAACTGCTGAGAAGAATGATCTTTCTATCATTGAAGAAGAAATGTTTTCCTTAAAAAGTTTACGACAACATGAGAAATCAAATTGGATTAATTTGTATCATGAGCTTATTAAAATGATTGGAAGAAACCATAAACATAAAGGCTACTTCAAACAAATCTTTAAGAAAAAATTAGTCCAAAAAGAAGATAGAAAATCTCATTTGCTTTATTGCAAGATGAAGTTATGA	MKCIELNSWKSTLYEEKLCIKILQELEQLLTAEKNDLSIIEEEMFSLKSLRQHEKSNWINLYHELIKMIGRNHKHKGYFKQIFKKKLVQKEDRKSHLLYCKMKL*	Domain_of_unknown_function_(DUF4924)|PF16271.3;IncA_protein|PF04156.12	NA	NA	310
TRINITY_DN14837_c0_g1_i2	type:complete	492	ATGCTAAGTGTCCTTATTCCAAGTTTTCGTCAAGTTCAAGGGAACCATGGAAAACACTTCACAGTGTTTCAAATTGAAGTTTATTCATCAGGAAAGTGTCATAAAATAGAACGAAGATATCGTGCCTTTCACTCTTTACATAAGCAGTTGAAGCATATTCTTAATGCTCCTGAATTTCCACCCAAGAAAGTTCGTAATTTGAATCCTAAGGTTCTTGAACAACGGCGAAAAGGCTTAGAATCTTATATTCAAGAACTTCTGAGACGTAAACCAGTGCCTAAACAATTATTAAATTTTTTGTCACTCCCTGGTATTTCCCCAGCTTCTAGTTTGAATTCATTTACTGCTGAAGAAAGCAGAGAAATAATTCACCAACCTGTTGTGATGTATAATCCTCAT…	MLSVLIPSFRQVQGNHGKHFTVFQIEVYSSGKCHKIERRYRAFHSLHKQLKHILNAPEFPPKKVRNLNPKVLEQRRKGLESYIQELLRRKPVPKQLLNFLSLPGISPASSLNSFTAEESREIIHQPVVMYNPHLYVEDDRTSTLPNIVSKGLLMAFYSSDEGD*	PX_domain|PF00787.22	NP_001095119.1	125.2	482
TRINITY_DN14855_c0_g2_i1	type:internal	1002	TGCCAAAACGAAAAATCTGAAACCAGAAGCGAGAAATCAGATGGCGATGAAAAGTCTGACGTCCATCACGATGATAAATCGGACCATCAACACGATGGAAAGTCGGACATGATGGATGACGACCAAAATGAAAGGAAATCTGACATGCATGAGGATGACAGATCAGATTCACACTTTGATGACCGATATGATGATTATGGTGGCAAAGAAGCTGGAAATTATGAATTTCAAGAAAATACTCGATCTCATGCGTTTGGTAATGAGCAACTCAATATCGAAGAATCAAACACATATGATTTGCAATACGAAAGCCATGAAATTCATGAAGAAATTCAATCTAGGGTAGCCTATGATGATTTAGGAATAAATTATGAAACTTCTGATATTCATGTTAAATCT…	CQNEKSETRSEKSDGDEKSDVHHDDKSDHQHDGKSDMMDDDQNERKSDMHEDDRSDSHFDDRYDDYGGKEAGNYEFQENTRSHAFGNEQLNIEESNTYDLQYESHEIHEEIQSRVAYDDLGINYETSDIHVKSYDRKTTDIHEKYEQNPQDFEYDTKRSENSDIHDESNIDRKESNIYDESHIPSGGYGDIDKTNEKLIPGPDTFTTTHMDDASLTSENFQKNISRDDRYDSYENQLQSDLEKLDAKSEGVHDHHEYMKSEDFDALHAGSIHNKNEDLGITEHKDFQTINSSAYLEDRSLTEEKLKESTDHHVLSSQLTDVSDDISPQHSENFS	NA	XP_001309979.1	56.6	316
TRINITY_DN14883_c0_g1_i1	type:complete	546	ATGGTTGGTGGAGCCATTATAGCTGCTGCAGATGATCTTTCATTTGAAGTCAGGGGATACTTGTTTGTTTTATGCAATGACTTTTTTACTGCAGCCAATAACATATGTGTAAAAAAGAAATTAGATGCCAGAGATCTAGGAAAATATGGTTTACTTTTCTATAATGCTTTATTCATGATACTTCCTTTAACAGTGTTATGGTGGTATTCCGGTGAGATAGAAAAGACATTTGCATTTTACAAATGGTTAGATATCACTTTCCTTACATCATTTCTTATGTCATGTTTCATGGGATTTGTATTGATGTATTCAACAGTTTTGTGTACAGCTTATAATTCTGCATTAACAACTACAATTGTTGGAGTCATCAAAAATATTTTGGTTACTTATATAGGAATG…	MVGGAIIAAADDLSFEVRGYLFVLCNDFFTAANNICVKKKLDARDLGKYGLLFYNALFMILPLTVLWWYSGEIEKTFAFYKWLDITFLTSFLMSCFMGFVLMYSTVLCTAYNSALTTTIVGVIKNILVTYIGMYLGGDYIFSWTNFLGLNISMAGSLVYSYITFVHKETPSAKLTTTAKKG*	ABC-2_family_transporter_protein|PF12679.5;Triose-phosphate_Transporter_family|PF03151.14	NP_001003877.1	235.3	205
TRINITY_DN14935_c0_g1_i1	type:5prime_partial	531	TTAGCTCAAAATGGAGATTCAAGAGTTGATAATTATGCTACAGCAATGCAATTCTTAGTTGCAACTTTCATGAATTCCGATCGCTTTTACCTTTTCGATGGTTGGTTCAATTGGATTATCTACCCTTTAGATTTATTTACTCACGAAACACTAGATTTTATAGAAATCAATGATCCTACAATTATCGTTAATTCCTTGCATACATGGAGGCGAGTATATGAAGATAACTTTACCCTTTTCTCTTGCACTCAGGATGATATTGATGCTTACGTAAAAGAACAAACACACGGAAAAAGACTCCCTAACGTATTCAAGCAACTAATGAGCCGCGTGATTTGTGAATCCTTCAATCAATTTAGTCTTCTTAAATCCATAGTTTCGCCTTACTATTATGAACTT…	LAQNGDSRVDNYATAMQFLVATFMNSDRFYLFDGWFNWIIYPLDLFTHETLDFIEINDPTIIVNSLHTWRRVYEDNFTLFSCTQDDIDAYVKEQTHGKRLPNVFKQLMSRVICESFNQFSLLKSIVSPYYYELPHQDEEEYETFTEDPNWCFKRSSTRYMIFSFDSRLKLGIKNAA*	NA	NA	NA	258
TRINITY_DN1493_c0_g1_i1	type:internal	369	GTTGGTTGTTATAATCAAACTGTTATGTCAAAACGCCAAAGAGAAGTCATGATGCTTGCCAGTGCCAAACAAAATTTACAAAGAATGGCATTCTTTGGTTTGTGTGAGTATCAGAAACTAACTCAATACTTATTTGAGAATACTTTCCATCTGAAATTTCTTCAACCATTTCAGCAATTCAATGAAACACGAAGTAGCCTCACATTATCCGAAATTAGTGATGATGAGCTACAGAAGATAAAAGATTTAAATAGACTTGATATAGAATTATATCAATTTGCAAAATCATTACTTTTTCAAAGATACAGTCTTTTAAATAATTCAAAAAATATTTTTGAAACTGACAGGAAAAAGCATATAATTGACAAG	VGCYNQTVMSKRQREVMMLASAKQNLQRMAFFGLCEYQKLTQYLFENTFHLKFLQPFQQFNETRSSLTLSEISDDELQKIKDLNRLDIELYQFAKSLLFQRYSLLNNSKNIFETDRKKHIIDK	Sulfotransferase_family|PF03567.12	XP_970861.1	122.5	307
TRINITY_DN14944_c0_g2_i1	type:5prime_partial	510	TTTATAGTTTTACTTAGAAGTATTCAAGATTTTGAACTTTTTGTGTATGAAAGGTTTTGGCTTCGATTTGCAAATAAACCTTTCACTCTGGATGATTTTGAAGATTATGAGAAGCATTTTACTGTTATGAATTATAATGATTTTCCTCTACAACAAATGTTTTGTCATGACTTCATTAAACAATTTGAAGATTATTATCCATCTTATAAATGGAGTGACGTTGAAAATAGTATTTATAAAATGATAAAAGACATTTTTATCGCATCAGCATTGAGCGAACCACCTTCTGGCATTGGAAGTTATCCTGGCTCTAGAGCCATGTATGGCTTAGATATCATGTTGGAATGGGATCGAAGTCATGATGAACCAACTATTAATCCTGTGATATTAGAAGTGAAC…	FIVLLRSIQDFELFVYERFWLRFANKPFTLDDFEDYEKHFTVMNYNDFPLQQMFCHDFIKQFEDYYPSYKWSDVENSIYKMIKDIFIASALSEPPSGIGSYPGSRAMYGLDIMLEWDRSHDEPTINPVILEVNWMPDCKRACDYYPEFYNDVFSVLFLNDINGKHVVQL*	Tubulin-tyrosine_ligase_family|PF03133.13;Bacteriophage_abortive_infection_AbiH|PF14253.4	NP_898838.2	195.7	811
TRINITY_DN14950_c0_g1_i1	type:internal	300	AAGTCATTGGAAGATATGCTGTCTTCCGAAGTGGATGAGTCAGCTGTTACTGCTCTCGTTGGCTCTCTAGAATCCCAACTAGCATCGTCAAATATTCAGTTATCTAGTCAAGATGTAAATACTACGTCAGTGACTGTAAATCATGTCAATAATGCAGTTCTAGTTGATAACAATATTACTCGATTGCTTGACGGACCAAAACAAGGGGTCATTACTGTTAGTCAGGCTGTTTCTTTAATCAATGTAGCTAAACCAGCTGTTGTTTCTTCCCAGATCGGAGACACAAATGCTTCTCCTGCA	KSLEDMLSSEVDESAVTALVGSLESQLASSNIQLSSQDVNTTSVTVNHVNNAVLVDNNITRLLDGPKQGVITVSQAVSLINVAKPAVVSSQIGDTNASPA	NA	NA	NA	62
TRINITY_DN14951_c0_g2_i1	type:internal	648	GTAAAAGTTAAGAATGATGATGATTTTGTTTCTACATCTGACTCAAAGAACAAAAATGATGATTCAGATATCTTTTTTGCAGAAACAAATCAATCAAGTCATGATAATCCTTCATTTCAAATTTCAGAAGTTAATGAACAAAATGAAGCAACTGAATTCAATCAGGAAATATTTGAACGTTCTTCAGATACCAGTAAAAATTCTAAAGGACCCCAACTATTGAGTTTTAGTTCTGAACAATTATTTACAGATATACCTAACAAATCCAACCCTGATACAGAGGACAATATACCTGTCAATGAAACAAAAAATATTCCTGATGAACATGATCCTTTGCCTGTAGATGATGTTCCAGTTAGTGAGCCTATAAAAGAGCCTTACACTTTTAATCCTGAAGAA…	VKVKNDDDFVSTSDSKNKNDDSDIFFAETNQSSHDNPSFQISEVNEQNEATEFNQEIFERSSDTSKNSKGPQLLSFSSEQLFTDIPNKSNPDTEDNIPVNETKNIPDEHDPLPVDDVPVSEPIKEPYTFNPEEFDISFKDEQINRDDKNNESFNEGQLVIEDTLDMKQRPTDVESVCSDTTDITIPETKNETETSHVVSSEEPLHEECQVEDTSIA	NA	NA	NA	378
TRINITY_DN14973_c0_g1_i1	type:internal	861	TGTTTGAAAAGTAAAGGAAAGAAAAGAAAAGATAATAAATTCACTTCAAAACGGTTACCCCAGACAAAGTTAGGACAGTATATTGAAAATCGTATTAACAACTTTTTAAAGAGAAGAGAATGTGGAGCTGGTGATGTTACAATTAGAGTTGTCTCAAGCTCAGAAAAGTATTCTGAAGTGAAACCTGAAATGAAAGCACGATTTGTTGAAACTGGAGAATTGCCAGAACGTTTTCCTTATAGAGCTAAAGCTCTTTTTGCCTTTGAAGAAATTGATGGTGTTGATACCTGCTTTTTTGGTATGCATGTCCAAGAATATGGCTCTGATTGTGCTCTTCCAAATTCTAGACGTGTGTACATTGCTTATTTGGACAGTGTCCATTTTTTCCAACCAAGGCAG…	CLKSKGKKRKDNKFTSKRLPQTKLGQYIENRINNFLKRRECGAGDVTIRVVSSSEKYSEVKPEMKARFVETGELPERFPYRAKALFAFEEIDGVDTCFFGMHVQEYGSDCALPNSRRVYIAYLDSVHFFQPRQLRTPVYHEILLSYLDYVKQLGYTMAHIWACPPSEGDDYIFHCHPPDQKIPKPKRLQDWYKKMLDKGIVDRVIVDYKDILRQATEDNLTSAAELPYFDDDFWPNVLEESIKEEQDEEQKRKAEASAAEAAARVVATASDVNENEEDSVNGKKKGQ	Histone_acetylation_protein|PF08214.9	XP_001076610.1	408.3	343
TRINITY_DN14988_c0_g1_i1	type:internal	435	AAAGACAGTAAAAGTAGATCTCTTCACCAAACAATGAAAACTACTTTAGATACTGATGTCAAATTCTCAGAAGGACGATGCACTAAAGTTTTGCCTTTGGCATCTGCAGCTTATCAAGATAATTTGCCAACTCATTACACAGAGGATTATCATCAAAATAGGTTAGCTCATGCCTTGCATGTGTTCAGTATGCATGCTCGGGGGCCAGCTGTCCAAAGATATGCTAAACAACTAAAAGAAGACTGTGAAAGATTATGGAAAAATGGACATCAGATGTGTGAAGTCCTGAGTTTGACTGGAAATCATTGTATGAACCCTATTCATCGCACTGATACAGATAATGTTGAAGAAAAATCTTTGCCCATAATGTCACATTGCAGTCAAATTAAGATAGTATCT…	KDSKSRSLHQTMKTTLDTDVKFSEGRCTKVLPLASAAYQDNLPTHYTEDYHQNRLAHALHVFSMHARGPAVQRYAKQLKEDCERLWKNGHQMCEVLSLTGNHCMNPIHRTDTDNVEEKSLPIMSHCSQIKIVSTCDCGSKQATRD	Smg8_Smg9|PF10220.7;Domain_of_unknown_function_(DUF4801)|PF16059.3	XP_695811.2	125.6	285
TRINITY_DN15007_c0_g1_i1	type:complete	402	ATGCATAAGATAACCTTAGCGATTGCAGCGCTCTGCTTTTTATTCACACTGGTGTCCTGTAGTTACAGAGAAAGAAGAAGTGGTATTTCTGATCAAAGACTAGCTGAATTAGAGACACTGCTGGCACTGGCAAAACATGGGGGAGGAAATAAAGATGTTGCCTATGGAGTAATCGATCCTATCATGTTGGGCAAGAGGAAGAGGAGCTACGACATGGATCTCTCAAATCAAGTGGAAGAAGATTTCCCCCTGGATATCTTGCGCGAGGCCAGGCTGAAGTATCCTTCCAATAGACGCGAACCTGTCATGTATTCGCACCGATTTCCAGAGAGACTTTTCAGATTCAGAGCGAATGAGTTGGAAAACAGGGATTTGCAAGGCAACGAGGAGGTCGCCAAG…	MHKITLAIAALCFLFTLVSCSYRERRSGISDQRLAELETLLALAKHGGGNKDVAYGVIDPIMLGKRKRSYDMDLSNQVEEDFPLDILREARLKYPSNRREPVMYSHRFPERLFRFRANELENRDLQGNEEVAK*	NA	NA	NA	31973
TRINITY_DN15016_c0_g1_i1	type:5prime_partial	534	TCCGATCTAATCAACATCGATATTAAAGTGAACAATGATACTCTTATTACTAAAGTTAATGAACTTATTAAAGAATACAATCGGGAAAATCTCACTGTTTGGGGAAATTTCAGCAATGATGTTACTAAGAAGTGTTATAATTTGAATCCACAAATTCCTATTTATTTTTCTGCTAAAAGGGTTTTATTTCTTGTATTTCTCACTTACAATGGATTGTTGCCTTTCATACCTTTGAGAGAATCATGCCTAGAATTACTTATGCCATCCGTTATTCTTAAAAATCCTAGCATGATGATTTCACGTGATAAATTTTGGAGCCCGTACATAGTGTGGCTGATAGATAAGTTACTTATGAGGAAAGCTTTATTTGAACATCTTTCTAAACGAGGTATACAGACC…	SDLINIDIKVNNDTLITKVNELIKEYNRENLTVWGNFSNDVTKKCYNLNPQIPIYFSAKRVLFLVFLTYNGLLPFIPLRESCLELLMPSVILKNPSMMISRDKFWSPYIVWLIDKLLMRKALFEHLSKRGIQTYFWVLNDEEDFERAFKLGATGIMTDYPTKLRKFLDKKAVNNKSK*	Glycerophosphoryl_diester_phosphodiesterase_family|PF13653.4;Glycerophosphoryl_diester_phosphodiesterase_family|PF03009.15	BAC04419.1	204.9	72
TRINITY_DN15019_c0_g1_i1	type:5prime_partial	309	GCAAACTTAAGATCTTGTAACATGGAAGATCCAGCAGGAAATAGAGCAAACATTGAAGGTGTTAATTTGAAAGGTGCTAATTTAGAAGGCAGTCAGATGGCTGGTGTTAATCTTCGTGTAGCCACACTTAAAAGGGCGAATTTGCAAAACTGTGATCTTCGAGGGGCTGTTCTAGCTGGTGCAGATTTAGAGAACTGTGATCTTTCTGGAAGTGACCTCCACGAAGCTAATCTCCGAGGGGCAAATTTGAAGGATACAGCATTCGATCTTATGCTCACACCTCTTCATATGTCTCAAGCTATAAGATGA	ANLRSCNMEDPAGNRANIEGVNLKGANLEGSQMAGVNLRVATLKRANLQNCDLRGAVLAGADLENCDLSGSDLHEANLRGANLKDTAFDLMLTPLHMSQAIR*	NAD-dependent_DNA_ligase_OB-fold_domain|PF03120.14;Pentapeptide_repeats_(8_copies)|PF00805.20;Pentapeptide_repeats_(9_copies)|PF13576.4;Pentapeptide_repeats_(9_copies)|PF13599.4	XP_001651968.1	158.3	216
TRINITY_DN15024_c0_g1_i1	type:internal	318	ACGGAGCCCCGGACTGCAGGTTTCGTCGCGTCGGTTACCCCGGACGCGGTAGCATCAAGACTAGGAATCAATATTGCACTGTCCATGGAAGATGGGGTTGCCAGAGCCTCCAGGAGGTTAGACTTCTACCTGTTGGTCCGCGCGGAAGGTATTTTATTTCCCTTCTACCACCAGTGGAAACCACTGAAAGCGTTCCCCTATTCGCCATCTGGGGACGCGCTCTCTAGGGGTTGCAGACTCCCCCGAGAGTGTATATCATTGTCACACTTTAATGAATTGAGACAAAAAGTTTACAAAAAGATGTCCGAGGAACATTTT	TEPRTAGFVASVTPDAVASRLGINIALSMEDGVARASRRLDFYLLVRAEGILFPFYHQWKPLKAFPYSPSGDALSRGCRLPRECISLSHFNELRQKVYKKMSEEHF	NA	NA	NA	203
TRINITY_DN15029_c0_g1_i1	type:internal	462	TTGCCCGATGAATACTTGTGTATAAAAGATTCTTGGAAACCGGAGTGGAATGAAAAAGGTGTGCAAGTACCAGTACGCTATGCAATGCCAGAATTGAATGTTCGAGAGATAAGGAAAAGAAGTAAAAGTGGATCTTTTAAAATCCCACAGAAGCTATTCCATTTGAATTATGATGAAAAATTTAATTCCCAATACCATACAATTAGTAATATACATATAGTTTCTGATGAGAGAACTTGCTACTATGATTTGGATGTTACTGATATGCATTGGCTAAAAAAAGTCAATCAAGAAAGAGAAGATGCAGGTATTGACCCTTTGGATGATTCATTTGTGGAGCTTGTATTTGAAAGTCTTGAGCAACAGGTGCACATAAGATTACAAGAAGAAATAAAAAAT…	LPDEYLCIKDSWKPEWNEKGVQVPVRYAMPELNVREIRKRSKSGSFKIPQKLFHLNYDEKFNSQYHTISNIHIVSDERTCYYDLDVTDMHWLKKVNQEREDAGIDPLDDSFVELVFESLEQQVHIRLQEEIKNDKTLGIDYDEDAICDVCRSGR	Enhancer_of_polycomb-like|PF10513.7	XP_001649902.1	121.3	172
TRINITY_DN15044_c0_g2_i1	type:5prime_partial	453	TTCGATATTGATAAAAATGGTGTAATTACCTTCAAAGAATTCATTCTTGCCATTTCTATCACAACACGAGGAACAGTGGAAGAGAAACTGAATTGGGCCTTCAGCTTGTACGACTTCGACAGCGATGGTTACGTATCCCGGGACGAAATGCTGGACATCGTCCGAGCAATCCACAGGATGCACGGCAAAGACGGGGACACGTCGGAAAGAGACGCCGCACACAAGAGGGTCGACGAGCTCTTCACCAAACTCGATACGGATAGAGATGGCAAATTAAGCCGCGAAGAATTCTGCAAAGGATTCAAGAACGACGCTTGGATCATCAAGGCCTTGCTGATGAAATCCCCTGTGGTTAGTGCTTCCAGCACTTCCCTGAACACCACCGGTGGAGACAACGAA…	FDIDKNGVITFKEFILAISITTRGTVEEKLNWAFSLYDFDSDGYVSRDEMLDIVRAIHRMHGKDGDTSERDAAHKRVDELFTKLDTDRDGKLSREEFCKGFKNDAWIIKALLMKSPVVSASSTSLNTTGGDNEVPRRTSTCQASVGNGLH*	Secreted_protein_acidic_and_rich_in_cysteine_Ca_binding_region|PF10591.7;Cytoskeletal-regulatory_complex_EF_hand|PF12763.5;EF-hand_domain_pair|PF13833.4;EF_hand|PF00036.30;EF-hand_domain|PF14658.4;EF-hand_domain_pair|PF13499.4;EF-hand_domain|PF13405.4;EF_hand|PF13202.4	NP_508201.2	123.6	202
TRINITY_DN15048_c0_g1_i1	type:internal	369	TATCCAGGTGGTCAAAATCCTCAATATCCTGGTGGTCAAAATCCGCAAAATCCGGATGGACAAAATCCTCAGTATCCAGGTGACCAAAATCCTCAGTATCCAAGTGGACAGAATCCTCAATATCCTAGTGGTGAAAATCCTCAATATCCTAGTGGCGAAAATCCTCAGTATCCAGGCGGCCAAAATCCTCAGTATCCAGGTGGTCAAAATCCTCAGTATCCAAATGCCCAAAATCCTCAGTATCCAGATGGCCAAAATCCTCAGTATCCAGATGAGCAAAATCCTCAGTATCCAGGAGGTCAAAATCCTCAGTATCCAGGAGGTCAAAATCCTCAGTATCCAGGAGGTCAAAATCCTCAGTATCCAGGA	YPGGQNPQYPGGQNPQNPDGQNPQYPGDQNPQYPSGQNPQYPSGENPQYPSGENPQYPGGQNPQYPGGQNPQYPNAQNPQYPDGQNPQYPDEQNPQYPGGQNPQYPGGQNPQYPGGQNPQYPG	Crustacean_cuticle_protein_repeat|PF08140.9;Bacteriophage_FRD3_protein|PF05798.9;Domain_of_unknown_function_(DUF3432)|PF11914.6	WP_009785581.1	94.4	1190
TRINITY_DN15049_c0_g1_i1	type:5prime_partial	915	AATCGGTATAGGATTCTATGCTCTCTTGTTTTCGTTTTTTTTATATGCTTAGTGTTTCAATCTCATAGCTCTAAATTGCATGTTAAACTGAAGAATTTTATTGCTGGAGATATTGTGGATTTTACAGGTGCTGATAATGTGACTGGATTTAGTTATGCGATAGTGCCTAATGTAGTGCATTACGTTCATTTTGATAGTATGGATCTGAGTTTTATTCAGGTAATTAGTATTAAAGCTGTTTTTCTCAATCACAAACCAGAAAAAATCCTGATTCACTGCAATCACCATAGATTAAGTGGGAAGTACTGGAACATGGTGAAAAACATTTCTGTTTTGGAAATATCTTTTATGAAAAAGCCAACTCATATTTTTGGAAAATTATTGAGTTCTATATATCAT…	NRYRILCSLVFVFFICLVFQSHSSKLHVKLKNFIAGDIVDFTGADNVTGFSYAIVPNVVHYVHFDSMDLSFIQVISIKAVFLNHKPEKILIHCNHHRLSGKYWNMVKNISVLEISFMKKPTHIFGKLLSSIYHSSDIARLEILMKHGGIFLDTDTYVIKSLNYFRKFEMTLGWPPSQNLGTQLLIAHKNARFLKLWYNSYRYYRRERWYYNAGELPTQFILEPMPYLVHRVPYDFGVHNLVHLLYGTHSDEWKNYHAIHLLVRHKNYLLPGDTVEEFNENNINQYNKTFGDMARLVLYGSTNII*	TcdA/TcdB_catalytic_glycosyltransferase_domain|PF12919.5;Glycosyltransferase_sugar-binding_region_containing_DXD_motif|PF04488.13;Capsular_polysaccharide_synthesis_protein|PF05704.10	NA	NA	855
TRINITY_DN15050_c0_g1_i1	type:internal	588	AAACTAGTTGTACTCGAGGTTCCTGGTCCCCCAAGCGATGTTCGCGTGGAGCAGACTTGGAGTCAAAGTGCTACTGTTCGATGGAACGTTCCTTATGGTGGGAACAGTCCCATCACTTTCTTCGTCGTACAGTACTGGAGAGATGCAGGTGCTCCTCATAGGTTAGAAGAAGAGAAGGTATCGGCTTCACAGACGTTCACTATGCTCAAGGACCTTCAGCCAGGGACTTCCTACGTGGTGCGGGTGTTGGCAGAAAACGAAGTGGGAAGAGGAAATCCCTCTGAATCTCAGCAGTTCCTTACAAAAGAAGCGGAACCTTCAGCTCCGCCTTTTGATGTTACAGTAGAATCTCGAGGCGCTGGTACTTTAAGAGTGAAATGGAAGACACCACCGCGGGAC…	KLVVLEVPGPPSDVRVEQTWSQSATVRWNVPYGGNSPITFFVVQYWRDAGAPHRLEEEKVSASQTFTMLKDLQPGTSYVVRVLAENEVGRGNPSESQQFLTKEAEPSAPPFDVTVESRGAGTLRVKWKTPPRDQWNGQLKGYYIGYQVASSKEPYSFKTVEFSKQGEEEYRLTNLQRSTEYRVIVQAFNSAGSGPP	Interferon-alpha/beta_receptor,_fibronectin_type_III|PF09294.8;PKD_domain|PF00801.18;Fibronectin_type_III_domain|PF00041.19;Purple_acid_Phosphatase,_N-terminal_domain|PF16656.3	NP_001107841.1	38.9	109
TRINITY_DN15055_c0_g2_i1	type:5prime_partial	732	GTGAAGTGGATCAGCAAGCAACAAAACTCCCACGGGGGCTTCTCCTCCACTCAGGATACAGTGGTGGCTCTCCAAGCCCTCTCCAAATATGGAGCTGCCACTTTTACGAGAAGTCAGAAAGAAGTGTTGGTCACCATCGAGTCTTCAGGGACCTTCTCTAAGACTTTCCATGTTAACAGTGGCAATCGCCTGCTGCTGCAGGAAGTCAGGCTGCCAGATCTGCCCGGAAATTACGTCACCAAAGGGTCAGGATCAGGATGTGTGTACCTTCAGACATCTCTAAAGTACAACATCCTCCCAGTGGCAGATGGAAAAGCACCCTTCGCTCTGCAAGTCAACACTCTCCCCCTAAACTTTGACAAGGCAGGAGATCACAGAACATTCCAGATTCGCATCAAC…	VKWISKQQNSHGGFSSTQDTVVALQALSKYGAATFTRSQKEVLVTIESSGTFSKTFHVNSGNRLLLQEVRLPDLPGNYVTKGSGSGCVYLQTSLKYNILPVADGKAPFALQVNTLPLNFDKAGDHRTFQIRINVSYTGERPSSNMVIVDVKMVSGFIPMKPSVKKLQDQPNIQRTEVNTNHVLIYIEKLTNQTLGFSFAVEQDIPVKNLKPAPIKVYDYYETDEFTVEEYSAPFSDGSEQGNA*	A-macroglobulin_complement_component|PF07678.12;A-macroglobulin_receptor|PF07677.12	NP_031402.3	485.7	169
TRINITY_DN15060_c0_g2_i1	type:internal	417	GATAATAATCATTCAACTGAAAATACAGATTCGTTACGCTCTAAAAGTGAAAGTAGTGACCAGATTGATATCAATAATACAGACGGTGATCTTAGAACTAAAACTCTTAATAGTGTTATATGTGATTCAAATGTGGATACATCCAAAAAACCAGTTTGCGATGACGGAATACATTGTGGCACAGATGATGAAACTGAGGTGATATCAAAAACTGATAATGTATGCAAAGATAGAATTCTTAGTCGAACAGATGACGATCAAATTACTGAAAAAGTAAAAAAGTGTGATGATGGTATACACTGTGGAACAGATGATGAAGGTGAGATGCTGAAGAATTCTAATAAAGTGTGTGAAGATGGAATGCATTGTGGCACTGATGATGAAGAGGAAGTGGCAAAA…	DNNHSTENTDSLRSKSESSDQIDINNTDGDLRTKTLNSVICDSNVDTSKKPVCDDGIHCGTDDETEVISKTDNVCKDRILSRTDDDQITEKVKKCDDGIHCGTDDEGEMLKNSNKVCEDGMHCGTDDEEEVAKKSSKKV	Granulin|PF00396.16	NA	NA	212
TRINITY_DN15064_c0_g1_i1	type:internal	363	CCTACATTTAGTAATCTACAGCCAGTCAAAAATGTACCAGTAGTTCAACAATCTCAGCAAGAACAAGAAGAAACTCCAGTTACCTTTTCAGGTATAGTCGAAGCAGTCGAAGCTGAAGAAGAATCCACCGCATCTACATTACACACAACAGTAACAGTAGACTTTGACGCCGATAATGAAGAAGAAACGACAGAACCAACAACGACCATAAGCACTACTACTGAAGAGGCAACGACCACCTGTCCTGCTCCCATATGTTCAGGTTTGAGGTGTAGCATGGAAATGGGAGAAGATGGCTGTGAAGTATGCAAATGTAAATACAAGTGTCCCAAGCCCAAGTGTGTTGGTAATTGTTATCCTGAG	PTFSNLQPVKNVPVVQQSQQEQEETPVTFSGIVEAVEAEEESTASTLHTTVTVDFDADNEEETTEPTTTISTTTEEATTTCPAPICSGLRCSMEMGEDGCEVCKCKYKCPKPKCVGNCYPE	Dictyostelium_(Slime_Mold)_REP_protein|PF05086.10	NA	NA	74
TRINITY_DN15071_c0_g1_i1	type:5prime_partial	351	GCCACATTTGGTTGCCATGAGACATACAAGCTGGACGGCCCAGAAGAAGCGGAATGTACCAAGACGGGAACTTGGTCCTTCTTGCCGACCTGTAGAGAGTCTTGCAAACTCCCCGTTAAGAAAGCCACCGTGCTGTACCAAGGGATGAGGGTGAAGATCCAGGAACAGTTTAAGAATGGGATGATGCATGGCGACAAAATTCACTTCTACTGCAAAAACAAAGAGAAGAAGTGCAGCTACACTGTGGAGGCTCATTGCAGAGATGGCACTATCGAGATTCCCTCGTGCTTCAAGGAGCACAGTTCTCTGGCTTTCTGGAAAACGGATGCATCAGAACTGACACCGTGCTGA	ATFGCHETYKLDGPEEAECTKTGTWSFLPTCRESCKLPVKKATVLYQGMRVKIQEQFKNGMMHGDKIHFYCKNKEKKCSYTVEAHCRDGTIEIPSCFKEHSSLAFWKTDASELTPC*	Beta-2-glycoprotein-1_fifth_domain|PF09014.8;Eukaryotic_protein_of_unknown_function_(DUF842)|PF05811.11;Sushi_repeat_(SCR_repeat)|PF00084.18	BAB27271.1	256.1	90
TRINITY_DN15079_c0_g1_i1	type:5prime_partial	375	AATAAAAGGTTGCATAATAATCTTACTAAATCAGTCATTGCATTTAATTCTGAGAAATCTCTGCAAGAGATTATAGAGGCATCTAAAAAGTTATTGGAAGATCTTGTAGAAACTATCGTTACAAAGGAATCTAATGAAAAGTGTTTGAGAAAGATTAATGAAGACTTACTTGACAATCTTATTGAAAGGGTTGTCTCTAAGGAATCTGAAGAAAAATATCTGCAGGAAGCAATTAAAGAGTTACTCAAAAATCTTATTGAATCCACTGTCTCAAAAGAGTCTGAAGAAAGATGTTTGCTAGAAGTAAATAAAGAGTTATCAAAAATCTTATTGAATCCACTGTCTCAAAAGAGTCTGAAGAAAGATGTTTGCTAG	NKRLHNNLTKSVIAFNSEKSLQEIIEASKKLLEDLVETIVTKESNEKCLRKINEDLLDNLIERVVSKESEEKYLQEAIKELLKNLIESTVSKESEERCLLEVNKELSKILLNPLSQKSLKKDVC*	Domain_of_unknown_function_(DUF1476)|PF07345.9;Protein_of_unknown_function_(DUF445)|PF04286.10;Site-specific_recombinase|PF10136.7;Condensin_II_non_structural_maintenance_of_chromosomes_subunit|PF12422.6;LMBR1-like_membrane_protein|PF04791.14;Putative_helicase|PF07514.9;PXA_domain|PF02194.13;Domain_of_unknown_function_(DUF758)|PF05527.9;Uncharacterised_protein_family_(UPF0270)|PF06794.10;Protein_…	NA	NA	146
TRINITY_DN15080_c0_g2_i1	type:internal	567	AAGATGATTCTGCATCATTCTTGGGATAGGTGTTTGTTAGGTATTTTCCTATTCACTTCTGTAACTATTATCCAAGCTCAAGTTACAACATGGAACGTCAGAAACAGTAATCCAGCACCTCTAACTCGAGGATATTATCTTGCCGGTGGTGCAAGCAGTCTACCAGTTCTCCAACCATATGTAGGAAGCCAAAGAGACCAAGATGTTCGCTCAGTCTATGGACCTCATTTGTCACAAGAATGTCGAATTAAATACGAAATTTTAGATCCTCGAAACATAGAATCAACCAGGCAAGAAATAACAAAATGTAGTGATCAGAATATACACTGTTACTACTCAGAATACAGCAAGTACAGAACTATTGATGGATCTTGCAACAATCTTAAAAATCCCTCGTGG…	KMILHHSWDRCLLGIFLFTSVTIIQAQVTTWNVRNSNPAPLTRGYYLAGGASSLPVLQPYVGSQRDQDVRSVYGPHLSQECRIKYEILDPRNIESTRQEITKCSDQNIHCYYSEYSKYRTIDGSCNNLKNPSWGKSDNCLRRVLPFDYGDKKSFPRESCTGNALPNPRLISNVFHKELKPKPNHLTTHF	Animal_haem_peroxidase|PF03098.13	XP_001657503.1	68.9	148
TRINITY_DN15094_c0_g1_i1	type:internal	546	TCAGATGTATATTCTGCATATAATAGTCTGTCTGTGCCTCATGTAGAGCTTTTAGAAACGGATCCTTGTACATCCAAACGGGGTAAAAAGAAGAAATTTGGCAAAGTCAAATTAGAAAATGAACTTTCGTATGAATTGGAAAGAAGTGCTCGAAGATGGGAGCAGAAACAAGTACAGATAAAAACTTTAGAAGGTGAATTTTCAGTGACTATGTGGGCGTCAGGAACGGATGAAGATGAAGTTACAACACCTGAACCTGATCCTGATTATACAGAATACATGACTGGGAAAAAAATTCCTGCCGCAGGCTTACCTGGAGTTGACCTTAGTGACCCTAAACAGTTAGCTGAATTTGCCAAAATGAAACCTCGAAAGTTGTCAGATGACTTAACCAGGACA…	SDVYSAYNSLSVPHVELLETDPCTSKRGKKKKFGKVKLENELSYELERSARRWEQKQVQIKTLEGEFSVTMWASGTDEDEVTTPEPDPDYTEYMTGKKIPAAGLPGVDLSDPKQLAEFAKMKPRKLSDDLTRTIACPHKGCIKMFRDNSAMRKHLHTHGPRVHVCAECGKAFVESSKLKRHQ	IBR_domain,_a_half_RING-finger_domain|PF01485.19;Zinc-finger_double_domain|PF13465.4;Zinc-finger_double-stranded_RNA-binding|PF12171.6;Zinc_finger,_C2H2_type|PF00096.24;CGNR_zinc_finger|PF11706.6;zinc-ribbon|PF14369.4;Transposase-associated_domain|PF13963.4;C2H2-type_zinc_finger|PF13894.4	NP_001164362.1	229.6	220
TRINITY_DN150_c0_g1_i1	type:internal	456	GAAGAAGAAGAACGGAAGAAGCGTCTTCAGCTGTACGTGTTTGTTTTGCGCTGTATAGCATATCCTTTTAATGCGAAACAGCCTACAGATATGGTTCGTAGAAATTTAAAAGTCACGAAGCAGCAGCTGGAAACTATTCAGGGACGTTTCCAAGCGTTCTTCAAAGGGGAGACAAGTATTGCAGCAGATGAGGCCTTTAACAATGCAGTACAAAACTACTATGAAGTTTTCTTAAAGAGTGATCGAGTTGCAAGAATGGTCCAGAGTGGCGCTTGTTCCCAGCAAGACTTTCGAGATGTTTTCAAGATTAATATAGAGAAGAGGGTTCGCAGCTTACCCGAAATCAATGGCCTTAGCAAAGAAACTGTTCTCACCGCATGGTTGAATAAATTCGATGCA…	EEEERKKRLQLYVFVLRCIAYPFNAKQPTDMVRRNLKVTKQQLETIQGRFQAFFKGETSIAADEAFNNAVQNYYEVFLKSDRVARMVQSGACSQQDFRDVFKINIEKRVRSLPEINGLSKETVLTAWLNKFDAIFRGDEDTRKPQSRLQQNV	NA	NP_001069488.1	235	94
TRINITY_DN15107_c0_g1_i1	type:internal	321	AATTGTACCAGAAGCTCTTCTCTTGTTCTGCGTTCTTTCTCAAAGTTTGCTCATAAAGTTATTGTTGAAGGATGTGAAGATGTCGAAGTTCAGCTTGGAGCATTTTTACACATGGAAATAGATTATATGGAATTCAAAAACATTAACAAACTTATTCTGCGTCCATTTGCCTTTTCCGGTATCAAAAGAATTCGCAGATTCCTTATGAAAAACATAGCCGATTTAGAAATAAATTTATTTGGCTTGAGTGGACTTCACAGAGTTGACAAAGCTTCTTTCATGAATGTAACAGCACTCAATCTATCCGAATTTGCTATTGCT	NCTRSSSLVLRSFSKFAHKVIVEGCEDVEVQLGAFLHMEIDYMEFKNINKLILRPFAFSGIKRIRRFLMKNIADLEINLFGLSGLHRVDKASFMNVTALNLSEFAIA	NA	NA	NA	82
TRINITY_DN1510_c0_g1_i1	type:3prime_partial	447	ATGGAATCGCTGAATTGGACAATTAAAAACACTCTTCAATTTGTATCTGTTATTCAAGATGTTTGTGACAAAAAGAGGTTATATATTGAGTCACTGAGGTTGCATGAGTACAATAAACAGGTGAAAGAATGGAAACAAAAAAATTATGTTAAACCGGCTCAAAAGGAATCAAAACTTCTGTGCAGTAAAAAAGAACCAGCAACTGCTATATCAATTACAGAAGAAATAGAAGAACTTGCTTTAGTTGATGTTTTATTAGAAAAGGCTAAAAGTATTAGGATGAAAAACAAGGATTTAACTAAGGAAACTAAAAAAAGTGTGATTAAATCTCAGTCCTCTACAGAAACAACTACTAATGTATCCAAATCAAATAAAGGGGAATTACAATTCAAGAAAAGA…	MESLNWTIKNTLQFVSVIQDVCDKKRLYIESLRLHEYNKQVKEWKQKNYVKPAQKESKLLCSKKEPATAISITEEIEELALVDVLLEKAKSIRMKNKDLTKETKKSVIKSQSSTETTTNVSKSNKGELQFKKRLCNNLKDLNGDKKVVP	NA	NA	NA	210
TRINITY_DN15117_c0_g1_i1	type:5prime_partial	411	CCAATTTCTTCTAGTACTCCTATAGGTCAGCAATTAATTGACGTTGTATGTAAAAGTGACATAAAAGCAGTAGCTTTAGTACTGGCTCATGCATCTCCGGAACATGTTAATACAACTGTTAGTCCAAGAGACCAGAGAACTGCTCTTCACCTTGCAGCTGCATTGGGAAGTTTGCCAATTACTCAGCTTCTCATATGGAATCATGCTAATGTAAAAACTGTGGATTCGGATGGTAGAACTGCACTTACATATGCAAAGAATGGTGGTTTTCAAGATGTCCATGATTTACTTGTCCATAGTGGCTGCCCAGACTTGAATCCTGCACCTACCTCTACCCTTCCTCGTAGACGAGGTAGCTTATCCAAAAAGTCAACTGAGGTATTCGATAAACTGCCTGCC…	PISSSTPIGQQLIDVVCKSDIKAVALVLAHASPEHVNTTVSPRDQRTALHLAAALGSLPITQLLIWNHANVKTVDSDGRTALTYAKNGGFQDVHDLLVHSGCPDLNPAPTSTLPRRRGSLSKKSTEVFDKLPASII*	Ankyrin_repeat|PF13606.4;Ankyrin_repeats_(many_copies)|PF13637.4;Ankyrin_repeat|PF00023.28;Ankyrin_repeats_(3_copies)|PF12796.5;Ankyrin_repeats_(many_copies)|PF13857.4	XP_001662044.1	107.1	99
TRINITY_DN15126_c0_g1_i1	type:internal	414	GGAGTGACTGTCATCGTCCTCGTCGTCCTCGCCGGCGTAGAAGCGATCGCAGCTGTTGGTGGGGGACCCTTCTTCGCACGGCGCCTCGGGCAGCCCCAGGGTGTGCGTCAGGGTGTGCCTCCTGAGGTCGCAGTTCCTCCTGAACACCTTGCCACAGGAGTCGCAGTTGTAGGGCTTGATGTCGGTGTGCGTCAGGAGGTGCGTTTTGAGGTTACTGCGCTGGTTGAAAGTGCGACCGCACGTAGGGCACTTGTGCGGGGAGTCCTCCATGTGGAGGATGCGGTGCACTGCCAATGTCCTGGACTGGCAAAAACCCTTTCCGCACTCCGAGCACTTGAAAGGCTTCTCCTTGGAGTGGATGTACCGATGATCCCTGAGATGGTCTTGTCTTCTGAAAGC…	GVTVIVLVVLAGVEAIAAVGGGPFFARRLGQPQGVRQGVPPEVAVPPEHLATGVAVVGLDVGVRQEVRFEVTALVESATARRALVRGVLHVEDAVHCQCPGLAKTLSALRALERLLLGVDVPMIPEMVLSSESLLADV	Double_zinc_ribbon|PF12773.5;Zinc-finger_double_domain|PF13465.4;C4-type_zinc_ribbon_domain|PF02591.13;Hydrogenase/urease_nickel_incorporation,_metallochaperone,_hypA|PF01155.17;C2H2-type_zinc_finger|PF13894.4;Prokaryotic_RING_finger_family_1|PF14446.4;zinc-ribbon|PF14369.4;C2H2_type_zinc-finger_(1_copy)|PF16293.3;AN1-like_Zinc_finger|PF01428.14;Zinc_ribbon_domain|PF09723.8;SprT-like_family|PF102…	AAT35590.1	224.6	120
TRINITY_DN15126_c0_g1_i2	type:internal	441	CACACTGACGAAAGACCGTATACCTGTGACATTTGCCATAAGGCTTTCAGGAGACAAGATCACCTTAGGGATCACAGGTATATCCATTCAAAAGAAAAGCCTTTCAAGTGCTCGGAGTGCGGAAAGGGTTTTTGCCAGTCCAGGACATTGGCAGTGCACCGCATCCTCCACATGGAGGACTCCCCGCACAAGTGCCCTACGTGCGGTCGCACTTTCAACCAGCGCAGTAACCTCAAAACGCACCTCCTGACGCACACCGACATCAAGCCCTACAACTGCGACTCCTGTGGCAAGGTGTTCAGGAGGAACTGCGACCTCAGGAGGCACACCCTGACGCACACCCTGGGGCTGCCCGAGGCGCCGTGCGAAGAAGGGTCCCCCACCAACAGCTGCGATCGC…	HTDERPYTCDICHKAFRRQDHLRDHRYIHSKEKPFKCSECGKGFCQSRTLAVHRILHMEDSPHKCPTCGRTFNQRSNLKTHLLTHTDIKPYNCDSCGKVFRRNCDLRRHTLTHTLGLPEAPCEEGSPTNSCDRFYAGEDDEDDDSHS	Double_zinc_ribbon|PF12773.5;Zinc-finger_double_domain|PF13465.4;C4-type_zinc_ribbon_domain|PF02591.13;Hydrogenase/urease_nickel_incorporation,_metallochaperone,_hypA|PF01155.17;C2H2-type_zinc_finger|PF13894.4;Prokaryotic_RING_finger_family_1|PF14446.4;zinc-ribbon|PF14369.4;C2H2_type_zinc-finger_(1_copy)|PF16293.3;AN1-like_Zinc_finger|PF01428.14;Zinc_ribbon_domain|PF09723.8;SprT-like_family|PF102…	AAK74066.1	245.4	141
TRINITY_DN15139_c0_g2_i1	type:5prime_partial	444	CCAAGTCCTCCTCCTCCAAGTCCTCCTCCTCCAAGTCCTCCTCCTCCAAGTCCTCCTCCTCCAAGTCCACCGCCTCCAAATCCACCGCCTCCAAGGCCTCCTCCTCCAAGGCCTCCTCCTCCAAGACCTTCTCCTCCAAGACCTCCTCCTCCTAGTTCTCCGCCAGTTTTTCCTCCTCCAAGTCCTCCACCACCTACTCCAAGGCCACCACCTCCATATCTGCCTCCACCTCCACCGTATCTGCCTCCTCCATATTTACCATATCCACTACGGTCAGCATTGACTGCAACAAACAGCACTATCGCTGCGAGTACTGGAAGGAAGACTCGCATGTTGAGATGCGTATCCGGTTCCGGCAATGGGATGGAAAAGCTCTTCAATGCTCCCCCAAAACTGTTT…	PSPPPPSPPPPSPPPPSPPPPSPPPPNPPPPRPPPPRPPPPRPSPPRPPPPSSPPVFPPPSPPPPTPRPPPPYLPPPPPYLPPPYLPYPLRSALTATNSTIAASTGRKTRMLRCVSGSGNGMEKLFNAPPKLFYTKFQPYLIRYQEG*	NA	ABZ83252.1	156	3375
TRINITY_DN15145_c0_g1_i1	type:internal	324	GCAATGCAAGAGGAAGTGCTGAAATTAGTTTTGTTGGCTCTGGAAGATGGTTCAGCTCTATCCAGAAAGGTTTTGGTGATGTTTGTTGTACAGCGACTTGCTCCTCATTTTCCACAAGCTTCAAAAACCAGTATTGGACATGTAGTACAGTTACTATACAGGGCCTCTTGTTTTAAGGTTTCTAAGCGTGAAGGAGATTCTTCATTAATGCAATTAAAGGAAGAATTTCGCACATATGAAGCTCTTAGAAGAGAACATGATGCTCAAATAGTCCAAATAGCAACTGAAGCAGGATTACGCATTGCACCAGAACAATGGTCATCA	AMQEEVLKLVLLALEDGSALSRKVLVMFVVQRLAPHFPQASKTSIGHVVQLLYRASCFKVSKREGDSSLMQLKEEFRTYEALRREHDAQIVQIATEAGLRIAPEQWSS	Protein_of_unknown_function_(DUF743)|PF05332.9	XP_001664250.1	206.1	111
TRINITY_DN15157_c0_g1_i1	type:internal	378	GCTGGTGGAGCTTGGAAAACAAATGATAAAGGACCATGGGATATGGTGCTTATTATTCATGGTTTTCCTAATGATGTGTCTGCTCTGAGGTTTGAATGGGCATGGCAGCATCCACAAGCTTCAAGAAGGCTTCGTCATGTAAACAAAAAACAGCCTCGAGAAAATGCTTTAAAATTTTGCTTTCGTGTGTTATCTGAAATGTTAAAAGTGGGACCATGGAATAGATTACCTTTAACAGTTCAGTGGCTTGATATAAATTATAAACAAGAATTTGATGTTTCCAAGTTACCTCCATTACATATTCCAATATGTTATGGTCCGATTCAGCCACGAAAATTTAAAAAATCTGAAGCCAAGGAAGATGAAAATGATGCTGAC	AGGAWKTNDKGPWDMVLIIHGFPNDVSALRFEWAWQHPQASRRLRHVNKKQPRENALKFCFRVLSEMLKVGPWNRLPLTVQWLDINYKQEFDVSKLPPLHIPICYGPIQPRKFKKSEAKEDENDAD	GIY-YIG_catalytic_domain|PF01541.22	XP_971859.1	165.6	99
TRINITY_DN15176_c0_g1_i1	type:complete	396	ATGAAGACTTGCTTCATTCTGGCGGTTTTTATGGTGATGTATTCGAATGGATGCTGTAGAGAGTCAGATTATGAAGGCTACAAGCATGACGACTCATCCACCAATCTCACCGAGAACGAGATGTTCACCAACTTCATGCGCCCTCAGCAATTCACGATGGGCACTCTACTCGGCCTTCTGGTGGCCTCTATAGTCGTGGTCATCGGGTCATTCTTGGTCCTCTGGAGGCTCTGCTGTGACGTGGAGATGAGGGTGACGAGAGAGGCCATTCAACCCCTCAAGAGTATATCGCAGATAGTGTCTGGAGACAAATCACCAAGGATGGAGACGAGGTCCGTGTCTGGACAATCCTTGTTGGGCCACAGTTCCTCCAGCAGTGGACTCGAAATAGCATGA	MKTCFILAVFMVMYSNGCCRESDYEGYKHDDSSTNLTENEMFTNFMRPQQFTMGTLLGLLVASIVVVIGSFLVLWRLCCDVEMRVTREAIQPLKSISQIVSGDKSPRMETRSVSGQSLLGHSSSSSGLEIA*	Domain_of_unknown_function_(DUF3475)|PF11961.6	NA	NA	2269
TRINITY_DN15179_c0_g1_i2	type:3prime_partial	534	ATGTCAACATCTTCTGCCAGATTGACAAGACAGAATGTTAGGAAAACCAGGAAAAAGAATTTCAAAAGGACAGTTTTTTCACGATCTAATATTCCAGTTGTTCGTGACTTAGAACCTCATATCATCTATTCTCCAGCTGGTTCTAGCACCAGTGGAATAAACTCTCCTCACCAGTCACCTTATGCCTTGAGACGCAAGCTGTCGCCACAGGAACCAAGTAGCCCAGGCTCTAGTAGTAATGGTCTTGCGAACTCTGAAAACCTGTGTTCTCATTCCTTACTCACGCGTAAGCGCCAGAGGCGCGTATTTTCCTCTTCACAGTCAATAGCAGATGACACGGGAGAGGCTGCCCACTATCTTTTATATGAATTACCTGATGAAGTTTTATTAACTATCTTC…	MSTSSARLTRQNVRKTRKKNFKRTVFSRSNIPVVRDLEPHIIYSPAGSSTSGINSPHQSPYALRRKLSPQEPSSPGSSSNGLANSENLCSHSLLTRKRQRRVFSSSQSIADDTGEAAHYLLYELPDEVLLTIFSYLLEQDLCRVAQVCKRFHIISSDTELWKTLYQNVYEYDLPLFNP	F-box_domain|PF00646.31;F-box|PF15966.3;PRANC_domain|PF09372.8;F-box-like|PF12937.5	AAQ23623.1	32.3	235
TRINITY_DN15181_c0_g1_i1	type:5prime_partial	333	ACAAAACTGTCTGAAGAAGTAGTTGCTAAAATTATACCAGTGTACCAGCGCCTTGCCTCAAATGAAATTCTTCTCTGCTGCGTTTCTGGCAAAACCCAAAATGCCAATGAAAGTTTACATAGTTGTGTTTGGAGGAAATGTCCCAAAGATGTGTTTGTGTCGAAGAAAAAATTTGAACTTGCAGTAATGGCAGTACTTAGTGAAGTAAACATTGGTTATGTTGAAACTTTAAAATCAAACAATAGTGGAACAGTAGATGTTGCATTCAAACTTTCCACTGATGGATATTCGAAGGTTGTCGCAAAGAAAGCGAAAAGCTTCAGAACAATATAA	TKLSEEVVAKIIPVYQRLASNEILLCCVSGKTQNANESLHSCVWRKCPKDVFVSKKKFELAVMAVLSEVNIGYVETLKSNNSGTVDVAFKLSTDGYSKVVAKKAKSFRTI*	NA	NA	NA	211
[truncated: 19,360 more rows]

## Sheet: Table S3
Supplementary Table 3. Summary of transcripts encoding proteins homologous to spidroins.
Transcript	Pfam annotation	NCBI_match	NCBI_log (e-value)
TRINITY_DN87374_c0_g3_i1	Major_ampullate_spidroin_1_and_2|PF11260.6	AAV48921.1	156.4
[truncated: 45 more rows]

## Sheet: Table S4
Supplementary Table 4. Identified proteins in Nephila clavipes spider silk glands by gel-free bottom-up proteomic approach.
[truncated: 1,811 more rows]
[truncated: 25 more columns]

[truncated: 10 more sheets: Table S5,  Table S6 (i), Table S6 (ii), Table S6 (iii), Table S6 (iv), Table S6 (v), Table S6 (vi), Table S7, Table S8, Table S9]
